# Supplementary material for: Wheat pathogen Zymoseptoria tritici N-myristoyltransferase inhibitors: on-target antifungal activity and an unusual metabolic defense mechanism
Source: bioRxiv preprint, doi:10.1101/2020.02.09.940536, version 1 (2020-02-10)
Supplement: Supporting Table S2 [file 940536_file04.xlsx]

## Sheet: Sheet4
Supplementary Table S3. Proteomics data supporting experiments described in the main text
Sheet 1 - Identification of myristoylated proteins
	Experimental methods described in: Label-free proteomics for the identification of myristoylated protein
Sheet 2 - Inhibition of NMT and analysis of myristoylated proteins
	Experimental methods described in: TMT-based proteomics analysis of myristate enriched proteins after NMT inhibition
Sheet 3 - Impact of NMT inhibition on the whole proteome of Z. tritici
	Experimental methods described in: TMT-based proteomics analysis of the whole lysate after NMT inhibition

## Sheet: Myristoylation ID
Gene names	30 µM YnMyr			30 µM YnMyr + 30 µM Myr			Average Log2 difference	t-test Significant	t-test -Log p value	Gly at 2nd Position	Predicted Myristoylation (Myristoylator)	Myrystoylator prediction score (-1 to 1)	Peptides	Razor + unique peptides	Unique peptides	Sequence coverage [%]	Mol. weight [kDa]	Q-value	Score	Intensity	MS/MS count	Protein IDs
A9Y5H1	23.2074	21.2167	23.3903	18.7914	18.9957	21.9837	2.68119		1.01095			NaN	1	1	1	2.1	73.447	0	3.3532	36341000	6	A9Y5H1
A9Y5I3	NaN	23.0548	22.9244	22.4996	23.2164	23.3543	-0.0338408		0.0323853			NaN	2	2	2	12	28.571	0.0013089	2.2599	70722000	4	A9Y5I3
A9Y5I7	19.5022	19.5016	20.6429	NaN	19.0927	20.7685	-0.0483465		0.0198601			NaN	1	1	1	10.9	28.243	0.0059032	1.7023	7946600	2	A9Y5I7
F9WW35	26.6482	26.9043	27.1503	26.9393	27.3345	26.9717	-0.180918		0.397319			NaN	13	13	13	46.2	59.215	0	254.34	1418400000	76	F9WW35
F9WW39	23.3076	23.0447	24.1533	22.7576	23.441	23.0186	0.429478		0.479166	+		-0.935929	5	5	5	8.4	125.55	0	10.547	99580000	12	F9WW39
F9WW40	21.2511	21.7695	21.482	21.4399	21.5428	21.8809	-0.120348		0.235952			NaN	1	1	1	9.7	32.412	0	2.909	28374000	8	F9WW40
F9WW44	NaN	21.5467	21.7748	21.6653	21.1084	21.2391	0.323126		0.58543			NaN	2	2	2	4.8	76.109	0	4.9882	23813000	8	F9WW44
F9WW67	23.7241	23.7494	23.7094	23.2193	23.6266	23.8923	0.148259		0.308373			NaN	4	4	4	18.1	57.022	0	13.36	123870000	17	F9WW67
F9WW88	21.1607	21.2345	21.0437	21.8207	20.5965	20.7764	0.0818164		0.0745036			NaN	1	1	1	4.5	57.525	0.0024631	1.9205	21414000	6	F9WW88
F9WW99	22.1668	21.8936	22.9946	21.0457	22.1623	20.9949	0.950726		0.877196			NaN	3	3	3	9.8	76.018	0	7.7354	36832000	6	F9WW99
F9WWA4	26.4694	27.3825	26.7078	27.4037	27.3241	27.6133	-0.593826		0.970188			NaN	6	6	6	42.7	32.767	0	189.49	1681800000	59	F9WWA4
F9WWA5	17.7466	16.5748	17.6655	17.4169	17.3955	NaN	-0.0772085		0.0534025			NaN	2	2	2	2.6	173.77	0	4.4751	7348100	2	F9WWA5
F9WWA8	23.1689	22.5187	NaN	23.0815	22.9388	22.812	-0.100314		0.138081			NaN	2	2	2	11.8	35.376	0	14.206	72403000	3	F9WWA8
F9WWB1	27.1706	27.1313	26.8029	24.9326	25.368	24.8292	1.99167	+	3.22581	+	+	0.990271	8	8	8	32.3	58.201	0	262.19	674630000	58	F9WWB1
F9WWD2	23.3617	22.8597	23.0257	23.1296	23.6253	22.8752	-0.12767		0.183527			NaN	4	4	4	27.4	23.507	0	40.147	92687000	15	F9WWD2
F9WWE1	26.1451	26.3488	25.7786	25.836	26.1824	26.5049	-0.0835978		0.119375	+		-0.972894	11	11	11	22.9	74.673	0	195.06	835380000	43	F9WWE1
F9WWE6	22.9141	22.1284	22.2085	NaN	22.1816	NaN	0.235427		0			NaN	1	1	1	2.9	41.797	0.0068337	1.4701	32166000	1	F9WWE6
F9WWH2	25.1933	24.2539	24.8526	23.2788	23.8085	24.2271	0.99508		1.20476			NaN	7	7	7	24.6	48.24	0	35.96	197180000	28	F9WWH2
F9WWH6	22.9375	22.2806	23.6294	22.9313	23.1258	22.6683	0.0407047		0.0334168			NaN	2	2	2	5.2	56.89	0	2.7153	68843000	3	F9WWH6
F9WWH9	27.5065	28.3375	27.5444	25.3828	25.7499	26.3348	1.97362	+	2.15365	+	+	0.989287	10	10	10	49.3	40.634	0	323.31	1249600000	97	F9WWH9
F9WWI5	25.6369	26.1092	25.5312	26.0166	25.5169	25.9317	-0.0626055		0.0950688			NaN	8	8	8	36.3	34.337	0	18.694	668530000	23	F9WWI5
F9WWJ1	27.8074	27.6273	27.3863	27.7529	27.5325	27.2172	0.106116		0.207817			NaN	17	17	17	39.3	71.816	0	136.72	1874800000	89	F9WWJ1
F9WWJ5	22.1369	21.9467	21.9265	21.9119	21.592	21.4467	0.353189		1.08628			NaN	1	1	1	4.6	34.441	0	3.9867	30644000	7	F9WWJ5
F9WWK2	21.5588	21.2044	21.5793	21.2977	21.1334	21.3705	0.180287		0.570917			NaN	1	1	1	3.3	52.415	0	2.3769	21281000	5	F9WWK2
F9WWM2	22.9167	22.4908	22.9512	22.6772	22.8244	22.0953	0.253908		0.402302			NaN	3	3	3	16.6	34.616	0	9.1817	61157000	12	F9WWM2
F9WWN3	22.5694	22.3948	22.3976	22.4402	22.6584	22.3047	-0.0138601		0.0398972			NaN	2	2	2	16.7	26.069	0	4.0446	56735000	2	F9WWN3
F9WWP1	23.3888	22.5946	23.1591	23.1434	22.9331	22.6255	0.146862		0.20246	+		-0.984854	2	2	2	15.8	16.063	0	4.8909	66820000	9	F9WWP1
F9WWR1	25.4509	25.9013	25.1177	25.9314	25.9385	26.4232	-0.607734		1.02128			NaN	9	9	9	26	70.485	0	61.854	596650000	37	F9WWR1
F9WWS5	22.7974	24.1066	24.577	24.6961	24.7427	24.4376	-0.798494		0.669875	+		-0.985073	4	4	4	27.3	25.65	0	9.3076	198230000	14	F9WWS5
F9WWS7	23.8454	24.3867	25.0434	24.4961	24.5505	25.1342	-0.301757		0.305626			NaN	8	8	8	15.2	101.44	0	53.057	271860000	27	F9WWS7
F9WWU7	26.0879	25.5209	25.6962	22.9452	22.9165	22.1897	3.08457	+	3.30464	+	+	0.958277	5	5	5	36.7	23.098	0	107.31	235880000	9	F9WWU7
F9WWV8	26.0694	25.9084	26.2657	26.032	26.3945	26.3269	-0.16996		0.487242			NaN	3	3	3	4.1	125.23	0	5.5429	748610000	9	F9WWV8
F9WWX1	26.2087	25.1315	26.4069	25.0771	25.5095	24.5176	0.880944		0.835075			NaN	3	3	3	4.8	127.01	0	5.7411	432870000	3	F9WWX1
F9WWX6	NaN	20.7977	NaN	20.7146	20.698	20.1807	0.266595		0			NaN	1	1	1	4.3	35.087	0.002574	2.1255	11081000	3	F9WWX6
F9WX29	23.3876	23.0222	23.8447	22.831	22.759	21.9788	0.895281		1.1629			NaN	2	2	2	6.1	64.131	0	28.356	71251000	9	F9WX29
F9WX30	23.9053	23.2499	22.6985	22.6585	22.895	23.4608	0.279802		0.264563			NaN	3	3	3	17.4	33.431	0	3.9038	90662000	4	F9WX30
F9WX71	21.6929	21.4867	19.3908	20.7466	21.7478	22.0979	-0.673997		0.330631			NaN	3	3	3	16.3	30.81	0	3.3042	32524000	7	F9WX71
F9WX73	21.4167	21.2677	20.8742	21.0595	21.0883	20.4001	0.336889		0.536518			NaN	2	2	2	6.9	49.387	0	2.9194	24150000	2	F9WX73
F9WX81	23.5863	23.577	23.9268	23.2343	23.452	23.5419	0.287318		0.913225			NaN	5	5	5	11.9	68.415	0	13.654	123380000	23	F9WX81
F9WX89	24.2233	24.8676	24.4538	24.2119	24.0733	24.6339	0.208534		0.341152			NaN	4	4	4	27.2	34.052	0	32.067	213290000	15	F9WX89
F9WX99	24.5066	23.8486	24.7626	23.8043	24.0449	22.7571	0.837139		0.806652			NaN	5	5	5	21.2	66.872	0	13.864	145330000	21	F9WX99
F9WXA4	25.2117	24.8471	25.0493	22.8037	22.8763	23.2743	2.05131	+	3.46783	+	+	0.822034	5	5	5	38.8	31.019	0	28.357	174680000	17	F9WXA4
F9WXB5	21.7057	22.0668	NaN	21.9304	22.216	21.988	-0.158582		0.363793			NaN	2	2	2	16.7	24.318	0	2.9128	26454000	1	F9WXB5
F9WXE5	23.7428	23.1023	23.5112	22.8324	23.0908	23.1277	0.435146		0.975422			NaN	4	4	4	10	122.74	0	6.4133	82258000	10	F9WXE5
F9WXF6	23.3251	22.3595	23.5247	22.9451	22.797	21.5511	0.638715		0.487873			NaN	3	3	3	10.2	49.709	0	10.695	74273000	18	F9WXF6
F9WXG0	21.7939	25.2421	NaN	25.9419	25.8531	25.7069	-2.31595		0.769483			NaN	3	3	3	17.4	23.944	0	7.3645	312510000	9	F9WXG0
F9WXG1	25.1683	25.6374	25.5031	25.4283	25.7817	25.7457	-0.215638		0.530343			NaN	3	3	3	30.9	14.725	0	6.7018	487110000	14	F9WXG1
F9WXG3	23.5393	22.9296	23.3873	23.1003	22.9256	21.7292	0.700383		0.679772			NaN	3	3	3	4	157.5	0	8.9157	68757000	6	F9WXG3
F9WXG7	23.2387	22.847	22.8523	22.7106	22.8763	22.5097	0.280473		0.771228			NaN	4	4	4	12.3	57.849	0	5.8465	73985000	10	F9WXG7
F9WXH7	24.6412	24.9937	22.6516	NaN	24.0872	24.7004	-0.29834		0.108896			NaN	1	1	1	5.8	63.039	0.0078125	1.3618	67645000	1	F9WXH7
F9WXI5	22.7573	23.1524	22.9405	23.0185	23.1949	22.6865	-0.0165927		0.0297379			NaN	1	1	1	6.7	46.897	0	10.792	85334000	11	F9WXI5
F9WXJ0	24.922	24.7654	24.9077	24.9672	24.9092	24.9045	-0.0619634		0.502391			NaN	10	10	10	32.5	59.111	0	49.486	319660000	28	F9WXJ0
F9WXN2	22.5702	22.1384	22.4769	21.6732	21.9882	21.6146	0.636524		1.65649			NaN	3	3	3	10.3	61.953	0	7.6797	43922000	10	F9WXN2
F9WXQ1	24.2539	23.6991	24.0305	24.2944	23.9744	23.9351	-0.0734526		0.137555			NaN	6	6	6	27.3	54.363	0	11.747	181740000	13	F9WXQ1
F9WXQ2	24.0341	21.7677	23.5926	22.1707	21.7683	21.9249	1.17688		0.770396	+		-0.971582	4	4	4	15.5	47.564	0	3.9872	63637000	8	F9WXQ2
F9WXQ5	24.6064	25.5892	25.3833	25.1792	25.2412	25.2216	-0.0210222		0.0234367			NaN	10	10	10	36	44.912	0	178.7	544540000	29	F9WXQ5
F9WXR9	23.8647	24.0993	23.8905	23.8115	23.8716	24.222	-0.016894		0.0387649			NaN	4	4	4	17.5	53.2	0	10.298	162860000	15	F9WXR9
F9WXU5	24.3261	24.6835	25.098	22.6605	24.4076	24.3665	0.891008		0.652818			NaN	2	2	2	14.6	23.976	0	31.845	186880000	9	F9WXU5
F9WXV6	22.3963	22.0384	22.1181	21.1998	21.8513	21.0824	0.806426		1.4288			NaN	1	1	1	7.5	34.834	0	4.2225	29189000	3	F9WXV6
F9WXW9	22.9644	22.6029	23.3526	23.1412	22.4101	23.3087	0.0199769		0.0189508			NaN	4	4	4	8.2	82.416	0	6.0357	87069000	7	F9WXW9
F9WXY4	21.8783	21.5478	22.3703	22.4977	22.5656	22.0653	-0.444058		0.709656			NaN	2	2	2	10.5	36.586	0.0025126	2.0122	49320000	3	F9WXY4
F9WXY6	24.6744	24.0993	23.9646	24.2663	23.901	23.3048	0.42207		0.52285	+		-0.984645	5	5	5	37	27.421	0	20.595	159510000	13	F9WXY6
F9WXZ6	24.5067	25.4821	24.0891	25.2183	25.3049	25.5334	-0.659552		0.711744			NaN	6	6	6	20	51.652	0	57.038	415850000	32	F9WXZ6
F9WXZ7	21.1218	20.1875	20.9055	20.5849	20.0894	19.7471	0.59779		0.735285			NaN	1	1	1	2.5	61.938	0.0087527	1.2983	13490000	6	F9WXZ7
F9WY06	29.7603	29.986	29.693	29.6898	29.7079	29.7051	0.112188		0.560632			NaN	11	11	11	43.6	34.085	0	242.92	9824500000	260	F9WY06
F9WY19	23.6341	23.5862	23.5181	23.8413	23.9455	23.2822	-0.110195		0.203851			NaN	5	5	5	19.5	43.795	0	15.286	124610000	21	F9WY19
F9WY22	20.0118	18.8457	21.1893	19.7235	20.9968	19.8464	-0.173254		0.0773292			NaN	1	1	1	1.4	113.53	0	3.0098	11127000	2	F9WY22
F9WY53	NaN	23.45	24.3281	22.9517	22.5853	23.1881	0.980685		1.04328			NaN	3	3	3	13.6	40.549	0	18.53	96646000	8	F9WY53
F9WY55	22.197	21.7309	21.9792	NaN	21.8381	20.9469	0.57649		0.654271			NaN	1	1	1	4.4	43.853	0.0077951	1.3452	28201000	6	F9WY55
F9WY57	23.0527	21.3495	23.2443	21.1621	21.8938	21.0558	1.1783		0.831202			NaN	3	3	3	7.7	56.704	0	5.1853	37049000	3	F9WY57
F9WY68	25.3054	25.1846	25.1893	25.2203	25.2312	24.7628	0.154987		0.413662			NaN	12	12	12	17.3	130.24	0	70.209	319550000	32	F9WY68
F9WY70	21.4246	21.1248	21.2394	20.9293	20.8069	20.2223	0.610076		1.21986			NaN	NaN	NaN	NaN	5.6	NaN	NaN	NaN	NaN	NaN	F9WY70
F9WY76	NaN	22.8617	NaN	22.3666	22.863	22.9199	0.14526		0			NaN	3	3	3	12.9	84.68	0	4.2614	52162000	4	F9WY76
F9WY96	23.538	23.5162	23.2042	23.0945	23.3869	23.2312	0.181925		0.593833			NaN	4	4	4	5.5	136.52	0	17.103	103900000	17	F9WY96
F9WY98	22.4899	21.9974	21.7208	21.4478	22.0667	20.926	0.589184		0.66975			NaN	1	1	1	8.7	27.164	0.0025641	2.1178	31705000	7	F9WY98
F9WYA5	23.294	22.2567	22.379	21.2688	22.571	21.7361	0.784617		0.713952			NaN	2	2	2	9.9	49.133	0	5.0584	51908000	5	F9WYA5
F9WYC1	23.5421	21.93	24.1537	22.7469	21.6091	22.0782	1.06385		0.649061			NaN	2	2	2	24.5	16.494	0	6.0208	68661000	8	F9WYC1
F9WYC2	22.7481	23.0223	21.9068	23.0512	23.2173	21.7666	-0.11926		0.0736621			NaN	3	3	3	44.1	11.043	0	14.617	53422000	6	F9WYC2
F9WYD0	25.1551	24.921	25.3646	25.01	25.0057	24.7161	0.236307		0.666053			NaN	11	11	11	18.1	106.68	0	60.038	350000000	52	F9WYD0
F9WYD5	26.062	26.0131	25.5	26.1995	25.79	25.5303	0.0184441		0.0232542	+		-0.980445	5	5	5	35.7	22.569	0	107.47	598600000	28	F9WYD5
F9WYE8	22.9917	22.5086	22.8162	22.9391	22.6041	22.417	0.118769		0.222931			NaN	1	1	1	2.5	90.291	0.0076923	1.3207	58999000	3	F9WYE8
F9WYG2	28.516	28.3778	28.4481	28.3001	28.2739	28.0269	0.247037		1.21268			NaN	17	17	17	41.3	59.68	0	261.7	3129800000	122	F9WYG2
F9WYH0	26.2961	26.5532	26.2289	26.2136	26.3771	26.328	0.0531775		0.184303			NaN	12	12	12	30.6	80.574	0	63.787	790000000	54	F9WYH0
F9WYH5	23.6561	23.0196	23.4225	23.0857	23.1639	23.4707	0.12598		0.223743			NaN	3	3	3	24.5	31.419	0	16.012	167790000	25	F9WYH5
F9WYH7	25.7834	25.578	24.6728	NaN	24.0408	24.4008	1.12391		1.03431			NaN	4	4	4	39.2	29.891	0	34.166	381080000	15	F9WYH7
F9WYI1	26.301	26.8675	26.1661	27.2663	26.9476	26.3797	-0.419719		0.551853			NaN	5	5	5	23	44.171	0	18.162	976960000	19	F9WYI1
F9WYI8	27.3387	27.554	26.8323	27.6144	27.3988	27.2897	-0.192627		0.340068			NaN	6	6	6	46.6	21.891	0	108.83	1808600000	63	F9WYI8
F9WYM3	23.1666	23.223	24.2636	23.2717	22.8553	22.6218	0.634772		0.718217			NaN	3	3	3	14.1	40.805	0	28.349	92652000	11	F9WYM3
F9WYP0	22.8285	22.4916	21.6483	22.325	21.5572	21.7625	0.441289		0.453424	+		-0.984505	2	2	2	18	16.649	0	3.1943	86500000	11	F9WYP0
F9WYR2	22.4733	22.3353	22.4229	22.8905	23.0513	22.8331	-0.514461		2.58932			NaN	4	4	4	17.2	57.581	0	3.8558	71491000	12	F9WYR2
F9WYR9	25.05	25.5907	24.6065	26.187	25.7805	25.0994	-0.606532		0.642461			NaN	4	4	4	47.7	9.5486	0	68.9	480940000	29	F9WYR9
F9WYT8	24.2505	24.0474	23.5862	25.1471	24.647	24.5222	-0.810708		1.38089			NaN	7	7	7	20	60.943	0	32.442	232890000	21	F9WYT8
F9WYX3	23.9835	23.4259	23.5561	23.158	23.4028	22.91	0.498233		1.06214			NaN	5	5	5	10.2	52.209	0	27.12	121060000	11	F9WYX3
F9WYX5	24.0293	24.3297	23.8686	24.8201	24.683	23.9932	-0.422904		0.662162			NaN	7	7	7	17.3	69.503	0	61.472	214230000	18	F9WYX5
F9WYX7	21.4371	21.5143	21.6329	21.1779	20.8143	20.5624	0.676528		1.64605			NaN	1	1	1	5.8	27.543	0	3.229	19971000	5	F9WYX7
F9WYY8	25.5003	25.2695	24.6925	25.0872	25.5369	24.7685	0.0232665		0.0237399			NaN	6	6	6	23.9	40.622	0	13.903	397110000	20	F9WYY8
F9WYZ2	21.3161	20.5934	21.47	NaN	21.0741	20.7503	0.214269		0.220171			NaN	1	1	1	1.9	76.657	0.0057471	1.5658	12449000	1	F9WYZ2
F9WZ06	22.7416	22.8932	21.9708	22.6393	22.5337	22.6614	-0.0762151		0.094449	+		-0.984979	2	2	2	13.3	20.589	0	5.9592	77673000	13	F9WZ06
F9WZ12	19.276	NaN	22.8803	22.0473	22.5187	22.6237	-1.31847		0.392965			NaN	1	1	1	7.7	23.547	0	18.612	45811000	6	F9WZ12
F9WZ35	25.2597	24.7199	25.1314	25.1899	25.3035	25.1622	-0.181544		0.466217			NaN	6	6	6	10.9	92.368	0	19.535	361830000	26	F9WZ35
F9WZ43	23.4043	22.39	22.7344	22.0828	22.4292	21.8283	0.729478		0.991573			NaN	3	3	3	10.5	51.582	0	12.742	56179000	10	F9WZ43
F9WZ58	26.0867	26.1539	25.9184	25.9673	25.8005	25.7279	0.221158		1.04234			NaN	3	3	3	15.3	23.306	0	14.784	572500000	14	F9WZ58
F9WZ63	22.1392	22.454	22.9012	22.2624	22.2281	22.9049	0.0329895		0.0357994			NaN	1	1	1	4.2	53.253	0.0025189	2.0319	58350000	5	F9WZ63
F9WZ76	24.3677	23.8665	24.6994	24.27	24.2959	23.8888	0.159601		0.226569			NaN	6	6	6	30	31.592	0	21.943	181640000	21	F9WZ76
F9WZ77	NaN	20.4885	NaN	20.5144	20.3835	20.569	-0.000530879		0			NaN	1	1	1	24.1	12.143	0	7.6822	27798000	2	F9WZ77
F9WZ83	25.1217	25.7144	24.9317	25.3634	25.3657	25.7311	-0.230827		0.362825			NaN	12	12	12	17.1	144.04	0	80.897	449990000	46	F9WZ83
F9WZ94	21.4346	20.7967	21.2593	21.6281	20.5039	20.5135	0.28165		0.269089			NaN	2	2	2	3.9	70.244	0	2.3824	24817000	4	F9WZ94
F9WZB1	24.4628	24.0639	24.6713	24.2956	24.6377	24.2319	0.0108986		0.0165718			NaN	5	5	5	7.7	133.96	0	12.782	147040000	10	F9WZB1
F9WZB3	23.8262	24.0428	24.0239	24.5385	23.3625	24.4359	-0.148011		0.143623			NaN	2	2	2	6.1	51.974	0	5.0997	168020000	4	F9WZB3
F9WZB9	23.7942	23.5765	24.2923	23.764	23.9391	23.858	0.0339495		0.0536996			NaN	5	5	5	15	67.763	0	24.079	145220000	14	F9WZB9
F9WZD1	23.2716	23.2305	24.0942	23.2867	23.0648	23.704	0.180231		0.206124			NaN	2	2	2	19.1	18.156	0	9.0169	121920000	11	F9WZD1
F9WZD7	24.5038	24.3875	24.2321	23.8449	24.2055	23.422	0.550316		1.07924			NaN	2	2	2	15.4	18.812	0	37.763	160830000	13	F9WZD7
F9WZE4	25.4798	25.4563	25.0063	25.6704	25.9545	25.5696	-0.417334		1.01826			NaN	1	1	1	3.3	50.136	0.0096878	1.2513	468210000	1	F9WZE4
F9WZE7	25.5595	25.0481	25.2955	25.3547	25.0666	24.6022	0.293235		0.482232			NaN	4	4	4	20.6	33.019	0	13.413	356800000	25	F9WZE7
F9WZF3	24.584	24.2075	24.4898	24.4221	24.2303	23.9222	0.235568		0.567748			NaN	5	5	5	18.2	51.039	0	173.34	186930000	20	F9WZF3
F9WZJ0	25.6214	26.6833	25.6791	27.0235	26.8007	26.6301	-0.823484		1.06601			NaN	4	4	4	30.5	28.473	0	53.929	1026500000	42	F9WZJ0
F9WZJ7	NaN	NaN	20.638	20.915	21.7547	21.3125	-0.689353		0			NaN	1	1	1	5.3	25.138	0.0058893	1.6994	16730000	4	F9WZJ7
F9WZL1	21.4927	21.6286	21.6382	NaN	21.3377	21.3898	0.22279		1.40306			NaN	2	2	2	9.8	27.823	0	4.3175	24653000	4	F9WZL1
F9WZM0	25.5141	24.2958	25.4697	24.0139	23.9699	23.5274	1.25612		1.37028			NaN	7	7	7	11.4	102.06	0	117.25	214870000	26	F9WZM0
F9WZM4	24.7986	24.4193	24.4836	24.1667	24.3961	24.0979	0.346946		1.1033			NaN	7	7	7	11.7	101.05	0	35.619	225540000	19	F9WZM4
F9WZN1	27.5884	27.2954	27.571	27.0207	27.2147	27.0919	0.37582		1.56433			NaN	9	9	9	43.6	42.584	0	110.08	1734000000	82	F9WZN1
F9WZN9	NaN	NaN	NaN	20.9586	20.6786	20.7394	NaN		0	+		-0.979216	1	1	1	7.9	25.344	0.0097297	1.2565	10456000	1	F9WZN9
F9WZQ1	23.0275	24.2252	24.4187	24.2513	24.3801	24.6181	-0.52605		0.514893			NaN	6	6	6	19.7	47.248	0	36.072	209840000	17	F9WZQ1
F9WZQ2	24.8184	25.904	25.5267	25.8633	25.8864	25.8292	-0.443263		0.626031	+	+	0.564568	7	7	7	44.4	29.607	0	323.31	801490000	51	F9WZQ2
F9WZT7	23.6842	23.7501	23.8726	23.3765	23.7445	22.1691	0.672274		0.632399			NaN	2	2	2	16.1	32.583	0	5.3001	151400000	14	F9WZT7
F9WZU8	22.2802	21.9992	21.9811	21.9973	21.7083	21.6952	0.286537		0.971578			NaN	2	2	2	14.2	38.54	0	3.2734	39448000	2	F9WZU8
F9WZV8	22.3744	21.8212	22.728	22.1203	22.7022	22.4581	-0.118971		0.140652			NaN	2	2	2	11.8	27.681	0	4.1355	53921000	3	F9WZV8
F9WZW0	NaN	21.9784	22.5028	21.373	21.9515	21.5507	0.615545		0.892406			NaN	2	2	2	4.9	75.265	0	8.1447	31286000	4	F9WZW0
F9WZZ7	25.1462	24.5791	24.8844	24.8415	25.0039	25.2362	-0.157323		0.323			NaN	4	4	4	24	39.064	0	64.688	333210000	19	F9WZZ7
F9X002	23.6282	22.6043	23.6005	23.0388	22.8959	22.8126	0.361898		0.4545			NaN	5	5	5	5.7	141.53	0	6.9839	83441000	4	F9X002
F9X003	22.9022	22.01	22.4074	22.0537	22.1219	21.2742	0.623261		0.765142			NaN	1	1	1	14.3	28.022	0.0013004	2.2122	23509000	4	F9X003
F9X004	29.0024	29.0107	29.0054	29.0775	29.0338	28.3649	0.180726		0.321473	+		-0.978827	8	8	8	36.5	24.22	0	323.31	5531800000	134	F9X004
F9X035	25.1172	25.9045	25.3402	25.8108	25.5914	25.8781	-0.306171		0.541399			NaN	3	3	3	33.9	13.506	0	13.018	485230000	23	F9X035
F9X036	NaN	NaN	20.485	19.4319	19.7197	19.8649	0.812867		0			NaN	1	1	1	2.4	78.893	0.0024969	1.9874	7036500	3	F9X036
F9X042	27.7025	28.0898	27.2324	27.8701	28.2341	28.0101	-0.363178		0.603443			NaN	7	7	7	33.9	37.842	0	241.55	2626400000	83	F9X042
F9X050	21.8579	21.1123	22.2904	21.7833	21.4313	20.6374	0.469517		0.413398			NaN	4	4	4	16.4	56.918	0	11.127	32218000	9	F9X050
F9X065	25.5247	24.877	25.3721	25.0381	24.5716	24.874	0.430056		0.836532			NaN	8	8	8	25.5	57.779	0	51.791	348880000	27	F9X065
F9X0A1	26.5299	25.9314	26.1677	25.7926	25.8457	26.049	0.313889		0.756371			NaN	9	9	9	28.2	46.422	0	105.48	624880000	22	F9X0A1
F9X0B1	23.0654	23.0203	23.0945	23.0546	23.2452	22.7126	0.0558821		0.130575			NaN	4	4	4	6.1	165.74	0	7.0383	81584000	13	F9X0B1
F9X0C2	22.7737	22.9849	23.2618	22.6803	22.7984	22.2492	0.430866		0.920196			NaN	2	2	2	4.2	72.973	0	7.4519	54997000	3	F9X0C2
F9X0D1	24.5728	24.2727	24.8999	25.254	24.3596	23.988	0.0479374		0.0390351			NaN	4	4	4	25.8	22.089	0	15.363	246460000	21	F9X0D1
F9X0D3	20.704	21.9673	NaN	22.1033	22.5631	23.0642	-1.2412		0.89693			NaN	1	1	1	1.9	93.877	0.005787	1.6115	41895000	4	F9X0D3
F9X0G1	21.2518	21.8133	20.5708	22.0802	NaN	21.0371	-0.346673		0.216918			NaN	2	2	2	7	45.771	0	16.797	27469000	4	F9X0G1
F9X0H6	21.919	20.9225	22.2376	21.3888	21.9602	21.232	0.166021		0.13492	+		-0.984554	1	1	1	6.7	25.222	0.0058824	1.6989	28673000	3	F9X0H6
F9X0I9	22.7352	23.935	23.2866	24.316	23.4243	23.1645	-0.316011		0.255361			NaN	1	1	1	7.7	29.403	0	3.2135	127720000	8	F9X0I9
F9X0L4	28.1416	28.264	27.9155	25.3185	25.6006	26.1975	2.40148	+	3.00252	+	+	0.990434	6	5	5	43.2	20.632	0	36.277	1495400000	48	F9X0L4
F9X0L6	NaN	NaN	19.8655	21.7056	22.1872	22.5949	-2.29707		0			NaN	1	1	1	6.6	35.401	0	3.1169	25591000	2	F9X0L6
F9X0P3	22.5743	22.0894	22.2668	22.4238	21.5615	21.3801	0.5217		0.673315			NaN	1	1	1	5.4	54.477	0	2.605	37626000	3	F9X0P3
F9X0P4	22.4924	22.057	21.7267	NaN	NaN	21.1599	0.932168		0			NaN	1	1	1	12.8	14.138	0	3.5991	19088000	2	F9X0P4
F9X0U9	22.5899	22.2678	21.4663	NaN	22.2291	21.9297	0.0286185		0.0209897			NaN	1	1	1	6	30.2	0.0036058	1.8225	36210000	2	F9X0U9
F9X0V1	24.3858	23.2372	24.1233	22.6272	23.2213	22.1388	1.25301		1.25752			NaN	2	2	2	13.6	13.277	0	36.54	94572000	10	F9X0V1
F9X0V3	24.4826	24.1268	24.2992	23.9089	24.093	23.7535	0.384368		1.26937			NaN	3	3	3	18	44.865	0	28.524	163160000	14	F9X0V3
F9X0V7	25.0518	23.8036	24.9416	23.4867	23.7859	23.2257	1.09959		1.2004			NaN	5	5	5	34.8	37.777	0	34.471	181610000	13	F9X0V7
F9X0X2	24.3766	24.7955	24.2752	24.0535	23.9567	24.6522	0.261641		0.412635			NaN	7	7	7	35	35.73	0	23.302	269120000	22	F9X0X2
F9X0X6	NaN	20.1483	NaN	20.0223	19.1333	19.7647	0.508224		0			NaN	1	1	1	9.6	32.856	0.0025221	2.034	6219100	2	F9X0X6
F9X0Y1	NaN	NaN	29.3464	31.7774	31.4668	31.4051	-2.2034		0			NaN	2	2	2	3.3	84.119	0	2.393	3952200000	2	F9X0Y1
F9X0Y2	27.1811	27.7565	27.0955	27.1625	27.3161	27.5578	-0.00112851		0.00155183			NaN	14	14	14	40.5	61.459	0	323.31	1949100000	116	F9X0Y2
F9X0Y4	22.6707	22.0105	22.9534	22.2387	22.5775	21.9779	0.280209		0.35437			NaN	3	3	3	6.4	65.664	0	11.768	48923000	6	F9X0Y4
F9X0Y8	NaN	22.8597	23.2736	22.4373	21.9323	22.8807	0.649842		0.719555			NaN	4	4	4	15.7	55.421	0	13.198	68958000	5	F9X0Y8
F9X108	24.159	22.7677	24.2534	20.7524	22.5431	22.0173	1.95578		1.28052			NaN	2	2	2	5.1	85.172	0	45.975	77141000	6	F9X108
F9X119	21.6285	20.6051	21.7955	21.4058	21.5968	NaN	-0.158229		0.115792			NaN	1	1	1	1.8	62.908	0.0025349	2.087	14235000	1	F9X119
F9X121	23.0254	23.062	23.2445	23.1838	22.4063	22.5293	0.404185		0.739615			NaN	3	3	3	9.2	45.691	0	31.039	69901000	14	F9X121
F9X156	24.7464	24.8152	24.7375	24.6753	24.9009	24.742	-0.0063413		0.0299438			NaN	8	8	8	14.4	123.01	0	14.958	281630000	19	F9X156
F9X159	NaN	22.9426	NaN	22.0706	22.6248	22.9139	0.406212		0			NaN	3	3	3	26.5	21.396	0	4.0429	49175000	6	F9X159
F9X183	22.3085	22.1293	22.5907	22.324	22.3018	21.9564	0.148802		0.343386			NaN	2	2	2	4.3	74.612	0	3.0343	41988000	4	F9X183
F9X1A8	19.9791	19.5304	21.4734	20.9672	21.1468	20.961	-0.697339		0.518472			NaN	3	3	3	3.3	74.803	0	3.1652	24319000	10	F9X1A8
F9X1E6	25.0424	25.724	24.3194	25.2541	25.8705	25.6014	-0.546752		0.545593			NaN	8	8	8	28.7	43.632	0	48.881	573450000	44	F9X1E6
F9X1E9	28.9897	28.9722	28.7737	29.026	28.8997	28.9671	-0.0523942		0.26757	+		-0.960752	12	12	12	38.7	52.025	0	323.31	5080300000	128	F9X1E9
F9X1I2	31.6008	31.5671	30.7017	29.2524	29.3297	29.815	1.82419	+	2.22147	+	+	0.990405	10	10	9	68.9	20.993	0	323.31	16365000000	363	F9X1I2
F9X1I5	26.4046	25.9837	26.3928	26.1571	26.11	25.8674	0.215539		0.582806			NaN	6	6	6	32.3	24.035	0	323.31	809720000	34	F9X1I5
F9X1J1	26.6237	27.3324	26.5951	26.9628	27.0186	27.2315	-0.220608		0.361302			NaN	9	9	8	38.6	49.892	0	127.89	1354200000	74	F9X1J1
F9X1K3	26.2901	26.2171	26.5733	26.1426	26.1145	26.1222	0.23373		1.00652			NaN	8	8	8	38.7	40.764	0	111.37	758920000	41	F9X1K3
F9X1L0	22.6042	22.4393	22.4701	22.2128	22.7521	22.4256	0.0410442		0.0885298			NaN	2	2	2	8.1	39.026	0	2.7615	66969000	5	F9X1L0
F9X1L7	27.1474	27.2908	26.9723	27.3298	27.4832	27.0129	-0.138414		0.344846			NaN	13	13	13	43.8	44.824	0	59.359	1480100000	65	F9X1L7
F9X1N2	24.1532	23.7048	23.7157	23.4307	23.6471	23.2362	0.419869		1.04094			NaN	2	2	2	5.4	97.033	0	3.3051	122590000	5	F9X1N2
F9X1P8	21.9046	21.7092	24.1055	21.7366	21.4798	20.8428	1.22005		0.682376	+		-0.978852	1	1	1	3.6	59.931	0	2.7141	41286000	2	F9X1P8
F9X1S2	25.0512	25.3266	24.8224	25.0935	25.2722	25.1888	-0.118102		0.312016			NaN	9	9	9	26.4	60.394	0	44.537	379850000	24	F9X1S2
F9X1S7	25.7499	25.6406	25.5468	25.5517	25.8695	25.5763	-0.0200971		0.0591065			NaN	7	7	7	31	48.996	0	37.197	499200000	28	F9X1S7
F9X1T0	21.932	21.7224	NaN	22.2518	21.8382	21.5947	-0.0677172		0.0909175			NaN	1	1	1	3.2	41.766	0.007874	1.3813	30948000	2	F9X1T0
F9X1X5	NaN	22.6782	NaN	22.2093	22.7136	22.9382	0.0578626		0			NaN	1	1	1	8.2	35.228	0	7.924	44290000	3	F9X1X5
F9X202	NaN	21.0762	22.0835	21.7135	21.7999	21.2982	-0.0240132		0.0183969			NaN	1	1	1	3.2	44.9	0	3.002	24023000	4	F9X202
F9X232	23.7049	24.4329	23.7948	24.4649	24.314	24.269	-0.371738		0.718099			NaN	7	7	7	27	52.96	0	11.575	188970000	17	F9X232
F9X234	NaN	21.4577	NaN	22.2161	22.0868	21.5997	-0.509811		0			NaN	2	2	2	10	38.727	0	2.8694	30033000	3	F9X234
F9X236	23.5011	23.1324	23.1594	22.4592	22.3969	23.2558	0.56035		0.866391			NaN	5	5	5	9.3	111.5	0	19.239	89894000	12	F9X236
F9X237	23.7298	23.2674	23.5995	22.9758	23.2396	22.5653	0.605335		1.18744			NaN	3	3	3	14.6	26.843	0	8.5473	92699000	9	F9X237
F9X264	22.1388	22.2818	21.9734	21.9888	22.3007	22.3222	-0.0725562		0.199891			NaN	2	2	2	12	30.486	0.0058343	1.6693	38492000	2	F9X264
F9X284	25.3185	25.0506	25.4645	25.1811	25.1209	24.7777	0.251289		0.650855			NaN	9	9	9	23.4	70.673	0	78.689	332620000	36	F9X284
F9X2A6	24.1573	24.4333	24.2687	24.3088	24.2085	23.9736	0.1228		0.408335			NaN	4	4	4	22.2	38.76	0	8.1199	167410000	17	F9X2A6
F9X2E1	NaN	22.836	21.3251	21.9292	22.1033	23.1825	-0.324466		0.156684			NaN	2	2	2	46.2	14.415	0	2.8029	66400000	7	F9X2E1
F9X2E2	25.555	26.1437	25.4012	26.0803	26.0618	26.2874	-0.443178		0.868047			NaN	16	16	16	34.2	82.002	0	150.44	593590000	44	F9X2E2
F9X2F3	22.3746	21.5559	21.6812	21.8636	21.7368	21.7253	0.0953674		0.136183			NaN	1	1	1	4.7	28.007	0	2.6776	33827000	5	F9X2F3
F9X2G7	22.609	22.3325	22.1749	22.1241	22.0571	21.9197	0.338537		1.13388			NaN	2	2	2	2.6	119.61	0	16.367	42379000	9	F9X2G7
F9X2H4	29.1301	29.8933	28.7625	29.6711	29.7443	29.8097	-0.479719		0.646093			NaN	32	32	32	50.2	118.77	0	323.31	8689000000	266	F9X2H4
F9X2I2	23.1158	21.7119	23.632	22.1521	22.4242	21.716	0.722426		0.520547			NaN	1	1	1	0.7	194.96	0	19.569	50389000	8	F9X2I2
F9X2I3	26.4788	26.12	25.1759	23.0106	23.6674	23.1929	2.63463	+	2.42547	+	+	0.982673	4	4	4	32.8	20.729	0	8.2766	296470000	11	F9X2I3
F9X2J0	25.8621	25.6259	25.4756	25.5858	25.8003	25.5337	0.0145582		0.0354549			NaN	11	11	11	37.7	60.763	0	36.199	478250000	48	F9X2J0
F9X2J3	20.983	20.9282	20.6546	21.4041	NaN	20.7112	-0.202384		0.271674			NaN	1	1	1	1.9	99.585	0.0077093	1.333	13067000	3	F9X2J3
F9X2L7	23.2221	23.5578	24.5851	23.8533	23.9127	24.2867	-0.229208		0.205021			NaN	5	5	5	18.9	55.017	0	17.79	148710000	16	F9X2L7
F9X2P4	24.5719	22.1812	24.6324	NaN	21.8155	22.3694	1.70275		0.683425			NaN	3	3	3	34.2	26.463	0	11.784	111760000	6	F9X2P4
F9X2P5	NaN	23.1002	NaN	22.2996	22.4577	22.7685	0.591596		0			NaN	3	3	3	23.7	26.035	0	5.2485	53807000	6	F9X2P5
F9X2R5	24.8259	25.9837	25.2833	25.939	25.6711	26.0377	-0.518262		0.663421			NaN	7	7	7	22.8	52.362	0	323.31	720910000	36	F9X2R5
F9X2S9	25.5192	NaN	25.7681	26.6199	25.965	24.4825	-0.0454884		0.0180358			NaN	1	1	1	2.6	59.978	0.0077263	1.3353	334580000	4	F9X2S9
F9X2T8	29.1797	29.9657	29.3611	29.5911	29.9933	29.504	-0.193986		0.276988			NaN	13	13	13	64.8	36.222	0	323.31	10713000000	250	F9X2T8
F9X2U0	29.2039	30.508	29.5292	30.162	30.6974	31.515	-1.04443		0.875678			NaN	39	39	39	61	99.533	0	323.31	18490000000	498	F9X2U0
F9X2W5	22.5351	21.6876	22.2125	22.549	22.4722	21.3023	0.0372238		0.0263867			NaN	3	3	3	13.8	39.445	0	4.4076	43626000	10	F9X2W5
F9X2Z5	24.1466	22.2177	24.5825	22.2645	21.7662	21.865	1.68365		1.06586			NaN	4	4	4	3.5	206.81	0	5.8085	129000000	10	F9X2Z5
F9X2Z8	24.2806	24.0515	24.3452	23.7141	24.0011	23.7772	0.39497		1.47046			NaN	4	4	4	16.2	34.173	0	23.446	139430000	21	F9X2Z8
F9X2Z9	23.9071	25.5545	24.2272	24.7385	24.2254	25.2882	-0.187771		0.115579			NaN	6	6	6	38.7	20.876	0	37.633	302380000	22	F9X2Z9
F9X308	25.86	25.6202	25.4742	25.6212	25.852	25.4357	0.0151577		0.0309941			NaN	4	4	4	46.1	16.692	0	16.373	510850000	21	F9X308
F9X316	27.0742	27.5131	27.2277	27.3392	27.2003	27.5385	-0.0876783		0.209969			NaN	8	8	8	54.5	23.724	0	262.51	1887900000	58	F9X316
F9X318	21.5115	21.0917	21.3158	21.007	20.2853	20.1321	0.831547		1.31663			NaN	1	1	1	1.6	107.24	0.0057604	1.595	16505000	3	F9X318
F9X343	23.258	22.4111	22.6007	23.3325	23.5059	22.9969	-0.521861		0.81343			NaN	3	3	3	10.1	60.904	0	8.0954	73440000	7	F9X343
F9X3B1	22.4085	22.168	22.2792	22.8973	22.6307	22.0983	-0.256933		0.451739			NaN	2	2	2	12.3	28.044	0	7.7177	59902000	7	F9X3B1
F9X3D9	26.1587	27.2533	26.1062	26.6278	26.7117	26.9159	-0.245758		0.254466			NaN	13	13	13	40.4	51.027	0	139.42	1399500000	68	F9X3D9
F9X3I3	25.2337	24.4066	25.2535	24.8771	24.4417	24.0439	0.510367		0.622966			NaN	1	1	1	4.2	32.474	0	3.0188	238200000	6	F9X3I3
F9X3I5	22.0576	22.1539	22.8868	21.9355	22.9992	22.1245	0.0130138		0.0102244			NaN	2	2	2	8.7	34.867	0	6.1487	64882000	9	F9X3I5
F9X3I9	21.9225	21.0618	21.6185	21.4272	NaN	NaN	0.107044		0			NaN	1	1	1	5	26.581	0.0025478	2.0952	15959000	2	F9X3I9
F9X3K9	25.2395	25.322	25.0764	25.6358	25.4355	25.3065	-0.246639		0.96314			NaN	1	1	1	10.3	10.636	0	2.4498	854280000	11	F9X3K9
F9X3L8	22.2328	21.82	22.2793	22.2407	22.0374	20.9397	0.371439		0.360474			NaN	2	2	2	8.9	31.174	0	4.143	36539000	4	F9X3L8
F9X3M4	NaN	NaN	21.9089	21.4964	21.1577	20.826	0.748869		0			NaN	2	2	2	4.8	37.248	0.0058411	1.6709	20989000	2	F9X3M4
F9X3M7	24.2936	24.4418	24.6034	24.2259	24.2882	24.2372	0.195822		1.00414			NaN	3	3	3	10.4	39.433	0	92.541	194670000	8	F9X3M7
F9X3N6	22.4895	22.3959	22.3802	22.6904	22.7883	22.6119	-0.275029		1.95865			NaN	4	4	4	16	39.919	0	3.3914	52227000	4	F9X3N6
F9X3P5	24.2889	23.7391	24.0909	23.4211	23.418	23.3968	0.627673		1.75591			NaN	3	3	3	24	22.878	0	12.513	130590000	10	F9X3P5
F9X3Q8	25.2452	24.8055	25.2559	24.3587	25.2383	24.6355	0.35802		0.526685			NaN	3	3	3	33.8	22.841	0	25.684	313070000	22	F9X3Q8
F9X3U4	24.1304	25.8677	25.0996	23.7325	24.4308	24.5214	0.80433		0.647863	+	+	0.980992	4	4	4	36.8	19.763	0	12.014	261320000	6	F9X3U4
F9X3X9	18.9139	21.0497	21.7343	21.7807	22.2854	23.3002	-1.88946		0.919593			NaN	6	6	6	9.2	124.16	0	6.0704	81650000	9	F9X3X9
F9X3Y2	24.6399	24.4948	24.5521	24.9562	23.567	25.0931	0.0235291		0.0159443			NaN	3	3	3	24.9	37.598	0	92.986	252680000	20	F9X3Y2
F9X3Y6	26.0749	27.3695	26.1447	26.8374	27.0072	27.1637	-0.47307		0.476502	+		-0.98504	11	11	11	40.4	46.944	0	117.95	1351400000	93	F9X3Y6
F9X3Z2	24.9583	23.1677	26.5152	24.6086	25.5064	26.0495	-0.507732		0.183555			NaN	4	4	4	32.3	14.823	0	323.31	555420000	27	F9X3Z2
F9X3Z3	27.6672	27.8622	26.9539	27.2284	27.6276	27.604	0.00782013		0.00843574			NaN	7	7	7	68	19.004	0	307.65	1864900000	54	F9X3Z3
F9X3Z9	21.5166	21.4069	21.6266	21.7608	21.2703	21.3243	0.0649064		0.143576			NaN	1	1	1	0.7	138.15	0.0097826	1.2738	25329000	1	F9X3Z9
F9X410	22.5601	21.8375	21.722	20.4657	22.7323	22.3053	0.205463		0.0991508			NaN	1	1	1	16.3	17.862	0.0078212	1.367	39301000	5	F9X410
F9X421	24.436	25.0309	24.6542	25.1213	24.4104	25.085	-0.165223		0.223055			NaN	7	7	7	48.4	38.496	0	73.189	386520000	30	F9X421
F9X431	25.8222	24.9045	25.2691	24.9477	24.6541	25.1678	0.40873		0.59882			NaN	5	5	5	28.6	27.042	0	26.996	355660000	24	F9X431
F9X432	25.9242	25.7706	26.0751	25.6736	25.5213	25.9016	0.224459		0.727956			NaN	12	12	12	23.5	98.553	0	37.381	552340000	49	F9X432
F9X437	24.4093	23.9761	24.6547	23.4245	23.709	23.8326	0.691356		1.38848			NaN	5	5	5	14.9	57.037	0	27.519	164620000	9	F9X437
F9X441	25.379	26.1498	24.332	26.1148	25.7568	26.0133	-0.67468		0.556442			NaN	2	2	2	16.1	16.07	0	26.507	546420000	15	F9X441
F9X4B2	25.9179	26.9205	25.3722	26.7595	26.8103	27.3754	-0.911554		0.856843			NaN	6	6	6	31.5	39.619	0	134.51	1043200000	38	F9X4B2
F9X4B4	20.8917	20.1909	21.3217	20.9574	21.1502	20.7018	-0.134994		0.141158			NaN	2	2	2	7.7	30.973	0	3.3208	18633000	3	F9X4B4
F9X4B7	29.2978	28.6336	28.6296	28.9721	28.9154	27.4276	0.415293		0.306363			NaN	4	4	4	29	15.009	0	127.95	6247200000	90	F9X4B7
F9X4C5	26.5948	26.7261	27.2248	27.0205	26.8053	26.8229	-0.0343151		0.0582203			NaN	19	19	19	37.5	90.049	0	186.75	1089700000	81	F9X4C5
F9X4D9	22.5395	21.9724	22.662	21.7295	21.8816	21.4635	0.699779		1.33603			NaN	2	2	2	9.3	29.071	0	9.6552	39542000	4	F9X4D9
F9X4F7	23.3141	24.7058	25.4357	25.0449	25.0836	25.1208	-0.597895		0.407441			NaN	6	6	6	48.3	16.116	0	43.384	395950000	33	F9X4F7
F9X4H2	25.023	25.3502	25.575	25.5866	25.4298	25.613	-0.227051		0.596974			NaN	8	8	8	31.2	46.269	0	35.118	426050000	33	F9X4H2
F9X4H5	22.4752	23.7176	23.9953	23.5446	23.0741	23.3811	0.0627797		0.0439745			NaN	3	3	3	11.6	39.057	0	4.9154	124560000	7	F9X4H5
F9X4J7	NaN	21.8021	NaN	21.1716	20.5397	21.272	0.807693		0			NaN	4	4	4	9.7	62.128	0	4.8379	29670000	6	F9X4J7
F9X4J8	NaN	NaN	22.0151	21.3857	21.6993	21.6465	0.437907		0			NaN	3	3	3	5.5	81.534	0	11.378	20815000	4	F9X4J8
F9X4K1	26.0834	25.4154	25.9553	25.3132	25.1533	24.7325	0.751694		1.31314			NaN	6	6	6	27.2	30.072	0	85.177	481000000	32	F9X4K1
F9X4L1	25.7776	24.6773	26.903	26.388	26.729	26.3937	-0.71759		0.477479			NaN	4	4	4	26.5	17.853	0	120.42	882160000	22	F9X4L1
F9X4M1	23.9684	24.53	23.747	24.1586	24.3673	24.223	-0.167818		0.28011			NaN	6	6	6	12.2	85.568	0	7.2611	178860000	16	F9X4M1
F9X4N1	22.4459	22.2888	22.8843	22.5101	22.1701	22.8126	0.0420876		0.0565141			NaN	2	2	2	4.4	108.37	0	25.55	58292000	9	F9X4N1
F9X4N3	21.0048	21.0259	21.4178	21.151	21.2974	20.8167	0.0611273		0.113346			NaN	2	2	2	3.1	84.132	0.0025253	2.0355	22622000	3	F9X4N3
F9X4P3	29.8694	30.2782	29.6965	30.065	30.1947	30.0921	-0.169252		0.405637			NaN	30	30	30	48.5	93.775	0	323.31	11322000000	286	F9X4P3
F9X4P7	NaN	25.3408	NaN	27.2654	27.4013	25.5544	-1.39962		0			NaN	1	1	1	6	27.977	0.0036145	1.829	476480000	3	F9X4P7
F9X4S9	21.7309	22.3602	NaN	22.0548	21.9606	21.6365	0.161621		0.213671			NaN	1	1	1	8	34.911	0.0087623	1.3039	37751000	2	F9X4S9
F9X4T2	23.1889	23.251	23.0527	23.6764	23.5124	22.7913	-0.162473		0.228829			NaN	3	3	3	8.2	54.936	0	4.4159	89452000	12	F9X4T2
F9X4T9	25.1797	26.4386	26.0876	26.1377	26.2481	26.2962	-0.325363		0.358616			NaN	8	8	8	52	33.875	0	85.147	738030000	45	F9X4T9
F9X4U4	22.1637	22.1437	22.2679	21.7411	22.0191	21.9757	0.279778		1.38102			NaN	3	3	3	3.9	134.88	0	20.127	40221000	6	F9X4U4
F9X4W8	23.7634	23.7138	22.2373	23.5497	23.5736	23.0209	-0.143213		0.0962866			NaN	3	3	3	17.3	40.907	0	17.133	103370000	14	F9X4W8
F9X4X0	27.7119	28.2829	27.6267	27.6826	27.8687	28.0502	0.00663439		0.00942532			NaN	26	26	26	75.5	55.232	0	323.31	3768200000	189	F9X4X0
F9X4Y7	26.0382	25.1477	25.7476	25.0635	25.5221	25.0786	0.423077		0.630457			NaN	7	7	7	18.9	54.677	0	20.559	437270000	37	F9X4Y7
F9X514	26.5908	25.6628	26.6294	26.1135	26.1439	25.1194	0.502063		0.471191			NaN	10	10	10	38.4	42.013	0	46.467	743250000	32	F9X514
F9X524	24.291	23.9741	23.9261	24.002	23.8001	23.6137	0.258497		0.739934			NaN	3	3	3	9.6	41.294	0	17.881	142010000	17	F9X524
F9X552	24.074	23.5603	23.4054	23.1262	23.077	23.0389	0.599194		1.37382			NaN	2	2	2	5.9	63.448	0	17.211	98633000	8	F9X552
F9X554	22.397	21.8306	22.6354	21.7034	22.3896	21.8067	0.321097		0.428478			NaN	2	2	2	10.9	22.426	0	7.0782	37343000	6	F9X554
F9X5D9	25.3399	24.0647	24.8904	23.8908	24.3861	23.7282	0.763323		0.838121			NaN	7	7	7	25.6	64.927	0	26.503	222110000	22	F9X5D9
F9X5F9	26.5397	26.4539	26.5896	26.2377	26.9316	26.4374	-0.00780296		0.0122709			NaN	23	23	23	20.3	204.76	0	54.843	1469900000	69	F9X5F9
F9X5G0	25.7702	25.8391	25.4552	25.7123	26.0177	25.8423	-0.169298		0.501103			NaN	18	18	18	14.6	233.28	0	58.239	545000000	49	F9X5G0
F9X5L0	23.1357	22.8954	22.8813	21.9541	NaN	21.3783	1.3046		1.9147			NaN	2	2	2	4.2	64.936	0	3.6432	43337000	4	F9X5L0
F9X5M5	25.6253	24.9601	25.7537	25.16	25.2581	25.0894	0.277192		0.480207			NaN	1	1	1	19.6	10.122	0	45.896	395090000	36	F9X5M5
F9X5P1	20.8341	NaN	21.4678	21.1911	21.3524	20.9459	-0.0121253		0.0139864			NaN	2	2	2	4.7	69.464	0	2.7512	16856000	2	F9X5P1
F9X5P7	24.6854	24.0428	24.334	24.5155	24.5286	24.0876	-0.0231355		0.0331548			NaN	2	2	2	2	137.51	0	2.4127	202790000	6	F9X5P7
F9X5Q6	24.2264	23.0661	23.5299	23.4452	23.3384	23.1137	0.308399		0.367272			NaN	1	1	1	1	259.26	0.0077008	1.3252	112850000	3	F9X5Q6
F9X5R3	23.3655	23.0194	NaN	23.4157	23.7583	23.2144	-0.27037		0.461459			NaN	1	1	1	2.7	45.536	0	3.1061	91568000	6	F9X5R3
F9X5R9	21.8978	23.651	NaN	25.0066	23.9637	22.44	-1.02903		0.355147			NaN	1	1	1	7	39.961	0	6.3113	103810000	5	F9X5R9
F9X5S6	24.7818	24.559	24.9636	23.9757	24.2794	24.079	0.656776		1.95401			NaN	4	4	4	19.6	36.051	0	113.57	230350000	25	F9X5S6
F9X5S9	24.5401	24.0112	24.6167	24.1694	23.5995	23.9031	0.498681		0.925845			NaN	2	2	2	7.3	54.314	0	3.7352	163520000	12	F9X5S9
F9X5T1	23.3803	22.7299	22.464	22.7008	23.4879	23.0344	-0.216263		0.240019			NaN	3	3	3	11.2	30.397	0	4.2181	76313000	8	F9X5T1
F9X5T5	25.2466	25.0502	25.2244	25.0213	25.1757	24.9428	0.127127		0.618315			NaN	8	8	8	27.3	63.399	0	65.162	342450000	25	F9X5T5
F9X612	24.5482	24.031	24.78	23.7935	24.2889	23.9621	0.438204		0.760919			NaN	4	4	4	15.2	68.101	0	11.131	170220000	14	F9X612
F9X618	24.9483	24.3595	24.5059	21.0475	22.2574	21.5117	2.99908	+	2.7947	+	+	0.989678	5	5	5	12.3	81.834	0	14.381	122810000	13	F9X618
F9X640	25.2204	25.258	24.9509	24.6003	24.9676	24.056	0.601817		1.00138			NaN	3	3	3	13.7	39.526	0	68.524	299270000	15	F9X640
F9X645	27.0243	26.9649	26.9544	26.8071	27.0736	26.8271	0.0785993		0.37242			NaN	12	12	12	23.6	82.517	0	123.77	1294300000	76	F9X645
F9X6A6	27.3185	27.4754	27.0412	27.2612	27.6012	27.0569	-0.0280749		0.0472992			NaN	10	10	10	62.5	36.2	0	203.44	1762200000	58	F9X6A6
F9X6D0	20.423	19.9292	21.8997	21.6405	21.2044	21.3741	-0.655747		0.468952			NaN	2	2	2	7	38.539	0.0013228	2.3406	21999000	5	F9X6D0
F9X6E3	20.6747	19.5356	21.2354	20.6373	21.0287	20.3888	-0.203025		0.140894			NaN	1	1	1	2.5	57.615	0	2.473	14003000	7	F9X6E3
F9X6J0	20.8727	20.613	20.9766	20.6996	20.8352	19.9597	0.322605		0.478422			NaN	1	1	1	3.4	53.216	0	2.3603	14406000	3	F9X6J0
F9X6L0	23.8027	23.7607	23.5588	23.241	23.709	23.3163	0.285314		0.807252			NaN	5	5	5	10.3	82.926	0	9.901	116430000	18	F9X6L0
F9X6M9	25.5386	25.0471	25.7644	24.9964	24.7489	24.591	0.671298		1.29786			NaN	10	10	10	17.7	115.53	0	29.416	380020000	22	F9X6M9
F9X6N5	25.1266	24.6293	24.852	24.5889	24.5509	24.1266	0.447185		1.01646			NaN	7	7	7	21.3	75.845	0	94.506	226400000	27	F9X6N5
F9X6N6	21.3446	21.4385	21.2211	21.7128	21.7362	21.4825	-0.309128		1.40464			NaN	1	1	1	4.7	55.105	0	3.3203	26024000	1	F9X6N6
F9X6P5	24.7179	25.3724	25.2049	25.0585	25.117	25.1133	0.00211461		0.00350684			NaN	9	9	9	37.4	40.584	0	63.833	338120000	28	F9X6P5
F9X6P7	25.0008	25.5272	24.8133	24.6516	24.8466	24.646	0.399032		0.827018			NaN	8	8	8	24.9	64.686	0	95.78	286520000	25	F9X6P7
F9X6S0	22.7021	22.6936	23.1599	23.0147	23.1874	23.0312	-0.225878		0.620807			NaN	2	2	2	4.6	63.469	0.0024938	1.9847	82971000	3	F9X6S0
F9X6T7	24.994	25.3566	24.8516	24.9906	25.4083	25.1133	-0.103289		0.204746			NaN	6	6	6	16	56.281	0	139.27	352790000	17	F9X6T7
F9X6V2	23.7505	22.9339	24.1434	23.362	23.4091	23.0746	0.327354		0.368853			NaN	5	5	5	15.7	54.466	0	32.885	148040000	12	F9X6V2
F9X6W9	25.5611	25.6827	26.2459	26.3661	26.2113	25.6369	-0.241484		0.323964			NaN	10	10	10	30.2	48.062	0	60.288	630220000	41	F9X6W9
F9X6X2	23.0584	NaN	NaN	22.2737	22.5083	23.0604	0.444302		0			NaN	1	1	1	7.7	33.928	0.0025157	2.0225	32043000	2	F9X6X2
F9X6X9	22.9254	22.7105	22.776	22.4456	22.4933	22.5539	0.306349		1.90575			NaN	3	3	3	5.9	43.323	0	3.7934	31998000	7	F9X6X9
F9X6Y2	23.8703	23.5826	23.7536	23.4774	23.574	23.8354	0.106547		0.322164			NaN	3	3	3	9.9	72.288	0	4.7428	131010000	4	F9X6Y2
F9X710	24.9671	25.0177	24.6842	25.3655	25.3328	24.5862	-0.205133		0.30372			NaN	4	4	4	26.3	26.884	0	48.825	310420000	18	F9X710
F9X713	23.7098	23.1095	23.5223	23.077	22.9175	22.606	0.580344		1.21265			NaN	4	4	4	9.3	64.755	0	26.366	85888000	19	F9X713
F9X732	25.6009	25.9716	25.4712	25.6998	25.6984	25.9344	-0.0963504		0.222161			NaN	16	16	16	28.7	118.29	0	33.97	557840000	48	F9X732
F9X758	24.3474	24.6935	24.1865	23.9629	24.6037	23.6679	0.330998		0.454121			NaN	3	3	3	15.5	49.801	0	22.427	212870000	27	F9X758
F9X772	20.3836	19.9495	20.7367	20.7782	20.8674	20.0284	-0.201385		0.224746			NaN	2	2	2	1.1	205.21	0.002451	1.9001	12235000	5	F9X772
F9X773	21.1256	23.0671	24.2309	23.4836	22.6946	22.5988	-0.117816		0.0423435			NaN	4	4	4	16.6	29.768	0	7.7181	103660000	6	F9X773
F9X786	26.4034	27.633	26.4241	27.2743	27.401	27.4183	-0.544345		0.595179			NaN	12	12	12	57.7	39.794	0	197.93	1610200000	71	F9X786
F9X799	28.4743	27.8177	28.2871	28.6036	28.2565	27.2389	0.160002		0.129523			NaN	8	8	8	30.9	25.345	0	323.31	3000400000	78	F9X799
F9X7A5	24.9806	25.5124	25.6012	25.0714	25.6075	25.7965	-0.127105		0.164394			NaN	5	5	5	17.3	42.969	0	79.974	421210000	29	F9X7A5
F9X7A8	22.6969	23.0061	23.043	22.7085	23.2431	22.8212	-0.00893339		0.01508			NaN	4	4	4	16.9	50.924	0	8.187	67115000	5	F9X7A8
F9X7B1	25.2366	25.2866	25.2655	25.1643	25.3544	25.0284	0.0805225		0.349476			NaN	11	11	11	16.8	97.708	0	59.444	371380000	28	F9X7B1
F9X7C4	27.0207	26.8767	26.3852	26.746	26.7219	26.9	-0.028436		0.0486805			NaN	8	8	8	38	31.62	0	22.211	1228200000	47	F9X7C4
F9X7H3	30.3467	30.3736	30.1593	30.5062	31.0607	31.2021	-0.629807		1.32326			NaN	31	31	31	58.3	78.856	0	323.31	19212000000	544	F9X7H3
F9X7H9	21.3849	21.1458	21.5823	21.007	21.185	20.4415	0.493223		0.894074			NaN	1	1	1	3.2	56.744	0	2.7841	19769000	4	F9X7H9
F9X7I9	23.2012	23.3945	22.4852	23.6748	23.061	23.0672	-0.240641		0.282253			NaN	3	3	3	13.5	44.381	0	12.177	101910000	7	F9X7I9
F9X7J9	23.5026	23.4103	23.7242	23.3423	23.5314	23.2929	0.156847		0.593477			NaN	5	5	5	5.8	119.4	0	8.8398	104820000	14	F9X7J9
F9X7K9	24.1536	25.0155	25.147	25.0792	25.0468	25.0707	-0.293589		0.398431			NaN	11	11	11	17.5	97.806	0	92.241	316020000	34	F9X7K9
F9X7L4	27.7072	27.6418	27.7354	27.3133	27.4997	27.76	0.170473		0.572635			NaN	13	13	13	55.9	35.781	0	189.24	2925400000	91	F9X7L4
F9X7R1	21.7221	22.8024	22.6494	22.8686	22.3841	22.7473	-0.275344		0.305011			NaN	6	6	6	10.8	97.84	0	9.6834	62603000	11	F9X7R1
F9X7S7	22.0769	20.8603	22.1402	NaN	21.957	21.7084	-0.140265		0.089518			NaN	2	2	2	6.5	66.113	0	5.8998	27090000	3	F9X7S7
F9X7U6	21.8592	22.0767	22.3916	22.1847	22.0937	21.9295	0.0398528		0.0820784			NaN	3	3	3	6.1	68.043	0	4.0285	38892000	9	F9X7U6
F9X7V7	23.4649	23.229	23.3166	23.2137	23.146	22.6026	0.349391		0.785176			NaN	5	5	5	12.5	59.944	0	10.278	84342000	12	F9X7V7
F9X7Y0	32.1911	32.2837	31.6643	32.4597	33.0016	33.067	-0.796391		1.36535			NaN	98	98	98	59.9	251.83	0	323.31	68610000000	1219	F9X7Y0
F9X7Z3	25.0693	25.4453	24.7071	24.6008	25.126	25.0475	0.149117		0.21578			NaN	9	9	9	32.5	46.952	0	23.084	335430000	24	F9X7Z3
F9X7Z4	21.8084	21.7849	22.1863	20.9426	21.258	20.5326	1.01546		1.83207			NaN	1	1	1	3.9	33.576	0	3.7453	26745000	6	F9X7Z4
F9X7Z8	25.038	24.598	24.5921	24.5788	24.707	24.5033	0.146382		0.387359			NaN	4	4	4	20.5	32.592	0	84.975	258250000	20	F9X7Z8
F9X7Z9	NaN	21.9162	21.9243	21.3023	22.3905	22.2281	-0.0533772		0.0406621			NaN	2	2	2	14.2	24.343	0.002442	1.8909	33648000	4	F9X7Z9
F9X855	20.3285	NaN	21.7019	20.7637	20.8146	20.9235	0.181283		0.125912			NaN	2	2	2	2.2	60.984	0	2.8363	14585000	2	F9X855
F9X873	24.9545	23.6537	25.0693	25.1745	24.8804	25.7627	-0.713387		0.612372			NaN	3	3	3	7.7	61.926	0	24.774	481270000	19	F9X873
F9X877	26.474	25.6768	26.2672	23.3359	23.6734	23.5698	2.61298	+	3.26609	+	+	0.990085	6	6	6	55.2	23.222	0	50.576	335940000	27	F9X877
F9X878	22.6267	22.454	21.8906	21.7666	22.1332	22.0116	0.353319		0.646217			NaN	2	2	2	7.3	62.322	0	2.5663	42968000	3	F9X878
F9X880	23.1187	22.4672	23.6727	22.671	23.0652	22.4516	0.35692		0.383029			NaN	5	5	5	36	27.177	0	12.117	68782000	14	F9X880
F9X887	23.208	23.1432	23.4009	23.1049	23.2359	23.5279	-0.0388686		0.0944247			NaN	3	3	3	9.8	58.919	0	11.763	91524000	8	F9X887
F9X892	22.6401	22.9519	21.8352	21.6934	22.7127	23.0072	0.00461896		0.00290999			NaN	2	2	2	26.2	11.918	0	11.416	58790000	7	F9X892
F9X8B2	24.1537	23.3058	24.3653	23.5749	23.2798	23.0739	0.632044		0.8254			NaN	2	2	2	11.5	37.556	0	11.275	126600000	8	F9X8B2
F9X8G5	22.2689	21.9699	22.6575	21.4209	20.9807	23.173	0.440572		0.249905			NaN	2	2	2	10.7	36.848	0	10.114	54688000	4	F9X8G5
F9X8I8	NaN	NaN	19.8497	19.8998	21.2608	18.2889	0.0331841		0			NaN	1	1	1	6.1	46.049	0.0077519	1.3396	4697300	1	F9X8I8
F9X8J5	NaN	NaN	NaN	NaN	NaN	NaN	NaN		0			NaN	3	3	3	3.7	247.9	0.0025575	2.1084	209020000	2	F9X8J5
F9X8K4	25.7179	25.1096	25.6681	24.6753	25.0886	24.8345	0.632403		1.29376			NaN	5	5	5	38	22.107	0	70.868	342100000	25	F9X8K4
F9X8L4	23.5127	22.7347	24.1695	22.6985	23.2438	23.5895	0.29501		0.237375			NaN	3	3	3	12.3	67.591	0	4.2069	110940000	7	F9X8L4
F9X8M7	24.442	24.1493	24.285	23.5843	24.3789	24.0428	0.290107		0.51925			NaN	6	6	6	21	54.232	0	12.167	176670000	21	F9X8M7
F9X8N9	22.6632	22.5879	22.0363	21.8813	22.9501	22.4658	-0.00327301		0.00291621			NaN	4	4	4	14.1	38.443	0	11.13	57094000	6	F9X8N9
F9X8P1	23.7618	24.6217	22.9758	24.4756	24.2384	24.1736	-0.509415		0.453448			NaN	4	4	4	30.5	28.553	0	32.711	181620000	21	F9X8P1
F9X8P7	23.747	23.4542	23.4273	23.2049	22.8778	23.407	0.37962		0.96031			NaN	6	6	6	17.1	62.64	0	85.108	102000000	14	F9X8P7
F9X8Q4	24.8344	22.8922	24.714	23.5071	22.5419	23.7233	0.889437		0.54127			NaN	3	3	3	29.4	23.022	0	32.961	143620000	14	F9X8Q4
F9X8Q8	21.3507	20.4959	20.7274	NaN	NaN	NaN	NaN		0			NaN	2	2	2	5.1	77.123	0	12.894	11716000	5	F9X8Q8
F9X8R6	NaN	21.8634	22.1554	22.7011	22.2582	NaN	-0.470205		0.661007			NaN	NaN	NaN	NaN	5.9	NaN	NaN	NaN	NaN	NaN	F9X8R6
F9X8R8	26.2934	26.0047	26.6088	25.9649	25.8817	25.7955	0.421595		1.09416	+		-0.965976	12	12	12	38.5	58.01	0	164.25	788190000	47	F9X8R8
F9X8S5	24.0609	23.8891	24.7888	24.5988	24.2604	23.9591	-0.0265058		0.0267845			NaN	7	7	7	15.1	78.214	0	12.843	187810000	11	F9X8S5
F9X8T9	NaN	25.9048	26.3128	25.5915	26.5922	26.0972	0.0151669		0.0121877			NaN	2	2	2	11.4	51.341	0.0036101	1.8247	1251700000	4	F9X8T9
F9X8V1	NaN	22.2973	21.3047	21.6839	21.9173	21.3373	0.154845		0.129519			NaN	4	4	4	7.3	77.239	0	10.78	44670000	4	F9X8V1
F9X8V9	24.2275	23.9575	23.7685	23.879	24.3038	24.1582	-0.129178		0.285765			NaN	6	6	6	19	69.123	0	13.457	174910000	22	F9X8V9
F9X8W0	24.0089	23.3097	24.3924	24.2778	23.6532	23.3943	0.128562		0.113362			NaN	6	6	6	20.4	67.734	0	6.9534	134790000	8	F9X8W0
F9X8W2	25.39	24.9442	25.0912	NaN	23.9159	23.8786	1.24455	+	2.27934	+	+	0.939722	4	4	4	9.2	64.241	0	109.03	158170000	6	F9X8W2
F9X8X8	31.4649	31.4184	21.8578	31.7466	31.8973	31.5228	-3.4752		0.470983			NaN	1	1	1	3.1	61.038	0.0078918	1.3944	45587000000	68	F9X8X8
F9X8Y0	23.5267	23.3628	23.1314	22.9635	23.3707	22.7431	0.314574		0.657279			NaN	4	4	4	9.5	47.908	0	6.9989	129660000	10	F9X8Y0
F9X922	25.4313	25.8145	25.592	26.5139	26.8078	25.0405	-0.508169		0.383103			NaN	8	8	8	48.1	17.896	0	177.09	1171400000	55	F9X922
F9X930	29.0213	28.7411	28.8812	28.358	28.836	28.5828	0.288921		0.837675			NaN	14	14	14	28.9	79.266	0	323.31	4213700000	101	F9X930
F9X956	23.9885	23.1136	23.5457	22.397	22.5991	22.6814	0.990074		1.68775			NaN	6	6	6	7	140.29	0	14.225	68501000	9	F9X956
F9X964	23.1719	23.3361	23.2141	22.7255	23.4799	22.8555	0.22039		0.390603			NaN	1	1	1	5.5	41.041	0.0057803	1.6107	82017000	8	F9X964
F9X9B9	22.4082	22.3994	22.3003	23.5493	21.9235	23.197	-0.520636		0.453132			NaN	3	3	3	9	62.181	0	5.6411	58755000	4	F9X9B9
F9X9C0	22.5896	21.9583	22.3902	21.7696	21.8193	21.3226	0.67556		1.2963			NaN	3	3	3	10.7	52.919	0	5.4455	49169000	4	F9X9C0
F9X9C1	25.4035	25.1279	25.3263	25.0889	25.2067	25.3044	0.0858733		0.345267			NaN	13	13	13	35.1	68.037	0	96.097	413240000	41	F9X9C1
F9X9D0	24.9043	24.1784	24.4664	23.8784	24.1102	24.3213	0.413059		0.770909			NaN	5	5	5	19	59.577	0	32.875	171500000	13	F9X9D0
F9X9E4	23.4687	23.4442	23.2242	23.9423	23.7758	23.7803	-0.453744		2.0543			NaN	2	2	2	12.3	19.326	0	14.252	123330000	11	F9X9E4
F9X9E7	NaN	22.5592	NaN	22.4131	22.634	22.7514	-0.0402584		0			NaN	1	1	1	15.3	46.287	0	17.559	43271000	3	F9X9E7
F9X9G6	29.0525	29.1542	28.8058	28.8477	28.8862	28.669	0.203189		0.758385			NaN	12	12	12	62	34.998	0	138.58	4966100000	147	F9X9G6
F9X9J4	25.3242	25.7018	24.9431	25.2806	25.6598	25.536	-0.169066		0.276206			NaN	12	12	12	17.5	138.32	0	80.714	455110000	45	F9X9J4
F9X9J9	24.1041	24.1759	24.8506	23.6281	23.7084	NaN	0.708561		0.977799			NaN	3	3	3	13.3	34.421	0	18.816	135000000	5	F9X9J9
F9X9K6	25.9658	26.1667	25.4992	26.1275	26.1716	25.8076	-0.158354		0.278583			NaN	8	8	8	29.6	71.322	0	37.544	206470000	25	F9X9K6
F9X9M4	28.0575	27.7783	28.2963	27.0387	27.6341	27.3991	0.686755		1.39886			NaN	12	12	12	25.1	121.94	0	92.53	591960000	40	F9X9M4
F9X9Q3	23.605	24.3846	23.9366	24.2811	24.7986	24.307	-0.486832		0.798545			NaN	5	5	5	30.2	32.074	0	9.0253	177140000	19	F9X9Q3
F9X9R0	29.3466	30.6316	29.7614	29.8931	30.5253	30.4915	-0.390149		0.380618	+		-0.978095	15	15	15	50.3	49.726	0	323.31	14350000000	330	F9X9R0
F9X9S8	24.0466	23.3307	23.618	23.5	23.6808	22.5049	0.436561		0.446211			NaN	1	1	1	5.4	86.912	0	6.3119	98601000	5	F9X9S8
F9X9U6	23.4593	22.7591	23.5628	23.6165	23.4311	22.7214	0.00405375		0.00356749			NaN	2	2	2	9.1	30.745	0	5.9242	89073000	12	F9X9U6
F9X9V1	25.5682	26.3872	25.8928	25.3684	24.6013	26.4727	0.468601		0.324564			NaN	6	6	6	2.4	492.98	0	4.0468	1536300000	24	F9X9V1
F9X9V7	22.4682	22.2723	22.4391	22.5324	22.5155	22.3531	-0.0737604		0.369076			NaN	2	2	2	4.6	53.571	0	3.1996	52435000	7	F9X9V7
F9X9Y0	23.5934	22.643	22.8383	22.4462	22.754	22.5299	0.448206		0.668721			NaN	5	5	5	10.8	95.602	0	8.0286	73434000	12	F9X9Y0
F9X9Y7	25.1701	24.4193	25.6397	25.6032	25.334	24.5847	-0.0975895		0.0731119			NaN	2	2	2	7.9	44.057	0	2.9843	309660000	6	F9X9Y7
F9X9Z1	23.6479	22.9653	23.3906	23.5893	23.9016	23.3875	-0.291524		0.513418			NaN	5	5	5	14.7	58.442	0	13.804	107500000	16	F9X9Z1
F9X9Z3	NaN	23.4397	23.8372	23.884	23.7487	23.947	-0.221415		0.56049			NaN	2	2	2	2.9	55.956	0.0059737	1.7468	112990000	1	F9X9Z3
F9X9Z4	26.3398	26.9568	26.3861	26.9836	26.6209	26.6799	-0.200536		0.367745			NaN	8	8	8	42.9	24.929	0	81.633	1282700000	56	F9X9Z4
F9XA00	20.629	20.1048	20.9945	NaN	NaN	19.8254	0.750729		0			NaN	1	1	1	1.3	100.3	0	3.5283	9835500	3	F9XA00
F9XA20	29.5385	28.1154	30.0497	27.023	27.0339	26.5929	2.35129	+	1.77089	+	+	0.990214	6	6	6	45.9	21.926	0	323.31	2932900000	94	F9XA20
F9XA30	24.22	24.2304	24.124	23.7994	23.8097	23.2254	0.579974		1.38083			NaN	2	2	2	4.7	54.213	0	4.0558	139770000	14	F9XA30
F9XA48	23.3802	23.8642	23.2166	23.159	23.7311	23.4939	0.0256914		0.0339647			NaN	5	5	5	9.9	98.238	0	6.119	103770000	10	F9XA48
F9XA49	21.3972	21.586	21.6682	20.1682	20.9841	21.236	0.754371		1.06758			NaN	1	1	1	3.2	62.783	0.0067797	1.4099	21544000	4	F9XA49
F9XA60	NaN	22.4088	NaN	22.5316	22.6545	22.541	-0.166865		0			NaN	3	3	3	13.6	36.699	0	5.3731	54888000	7	F9XA60
F9XA69	26.0988	26.3244	26.5125	27.2794	26.1331	27.1685	-0.548452		0.644906			NaN	5	5	5	27	27.738	0	217.82	1344000000	49	F9XA69
F9XA70	21.3232	21.0523	21.3888	20.9546	21.0369	20.6982	0.358186		1.1621			NaN	2	2	2	4.7	34.745	0	4.5972	22168000	5	F9XA70
F9XA78	27.4338	28.1621	27.873	29.4557	28.759	28.3965	-1.04743		1.30491			NaN	2	2	2	4.6	73.49	0.0058962	1.7	3591200000	5	F9XA78
F9XA81	26.226	26.1591	26.3208	26.0931	26.0265	25.8959	0.230118		1.43578			NaN	9	9	9	36.5	49.182	0	41.666	679620000	39	F9XA81
F9XA86	24.2593	23.9703	23.6702	24.201	23.8797	23.5088	0.10342		0.146485			NaN	7	7	7	24.7	38.513	0	15.125	179700000	23	F9XA86
F9XAA2	NaN	20.9391	21.1516	20.9514	20.6848	20.9199	0.193269		0.609074			NaN	2	2	2	7.9	60.543	0.0012987	2.1976	14603000	2	F9XAA2
F9XAA9	24.2579	24.3529	24.3931	24.3728	24.4052	24.5699	-0.114655		0.717853			NaN	6	6	6	17.5	58.184	0	13.418	176050000	14	F9XAA9
F9XAB1	21.233	20.9613	21.253	21.4194	21.4591	20.9825	-0.137871		0.31436			NaN	1	1	1	4.7	52.353	0.001297	2.1753	19608000	6	F9XAB1
F9XAB4	20.1375	19.8547	22.1023	20.2172	21.595	20.4811	-0.0662498		0.0269973	+		-0.984085	1	1	1	3.6	42.93	0	2.7774	17131000	2	F9XAB4
F9XAD1	NaN	21.9717	NaN	21.2078	21.858	21.1839	0.555147		0			NaN	2	2	2	24	30.088	0	6.1879	25409000	5	F9XAD1
F9XAE8	25.6373	25.1838	26.0501	24.9401	25.1479	25.254	0.509697		0.891181			NaN	8	8	8	34.4	52.107	0	55.845	378000000	27	F9XAE8
F9XAF0	21.2218	20.9957	21.0119	NaN	21.0983	21.0642	-0.00477918		0.016385			NaN	2	2	2	6.4	56.976	0	2.6401	18737000	3	F9XAF0
F9XAG4	24.652	24.1034	23.971	23.3561	24.457	24.1162	0.265711		0.276116			NaN	4	4	4	8.2	69.194	0	5.832	205310000	18	F9XAG4
F9XAG6	NaN	22.7836	NaN	20.4954	22.2847	22.5934	0.992411		0			NaN	1	1	1	16	19.526	0	17.317	37375000	4	F9XAG6
F9XAG9	22.5771	22.7447	22.5741	23.5459	23.1194	23.1896	-0.65302		1.9818			NaN	3	3	3	26.7	16.861	0	3.6333	92562000	3	F9XAG9
F9XAH2	21.8408	21.5888	21.786	21.5782	20.8919	21.1606	0.528333		1.16187			NaN	1	1	1	5.1	43.879	0.0097087	1.2527	26978000	5	F9XAH2
F9XAQ3	NaN	21.8263	NaN	21.7451	22.0013	22.1708	-0.14609		0			NaN	2	2	2	5.1	88.783	0	2.4878	28017000	2	F9XAQ3
F9XAQ4	22.0682	22.6158	22.0153	21.6411	NaN	21.4541	0.685507		1.11841			NaN	1	1	1	5	33.794	0.0059102	1.7053	35381000	1	F9XAQ4
F9XAQ5	29.3007	29.5966	28.9414	29.6983	29.12	28.9751	0.0151043		0.0172347			NaN	12	12	12	47.6	28.709	0	233.5	7444100000	111	F9XAQ5
F9XAQ8	28.7529	28.2513	28.7254	27.7776	28.0151	27.5141	0.807613		1.68425			NaN	9	9	9	47.2	28.814	0	91.573	2863400000	78	F9XAQ8
F9XAR5	25.9361	25.4995	25.8294	25.965	25.5727	25.6839	0.0144355		0.0275739			NaN	7	7	7	23	51.533	0	36.902	589280000	34	F9XAR5
F9XAR6	23.1503	22.1911	25.6637	25.8041	25.183	24.4654	-1.48247		0.600463			NaN	2	2	2	13.4	17.507	0	10.431	314060000	8	F9XAR6
F9XAR7	24.6893	24.9138	25.1489	25.1343	25.4281	25.0869	-0.299075		0.812971			NaN	11	11	11	14.5	123.33	0	59.258	330320000	35	F9XAR7
F9XAS0	22.5113	22.2247	22.9467	22.7223	23.4429	23.2117	-0.564763		0.880849			NaN	4	4	4	7.2	122.26	0	4.2342	67412000	5	F9XAS0
F9XAS7	NaN	21.6099	20.8792	21.3571	21.3534	21.1242	-0.0337003		0.0386718	+		-0.984347	2	2	2	23.4	12.528	0	4.904	25887000	5	F9XAS7
F9XAT2	23.4103	23.0974	22.9911	22.9209	23.0874	22.4711	0.339806		0.694232			NaN	2	2	2	7.8	35.994	0	4.0267	76387000	9	F9XAT2
F9XAT6	24.1789	23.9845	23.5407	23.3794	23.8477	23.5371	0.31333		0.600368			NaN	4	4	4	32.9	27.575	0	17.191	229440000	18	F9XAT6
F9XAU5	22.6308	22.5531	22.5737	22.4497	22.7186	22.1209	0.156178		0.375632	+		-0.962296	2	2	2	8.3	41.257	0	4.776	50135000	9	F9XAU5
F9XAV0	28.4032	28.5937	28.3015	28.5437	28.4811	28.8363	-0.18759		0.604684			NaN	18	18	18	55.3	61.875	0	323.31	3800200000	135	F9XAV0
F9XAV4	22.6847	22.024	22.7218	22.4527	22.9332	22.4999	-0.15178		0.215795			NaN	3	3	3	4.1	175.26	0	2.9208	48374000	2	F9XAV4
F9XAV8	25.4277	24.889	24.8353	24.5975	24.5593	24.1705	0.608216		1.22518			NaN	4	4	4	40.8	19.158	0	40.325	296700000	20	F9XAV8
F9XB03	NaN	NaN	20.2017	19.9594	19.6953	19.674	0.425444		0			NaN	1	1	1	1.7	72.111	0.0087241	1.2937	8187500	1	F9XB03
F9XB28	24.9719	24.8106	25.1231	25.1557	24.7324	24.6606	0.118947		0.265644	+		-0.984709	4	4	4	24	33.765	0	11.731	280170000	24	F9XB28
F9XB30	23.4389	23.5745	23.5355	22.54	22.7556	23.4717	0.593868		0.978289			NaN	3	3	3	13.8	46.689	0	14.905	107630000	13	F9XB30
F9XB53	25.7523	25.2009	24.712	24.8892	24.3322	24.6959	0.582635		0.786105	+		-0.840863	5	5	5	41.1	16.802	0	76.23	462900000	39	F9XB53
F9XBB4	23.7379	24.7542	25.2979	23.0285	24.4615	25.7532	0.182281		0.0700601			NaN	2	2	2	13.9	33.196	0	27.259	284200000	15	F9XBB4
F9XBJ6	25.7652	26.0427	25.1874	25.7283	26.0788	25.8889	-0.233515		0.358247			NaN	12	12	12	31.6	61.105	0	28.338	673000000	37	F9XBJ6
F9XBL6	25.6162	25.5032	25.8185	25.4015	25.4271	25.2632	0.281981		1.25647			NaN	8	8	8	22.2	57.187	0	124.54	406490000	46	F9XBL6
F9XBN0	23.1277	23.2229	23.0004	22.7341	23.1093	23.1261	0.127167		0.371723			NaN	2	2	2	4	122.91	0	3.3899	69049000	5	F9XBN0
F9XBQ2	NaN	22.2796	NaN	22.6173	21.6761	22.135	0.136782		0			NaN	1	1	1	14.9	10.978	0	4.2144	30594000	4	F9XBQ2
F9XBQ7	24.4424	24.4413	24.8998	24.0608	24.5453	24.2156	0.320592		0.699065			NaN	4	4	4	19.3	37.828	0	12.98	193520000	18	F9XBQ7
F9XBR3	27.3114	27.2681	27.1276	27.4262	27.2764	27.1579	-0.0511335		0.207292			NaN	24	24	24	29.9	128.72	0	194	1567500000	108	F9XBR3
F9XBS1	28.6402	28.7342	28.591	28.5534	28.7486	28.5692	0.0313956		0.15586			NaN	21	21	21	51.7	66.951	0	323.31	3986700000	199	F9XBS1
F9XBS4	27.0048	26.9708	27.4676	26.6	26.3884	26.7918	0.554337		1.31057			NaN	5	5	5	32.3	32.817	0	179.18	1253700000	36	F9XBS4
F9XBV7	25.9136	25.568	25.9598	25.997	25.9911	25.7933	-0.11331		0.332156			NaN	15	15	15	27	97.564	0	99.01	806330000	50	F9XBV7
F9XBW4	24.5231	23.8235	24.4544	23.5868	23.7199	24.4553	0.346305		0.421971			NaN	4	4	4	19.5	26.52	0	9.1601	193440000	19	F9XBW4
F9XBW7	21.5528	21.7268	21.3486	22.1489	22.1653	21.5347	-0.406876		0.801899			NaN	1	1	1	2.4	61.576	0.0024691	1.9337	34127000	4	F9XBW7
F9XBW8	24.1128	24.0202	24.6851	24.1529	24.0956	24.3374	0.0774085		0.128975			NaN	4	4	4	31.2	28.687	0	84.196	189510000	17	F9XBW8
F9XBY7	21.7444	21.751	21.8883	NaN	22.0165	21.6926	-0.0600169		0.163164			NaN	2	2	2	8	41.779	0	3.909	56780000	5	F9XBY7
F9XBZ0	22.0296	22.4141	21.9239	22.6969	22.6135	22.4199	-0.454252		1.25393			NaN	3	3	3	10.7	44.189	0	4.4456	48128000	7	F9XBZ0
F9XBZ4	24.9868	25.2056	24.9887	25.2102	25.3131	25.1906	-0.177604		1.01734			NaN	12	12	12	20.3	113.85	0	46.405	364010000	45	F9XBZ4
F9XBZ7	21.8464	22.134	22.1112	21.5075	22.473	22.2084	-0.0324065		0.0362886			NaN	2	2	2	10.1	35.843	0	3.5106	41638000	5	F9XBZ7
F9XC11	25.3495	27.124	25.2677	25.6739	26.2156	27.2464	-0.464928		0.240819			NaN	7	7	7	44.3	33.067	0	55.713	797200000	57	F9XC11
F9XC17	25.6526	26.2139	26.225	26.1134	26.7732	26.4915	-0.428862		0.73092	+		-0.601746	5	5	5	50	16.837	0	77.975	893290000	35	F9XC17
F9XC18	23.6241	23.4727	23.3044	23.2317	23.2693	22.8603	0.346629		1.01763			NaN	5	5	5	11.7	73.983	0	9.0181	105930000	16	F9XC18
F9XC47	21.7815	21.6307	21.666	20.7555	21.3321	21.8136	0.392334		0.563273			NaN	3	3	3	5.8	144.75	0	4.1343	50363000	4	F9XC47
F9XC71	23.9061	23.3115	23.6057	23.135	23.1001	23.3086	0.426543		1.09374			NaN	5	5	5	30.6	38.194	0	9.9219	101210000	19	F9XC71
F9XC78	23.6903	23.8283	23.7772	23.2911	23.6651	23.9707	0.122948		0.241779			NaN	5	5	5	27.5	34.659	0	164.28	228540000	32	F9XC78
F9XC87	25.8582	25.2595	26.061	25.7185	25.5855	25.203	0.223869		0.321125			NaN	14	14	14	22	106.64	0	34.389	462160000	40	F9XC87
F9XC90	27.1309	27.013	27.0617	27.1647	26.9189	26.5046	0.20579		0.453252			NaN	9	9	9	42.1	41.363	0	173.56	1393800000	74	F9XC90
F9XCA1	24.3178	24.6568	24.2291	24.2081	24.4951	24.6809	-0.060161		0.11536			NaN	9	9	9	18.1	96.863	0	18.499	244180000	21	F9XCA1
F9XCB7	23.4953	23.1654	23.7298	23.3351	23.5151	23.1155	0.1416		0.285016			NaN	4	4	4	6.6	110.14	0	25.629	93507000	15	F9XCB7
F9XCC6	21.8628	20.5115	21.397	NaN	NaN	NaN	NaN		0			NaN	1	1	1	2.3	71.668	0	2.6555	13000000	3	F9XCC6
F9XCE0	23.6822	24.4697	20.6802	23.9756	23.8219	24.8348	-1.26676		0.456526			NaN	6	6	6	11.7	99.101	0	12.501	201710000	11	F9XCE0
F9XCI2	23.3752	23.4414	22.2036	22.3852	22.7081	23.5541	0.124275		0.0826075			NaN	3	3	3	11.4	56.901	0	15.671	93741000	14	F9XCI2
F9XCI6	28.3017	29.423	28.5059	28.9732	29.2895	29.0735	-0.368563		0.443111			NaN	22	22	22	37.9	111.07	0	323.31	5525200000	161	F9XCI6
F9XCJ9	23.7664	23.507	23.7007	23.7413	23.7986	23.6338	-0.0665207		0.294111	+		-0.981457	3	3	3	3.8	123.79	0	3.4975	128640000	1	F9XCJ9
F9XCL4	20.6957	NaN	21.6803	21.3954	21.4973	21.3051	-0.211287		0.213597			NaN	1	1	1	5	21.214	0.0078387	1.3711	13641000	1	F9XCL4
F9XCN0	25.581	25.6267	25.8751	25.8065	25.8072	25.2631	0.0687275		0.123815			NaN	9	9	9	20.1	84.377	0	56.994	477020000	45	F9XCN0
F9XCN1	21.7143	21.2007	20.9947	20.715	21.1127	20.965	0.372325		0.697085			NaN	1	1	1	3.9	43.012	0	2.636	21656000	1	F9XCN1
F9XCN6	23.8242	23.6661	23.9955	23.7936	23.8984	23.8175	-0.00788562		0.0263723			NaN	3	3	3	8.5	52.229	0	14.823	137330000	11	F9XCN6
F9XCQ2	24.4083	23.4447	24.3433	23.4629	23.3117	22.5513	0.956796		1.07123			NaN	7	7	7	14.4	84.352	0	30.313	132960000	20	F9XCQ2
F9XCR1	24.0504	25.3263	25.49	25.1883	25.4867	25.5127	-0.440329		0.399101			NaN	9	9	9	30.5	59.276	0	145.77	364100000	25	F9XCR1
F9XCR4	25.27	25.6428	25.3832	25.2064	25.486	25.4477	0.0519422		0.136105			NaN	11	11	11	18.8	102.84	0	27.614	426990000	31	F9XCR4
F9XCT5	22.8639	22.9673	24.7093	23.7546	24.3574	23.8226	-0.464712		0.300562			NaN	5	5	5	10.5	73.003	0	10.586	131810000	4	F9XCT5
F9XCU2	21.588	22.9045	NaN	22.2709	22.0472	22.1566	0.0880146		0.0600385			NaN	2	2	2	4.6	77.677	0.0025284	2.0635	41937000	1	F9XCU2
F9XCV4	NaN	23.1639	NaN	22.0982	22.8119	22.9961	0.528447		0			NaN	4	4	4	7	134.49	0	3.8594	57896000	7	F9XCV4
F9XCW7	21.1746	21.7823	21.807	21.176	21.1009	NaN	0.449509		0.715239			NaN	2	2	2	4.8	57.887	0.0059242	1.7165	22736000	2	F9XCW7
F9XCX4	27.0082	27.4135	27.1308	27.6174	27.5209	27.2857	-0.29049		0.870817			NaN	13	13	13	54.7	43.612	0	323.31	1834900000	89	F9XCX4
F9XCZ5	25.248	25.079	24.74	25.6683	25.3031	25.3298	-0.41144		1.01611			NaN	2	2	2	18.1	16.771	0	12.862	428670000	16	F9XCZ5
F9XD10	22.3401	22.594	24.376	24.1262	24.4012	23.7852	-1.00084		0.684705			NaN	4	4	4	14.9	53.465	0	90.668	148760000	11	F9XD10
F9XD36	22.8497	22.4352	23.3302	22.7697	22.8492	22.9643	0.0106392		0.0132896			NaN	3	3	3	10.3	46.663	0	6.464	63244000	6	F9XD36
F9XD43	28.5279	28.3245	28.118	28.2866	28.065	27.6634	0.318487		0.664021			NaN	5	5	5	39.8	11.37	0	72.746	3414500000	109	F9XD43
F9XD56	23.0148	23.3426	22.5976	23.8256	23.7205	23.7626	-0.784563		1.64416			NaN	7	7	7	8.3	135.47	0	12.159	117630000	14	F9XD56
F9XD72	29.6352	28.8559	29.1293	26.0974	26.0011	26.4571	3.0216	+	3.45798	+	+	0.982666	7	7	7	45.8	21.758	0	305.41	2633000000	69	F9XD72
F9XD94	25.2749	24.7542	25.2663	24.8512	25.181	24.4464	0.27225		0.425074			NaN	4	4	4	14.1	52.553	0	83.55	289480000	26	F9XD94
F9XDB6	24.3325	23.6848	24.32	23.5029	23.6824	23.2781	0.624595		1.20433			NaN	3	3	3	27.4	15.777	0	36.943	139830000	16	F9XDB6
F9XDC4	20.3036	19.7891	20.2907	19.873	20.0145	19.7162	0.259942		0.614037			NaN	NaN	NaN	NaN	1.1	NaN	NaN	NaN	NaN	NaN	F9XDC4
F9XDD6	NaN	22.3539	NaN	21.4241	21.5232	21.809	0.768466		0			NaN	2	2	2	11.3	36.892	0	3.7975	32639000	1	F9XDD6
F9XDF5	21.7376	21.8891	21.944	21.8359	21.944	21.8047	-0.00464948		0.0207276			NaN	2	2	2	2.8	120.14	0	2.7193	35464000	5	F9XDF5
F9XDF7	22.8953	22.0727	22.4998	22.2326	22.1797	22.6584	0.132356		0.178512			NaN	2	2	2	7	48.457	0	2.7616	51174000	6	F9XDF7
F9XDJ6	20.9489	20.1104	22.2026	21.2719	22.459	21.7439	-0.737644		0.454895			NaN	1	1	1	5.4	42.812	0.0025413	2.0922	27400000	8	F9XDJ6
F9XDK0	22.404	22.5486	22.6881	22.7122	22.4756	22.1665	0.0954583		0.207425			NaN	2	2	2	16.1	43.199	0	4.2901	46132000	5	F9XDK0
F9XDK3	26.8181	27.2661	26.9455	27.268	27.7978	27.088	-0.374723		0.677461			NaN	5	5	5	18.6	22.475	0	191.67	2093500000	28	F9XDK3
F9XDL6	21.2741	21.33	21.3116	21.1755	22.1809	21.8295	-0.423412		0.648674			NaN	2	2	2	7.4	61.016	0	2.4155	28608000	4	F9XDL6
F9XDM2	NaN	21.7625	21.6011	21.2012	21.5687	21.4073	0.289364		0.826481			NaN	2	2	2	6.3	72.027	0	3.3497	25788000	5	F9XDM2
F9XDN3	22.8641	21.8247	22.4687	21.783	22.1716	21.2452	0.652559		0.739282			NaN	1	1	1	3.9	31.975	0	10.028	40163000	7	F9XDN3
F9XDN9	24.5495	26.7174	25.9403	27.2631	26.3987	26.3164	-0.923689		0.58671	+		-0.875217	3	3	3	18.5	21.22	0	48.131	1108600000	27	F9XDN9
F9XDQ8	26.3442	27.5948	26.6278	26.8127	26.9891	27.6726	-0.302542		0.261968			NaN	5	5	5	26.9	24.977	0	232.05	1820300000	54	F9XDQ8
F9XDQ9	24.9089	25.281	24.8344	25.2336	24.9098	24.8911	-0.00342687		0.00634071			NaN	3	3	3	22	11.659	0	12.375	292960000	14	F9XDQ9
F9XDR5	25.0732	23.894	NaN	24.9226	23.9857	24.5289	0.00452423		0.00257684			NaN	1	1	1	1.2	179.54	0.0057143	1.5002	275780000	2	F9XDR5
F9XDS2	22.0229	21.9567	22.0065	20.9789	21.3796	20.8678	0.919916		2.37614			NaN	2	2	2	9.7	50.659	0.0025674	2.1208	26101000	6	F9XDS2
F9XDT0	23.8783	23.5832	23.1972	24.5468	24.802	23.958	-0.882706		1.2994			NaN	6	6	6	15.9	71.823	0	12.131	199250000	13	F9XDT0
F9XDT9	23.7061	23.2187	24.0758	23.4103	23.9037	23.6024	0.0280622		0.0330395			NaN	3	3	3	19.3	21.926	0	5.0098	122880000	4	F9XDT9
F9XDU3	25.3653	25.8449	25.5814	25.7846	25.7223	25.4923	-0.0691986		0.157416			NaN	9	9	9	34.2	55.012	0	96.945	464660000	45	F9XDU3
F9XDU4	23.2143	22.8227	22.9695	22.9046	23.4344	22.9661	-0.0995878		0.18793			NaN	4	4	4	11.4	65.951	0	8.895	86271000	16	F9XDU4
F9XDV6	23.9624	23.7616	23.671	23.913	23.7285	23.3182	0.145119		0.301394			NaN	4	4	4	17.5	34.913	0	6.1178	129620000	12	F9XDV6
F9XDX0	20.9053	20.4831	22.8138	22.4655	22.5415	21.7292	-0.844705		0.481517			NaN	3	3	3	5.5	113.69	0	4.5944	44064000	4	F9XDX0
F9XDZ5	25.635	25.5945	25.4905	25.4934	25.051	26.1412	0.0114772		0.0118581			NaN	8	8	8	29	54.894	0	39.174	475960000	25	F9XDZ5
F9XDZ8	24.973	25.2985	24.8294	24.7497	25.0837	24.9221	0.115138		0.273235			NaN	4	4	4	24.8	25.314	0	17.111	306750000	17	F9XDZ8
F9XE57	28.3068	28.1128	28.3978	27.7134	27.9159	28.3943	0.264602		0.533294			NaN	13	13	13	47.7	54.286	0	323.31	2921500000	96	F9XE57
F9XE65	NaN	22.3758	NaN	22.6038	21.0065	22.7547	0.254112		0			NaN	2	2	2	21.3	19.792	0	3.8272	40010000	5	F9XE65
F9XE86	18.9575	NaN	22.3057	21.713	21.5658	21.5332	-0.972382		0.306897			NaN	1	1	1	2.2	59.367	0	2.4115	21055000	5	F9XE86
F9XE90	19.9093	19.4543	21.1656	20.8513	21.5097	20.9232	-0.9184		0.764838			NaN	1	1	1	3.1	64.953	0.0077605	1.34	17808000	7	F9XE90
F9XE99	22.8016	22.6958	22.988	22.7729	22.98	22.3768	0.118564		0.237471			NaN	3	3	3	14.9	46.349	0	5.0893	65054000	10	F9XE99
F9XEA0	24.5897	24.1714	24.5765	24.0421	23.8405	23.7187	0.578783		1.59409			NaN	2	2	2	25.9	16.496	0	5.6235	169160000	10	F9XEA0
F9XEC2	20.5865	20.7776	21.0287	NaN	NaN	20.4754	0.322273		0			NaN	1	1	1	3.5	68.523	0	2.4164	10077000	1	F9XEC2
F9XED0	25.7722	25.5955	26.3188	25.7694	25.9466	25.6033	0.122409		0.196686			NaN	8	8	8	28.4	45.935	0	283.08	572560000	42	F9XED0
F9XEF7	20.8633	22.0832	21.4477	21.7656	21.9219	21.9131	-0.402149		0.492641			NaN	2	2	2	3	92.231	0	3.9173	34793000	5	F9XEF7
F9XEG7	23.262	24.1006	NaN	NaN	26.0933	24.738	-1.73436		0.791883	+		-0.978427	2	2	2	2.9	209.8	0.0059595	1.7398	225200000	1	F9XEG7
F9XEI5	24.3558	22.6306	24.5992	21.88	21.9212	21.0852	2.23304	+	1.52382	+	+	0.985606	3	3	3	9.5	32.391	0	14.792	73088000	6	F9XEI5
F9XEI9	21.9721	22.0561	22.0252	21.8847	22.2004	21.3737	0.198148		0.338142			NaN	4	4	4	5.7	81.203	0	3.4712	448430000	8	F9XEI9
F9XEK9	23.143	22.9826	21.2779	21.8853	22.873	22.1712	0.158001		0.0841427			NaN	2	2	2	24.5	22.38	0	2.7663	84152000	9	F9XEK9
F9XEM2	NaN	19.8024	20.0309	19.7812	19.5106	19.4896	0.322899		0.930451			NaN	2	2	2	1	188.9	0.0012953	2.1734	95994000	1	F9XEM2
F9XEM5	24.4369	25.4312	22.4295	25.1539	25.4839	25.3513	-1.23049		0.623245			NaN	5	5	5	23.5	41.36	0	68.915	352770000	17	F9XEM5
F9XEN3	28.5397	28.486	28.087	28.6227	28.309	28.001	0.0599855		0.0933557			NaN	3	3	3	10.2	41.467	0	9.1858	2967300000	8	F9XEN3
F9XEP0	26.9133	27.6559	26.7052	27.4556	27.5581	27.9296	-0.556326		0.797009			NaN	17	17	17	39.7	77.423	0	323.31	1910500000	90	F9XEP0
F9XEP9	24.943	24.8384	24.5768	24.9256	24.6991	24.5012	0.0773926		0.179432			NaN	5	5	5	19.2	55.82	0	25.699	272570000	22	F9XEP9
F9XEQ0	22.9261	23.9244	24.2036	24.3047	23.9732	24.0639	-0.429213		0.463602			NaN	4	4	4	21.9	30.022	0	54.689	149450000	19	F9XEQ0
F9XER9	21.5981	21.5004	21.4736	21.5117	21.9371	21.3003	-0.0590134		0.111913			NaN	5	5	5	6	115.27	0	4.6373	51127000	5	F9XER9
F9XES5	22.1951	20.7794	21.9494	NaN	20.941	19.7984	1.27158		0.770238			NaN	1	1	1	2.4	70.407	0	8.0804	17352000	4	F9XES5
F9XEY2	21.0528	20.9181	21.2485	20.941	20.9038	NaN	0.150751		0.504442			NaN	1	1	1	6.5	31.474	0.0036014	1.8032	11162000	1	F9XEY2
F9XEY5	23.3098	22.132	22.9205	21.5421	22.6917	21.5379	0.863558		0.768893			NaN	1	1	1	16.5	9.6672	0	3.4403	63921000	14	F9XEY5
F9XEZ1	25.9632	25.5761	25.9033	25.4834	25.4526	25.2336	0.42433		1.37794			NaN	9	9	9	29.1	58.955	0	76.18	469430000	36	F9XEZ1
F9XEZ4	23.7204	22.5244	24.1399	22.8113	23.1145	22.4731	0.661945		0.567709			NaN	2	2	2	5.8	112.9	0.0024814	1.959	53034000	5	F9XEZ4
F9XF33	NaN	NaN	21.8607	21.5159	21.3533	21.1206	0.530813		0			NaN	2	2	2	13.7	26.243	0	2.8143	17992000	4	F9XF33
F9XF92	27.5799	27.2974	27.2243	27.1483	27.1057	26.9889	0.286198		1.1364			NaN	18	18	18	54.2	65.136	0	122.31	1394600000	81	F9XF92
F9XFB0	NaN	25.5826	NaN	26.0316	25.8693	25.444	-0.199003		0			NaN	2	2	2	20.6	32.067	0	3.8484	414580000	2	F9XFB0
F9XFB3	25.2233	22.0206	24.9399	25.1875	26.753	24.3129	-1.35657		0.470936			NaN	5	5	5	37.5	11.746	0	94.693	680520000	67	F9XFB3
F9XFC0	22.9293	22.5366	22.3554	22.8592	22.7477	22.4513	-0.0789661		0.140141			NaN	2	2	2	9.8	34.061	0	3.4019	52006000	8	F9XFC0
F9XFC6	25.8762	25.7109	25.7893	25.9036	26.0678	25.4924	-0.0291328		0.0566558			NaN	18	18	18	18.2	192.03	0	149.79	561860000	72	F9XFC6
F9XFC7	25.8435	25.3339	25.6982	24.7162	25.2081	24.934	0.672405		1.49691			NaN	6	6	6	36.3	30.363	0	93.762	452040000	32	F9XFC7
F9XFH6	23.3784	22.7841	22.9675	22.3461	22.8271	22.2182	0.579518		1.0664			NaN	1	1	1	15.7	14.477	0	4.9709	71755000	8	F9XFH6
F9XFL1	25.4567	25.8864	25.6341	25.4436	25.673	25.4957	0.12159		0.354382			NaN	10	10	10	36.7	52.098	0	78.57	507070000	35	F9XFL1
F9XFL4	24.8061	24.4324	24.2003	24.2347	24.3265	24.1126	0.255006		0.611831			NaN	4	4	4	11.3	75.64	0	56.39	186370000	9	F9XFL4
F9XFM0	24.9238	24.8896	24.6488	24.672	24.7676	24.0945	0.309364		0.610389			NaN	4	4	4	28.2	21.423	0	58.463	268360000	14	F9XFM0
F9XFM5	24.42	24.2667	24.1283	24.3213	24.1917	24.2469	0.0183296		0.0694934			NaN	8	8	8	13.1	99.497	0	16.501	182970000	18	F9XFM5
F9XFQ5	27.3227	28.0847	27.1083	27.9061	27.6875	28.071	-0.382978		0.533499			NaN	14	14	14	58.7	46.943	0	323.31	2337000000	116	F9XFQ5
F9XFR4	25.1038	26.1951	25.2233	25.2776	25.7954	25.9848	-0.178537		0.166101			NaN	6	6	6	35.1	36.042	0	141.79	856860000	69	F9XFR4
F9XFS6	21.9673	21.7165	22.5105	22.2022	21.623	21.6588	0.236788		0.324057			NaN	2	2	2	6.2	61.243	0	3.4154	37552000	6	F9XFS6
F9XFW1	23.345	22.0885	23.0705	22.2267	22.3619	21.6838	0.743883		0.791182			NaN	2	2	2	15.9	20.122	0	2.8078	125520000	5	F9XFW1
F9XFW2	20.7784	19.7082	25.607	25.2936	25.4266	25.6001	-3.40894		0.873519			NaN	2	2	2	15.3	19.996	0	61.45	332900000	16	F9XFW2
F9XFW3	25.8007	26.4856	25.8152	26.2347	26.3015	26.3728	-0.269177		0.514619			NaN	9	9	9	33.1	51.657	0	207.98	809490000	48	F9XFW3
F9XFW5	25.3842	24.6445	25.5055	24.7262	25.0609	24.2719	0.491714		0.626823			NaN	10	10	10	16.4	85.558	0	24.668	291930000	29	F9XFW5
F9XFY5	23.4306	23.2524	24.0259	23.5799	23.5874	23.7982	-0.0855293		0.128325			NaN	4	4	4	18.4	41.025	0	11.482	120410000	14	F9XFY5
F9XG12	23.0545	23.0231	23.1281	22.549	23.2042	22.9415	0.170344		0.369526			NaN	3	3	3	11.2	56.396	0	6.097	75939000	10	F9XG12
F9XG29	22.727	22.9095	22.6536	22.4075	22.4192	22.2929	0.390212		1.9767			NaN	1	1	1	3.2	56.247	0	2.9146	55060000	6	F9XG29
F9XG31	25.6976	26.3714	26.4542	26.674	26.6264	26.4442	-0.407119		0.749026			NaN	9	9	9	31.2	53.378	0	110.84	894950000	62	F9XG31
F9XG32	23.4874	23.3935	23.1999	22.5428	23.1444	22.8242	0.523117		1.26964	+		-0.985025	2	2	2	5.3	61.474	0	3.2958	80035000	5	F9XG32
F9XG40	24.2445	23.1203	24.0459	24.7148	24.3943	24.5414	-0.746626		0.975722			NaN	9	9	9	16.1	116.3	0	33.959	215280000	25	F9XG40
F9XG45	NaN	23.479	NaN	23.1408	23.4144	23.2381	0.214602		0			NaN	2	2	2	7.4	33.666	0	3.3837	84200000	5	F9XG45
F9XG47	23.0574	23.5271	24.0763	NaN	21.4632	21.453	2.09549	+	1.9299	+	+	0.990169	4	4	4	7.4	126.22	0	5.6257	52637000	5	F9XG47
F9XG62	20.92	20.1685	22.1579	20.0159	NaN	20.1995	0.974441		0.544146			NaN	1	1	1	4.4	40.508	0	2.5427	13246000	1	F9XG62
F9XG81	20.9466	20.389	20.9403	20.571	20.4928	19.7393	0.49095		0.691665			NaN	1	1	1	3.1	55.087	0	3.0014	13479000	4	F9XG81
F9XG85	24.5158	24.295	24.7226	24.2544	24.3537	23.8997	0.341914		0.859176			NaN	8	8	8	12.6	108.96	0	25.505	199140000	25	F9XG85
F9XGA6	24.7463	24.638	24.4892	24.4406	24.6942	24.8224	-0.027895		0.0726291			NaN	9	9	9	10.2	174.89	0	35.784	260680000	21	F9XGA6
F9XGC6	31.5432	32.0503	31.2054	32.0333	32.732	32.7965	-0.920967		1.24819			NaN	59	59	59	66.8	131.35	0	323.31	58710000000	1140	F9XGC6
F9XGG1	21.7048	21.9091	NaN	21.6189	22.4524	22.8325	-0.494359		0.432785			NaN	3	3	3	26.8	25.441	0	4.2477	43700000	7	F9XGG1
F9XGG9	25.2711	24.5759	25.2697	24.8623	24.2901	24.0429	0.640512		0.89021			NaN	5	5	5	16.7	48.844	0	69.873	335140000	25	F9XGG9
F9XGN3	NaN	NaN	22	21.2992	20.9219	20.886	0.964316		0			NaN	1	1	1	5.5	27.186	0.0036496	1.8698	14761000	3	F9XGN3
F9XGN9	22.8895	22.7347	23.2613	23.1404	23.5705	22.9594	-0.261595		0.474062			NaN	3	3	3	13.4	40.013	0	3.3923	77004000	10	F9XGN9
F9XGV1	22.8896	22.3852	22.592	22.6221	22.2784	22.0033	0.321025		0.624599			NaN	3	3	3	17.4	50.256	0	4.5757	53985000	10	F9XGV1
F9XGV2	21.844	20.633	22.1309	20.8197	20.4713	21.941	0.458617		0.290633			NaN	2	2	2	7.2	68.573	0	3.4639	25115000	3	F9XGV2
F9XGV7	22.9772	22.6101	23.1411	21.8082	23.0182	22.2055	0.565499		0.657868			NaN	2	2	2	13.8	45.44	0	4.0549	64965000	9	F9XGV7
F9XGX8	22.6413	22.6468	23.2149	22.5044	22.7201	22.1597	0.372916		0.675523			NaN	2	2	2	7.4	45.522	0	2.6623	58437000	3	F9XGX8
F9XGY0	27.0809	26.135	26.7778	26.2846	26.1348	25.7815	0.597628		0.880185			NaN	1	1	1	9	16.912	0	3.1732	784830000	13	F9XGY0
F9XH16	23.1843	24.2123	23.6845	23.0576	23.2908	24.2533	0.159821		0.124062			NaN	4	4	4	12.2	59.599	0	8.6217	118230000	11	F9XH16
F9XH27	21.5009	21.001	21.5395	21.2374	21.5525	20.7048	0.18221		0.237346			NaN	1	1	1	4.3	67.086	0.0087146	1.2819	22440000	5	F9XH27
F9XH41	29.3742	29.0031	29.0128	28.9041	29.0502	28.8205	0.205091		0.667425			NaN	18	18	18	44.9	61.111	0	323.31	6081100000	167	F9XH41
F9XH43	21.3613	20.8217	21.7448	21.4833	21.3942	21.1859	-0.0451654		0.05529			NaN	1	1	1	5.2	27.648	0	13.919	21771000	6	F9XH43
F9XH80	28.8334	28.4383	28.9014	28.5179	28.6744	28.1761	0.268239		0.579996			NaN	7	7	7	59.5	16.847	0	323.31	3708800000	69	F9XH80
F9XH87	28.0829	28.0915	27.8673	28.0779	28.0278	27.9282	0.0025959		0.00999829			NaN	21	21	21	41.7	82.529	0	323.31	2592200000	131	F9XH87
F9XHA0	21.5156	21.4215	21.8832	NaN	21.3852	21.208	0.310162		0.683502			NaN	2	2	2	10.7	29.77	0	8.1356	20479000	5	F9XHA0
F9XHB9	25.3878	23.6569	24.9921	23.4194	22.6927	23.9421	1.32752		0.977005			NaN	6	6	6	16.7	51.406	0	64.202	187690000	21	F9XHB9
F9XHD1	NaN	NaN	20.6617	21.0286	20.7466	20.925	-0.238358		0			NaN	1	1	1	1.5	71.216	0	2.4608	11981000	4	F9XHD1
F9XHF8	26.2645	25.642	25.9967	26.0305	25.9907	25.7153	0.0555884		0.0967194			NaN	2	2	2	18.6	19.468	0	2.4232	141000000	3	F9XHF8
F9XHF9	23.1729	23.2478	23.9154	22.9766	22.8988	23.0785	0.46073		0.888384			NaN	3	3	3	9.2	46.656	0	39.113	88268000	14	F9XHF9
F9XHH4	26.0058	26.3876	25.9248	26.1771	25.92	26.1331	0.0292803		0.0622819	+		-0.98074	10	10	10	26.2	81.659	0	28.716	683610000	37	F9XHH4
F9XHI5	NaN	19.2335	20.2479	19.8158	20.6285	20.4021	-0.541403		0.455501			NaN	1	1	1	3.9	37.072	0.0057208	1.5003	8498000	2	F9XHI5
F9XHJ0	23.2123	24.0024	23.5943	24.7386	23.4988	24.4208	-0.616361		0.63727			NaN	5	5	5	19.5	52.936	0	9.5471	154030000	6	F9XHJ0
F9XHL6	21.3688	23.3365	NaN	23.1467	23.8908	23.1899	-1.05649		0.557964			NaN	4	4	4	19.3	54.027	0	3.5821	94070000	6	F9XHL6
F9XHM3	23.7058	23.1267	24.9911	24.441	24.1813	23.8359	-0.21152		0.134895			NaN	5	5	5	29.9	36.075	0	25.332	181410000	18	F9XHM3
F9XHM8	23.0636	22.136	23.2558	21.8596	22.2584	22.0938	0.747879		0.960523			NaN	3	3	3	5.9	112.58	0	10.911	55340000	15	F9XHM8
F9XHN0	22.0446	21.7358	22.4086	21.4967	21.6916	21.311	0.563209		1.18555			NaN	2	2	2	23	18.995	0	14.516	43723000	10	F9XHN0
F9XHN2	24.9661	25.0445	24.2632	25.5382	25.231	25.3281	-0.607813		1.08058	+		-0.981822	4	4	4	25.6	27.522	0	18.146	447430000	23	F9XHN2
F9XHN8	28.3475	29.3349	27.9841	29.1992	29.0616	29.098	-0.5641		0.625724			NaN	13	13	13	47.4	39.733	0	235.39	6386000000	128	F9XHN8
F9XHQ0	25.1435	25.8418	25.0597	25.5968	25.4542	25.8814	-0.29581		0.459504			NaN	9	9	9	35	49.227	0	24.983	463650000	42	F9XHQ0
F9XHS2	24.9173	24.9431	25.1934	24.9831	25.1482	24.7602	0.0540892		0.140215			NaN	8	8	8	22.8	55.55	0	86.037	305250000	37	F9XHS2
F9XHU2	NaN	NaN	21.749	21.6687	21.0721	21.7125	0.264531		0			NaN	2	2	2	21.7	23.955	0	2.7298	26460000	6	F9XHU2
F9XHU8	23.9908	23.6431	23.9386	23.1763	23.6801	23.1763	0.513267		1.20708			NaN	5	5	5	27.9	29.747	0	11.158	115860000	10	F9XHU8
F9XHX6	NaN	21.6807	24.3645	24.0819	23.6842	23.3843	-0.694174		0.259684			NaN	1	1	1	7.6	14.164	0	2.6049	111880000	7	F9XHX6
F9XHX8	NaN	NaN	22.8246	22.4017	22.1614	22.2774	0.544456		0			NaN	2	2	2	6.7	48.733	0	14.594	74603000	3	F9XHX8
F9XHZ7	22.1056	21.8543	23.1398	NaN	22.1914	22.5037	0.0189749		0.0117821			NaN	3	3	3	16.1	37.45	0	4.7426	43837000	4	F9XHZ7
F9XI08	24.9152	21.5174	25.4104	21.0604	21.0697	21.4007	2.77075		1.05977			NaN	2	2	2	13.5	37.397	0	24.621	96677000	3	F9XI08
F9XI09	21.7853	21.7991	21.5378	21.8882	21.8042	21.4846	-0.0182508		0.0415943			NaN	3	3	3	8.8	76.182	0	3.9169	32124000	5	F9XI09
F9XI12	26.4357	27.2057	26.078	26.9273	27.1672	26.9276	-0.434224		0.563397			NaN	13	10	10	48.2	35.112	0	119.72	1167200000	52	F9XI12
F9XI36	25.1647	25.1818	24.8662	25.1195	25.1195	25.0219	-0.0160573		0.0513526	+	+	0.088473	4	4	4	18.6	32.197	0	10.862	322180000	26	F9XI36
F9XI48	28.1043	28.6635	27.4802	25.7733	26.3158	26.372	1.92897	+	2.10305	+		-0.296719	15	15	15	40.8	51.035	0	323.31	1572400000	106	F9XI48
F9XI54	20.4194	19.7298	20.4221	20.0881	19.9078	20.0585	0.172289		0.294545			NaN	1	1	1	10.8	17.634	0	7.7279	21562000000	10	F9XI54
F9XI69	24.0441	23.3899	24.2428	23.6582	23.651	23.0417	0.441989		0.60198			NaN	5	5	5	11.2	74.517	0	7.1943	124450000	7	F9XI69
F9XI77	21.8	21.4734	21.4437	21.4953	21.7974	20.8884	0.17866		0.242644			NaN	NaN	NaN	NaN	1.6	NaN	NaN	NaN	NaN	NaN	F9XI77
F9XI78	21.5466	20.8783	21.6708	21.0672	20.9722	20.3027	0.584523		0.783454			NaN	1	1	1	7.9	23.728	0	2.4274	19603000	7	F9XI78
F9XI80	NaN	21.7058	NaN	21.4543	21.5168	21.4795	0.22224		0			NaN	2	2	2	5.3	77.722	0	2.483	21544000	6	F9XI80
F9XI81	24.7573	25.5286	25.1836	25.2419	25.0423	25.2199	-0.0115484		0.0165272			NaN	9	9	9	26.7	67.997	0	66.449	349430000	33	F9XI81
F9XIB4	24.752	25.452	25.277	25.375	25.5601	25.2727	-0.242264		0.462056			NaN	7	7	7	62.9	16.668	0	174.22	389570000	34	F9XIB4
F9XIB9	24.4035	24.8019	24.3977	24.0438	24.414	24.0769	0.356141		0.932291			NaN	5	5	5	22.3	40.119	0	21.759	230160000	13	F9XIB9
F9XIC0	22.2476	21.6301	22.2953	21.6493	21.8139	21.0003	0.569856		0.803306			NaN	2	2	2	2.3	133.09	0	2.7288	30156000	3	F9XIC0
F9XIC2	25.3841	25.6094	24.7883	25.4491	25.5261	25.373	-0.188817		0.309511			NaN	8	8	8	21.6	58.325	0	82.407	463220000	29	F9XIC2
F9XIC3	27.3843	26.3315	27.0485	27.048	26.3285	25.4984	0.629797		0.505776			NaN	6	6	6	31.2	12.436	0	198.98	1037900000	39	F9XIC3
F9XIC5	NaN	23.4311	NaN	21.7274	23.893	24.2663	0.135541		0			NaN	4	4	4	7.1	162.78	0	2.5362	254710000	5	F9XIC5
F9XIC9	21.6214	21.2163	21.7269	21.4512	21.4359	21.5568	0.0402368		0.0893478			NaN	2	2	2	4.3	95.227	0	4.9525	26324000	2	F9XIC9
F9XID1	21.845	22.0462	21.6792	22.5244	22.1305	21.7084	-0.264312		0.438666			NaN	1	1	1	3.6	44.988	0	2.735	37531000	1	F9XID1
F9XIE6	24.5526	23.7998	24.6671	24.3081	23.9644	23.6828	0.354737		0.470384			NaN	5	5	5	17.1	45.238	0	22.861	157130000	26	F9XIE6
F9XIG4	23.9479	24.775	23.7848	24.2814	24.3934	24.6111	-0.25939		0.332592			NaN	7	7	7	28.7	44.053	0	61.118	207190000	25	F9XIG4
F9XII5	25.8957	25.8749	26.6108	27.954	26.26	26.213	-0.681866		0.475867			NaN	3	3	3	2.6	164.95	0	3.8284	880600000	4	F9XII5
F9XII8	21.4661	21.4281	21.2631	NaN	NaN	NaN	NaN		0			NaN	1	1	1	1.9	78.532	0	4.9733	14225000	4	F9XII8
F9XII9	23.1953	22.5864	22.7861	22.796	22.0886	23.1306	0.184226		0.199455			NaN	3	3	3	4.9	147.36	0	5.3127	86288000	5	F9XII9
F9XIJ0	21.2131	19.3893	20.9493	NaN	NaN	NaN	NaN		0	+	+	0.980876	1	1	1	1.7	96.638	0.0077434	1.3378	5445000	3	F9XIJ0
F9XIJ2	25.2053	25.2554	25.9032	25.1926	25.4437	25.1239	0.201241		0.339782			NaN	6	6	6	15.9	69.662	0	51.411	405450000	36	F9XIJ2
F9XIJ5	21.8538	21.8777	21.1326	22.246	21.9912	22.0437	-0.472275		0.855621			NaN	1	1	1	6.2	24.152	0.0024876	1.9727	36163000	7	F9XIJ5
F9XIL2	26.2358	25.1835	25.6079	21.8765	22.95	22.5311	3.22318	+	2.74433	+	+	0.984918	7	7	7	28.9	56.479	0	131.85	173390000	15	F9XIL2
F9XIL9	26.1635	27.5087	27.5442	27.6166	27.7727	27.451	-0.54126		0.511383			NaN	4	4	4	23.7	29.22	0	20.335	1724400000	37	F9XIL9
F9XIM2	NaN	22.3222	22.499	22.169	22.2583	22.0349	0.256523		1.02071			NaN	4	4	4	18.7	41.744	0	4.511	43669000	7	F9XIM2
F9XIN6	NaN	25.0253	NaN	24.5617	25.1229	25.5911	-0.0665836		0			NaN	2	2	2	7.5	63.82	0.0058548	1.6732	219640000	1	F9XIN6
F9XIR4	21.7676	21.1515	21.5508	21.9893	20.8998	20.3789	0.40065		0.324142			NaN	1	1	1	2	81.164	0	3.0014	22877000	5	F9XIR4
F9XIS3	23.0485	22.4933	22.727	22.221	22.575	22.2911	0.393914		0.950424	+		-0.978798	1	1	1	5.6	40.114	0.0024661	1.922	56917000	3	F9XIS3
F9XIS8	25.6942	25.8022	25.1198	25.5405	25.8042	25.4778	-0.0687478		0.10585			NaN	5	5	5	37.8	26.841	0	12.937	507010000	27	F9XIS8
F9XIU6	22.6442	21.3453	23.1343	22.4256	22.9139	21.9003	-0.0386995		0.0211996			NaN	2	2	2	8.5	105.53	0.0036188	1.8297	111450000	5	F9XIU6
F9XIU8	22.065	22.0215	22.0344	22.2496	21.8025	21.2692	0.266514		0.397175			NaN	2	2	2	14	45.608	0	3.7701	38317000	4	F9XIU8
F9XIV1	22.5827	23.1823	21.7935	22.4932	22.8476	23.0001	-0.260831		0.239389			NaN	3	3	3	16.9	36.624	0	8.6581	79084000	14	F9XIV1
F9XIV9	23.0108	22.3291	22.719	21.1528	20.9913	21.7487	1.38868	+	1.99118			NaN	2	2	2	7.9	36.34	0	2.8348	39504000	6	F9XIV9
F9XIW9	24.5728	23.1388	23.839	23.619	23.0492	23.0745	0.602688		0.593699			NaN	2	2	2	10.6	23.036	0	6.5875	136390000	8	F9XIW9
F9XIX5	24.8032	24.5036	25.0857	24.8741	24.5911	24.8975	0.00991948		0.0169034			NaN	5	5	5	15.1	63.729	0	27.495	285740000	18	F9XIX5
F9XIZ8	25.9204	25.8164	26.1323	24.8258	25.1074	24.8949	1.01368	+	2.89035			NaN	7	7	7	51.2	23.964	0	323.31	485490000	25	F9XIZ8
F9XJ26	24.0352	23.0961	23.6347	23.7122	23.3389	23.4625	0.0841351		0.103184			NaN	4	4	4	6.7	128.72	0	8.2581	116130000	7	F9XJ26
F9XJ35	26.5616	27.4408	26.4323	27.522	26.6484	26.7567	-0.164146		0.145381			NaN	11	11	11	45.2	52.077	0	131.31	1283100000	85	F9XJ35
F9XJ41	24.3537	24.9325	24.7656	24.5316	24.5535	24.4988	0.155931		0.379111	+		-0.922352	5	5	5	26.8	30.733	0	84.396	246280000	18	F9XJ41
F9XJA8	25.5107	25.5852	25.4218	25.6527	25.6181	25.6822	-0.145107		1.33851			NaN	18	18	18	16.2	202.25	0	41.792	518920000	51	F9XJA8
F9XJB0	22.3102	21.6833	22.2924	21.7489	22.2753	21.8765	0.128416		0.188911			NaN	2	2	2	8.2	41.354	0	4.9453	39933000	9	F9XJB0
F9XJE0	25.4555	25.5109	25.3727	25.6097	25.2994	25.3328	0.0323594		0.110249			NaN	9	9	9	33.9	53.104	0	20.135	419500000	27	F9XJE0
F9XJE1	27.4213	27.431	27.4264	26.7343	26.9362	26.9909	0.539111		2.63687			NaN	19	19	19	47.7	72.145	0	313.34	1446900000	100	F9XJE1
F9XJJ1	20.4098	20.0562	20.566	20.2628	20.0579	20.0185	0.230906		0.61433			NaN	1	1	1	4.7	39.64	0.0097508	1.2587	10693000	1	F9XJJ1
F9XJK1	23.1645	22.9068	23.1029	22.9752	23.0138	22.9444	0.0802759		0.427467			NaN	4	4	4	11.5	62.874	0	5.7475	83234000	16	F9XJK1
F9XJK8	26.0162	24.7353	25.8825	22.6635	23.1545	22.4699	2.78202	+	2.44203	!		NaN	6	6	6	12.1	94.484	0	65.035	233850000	21	F9XJK8
F9XJL5	23.3434	23.0395	23.0715	22.8224	22.9273	22.6876	0.33907		1.33573			NaN	5	5	5	13.8	62.601	0	8.7157	85986000	13	F9XJL5
F9XJM1	23.9578	24.0605	23.9585	24.3465	23.9783	23.8177	-0.0552565		0.126392			NaN	4	4	4	28.9	40.793	0	9.5803	165690000	7	F9XJM1
F9XJP3	29.8735	26.8885	NaN	27.5596	28.1264	26.0366	1.14016		0.33036			NaN	3	3	3	1.2	287.95	0	2.8504	50731000000	10	F9XJP3
F9XJT0	23.6094	23.5626	23.5114	23.2359	23.4555	23.452	0.179974		1.0855			NaN	3	3	3	9	51.103	0	7.167	100820000	15	F9XJT0
F9XJX8	22.9083	23.2489	22.7353	23.3063	22.9137	22.8038	-0.0437717		0.0714553	+		-0.984671	2	2	2	23.6	11.545	0.002445	1.8911	77902000	4	F9XJX8
F9XK02	NaN	22.1239	NaN	20.9572	21.1662	22.0956	0.717596		0	+		-0.86562	2	2	2	11	31.515	0	2.4391	26410000	4	F9XK02
F9XK04	21.2684	NaN	20.9831	21.1999	21.1751	20.5055	0.165591		0.198817			NaN	1	1	1	12.5	11.205	0.002584	2.1449	14248000	5	F9XK04
F9XK58	28.1962	28.4537	28.1946	28.4527	28.2754	28.1925	-0.0253932		0.077532			NaN	18	18	18	52.3	53.923	0	323.31	3573400000	162	F9XK58
F9XKB8	25.7841	25.6863	25.6116	25.6373	25.3227	25.986	0.0453574		0.0809207			NaN	4	4	4	23.6	47.992	0	2.8178	426900000	5	F9XKB8
F9XKG1	22.0905	21.718	21.775	21.8357	21.5728	21.5171	0.219335		0.653231	+		-0.981001	2	2	2	5.1	94.651	0	4.8861	32776000	11	F9XKG1
F9XKG3	21.7679	21.5804	21.2936	21.2226	21.1395	20.9661	0.437824		1.30445			NaN	2	2	2	7.5	58.768	0	3.89	25557000	4	F9XKG3
F9XKI4	23.1941	23.0113	22.7542	22.9987	23.1393	23.1676	-0.115336		0.346854			NaN	6	6	6	8.8	169.98	0	14.251	82469000	20	F9XKI4
F9XKN0	NaN	NaN	19.2025	18.4631	18.7236	19.4758	0.315056		0			NaN	1	1	1	8.5	42.093	0	4.9919	9368100	2	F9XKN0
F9XKN1	27.1583	27.2719	27.0342	27.0385	27.1067	27.0161	0.101028		0.614329			NaN	14	14	14	50.5	44.19	0	61.149	1705800000	50	F9XKN1
F9XKN2	24.9559	25.1348	25.1387	24.7943	24.3519	25.4877	0.198475		0.231751			NaN	4	4	4	17.9	58.814	0	44.377	310990000	9	F9XKN2
F9XKN3	22.4088	22.7569	22.1072	21.9396	22.2171	22.9005	0.0719007		0.073849			NaN	2	2	2	14.3	45.812	0	5.6286	41878000	4	F9XKN3
F9XKP9	23.1809	22.638	NaN	22.5123	22.4517	22.4456	0.439582		0.919449			NaN	3	3	3	14.3	32.401	0	3.0242	47480000	6	F9XKP9
F9XKR7	20.9836	20.5047	21.4371	NaN	19.2603	20.2195	1.23526		1.04832			NaN	1	1	1	6.1	20.282	0	3.4293	10378000	4	F9XKR7
F9XKT6	21.8012	21.7645	21.883	21.4501	22.5113	20.8827	0.201557		0.157843			NaN	3	3	3	11.4	33.439	0	6.0068	31997000	6	F9XKT6
F9XKV8	20.5047	19.9213	20.9653	NaN	NaN	20.1102	0.353566		0			NaN	1	1	1	4.4	33.353	0.0024722	1.9366	6682500	2	F9XKV8
F9XKX1	22.0437	21.7556	22.2953	22.0437	21.7343	21.664	0.217537		0.486183			NaN	2	2	2	4.3	71.818	0.0059666	1.7401	37744000	3	F9XKX1
F9XKX8	25.0301	24.7857	24.5849	23.5796	23.9162	24.6725	0.744168		1.00364			NaN	5	5	5	19.8	53.304	0	168.56	272830000	19	F9XKX8
F9XKY9	26.6266	25.4519	26.1683	24.5271	25.6016	25.1461	0.99065		1.00523			NaN	4	4	4	33.3	17.764	0	110.72	530200000	21	F9XKY9
F9XKZ5	23.3846	22.847	22.8585	NaN	22.8066	NaN	0.223429		0			NaN	3	3	3	14.5	43.807	0	8.9587	42750000	4	F9XKZ5
F9XKZ8	27.5959	28.0374	27.5587	27.449	27.5357	27.772	0.145091		0.328938			NaN	14	14	14	56.9	50.03	0	280.18	2237900000	107	F9XKZ8
F9XL00	21.7961	NaN	21.6507	21.5201	21.6553	21.7036	0.0970805		0.448159			NaN	2	2	2	11.9	22.331	0.0013123	2.2948	28141000	2	F9XL00
F9XL14	23.3272	24.0676	23.0338	23.5965	23.6937	23.9856	-0.282416		0.357397			NaN	3	3	3	15.3	35.064	0	7.5395	128970000	9	F9XL14
F9XL43	28.1519	28.9065	27.9069	28.1105	28.3324	28.8617	-0.113068		0.109205			NaN	15	15	15	61.3	41.637	0	323.31	4763200000	183	F9XL43
F9XL52	26.0793	26.3228	26.1705	25.9285	25.9242	25.7656	0.318125		1.63331			NaN	8	8	8	32	41.682	0	25.469	653190000	49	F9XL52
F9XL59	22.7328	23.2196	23.0224	22.9003	23.2984	22.5814	0.0648931		0.0921874			NaN	3	3	3	13.2	51.742	0	16.235	79488000	7	F9XL59
F9XL74	28.3839	28.4174	28.3534	28.3227	28.2277	27.9978	0.202175		0.964115			NaN	13	13	10	51.9	36.066	0	126.7	3404800000	104	F9XL74
F9XL75	24.7145	23.7935	24.1336	23.6727	23.5136	23.1197	0.778536		1.16167			NaN	6	6	6	13.4	73.269	0	8.7477	180770000	12	F9XL75
F9XL76	25.8634	25.7172	26.2979	26.843	25.8946	24.9219	0.0729949		0.0428044	+		-0.980103	2	2	2	6	55.842	0	2.5588	1157700000	9	F9XL76
F9XL88	24.1575	23.318	24.1691	22.9416	23.5033	23.4301	0.589867		0.822095			NaN	3	3	3	7	54.726	0	4.4759	118720000	7	F9XL88
F9XL99	25.1976	25.1486	25.6135	25.3228	25.006	25.5773	0.0178757		0.0270812			NaN	5	5	5	20.7	39.042	0	24.552	383500000	20	F9XL99
F9XLA9	23.9754	NaN	NaN	23.0895	23.3867	22.8292	0.873627		0			NaN	1	1	1	1.5	110.9	0.0087432	1.2979	73771000	2	F9XLA9
F9XLB7	26.3477	26.6353	26.2415	26.4331	26.6263	26.5888	-0.141218		0.463571			NaN	12	12	12	22.6	98.036	0	106.72	864170000	46	F9XLB7
F9XLE1	26.0146	26.2855	25.9166	24.5309	25.9661	26.1777	0.513981		0.413176			NaN	8	8	8	78.9	18.091	0	80.148	698550000	38	F9XLE1
F9XLE3	NaN	20.8094	NaN	20.8007	20.6297	20.6339	0.121291		0			NaN	2	2	2	33.8	8.2973	0	2.4702	12002000	2	F9XLE3
F9XLE7	23.2952	22.1146	23.0819	22.22	22.3146	21.7555	0.733861		0.847287			NaN	2	2	2	7.7	40.128	0	7.6834	50591000	8	F9XLE7
F9XLF3	22.2893	21.5378	22.0159	21.5425	21.8326	21.5986	0.289722		0.539961	+	+	0.446659	1	1	1	2.3	46.551	0	2.468	33481000	7	F9XLF3
F9XLH1	24.2484	23.0937	23.8544	23.3561	23.1071	22.9747	0.586191		0.754932			NaN	3	3	3	19.2	23.201	0	26.785	99109000	10	F9XLH1
F9XLI3	22.4555	21.7381	22.956	21.602	21.856	21.2668	0.808283		0.964477			NaN	2	2	2	13.1	26.682	0	6.7322	55102000	6	F9XLI3
F9XLI7	NaN	22.7675	NaN	23.1128	22.8755	23.2358	-0.307213		0			NaN	4	4	4	13.9	48.679	0	4.6913	74735000	5	F9XLI7
F9XLK3	27.2903	27.2963	27.2875	27.3573	27.298	27.4244	-0.0684967		0.870812			NaN	38	38	38	26.6	251.49	0	323.31	1599800000	172	F9XLK3
F9XLK7	22.3026	NaN	22.545	22.3905	21.84	22.1996	0.280413		0.516031			NaN	1	1	1	0.6	200.26	0.0057339	1.5096	37331000	1	F9XLK7
F9XLL2	29.0227	29.2162	28.8629	29.0358	29.1682	28.9213	-0.00786146		0.0210381			NaN	22	22	22	51	70.562	0	323.31	5490900000	209	F9XLL2
F9XLL7	24.1037	24.0275	24.2144	23.8053	24.1783	24.0823	0.0932515		0.305566			NaN	2	2	2	16.3	26.712	0	3.6527	164470000	8	F9XLL7
F9XLL9	24.7598	25.1548	24.7649	25.0081	25.1225	25.2582	-0.236416		0.723981			NaN	8	8	8	18.7	100.64	0	31.029	323960000	30	F9XLL9
F9XLN0	22.4859	22.2869	22.8753	21.8255	22.554	21.7445	0.508022		0.752944			NaN	1	1	1	3.5	70.431	0	2.4002	45470000	7	F9XLN0
F9XLR4	20.2801	20.6497	21.1851	NaN	NaN	NaN	NaN		0			NaN	2	2	2	13.7	36.871	0.001321	2.336	15232000	2	F9XLR4
F9XLR6	25.4036	24.5356	22.9043	NaN	21.2692	21.1931	3.05006	+	1.31462	+	+	0.990074	6	6	6	30.6	40.779	0	27.352	103220000	11	F9XLR6
F9XLT0	26.2701	26.6887	26.1975	26.827	26.2645	26.5324	-0.155878		0.281166			NaN	14	14	14	30	81.645	0	55.815	864880000	44	F9XLT0
F9XLT9	NaN	NaN	20.6975	19.9693	20.4843	19.9046	0.578118		0			NaN	1	1	1	1.6	104.66	0	2.5849	7470800	3	F9XLT9
F9XLU1	24.1355	23.5302	24.4621	23.7684	23.9512	23.6373	0.256985		0.374334			NaN	4	4	4	5.6	146.9	0	17.212	131890000	18	F9XLU1
F9XLU2	25.6513	26.0204	25.2887	25.9887	26.1226	26.0212	-0.390717		0.84345			NaN	7	7	7	30.9	45.49	0	26.07	541700000	26	F9XLU2
F9XLX7	23.0009	22.1076	25.9705	23.4065	23.652	23.5033	0.17241		0.0506324	+		-0.905547	1	1	1	5.3	52.858	0.0025707	2.1233	144640000	8	F9XLX7
F9XLZ0	20.2403	19.2677	21.2917	20.1262	20.7159	20.1211	-0.054498		0.0297235			NaN	1	1	1	6	27.875	0	2.6627	11831000	4	F9XLZ0
F9XM07	23.3092	22.3418	24.7861	23.4265	23.9816	23.9614	-0.310772		0.158882			NaN	2	2	2	8.8	59.527	0	6.458	139230000	7	F9XM07
F9XM11	26.6644	26.3108	26.9861	26.4412	26.2832	25.5164	0.573502		0.763015			NaN	2	2	2	17.1	13.006	0	4.3475	742730000	15	F9XM11
F9XM28	24.3152	24.1625	24.2572	24.5816	23.9827	23.6485	0.174042		0.249253			NaN	6	6	6	16	60.639	0	16.162	165590000	23	F9XM28
F9XM43	NaN	20.4376	NaN	19.6398	19.2782	20.1347	0.753315		0			NaN	1	1	1	14.1	19.067	0.0059172	1.7088	7332700	1	F9XM43
F9XM55	25.6631	25.8337	25.6276	25.0364	25.3706	25.2257	0.49725		1.89609			NaN	5	5	5	15.2	57.481	0	60.176	432120000	44	F9XM55
F9XM56	26.5253	25.7064	26.0614	25.0938	25.3602	25.2663	0.857613		1.57849			NaN	13	13	13	10.9	219.03	0	32.015	492310000	60	F9XM56
F9XM60	25.1428	25.4758	25.4634	25.2207	25.1973	25.1473	0.172241		0.707675			NaN	8	8	8	31	52.732	0	40.106	384120000	27	F9XM60
F9XM85	26.1186	24.8426	25.2303	24.904	24.4985	NaN	0.695911		0.575007			NaN	1	1	1	1	115.72	0.00246	1.9135	306750000	1	F9XM85
F9XM87	25.4576	25.7381	25.7082	25.8373	25.4555	25.3671	0.0813357		0.182864			NaN	6	6	6	32	38.412	0	29.723	477540000	27	F9XM87
F9XM91	24.9836	24.5946	25.6141	25.333	25.4844	24.6539	-0.0930017		0.0840762			NaN	5	5	5	19.2	58.998	0	39.373	323310000	24	F9XM91
F9XMB9	23.9338	24.0631	23.5886	23.852	23.5451	24.2201	-0.0105337		0.014464			NaN	7	7	7	28.3	51.131	0	52.136	166880000	13	F9XMB9
F9XME3	22.3778	22.4494	21.5805	NaN	22.4909	22.3584	-0.288739		0.314832			NaN	4	4	4	9.5	76.357	0	39.36	45968000	6	F9XME3
F9XME9	NaN	22.9724	NaN	23.0858	22.9641	22.1816	0.228633		0			NaN	2	2	2	18.8	21.707	0	4.4317	59937000	3	F9XME9
F9XMI1	28.3278	28.8163	28.4159	28.6232	28.5946	28.8945	-0.184093		0.443978			NaN	23	23	23	60.5	85.029	0	323.31	4197800000	197	F9XMI1
F9XMK2	26.3292	25.7496	26.5262	26.0394	25.9788	25.9773	0.203159		0.362318			NaN	2	2	2	4.8	81.355	0	3.4331	53971000	5	F9XMK2
F9XMK3	21.9861	21.7078	22.5575	21.8328	21.8345	21.7195	0.288177		0.497228			NaN	2	2	2	10.7	41.629	0	4.4359	40328000	7	F9XMK3
F9XMK9	NaN	22.8025	23.1693	22.0089	22.7979	22.258	0.630971		0.818022			NaN	1	1	1	6.1	30.071	0	33.887	41881000	7	F9XMK9
F9XML8	22.2034	22.0224	21.5874	22.0645	22.194	22.2051	-0.216795		0.503472			NaN	2	2	2	6.7	58.678	0	3.6764	42619000	6	F9XML8
F9XMN8	25.8569	25.3962	25.7144	25.428	25.5701	25.0343	0.311693		0.672776			NaN	9	9	9	37.1	51.477	0	95.911	462690000	46	F9XMN8
F9XMQ4	27.0434	27.5225	27.1673	27.4911	27.3236	27.4827	-0.188068		0.540766			NaN	18	18	18	51.1	53.698	0	323.31	3306200000	183	F9XMQ4
F9XMT2	22.7886	22.3302	22.7619	NaN	23.1217	22.6158	-0.241866		0.361761			NaN	3	3	3	15.2	38.8	0	7.3778	55962000	4	F9XMT2
F9XMY4	25.5989	24.8519	25.3461	24.9532	24.9845	24.8147	0.348173		0.704546			NaN	4	4	4	19.2	57.333	0	28.796	505280000	14	F9XMY4
F9XMZ7	25.9511	24.6358	25.9123	NaN	22.1812	22.2106	3.30381	+	2.01663	+	+	0.941197	6	6	6	18.2	62.054	0	33.975	190690000	13	F9XMZ7
F9XN10	25.5668	25.5731	25.2858	24.8153	25.4446	25.4749	0.230293		0.417382			NaN	4	4	4	12.1	68.269	0	4.0067	430740000	6	F9XN10
F9XN11	25.8469	26.7466	26.5932	27.6445	26.7913	26.4051	-0.551397		0.527975			NaN	3	3	3	22.4	13.938	0	21.345	1078300000	28	F9XN11
F9XN14	24.9186	25.0384	25.415	24.8332	24.7912	25.423	0.108157		0.160567			NaN	12	12	12	20.9	122.87	0	44.062	389060000	39	F9XN14
F9XN30	26.436	26.7833	26.8244	26.9558	26.6454	26.6706	-0.0760225		0.182891			NaN	8	8	8	34.4	55.223	0	215.06	1022000000	61	F9XN30
F9XN79	NaN	22.201	NaN	22.1776	21.3518	22.3999	0.224536		0			NaN	1	1	1	16.5	14.046	0	2.3967	33039000	4	F9XN79
F9XN89	22.477	21.8546	22.6711	21.4874	21.9353	21.0853	0.831567		1.12468			NaN	3	3	3	8.7	55.93	0	12.362	38252000	10	F9XN89
F9XNC8	22.0033	20.9652	21.5748	20.4519	NaN	20.6006	0.988169		1.06302			NaN	1	1	1	3	51.596	0	8.0239	16627000	3	F9XNC8
F9XND0	23.2832	21.2368	23.5497	23.5868	23.0315	22.4059	-0.318155		0.146738			NaN	2	2	2	17.4	14.874	0	5.1861	72531000	6	F9XND0
F9XNF4	26.3953	26.2997	26.3084	26.219	26.2712	26.0187	0.164831		0.930491			NaN	10	10	10	26.1	67.631	0	183.54	823560000	44	F9XNF4
F9XNF6	24.5672	24.0467	24.8282	23.4754	23.6837	23.5813	0.90057		1.71611			NaN	5	5	5	40.5	26.658	0	71.247	183140000	25	F9XNF6
F9XNH4	29.7482	29.6304	29.6865	26.9446	27.4065	27.1507	2.52109	+	4.27905	+	+	0.989833	14	14	14	52.7	50.017	0	323.31	4642800000	179	F9XNH4
F9XNJ2	21.6472	23.1591	21.0683	22.7351	23.0119	22.1477	-0.67339		0.427268			NaN	2	2	2	20.5	15.011	0	3.8882	66947000	10	F9XNJ2
F9XNJ7	NaN	NaN	20.2918	19.5988	19.7884	20.0734	0.471569		0			NaN	1	1	1	3.1	55.813	0.0058072	1.6348	5817700	1	F9XNJ7
F9XNK8	24.4897	23.2123	23.9689	20.6112	20.4443	20.0111	3.53478	+	2.9953	+	+	0.988043	1	1	1	3.5	51.365	0.0013193	2.3296	59192000	4	F9XNK8
F9XNM3	25.0764	25.6204	24.7127	26.0312	25.3429	24.8916	-0.285401		0.269791			NaN	1	1	1	6.3	24.273	0	7.1584	443620000	16	F9XNM3
F9XNM4	23.5324	23.0824	23.4389	23.2811	23.5355	23.0971	0.0466735		0.0887582			NaN	6	6	6	14.1	79.696	0	17.401	98401000	13	F9XNM4
F9XNN4	25.4907	24.5509	25.0741	23.7878	24.3395	23.8976	1.03027		1.49126			NaN	5	5	5	19.2	50.341	0	17.639	213890000	16	F9XNN4
F9XNQ8	23.78	23.488	23.5419	23.6802	23.5936	23.0843	0.150606		0.295817	+		-0.940787	3	3	3	17.4	38.488	0	22.677	109230000	11	F9XNQ8
F9XNR5	23.6967	21.7735	23.7555	NaN	21.7553	21.5989	1.39812		0.708571			NaN	1	1	1	6.1	38.131	0.0025381	2.0886	51363000	5	F9XNR5
F9XNS4	22.7391	21.9118	23.7468	24.1177	23.9343	23.5839	-1.07938		0.91083			NaN	3	3	3	12.9	31.722	0	6.059	122820000	9	F9XNS4
F9XNV5	26.4265	26.5091	26.0192	26.5979	26.8419	26.6459	-0.376981		1.04908			NaN	18	18	18	37.9	78.645	0	99.014	1254800000	77	F9XNV5
F9XNV8	24.102	24.1239	24.398	23.7988	24.4594	24.6621	-0.0987619		0.130836			NaN	9	9	9	24.7	86.104	0	19.568	242960000	22	F9XNV8
F9XNY0	23.4372	24.7697	23.9991	24.671	24.3077	24.971	-0.581261		0.603906	+		-0.984802	2	2	2	20	15.891	0	47.766	275340000	30	F9XNY0
F9XNY1	25.2049	23.6106	25.0348	24.6391	24.3836	23.5579	0.423237		0.283554			NaN	11	11	11	40.3	49.713	0	37.564	391160000	27	F9XNY1
F9XNY8	24.4315	24.4677	24.6554	23.8426	24.1947	23.9449	0.524139		1.85525			NaN	5	5	5	23.8	44.861	0	8.1972	191820000	12	F9XNY8
F9XNZ0	22.5438	22.7579	23.3403	22.4493	22.7355	21.5737	0.627835		0.674219			NaN	4	4	4	6.2	102.04	0	8.2888	57244000	6	F9XNZ0
F9XP09	20.4136	20.2534	20.7023	20.5751	20.8855	20.1489	-0.08004		0.116067			NaN	NaN	NaN	NaN	12	NaN	NaN	NaN	NaN	NaN	F9XP09
F9XP13	26.4438	21.4375	21.8345	NaN	23.3062	NaN	-0.0676079		0			NaN	2	2	2	3.2	139	0.0059524	1.7364	231600000	3	F9XP13
F9XP22	23.9528	23.0885	24.2135	23.4072	23.1051	22.8817	0.620279		0.766444			NaN	1	1	1	1.8	105.34	0.0036541	1.8721	105110000	7	F9XP22
F9XP24	21.7585	21.4183	22.9706	22.036	22.5443	22.3243	-0.252426		0.196563			NaN	2	2	2	10.3	31.877	0	5.5234	45127000	10	F9XP24
F9XP27	28.4672	28.8389	28.0428	28.7651	29.023	28.7523	-0.397181		0.739565			NaN	23	23	23	42.9	86.994	0	323.31	4571000000	132	F9XP27
F9XP28	23.7287	23.2836	23.295	22.9532	23.3123	23.2978	0.248011		0.590182			NaN	3	3	3	40.9	16.586	0	21.4	97047000	14	F9XP28
F9XP40	NaN	23.1802	22.0093	21.5307	22.1199	23.1515	0.327349		0.15961			NaN	3	3	3	19.8	42.041	0	6.1663	59288000	8	F9XP40
F9XP45	22.8047	22.494	22.9136	22.1249	23.234	24.0943	-0.413665		0.285974			NaN	4	4	4	47.4	21.765	0	10.778	214590000	14	F9XP45
F9XP52	24.0924	24.0319	23.9645	23.9553	24.1836	23.8594	0.0301723		0.105587			NaN	6	6	6	20.2	49.849	0	28.198	154300000	16	F9XP52
F9XP57	NaN	23.264	23.733	22.9661	22.7029	23.2686	0.519342		0.811576			NaN	1	1	1	5.3	52.344	0	2.4666	73105000	3	F9XP57
F9XP62	22.5537	20.3949	23.2565	23.1461	23.5937	22.8125	-1.11576		0.55542			NaN	1	1	1	8.6	14.324	0	16.085	66562000	8	F9XP62
F9XP67	22.3872	23.9824	23.4358	23.4319	23.3653	23.2032	-0.0650107		0.0470575			NaN	7	7	7	10.9	132.38	0	8.3449	824380000	6	F9XP67
F9XP76	24.6029	24.131	24.3629	24.2205	24.2569	24.0964	0.174295		0.530819			NaN	5	5	5	20.5	48.177	0	22.241	187150000	31	F9XP76
F9XP97	21.071	20.571	21.1679	19.9598	20.1289	19.7329	0.996058		1.99102			NaN	1	1	1	6.9	25.367	0.0036276	1.8312	13799000	6	F9XP97
F9XPA1	22.8331	21.8481	23.2575	21.9782	21.2766	21.8414	0.947549		0.944242			NaN	1	1	1	11.3	29.32	0	2.4529	46726000	5	F9XPA1
F9XPA2	25.8075	24.4097	24.901	25.0361	24.9077	24.2797	0.29822		0.250774			NaN	5	5	5	38.3	34.095	0	31.359	322180000	32	F9XPA2
F9XPA8	25.5453	25.8807	25.6782	25.424	25.8927	25.8954	-0.0359688		0.0680467			NaN	7	7	7	48	27.109	0	50.484	489130000	29	F9XPA8
F9XPB6	24.1708	23.9407	23.8595	24.501	24.2977	24.1695	-0.332393		1.16476			NaN	5	5	5	23.9	39.164	0	37.463	171250000	24	F9XPB6
F9XPD6	22.919	23.3452	23.9674	23.5541	23.3008	22.9124	0.154743		0.162988			NaN	3	3	3	10.6	39.616	0	29.685	96611000	13	F9XPD6
F9XPE0	21.712	21.2729	21.1577	21.1085	NaN	21.5375	0.0579033		0.0735839			NaN	4	4	4	28.1	22.047	0	9.7435	56165000	5	F9XPE0
F9XPG5	24.0081	23.3003	23.6663	23.1769	23.4017	23.2646	0.377202		0.813626			NaN	3	3	3	13.3	40.187	0	7.1492	105880000	9	F9XPG5
F9XPI3	23.4953	23.518	24.1122	23.7038	23.6538	23.2978	0.156698		0.261342			NaN	6	6	6	14.1	73.374	0	12.329	127850000	14	F9XPI3
F9XPI7	23.3606	23.9182	23.7588	23.8781	23.2946	23.0161	0.282911		0.39391			NaN	2	2	2	8.7	39.486	0	7.5589	127290000	8	F9XPI7
F9XPJ5	24.1645	24.2878	24.1378	24.5264	24.3325	24.3703	-0.212999		1.32568			NaN	8	8	8	18.4	84.306	0	14.485	190280000	27	F9XPJ5
F9XPM4	24.7853	24.7414	24.8248	24.9978	25.0123	24.5928	-0.0837873		0.236082			NaN	7	7	7	36.3	45.807	0	25.626	265300000	17	F9XPM4
F9XPM5	25.289	24.7762	25.5843	25.1688	25.2128	25.4573	-0.0631434		0.0889058			NaN	6	6	6	23.8	60.376	0	103.51	411790000	22	F9XPM5
F9XPS1	21.1711	21.3594	21.7675	NaN	21.4605	NaN	-0.0278276		0			NaN	1	1	1	1.5	115.91	0.0013141	2.3049	25789000	5	F9XPS1
F9XPS3	27.2259	27.2101	26.9038	25.8611	26.1012	26.2395	1.04598	+	2.62752	+	+	0.100077	5	5	5	28	27.45	0	196.64	1123000000	64	F9XPS3
F9XPT2	26.6039	26.441	26.5455	26.4139	26.1945	26.1281	0.284613		1.34934			NaN	15	15	15	30	75.928	0	109.8	863050000	49	F9XPT2
F9XPX7	24.4808	23.9391	24.2767	24.9014	24.7445	24.6474	-0.532213		1.4205			NaN	6	6	6	11.2	101.69	0	16.668	168640000	11	F9XPX7
F9XPY2	20.5575	20.9798	20.7843	20.4242	20.9431	21.081	-0.0422306		0.0626342			NaN	1	1	1	1.6	73.19	0	2.4662	18017000	10	F9XPY2
F9XPY3	23.2952	25.2422	25.6253	25.4427	25.6297	25.3208	-0.743519		0.438628	+		-0.978008	5	5	5	22.9	29.381	0	26.594	422340000	30	F9XPY3
F9XQ12	24.7885	24.1972	25.081	24.3253	24.4904	24.2034	0.349168		0.568685			NaN	6	6	6	10.3	106.82	0	55.852	207960000	16	F9XQ12
F9XQ15	23.3392	23.2336	22.8002	23.3365	23.5623	22.9577	-0.16117		0.266813			NaN	4	4	4	14.6	44.185	0	4.1885	99328000	5	F9XQ15
F9XQ51	22.8965	21.9467	22.7898	25.3687	21.4657	22.1774	-0.459636		0.137225			NaN	4	4	4	22.6	35.195	0	14.805	108850000	7	F9XQ51
F9XQ76	23.9905	23.6206	24.2277	23.0311	23.4078	23.4578	0.647383		1.36176			NaN	4	4	4	14.3	56.87	0	40.074	117200000	15	F9XQ76
F9XQ77	23.3705	23.2078	23.8881	22.7356	23.4788	22.95	0.434004		0.651156			NaN	2	2	2	7.8	42.129	0	12.049	91917000	13	F9XQ77
F9XQA6	28.1783	28.6216	27.8154	29.2734	28.6662	28.355	-0.559781		0.718018			NaN	8	8	8	32	22.161	0	15.113	3612100000	47	F9XQA6
F9XQB5	26.5882	26.6928	26.4885	26.9733	26.6435	26.1982	-0.015152		0.0217725			NaN	3	3	3	37.8	8.8804	0	88.71	955170000	27	F9XQB5
F9XQB8	24.3644	23.2664	24.2056	23.0258	23.137	22.6063	1.02243		1.26644			NaN	1	1	1	6.8	21.271	0	14.153	99468000	14	F9XQB8
F9XQC1	23.7801	23.1765	23.6988	23.9807	23.3249	22.5695	0.260138		0.226398	+		-0.974082	1	1	1	9.4	17.954	0	17.178	130620000	15	F9XQC1
F9XQE2	24.6116	23.1833	24.1195	23.2191	23.5487	22.9138	0.744251		0.747272			NaN	1	1	1	13.8	13.063	0	24.897	117720000	8	F9XQE2
F9XQF3	21.3027	20.9654	21.3242	20.79	21.1974	20.9286	0.22544		0.60601			NaN	1	1	1	7.1	22.012	0	4.8365	19356000	1	F9XQF3
F9XQS6	25.1548	24.5179	24.9184	25.2959	24.642	24.0891	0.188076		0.181121			NaN	1	1	1	11.9	15.469	0	2.4521	256000000	4	F9XQS6
Q1KTF2	25.0303	25.3228	25.405	24.9426	24.5851	25.0113	0.406396		1.09632			NaN	6	6	6	30	40.767	0	27.352	329170000	20	Q1KTF2
														6

## Sheet: NMTi treated-Myristate enriched
Gene names	126 - DMSO/YnMyr				127 - 8 µM IMP-1088/YnMyr				128 - 16 µM IMP-1088/YnMyr				129 - 32 µM IMP-1088/YnMyr				130 - 64 µM IMP-1088/YnMyr				131 - 30 µM Myr/YnMyr				Normalized 126 - DMSO/YnMyr				Normalized 127 - 8 µM IMP-1088/YnMyr				Normalized 128 - 16 µM IMP-1088/YnMyr				Normalized 129 - 32 µM IMP-1088/YnMyr				Normalized 130 - 64 µM IMP-1088/YnMyr				Normalized 131 - 30 µM Myr/YnMyr				Average log2 difference (DMSO vs Myr)
A9Y5H1	13.5927	14.0742	12.4238	12.9276	13.9802	14.3521	12.6279	12.9508	13.8493	13.3378	12.5622	12.7861	14.2253	13.9086	12.3647	12.9364	14.0934	13.6907	12.5153	13.0454	14.6103	13.8211	12.4066	13.4201	0.0932172	-0.0400047	0.0652598	0.0416563	0.0450362	0.069801	0.0115888	-0.0699646	-0.02932	0.0344162	-0.00554255	0.0396199	0.0382002	0.0633107	0.0138436	-0.0493478	0.106267	0.0334293	0.041779	0.00253586	-0.277178	-0.166156	-0.166887	0.10444	0.166477
A9Y5H2	13.3818	15.0042	14.1294	13.4495	13.8129	15.1284	14.4138	13.4936	13.7575	13.9846	14.4265	13.4152	14.3534	14.562	14.1443	13.6194	14.205	14.6012	14.0411	13.7049	14.6516	14.8205	14.3084	13.9624	-0.0861348	0.0705373	0.0104128	-0.0328699	-0.0907872	0.0266365	0.0369544	-0.123639	0.00331438	0.13823	-0.0658302	-0.132953	0.197796	-0.102674	0.0329284	0.0372207	0.249328	0.124616	-0.192899	0.0656125	-0.204373	0.013837	-0.0256265	0.050361	0.0319366
A9Y5H7	11.5158	13.3269	11.0188	11.0782	12.1914	13.6525	11.1649	11.5155	11.9414	12.827	11.1658	10.9846	12.1664	13.3446	10.9405	11.3215	12.0752	13.1554	10.9635	11.4699	12.6519	13.1697	11.0604	11.4344	-0.0154515	-0.16932	0.0913971	-0.0973427	0.224381	-0.011744	-0.0202973	0.205104	-0.120493	0.0691538	0.0547398	0.146962	-0.0524621	0.117363	0.020651	0.0461255	0.0562023	0.116191	-0.0788961	0.137478	-0.26741	-0.199452	-0.0820085	-0.170871	0.132256
A9Y5I3	8.37012	9.7937	12.1497	9.02406	9.71461	10.57	12.6577	7.50811	9.00728	7.62637	12.1983	8.52927	9.70264	9.84318	11.9642	9.17871	9.09318	9.65446	12.4085	8.08582	10.75	10.0316	12.2801	9.49388	-0.510439	-0.0430093	-0.00186478	0.512527	0.398327	0.565158	0.248452	-1.13826	0.0882481	-0.122521	-0.228657	-1.39426	0.134471	0.275434	-0.179664	0.567392	-0.275058	0.274753	0.141986	-0.582573	0.481356	0.321919	-0.0863889	0.552665	-0.328085
F9WW35	15.8224	16.2231	15.5978	15.6681	16.2651	16.5885	15.7374	15.8493	16.2052	15.6648	15.7911	15.7228	16.6589	16.3465	15.6474	15.8677	16.4461	16.0347	15.7407	15.9817	17.7007	16.5421	15.9706	16.407	-0.134884	-0.26032	-0.0247779	-0.122848	-0.127966	-0.0630571	-0.142966	-0.0765418	0.00235467	-0.000725083	-0.107467	-0.00258571	0.0139138	0.132054	0.0323971	-0.0230643	0.00107345	0.008242	0.00311863	0.0338119	0.355329	0.185668	0.132953	0.186288	-0.350767
F9WW39	14.1188	14.4785	13.5907	13.1843	14.5787	14.5584	13.6356	13.3301	14.5807	13.3832	13.4194	13.0534	14.753	13.8406	13.1277	13.2099	14.5339	13.6516	13.2279	13.157	15.8932	14.1673	13.8446	13.4588	-0.0651878	0.215053	0.241282	0.0771558	-0.0409591	0.126878	0.0284084	0.0881222	0.0167567	-0.0992539	0.041327	-0.0641475	-0.118568	-0.153859	-0.214113	0.00298886	-0.137767	-0.154782	-0.236503	-0.107021	0.321155	0.0308575	0.28018	-0.0780023	-0.021472
F9WW40	13.393	14.648	13.0734	13.9403	13.3817	15.0249	13.4925	14.1716	13.3987	14.294	13.315	14.158	14.0179	14.7426	13.2935	14.2266	13.7046	14.5998	12.7775	14.3935	14.7923	14.8725	13.3319	14.5647	0.170686	-0.299112	-0.0156277	-0.17703	-0.276343	-0.0902908	0.145655	-0.0805359	0.111141	0.0566925	-0.178935	0.162931	0.108028	0.0644537	0.212041	0.00950356	-0.00542807	0.10967	-0.426603	0.119256	0.181993	0.0523472	0.0278418	0.0176648	-0.150233
F9WW44	11.7871	13.6084	9.41204	6.75475	12.2641	13.5985	9.47241	NaN	12.1703	12.4908	9.4477	7.94468	12.5104	13.1309	9.33418	7.67927	12.112	12.8895	8.97937	NaN	13.3997	13.315	9.81925	7.71149	-0.027716	0.186032	0.126121	NaN	0.0134986	0.0080972	-0.0712876	NaN	NaN	-0.00748171	4.91589e-05	-0.115449	0.00794043	-0.0225011	0.0558843	NaN	-0.19057	-0.0758466	-0.421565	NaN	0.196798	0.019667	0.318329	NaN	-0.083452
F9WW45	NaN	9.03433	8.96391	8.74672	8.57353	9.94563	9.91046	10.02	6.95489	9.58596	10.0211	9.25685	8.64371	10.1233	10.1499	10.2482	7.83004	8.90268	10.1799	9.75842	NaN	8.54709	9.53103	8.7501	NaN	-0.572336	-0.703904	-0.591551	NaN	0.170885	-0.0151219	0.546902	-0.0109152	0.184043	NaN	0.795379	NaN	0.785639	0.489683	0.810107	NaN	-0.246984	0.397085	0.263298	NaN	-0.932582	-0.351785	-1.01784	0.144806
F9WW56	13.8058	14.3485	14.3055	13.5132	14.2329	14.8073	14.5248	13.9268	14.3268	13.8396	14.3592	13.5111	14.6282	14.347	14.2544	13.8866	14.4154	14.265	14.3246	13.9875	15.1432	14.4764	14.4181	14.187	-0.0604773	-0.248936	0.0659585	-0.197019	-0.0691704	0.0417159	0.0274795	0.0816677	-0.128612	-0.049598	0.105082	0.0582306	0.0742869	0.0185029	0.0225256	0.0765095	0.0614132	0.124579	-0.0299443	0.12042	-0.111135	0.00590721	-0.0364213	0.047034	-0.0864647
F9WW67	13.7154	15.6365	14.8993	14.7238	14.1016	15.6697	15.2945	15.0407	14.1509	14.7195	15.1809	14.7249	14.4859	15.3855	15.124	14.952	14.3273	15.3188	15.2918	15.0388	15.1546	15.468	15.175	15.0351	-0.0481356	0.0200186	-0.136751	-0.0702903	-0.0976326	-0.114831	0.000725001	0.111725	0.00128193	-0.0243592	0.0319205	-0.0809083	0.034722	0.0379258	0.0956074	0.058065	0.0761038	0.159303	0.140792	0.0878644	0.00302207	-0.0215078	-0.0760142	-0.188646	0.0119969
F9WW71	9.00582	8.99884	10.0444	NaN	9.3557	8.30177	9.69834	NaN	9.54073	6.57557	9.47889	NaN	10.0957	7.78208	9.73816	NaN	9.36118	7.64017	9.95021	NaN	10.9108	7.70093	9.98996	NaN	-0.146756	0.915455	0.352642	NaN	-0.232593	0.0502994	-0.251187	NaN	NaN	-0.382127	0.032775	-0.69173	0.255474	-0.0323475	0.0540275	NaN	-0.279078	0.0137899	0.14344	NaN	0.370178	-0.255466	0.0832049	NaN	0.307808
F9WW88	10.3148	12.7273	11.951	12.259	10.3018	12.882	12.5193	12.1763	10.4979	11.8992	12.2551	12.2231	10.8908	12.41	11.9914	12.5314	10.4946	12.3935	12.5805	12.4059	10.9634	12.6831	12.4618	12.6815	0.296671	-0.022025	-0.217239	0.0046146	-0.152019	-0.0354598	0.0932487	-0.212963	0.0391805	-0.082476	0.124336	-0.034039	0.185048	-0.070383	-0.169233	0.177143	-0.0112609	0.101133	0.297212	-0.00542064	-0.442774	0.0607743	0.0784869	-0.00255424	0.0920221
F9WW94	8.34855	10.0835	8.04418	10.2888	8.34545	10.3421	9.34682	10.7034	9.28533	10.1944	8.55017	10.3053	9.44419	10.1271	9.12707	10.3921	9.79049	9.98755	9.13479	10.6168	10.1956	9.90522	7.43062	10.8783	-0.327318	-0.273317	-0.436525	-0.116907	-0.766138	-0.182803	0.608349	0.162888	-0.0298881	-0.0997959	0.254087	0.653681	0.080708	0.0392566	0.653986	-0.113346	0.626949	0.0877587	0.539072	0.0543083	0.131713	-0.324576	-1.26509	0.0429449	0.0652343
F9WWA4	15.1329	15.7993	15.9075	16.1907	15.5291	16.4206	15.9415	16.4567	15.4461	15.6176	15.8092	16.266	15.8485	16.1979	15.5126	16.3183	15.49	15.7063	15.4073	16.3055	16.6922	16.05	15.858	16.7917	0.00218719	-0.416189	0.293097	-0.0723851	-0.0373782	0.0370738	0.0693048	0.0588281	0.0735032	0.0254981	-0.0400168	0.218226	0.0301866	0.251424	-0.0942518	-0.0444831	-0.128395	-0.0521048	-0.322173	-0.114442	0.173416	-0.0384298	0.0285249	0.0989787	-0.113945
F9WWA5	10.7456	11.1777	12.0742	13.649	11.8042	11.8061	12.3791	13.6192	11.2366	8.66089	12.2462	13.2282	11.6387	10.3307	11.991	13.4818	11.3591	10.4034	12.4009	13.4301	12.8732	11.6077	12.6564	13.7846	-0.304914	0.263128	-0.092221	0.241994	0.317989	0.723462	-0.0450352	0.0773116	-0.108359	-0.0894847	-0.169268	-1.43763	-0.0994058	-0.314948	-0.167785	-0.0250298	-0.179036	-0.0541574	0.119524	-0.133835	0.434634	0.820141	0.275002	-0.0520811	-0.342427
F9WWA8	13.4324	13.5547	10.0303	11.7567	14.0682	14.149	10.3121	11.9314	13.9185	13.1117	10.5879	11.7403	14.0635	13.7453	10.1005	11.9673	13.7074	13.138	10.0158	11.9998	15.7145	13.6942	10.5564	12.2874	-0.159255	-0.260937	-0.112005	-0.0653587	0.0408051	0.165226	-0.0879437	-0.025477	-0.0112053	0.276348	-0.0285525	0.112149	-0.215796	0.19857	-0.0341074	0.0455033	-0.371984	-0.220607	-0.241439	0.02089	0.734784	0.0056006	0.199147	0.0356477	-0.393184
F9WWB1	14.5928	16.2819	15.2998	15.4069	14.6114	16.0491	15.1211	15.076	14.3473	15.2903	14.7414	14.7241	14.0782	15.5888	14.0539	14.6076	13.7958	15.1805	13.8344	14.4774	14.3508	15.5485	14.2994	15.0539	0.855802	0.375187	0.866376	0.641008	0.438704	-0.0256069	0.429914	0.175281	0.0287333	0.138708	0.254962	0.199724	-0.34638	-0.0489382	-0.371895	-0.258091	-0.428846	-0.269212	-0.714081	-0.445277	-0.774241	-0.231154	-0.349023	-0.141655	1.05861
F9WWD0	12.2697	12.0269	11.8628	13.2095	12.3513	12.121	12.4338	13.2444	12.1177	11.1716	12.3413	13.0669	12.5855	11.75	12.1628	13.3467	12.5342	11.459	12.5539	13.3045	12.9993	11.7966	12.4999	13.419	0.352481	0.0558685	-0.321433	0.0694446	-0.00164866	-0.0181017	-0.00811493	-0.0304852	-0.00265229	-0.0121563	-0.154901	0.0166681	-0.019307	0.0479626	-0.013766	0.106806	0.129353	-0.0550074	0.254717	0.00758096	-0.305977	-0.0473902	0.100754	-0.150694	0.139917
F9WWD2	14.9128	15.4304	14.9529	14.9644	15.1661	15.5497	15.2434	14.8938	14.8337	15.1223	15.2117	14.7417	14.9955	15.361	15.0864	14.9865	14.9068	15.1908	15.2012	15.2111	15.1549	15.2264	15.3542	15.1538	0.476938	-0.133215	-0.0971538	0.0976559	0.2945	-0.18199	-0.0644172	-0.107838	-0.0545916	-0.00768182	0.0424004	0.374829	-0.128056	0.0663764	0.0439702	0.0199422	-0.0167383	0.0841549	0.0361151	0.187495	-0.669045	-0.210155	0.0891675	-0.142663	0.31923
F9WWE1	16.7444	17.734	16.9627	17.6517	16.9893	17.5429	17.3144	17.693	16.9527	16.5952	17.1511	17.3701	17.3329	17.1573	17.1097	17.5879	17.2333	16.9605	17.5173	17.642	18.0765	17.3495	17.2403	17.8055	0.0819627	0.260579	-0.128284	0.151758	-0.108881	-0.0985593	-0.0343723	0.058221	-0.0593157	-0.109232	-0.0651502	-0.062072	-0.0171398	-0.0471407	0.0263257	-0.0117785	0.0832191	-0.0559048	0.311264	-0.0148026	0.0259894	0.00309736	-0.0657013	-0.124083	0.131678
F9WWE6	12.5765	13.3541	13.2953	13.7195	12.601	13.5727	13.6012	13.7759	12.6887	12.2135	13.2978	13.4818	13.0425	12.8724	13.013	13.6479	12.8273	12.2969	13.2525	13.7823	14.1958	13.1063	13.4872	13.9743	0.146896	0.201312	0.095751	0.114318	-0.264302	0.251819	0.143828	0.0359018	-0.0528729	-0.071077	-0.0962095	-0.123242	-0.0746425	-0.0114715	-0.178994	-0.0570612	-0.0898985	-0.398934	-0.0621283	0.0202456	0.378156	0.0805155	0.0726196	-0.060531	0.0218794
F9WWF9	10.9747	NaN	10.1968	10.5255	11.4285	NaN	10.5091	10.6715	11.3193	NaN	10.5642	10.5718	11.4171	NaN	10.1568	10.7136	11.1522	NaN	10.4212	10.9741	12.6148	NaN	10.3243	10.925	0.0493523	NaN	-0.0403346	-0.0796161	0.0673974	NaN	0.0141249	-0.0684352	0.0372156	0.157797	0.0385519	NaN	-0.195896	NaN	-0.0727211	0.00862952	-0.260868	NaN	0.0690277	0.212061	0.301463	NaN	-0.127894	-0.109854	-0.0447708
F9WWH2	15.9165	16.8215	15.4104	16.0608	16.3796	17.4451	15.4094	16.3116	16.2016	16.608	15.4395	16.1351	16.5024	17.2388	15.2128	16.2689	16.2412	16.6241	15.253	16.4097	17.2749	16.7802	15.327	16.5718	0.0562125	-0.348271	0.193262	-0.107092	0.0836322	0.107201	-0.0655064	0.00886006	0.037762	0.05315	-0.0140285	0.254317	-0.0455412	0.337998	0.00333494	0.00124427	-0.106792	-0.0886524	-0.0791385	0.0850083	0.0265168	-0.262593	-0.105102	-0.0257823	0.0402677
F9WWH6	11.178	12.5844	11.4107	12.5103	11.3679	12.7062	12.0105	12.5392	11.5056	11.5412	11.6699	12.3509	11.6827	12.5065	11.6902	12.5018	11.5721	12.3232	11.9972	12.39	12.4279	12.5613	11.8203	12.7178	0.114739	-0.0361858	-0.23088	0.133789	-0.131171	-0.0825176	0.11114	0.0277895	0.0448631	-0.14095	0.0869337	-0.263326	-0.0681809	0.154809	0.0562484	0.0254171	0.0211039	0.159566	0.240692	-0.143432	-0.0234247	0.0676535	-0.0362506	-0.0884272	0.0154779
F9WWH9	15.7127	17.0175	16.3447	17.2401	16.3119	17.0222	16.6621	17.3168	15.9431	15.7759	16.4666	16.8429	15.9246	16.2711	15.6422	16.6666	15.539	15.8095	15.5132	16.3095	16.0129	15.9537	15.5084	16.6034	0.36439	0.459004	0.446779	0.535354	0.527926	0.295592	0.506332	0.477188	0.208635	0.399355	0.239413	0.0335296	-0.111304	-0.0184566	-0.248165	-0.137937	-0.296999	-0.29193	-0.49976	-0.552186	-0.723426	-0.477739	-0.60454	-0.531054	1.03557
F9WWI5	15.4674	17.1062	16.1543	16.8175	15.7842	17.0375	16.4076	17.0709	15.5853	16.0172	16.1186	16.7342	16.1279	16.5123	15.9805	17.0646	15.944	16.5274	16.1123	17.18	16.6391	16.8233	16.3573	17.298	0.101855	0.185357	0.0907945	-0.0848792	-0.0170783	-0.0514176	0.0862664	0.0336025	-0.0976727	-0.114199	-0.135681	-0.0875068	0.0747242	-0.139558	-0.0753934	0.0623503	0.0907201	0.063657	-0.0662474	0.120735	-0.11454	0.029468	0.0787793	-0.0341361	0.083389
F9WWJ1	16.4337	17.1024	16.6306	16.5931	17.0085	17.4006	16.6903	16.7023	16.9167	16.4116	16.4916	16.5237	17.1904	16.9614	16.2643	16.6593	16.9958	16.4937	16.3602	16.6227	18.1728	17.024	16.7133	17.1189	-0.126875	-0.0467341	0.230415	0.0148962	0.0122449	0.0833982	0.0323859	-0.0107891	0.0159709	-0.0777842	0.00076966	0.0785495	-0.0578178	0.0812433	-0.128258	-0.0187234	-0.052462	-0.198347	-0.154922	-0.112352	0.22414	0.00189033	0.0981638	0.110998	-0.0908726
F9WWJ5	11.086	14.8847	12.048	12.9688	11.5338	14.8896	12.2854	12.9847	11.1361	13.8533	12.2926	12.9739	11.716	14.4738	12.1338	12.8833	11.36	14.1803	12.1528	13.0307	12.3481	14.5678	12.2197	13.2315	0.115071	0.159612	-0.0157592	0.0818066	0.127116	-0.00361314	-0.0361755	-0.037211	0.157415	0.0594831	-0.190215	-0.0556839	0.0574635	0.0177104	0.0776011	-0.103558	-0.0985854	-0.0877782	-0.0259934	-0.0131963	-0.0108499	-0.0302475	-0.0591561	-0.0852562	0.13156
F9WWL0	11.6207	12.3004	12.828	12.2894	12.1723	12.5144	13.1752	12.2279	11.9155	11.8038	13.0369	11.9977	12.19	12.378	13.0157	12.4154	12.2602	12.0848	13.0726	12.3225	12.5052	12.7347	13.2504	12.5918	0.0690884	-0.252451	-0.110206	0.107068	0.184994	-0.206546	-0.0208063	-0.0892681	-0.114131	-0.0705935	0.00854051	0.0670643	-0.0491886	0.0940977	0.0851263	0.133288	0.220977	-0.0110181	0.0193489	-0.0167123	-0.434411	0.308853	0.09713	-0.0202441	-0.0344572
F9WWM2	14.1989	13.867	13.3414	14.3231	14.5987	14.5646	13.3688	14.4596	14.7024	13.4566	13.4675	14.3043	14.93	13.932	13.2807	14.4234	14.6788	13.5355	13.1629	14.4591	16.2028	13.9129	13.527	14.825	-0.127297	-0.261274	0.10826	-0.0175784	-0.163229	0.268222	-0.122115	-0.0158484	0.0341537	0.0650923	0.0208644	0.144437	-0.0838132	0.0727279	0.0551694	-0.017045	-0.135059	-0.135738	-0.18527	-0.0383796	0.488535	-0.0883759	0.0788632	0.0546977	-0.207902
F9WWM6	9.27959	7.37182	6.95861	11.6193	9.93807	7.93062	7.68874	12.0787	9.34461	6.71493	NaN	11.9668	9.56421	8.45047	7.56041	12.0359	9.55259	8.04012	7.71569	12.2385	9.75797	7.25682	7.52223	13.1589	0.265819	-0.505806	NaN	-0.438604	0.488578	-0.115089	NaN	-0.114027	-0.0206063	NaN	-0.0245389	-0.346605	-0.137171	0.841803	NaN	-0.121833	0.0511461	0.619505	NaN	0.0237294	-0.643832	-0.493807	NaN	0.671341	-0.0707641
F9WWN3	11.5987	NaN	8.69533	10.9157	12.0899	9.11588	8.01731	10.3223	11.6771	5.97391	8.81413	9.67451	12.2048	8.36824	8.27449	10.3337	11.9529	NaN	9.48635	10.7874	12.5288	7.55228	8.96659	10.9503	0.149039	NaN	0.111203	0.543512	0.204576	NaN	-0.824594	-0.184791	-0.627202	0.0607389	-0.127848	NaN	0.067527	NaN	-0.302015	-0.138295	0.0155908	NaN	0.787209	0.258336	-0.308884	NaN	0.167458	0.148441	0.26558
F9WWN9	12.3523	14.6028	8.10135	8.90566	12.7021	15.0843	8.18056	8.99879	12.7107	14.0407	7.07756	8.44373	12.9246	14.7915	6.57033	8.25172	12.6259	14.1551	6.49929	9.02212	13.8403	14.4841	8.17333	9.08656	0.0520372	-0.173823	0.792517	0.246005	-0.0338816	0.139649	0.613953	0.204296	-0.145415	-0.40053	0.0550956	0.0802274	-0.0632835	0.2839	-0.730881	-0.507724	-0.16199	-0.164439	-0.924554	0.205607	0.152022	-0.165514	0.649495	-0.00276929	0.0708758
F9WWP1	11.45	14.8046	13.6102	14.7311	12.0966	14.1463	14.3514	14.992	11.9714	12.8664	13.857	14.5815	12.317	13.5371	13.694	14.9242	12.5311	13.9366	14.3815	14.9771	12.6444	14.224	14.2082	15.2421	-0.159361	0.635252	-0.28194	-0.0518318	0.0515295	-0.191084	0.201491	0.074285	-0.130884	-0.204414	0.00665271	-0.486872	0.020101	-0.363275	-0.190505	0.0415332	0.434053	0.224312	0.374372	0.0374028	-0.352975	0.181667	0.100996	0.0294946	0.0457341
F9WWP3	10.153	13.2086	12.2281	NaN	10.56	13.4675	12.7402	NaN	10.5854	13.4658	13.2265	NaN	10.7588	13.9642	13.0789	NaN	10.6146	13.877	13.2001	NaN	10.9314	13.7459	12.8485	NaN	0.111557	-0.663065	-0.534038	NaN	0.0828386	-0.572253	-0.27975	NaN	NaN	0.295117	0.188567	0.410261	0.0297084	0.361472	0.324337	NaN	0.0854525	0.462353	0.322968	NaN	-0.498123	0.00123198	-0.128634	NaN	-0.15334
F9WWP5	11.2233	13.3332	12.061	12.5679	12.0713	13.5331	12.258	12.4353	11.6878	12.588	12.1372	12.2323	12.2235	12.9909	11.8706	12.4322	11.9882	12.7648	11.8277	12.6002	13.1322	13.1377	12.0912	12.7621	-0.272026	0.0250501	0.144922	0.187992	0.140305	0.0568996	0.0841597	-0.0794511	-0.0770851	0.0519068	-0.162912	0.0959953	0.0406058	-0.0482427	-0.0378272	-0.0475066	0.00520635	-0.0862894	-0.203317	0.0634877	0.248821	-0.0434129	-0.0398445	-0.0474373	-0.00804688
F9WWR1;F9XAC6	15.9396	16.9926	15.6793	16.6902	16.2901	16.9431	15.9194	16.7615	16.1159	16.1214	15.8445	16.4679	16.4357	16.6396	15.7818	16.6216	16.3252	16.3014	15.9957	16.6982	17.287	16.7775	15.975	16.9768	0.0997198	0.113154	-0.0617806	0.11259	0.0145182	-0.104448	-0.079417	0.0490879	-0.0391747	-0.0658211	-0.0793355	0.0580926	-0.0917422	0.0291548	0.0483996	-0.0557988	-0.00227808	-0.121033	0.13969	-0.0362418	0.0591179	0.0250792	0.0189289	-0.0304629	0.0477552
F9WWS5	14.2065	14.2101	13.1355	13.4537	14.794	14.4434	13.6245	13.6327	14.7226	13.9601	13.7579	13.4031	14.8861	14.4657	13.5672	13.722	14.7445	14.3122	13.83	13.9008	15.4005	14.404	13.6164	14.2127	-0.0268124	-0.339286	-0.328173	-0.142051	0.124998	-0.27411	-0.0970118	-0.0978923	-0.122057	0.124955	0.133925	0.226757	-0.0348238	0.18523	0.111174	0.0264546	0.0234962	0.219826	0.251317	0.148206	-0.220783	-0.0184166	-0.0622608	0.187339	-0.18055
F9WWS7	14.1345	15.4832	15.0871	15.4785	14.7386	15.5331	15.4468	15.5925	14.6112	14.4959	15.3545	15.3103	14.9936	14.7717	15.0953	15.4419	14.9588	14.8924	15.3958	15.6469	15.6515	15.224	15.5518	15.8688	-0.15445	0.166302	-0.109862	0.0471626	0.0138927	0.0481819	-0.00793341	0.0262619	-0.0505509	-0.0117612	-0.0331346	-0.0049389	0.016993	-0.276175	-0.0940584	-0.0892373	0.182191	0.0324763	0.0838031	0.0586528	-0.025493	0.0341531	0.139812	0.00771093	-0.0517574
F9WWT7	9.85151	10.41	10.201	11.8184	9.0571	10.8018	10.2595	11.9166	10.055	8.63234	9.9884	11.6465	9.7679	9.85888	10.0274	11.9205	10.3896	9.15449	10.4155	12.2753	11.096	10.3139	10.1477	12.1508	0.374393	0.29796	0.152673	-0.0111512	-0.855742	0.52164	-0.0466144	-0.0478238	-0.112554	-0.229213	0.222514	-0.663637	-0.396828	0.0157754	-0.0133747	-0.00886309	0.424832	-0.500572	0.252169	0.288849	0.230831	0.328834	-0.115639	-0.108458	0.119577
F9WWU7	14.9851	15.8801	14.2913	15.1011	15.3693	15.9857	14.6661	15.2667	15.141	15.2169	14.5475	14.7137	14.8709	15.4744	13.772	14.4445	14.4646	14.9267	13.4504	14.072	14.5655	14.8361	13.5873	14.323	0.644767	0.243275	0.363775	0.572728	0.593253	0.180796	0.480799	0.603452	0.255775	0.450691	0.445295	0.396237	-0.157033	0.106545	-0.147915	-0.18368	-0.363386	-0.253114	-0.592115	-0.613195	-1.1629	-0.673739	-0.555236	-0.63508	1.21287
F9WWV8	12.5708	14.8314	12.411	14.0265	13.1338	15.0165	13.029	14.3276	13.0234	13.9893	12.9858	14.1298	13.32	14.4063	12.6029	14.197	13.0584	14.3081	13.0978	14.4285	14.1002	14.7235	13.1145	14.592	-0.0712144	0.0353326	-0.337597	-0.131931	0.056095	0.0524411	0.0226234	0.034259	0.0418978	0.0679089	0.0259955	0.00937015	-0.00967426	-0.120726	-0.138051	-0.0612599	-0.071315	-0.0308924	0.234177	0.113178	0.0701132	0.0544742	0.150939	0.00385666	-0.196198
F9WWW3	9.19638	9.98826	12.0996	NaN	8.63691	10.5953	12.2733	NaN	8.81535	7.33664	12.2062	NaN	10.1765	9.86634	11.9739	NaN	9.93684	9.62315	12.3224	NaN	10.1785	9.75834	12.2627	NaN	0.265354	0.210099	0.0348603	NaN	-0.729831	0.649017	-0.0492577	NaN	NaN	-0.0278283	-0.471051	-1.62543	0.557911	0.357138	-0.0832511	NaN	0.51814	0.301997	0.142554	NaN	-0.140523	0.107178	-0.0170768	NaN	0.186912
F9WWW5	14.4624	15.0841	14.3829	15.1035	14.8065	15.3766	14.5709	15.1863	14.7542	14.8776	14.4938	14.9578	14.9742	15.0906	14.3444	15.1787	14.7249	14.8368	14.2484	15.276	15.5209	15.1458	14.5266	15.5488	0.147589	-0.234661	0.0799702	0.0200884	0.0559952	-0.110211	0.0101649	-0.0319745	-0.0551164	0.0216027	0.0840469	0.374945	-0.028159	0.0408469	0.0490609	-0.00445314	-0.0775756	-0.024967	-0.169491	0.0357166	-0.181897	-0.0459533	0.00869261	0.0357391	0.0491013
F9WWX1	13.1365	13.6296	9.7703	13.0357	13.6356	13.6657	9.90171	12.8429	13.5647	12.6352	8.99763	12.9758	13.5723	13.0605	9.75867	12.9504	13.3805	12.8963	10.5642	12.7671	14.7044	13.3163	9.78111	13.2161	0.0299218	0.178825	0.0995947	0.196105	0.0932655	0.0468281	-0.0267691	-0.131531	0.206712	-0.842341	0.102748	0.000503242	-0.221885	-0.121255	0.0955867	0.0110658	-0.213837	-0.0974204	0.778526	-0.229261	0.209786	-0.00748096	-0.104597	-0.053091	0.114957
F9WWX6	14.583	14.6018	12.6314	14.2808	14.7965	15.0133	12.6682	14.4101	14.9276	14.343	12.618	14.2958	15.1127	14.7226	12.4783	14.4656	14.9638	14.3258	12.4408	14.4212	15.5402	14.6203	12.6499	14.6705	0.154789	-0.252809	0.175251	-0.0181083	-0.0674571	-0.0093967	-0.045731	-0.0236634	0.0674677	-0.0074922	0.144028	0.304429	-0.0031195	0.136917	0.0297613	0.0668968	0.047842	-0.0718342	-0.130447	-0.0345265	-0.276083	-0.107306	-0.0213416	-0.0580664	0.13048
F9WWY3	11.3424	13.1913	NaN	12.2794	11.7237	13.4144	NaN	12.4868	12.1254	12.6105	NaN	12.451	12.3059	12.795	NaN	12.6734	11.9249	12.5495	NaN	12.7896	13.2146	12.9691	NaN	13.1561	-0.204719	0.0195143	NaN	-0.234889	-0.259131	0.0745324	NaN	-0.162347	0.00724335	NaN	0.222965	0.254777	0.0711811	-0.107801	NaN	0.059361	-0.109825	-0.165329	NaN	0.11851	0.279529	-0.0756935	NaN	0.212121	-0.278683
F9WX29	14.3686	15.2453	14.3588	14.121	14.8229	15.3437	14.5837	14.2748	14.7821	14.292	14.4349	14.053	15.0159	14.8877	14.1799	14.2703	14.7555	14.6741	14.357	14.232	16.1164	15.0369	14.5621	14.5878	-0.0492664	0.0818148	0.0709645	-0.010415	-0.0306415	0.012181	0.0380722	0.00859366	-0.00788303	-0.0222007	0.00891054	-0.0553546	-0.0895129	-0.00677294	-0.100295	0.039122	-0.150057	-0.0323341	-0.0458352	-0.0561939	0.310567	0.000465855	0.0592944	0.0267763	-0.0760015
F9WX30	9.38204	10.0852	8.88542	12.1653	8.83523	10.5493	10.0003	11.9471	9.72889	8.61637	8.33776	11.714	8.83927	9.59268	9.19338	12.1261	8.84987	9.78893	10.0577	12.4536	10.3061	9.45072	9.7486	12.3682	0.61755	0.154511	-0.360197	0.161346	-0.36498	0.450526	0.496888	-0.191688	-0.219444	-1.07713	0.609023	-0.498241	-0.612833	-0.0690539	-0.0446214	0.0223613	-0.402293	0.315241	0.697089	0.292808	0.153534	-0.352982	0.287971	-0.0653828	0.137517
F9WX45	11.043	10.6083	NaN	11.0374	11.8498	10.774	NaN	11.2053	11.7016	10.1307	NaN	11.3648	11.7934	10.5038	NaN	11.492	11.8394	10.2674	NaN	11.2121	12.6638	10.6817	NaN	11.5221	-0.213083	-0.13622	NaN	-0.143103	0.157928	-0.13851	NaN	-0.110047	0.25484	NaN	0.0901234	0.202314	-0.150278	0.0283124	NaN	0.211649	0.0956533	-0.020096	NaN	-0.125239	0.0196562	0.0642006	NaN	-0.0880996	-0.162721
F9WX67	12.2423	13.0985	11.8242	13.5179	12.9119	13.2963	12.1979	13.8439	12.9932	12.3681	12.1147	13.594	13.3075	12.8399	11.8968	13.6885	13.1236	12.5041	11.929	13.72	14.0191	12.9729	12.0506	14.0937	-0.298273	0.00171396	-0.0531181	-0.0999703	-0.0643087	0.0314663	0.0628057	0.0911957	0.0465951	0.0681714	0.0973203	0.0874182	0.0793517	0.0120585	0.0271625	-0.0292083	0.095402	-0.135714	-0.0633323	-0.0547134	0.090508	0.00305715	-0.0416892	0.0461011	-0.136906
F9WX71	13.183	13.5868	12.3322	13.5418	13.5754	13.6958	12.6423	13.4476	13.3257	12.9822	12.756	13.1945	13.9484	13.6161	12.6808	13.5206	13.743	13.3444	12.879	13.5523	14.4041	13.4991	12.6737	13.7878	0.0454392	-0.11739	-0.203592	0.159484	0.0021573	-0.17654	-0.15122	-0.0695781	-0.117291	0.0510009	-0.167194	0.0940329	0.123213	0.18082	0.152628	0.0384887	0.117824	0.0972112	0.228227	0.0131124	-0.121439	-0.0781339	-0.0770443	-0.0242157	0.0461933
F9WX73	13.3738	15.3925	14.2884	13.864	13.4712	15.6072	14.2189	13.9823	13.6869	14.7743	14.169	14.0339	13.78	15.2755	14.0853	14.1632	13.5525	14.9689	14.121	14.3136	14.5509	15.2142	14.1026	14.4974	0.196982	-0.0630829	0.249115	-0.153297	-0.141386	-0.0164401	-0.0781507	-0.169848	0.0871559	-0.0395981	0.154727	0.134759	-0.0844164	0.0888288	0.0536084	0.0460967	-0.111962	-0.0297033	-0.0332834	0.139444	-0.0139444	-0.114362	-0.151691	0.0504479	0.114817
F9WX81	13.1727	15.6391	14.6815	15.2903	13.8112	15.5039	14.9186	15.4292	13.6395	14.2055	14.8566	14.9698	14.3103	14.7108	14.6352	15.2677	14.0994	14.9114	15.0383	15.2301	14.9584	15.2415	15.0811	15.4979	-0.266812	0.353585	-0.0621611	0.134598	-0.06405	0.0502456	-0.0828102	0.138658	-0.115403	-0.0562653	-0.155428	-0.263952	0.183214	-0.305762	-0.100849	0.0121279	0.172247	0.0829161	0.179643	-0.0824708	0.130829	0.082967	0.122443	-0.0875095	-0.0223799
F9WX89	11.7403	13.4917	12.8275	11.6302	12.3792	13.6304	13.0128	11.6315	12.1045	12.4829	13.0786	11.2893	12.5606	13.1139	13.0586	11.9076	12.6007	12.848	12.9301	11.8781	12.9457	13.1636	13.1081	12.1123	-0.0891429	0.119812	-0.050214	0.0138009	0.11404	0.0903831	-0.122688	-0.119673	-0.2566	0.0315905	-0.0802728	-0.0729176	0.0435328	0.0109824	0.188542	0.1914	0.283573	-0.0669126	-0.0625816	0.104817	-0.27173	-0.0813472	0.0153502	0.0662557	0.0664317
F9WX99	11.4428	14.1589	10.7908	10.906	12.3143	14.7193	11.758	11.0269	12.2558	14.0043	11.6379	10.9831	12.0015	14.4973	11.1079	11.1874	11.9233	14.2847	11.1472	10.3155	12.1954	14.4953	11.2802	11.7898	-0.0202919	-0.451209	-0.371343	-0.00368857	0.415449	-0.0588802	0.338141	-0.0175779	0.143965	0.306573	0.437288	0.210264	-0.149192	0.156117	-0.046608	0.177884	-0.0275183	0.131552	-0.129907	-0.751046	-0.655735	0.012156	-0.0968555	0.450463	-0.13914
F9WXA4	14.2555	15.3226	14.1875	14.3024	14.8746	15.5172	14.6351	14.4112	14.4545	14.5729	14.4202	14.0444	14.391	14.8097	13.5772	13.7104	14.0846	14.3024	13.5124	13.2338	14.503	14.3886	13.6163	13.6758	0.387398	0.253552	0.320973	0.531143	0.570779	0.280076	0.510787	0.505131	0.343691	0.384358	0.230968	0.319886	-0.164715	0.00959783	-0.281721	-0.160625	-0.271265	-0.30965	-0.469177	-0.694299	-0.753166	-0.553461	-0.46522	-0.525041	0.947488
F9WXB5	12.7585	NaN	11.6865	11.59	13.269	NaN	11.9156	11.7667	13.2725	NaN	11.8392	11.5576	13.6589	NaN	11.7727	12.0059	13.4759	NaN	11.527	12.0626	14.4085	NaN	11.7382	12.1147	-0.156315	NaN	0.0648481	-0.134451	-0.0815036	NaN	0.0362349	-0.0926223	-0.0964123	0.0482906	0.00229888	NaN	0.0564634	NaN	0.158698	0.181672	0.0733739	NaN	-0.209634	0.181284	0.105683	NaN	-0.0984371	-0.0394694	-0.0645649
F9WXB8	12.811	14.0149	13.9143	12.6773	13.05	14.146	14.1552	13.0164	12.8939	12.9939	13.8803	13.0755	13.5614	13.5994	13.6471	13.2533	13.244	13.3813	13.7372	12.9284	14.0011	13.6948	14.1865	13.6382	0.109804	0.126336	0.119093	-0.295761	-0.0869035	0.0893736	0.102241	-0.0914813	0.172917	-0.084211	-0.162656	-0.07852	0.172628	-0.020147	-0.140457	0.18047	0.05519	-0.0502772	-0.172964	-0.201591	-0.0880621	-0.066766	0.176298	0.235447	-0.0493612
F9WXD2	13.37	13.9105	13.4135	13.8163	13.5	14.5167	13.5146	14.0404	13.2989	13.7083	13.2457	13.8558	13.8811	13.9515	13.0229	13.9697	13.553	13.6233	13.145	13.9941	15.0779	13.877	13.5054	14.3803	0.148926	-0.270924	0.230556	-0.068039	-0.156829	0.167285	0.0738772	0.0212144	0.0420254	-0.106489	-0.277535	0.343039	-0.0275755	0.0390481	-0.152448	-0.0143669	-0.155728	-0.101063	-0.152992	-0.0470922	0.468742	-0.177386	0.107495	0.0662583	-0.106147
F9WXD6	8.21306	9.72862	9.30065	12.3879	8.41206	9.95238	9.14837	12.513	9.04753	9.53319	9.32611	12.137	9.43338	10.3395	8.06544	12.1887	9.70634	8.87086	9.26948	12.5717	10.1053	10.4154	8.51527	12.9168	-0.380812	-0.328209	0.488002	0.0605215	-0.617525	-0.272531	0.0779521	0.0507349	-0.119891	0.344201	0.0982894	0.292456	0.151901	0.55165	-0.739585	-0.238529	0.624796	-0.728962	0.341816	0.0874354	0.12335	0.485596	-0.512386	0.159727	-0.104196
F9WXG0	16.4487	17.2544	16.4751	17.5573	16.6234	17.2315	16.652	17.6947	16.5461	16.6608	16.5493	17.5137	16.8197	17.0297	16.4104	17.6859	16.5747	16.7103	16.45	17.8497	17.6216	17.0627	16.6165	17.9471	0.235447	0.012676	0.0744799	-0.0256811	-0.0255933	-0.178284	-0.00643757	-0.0231338	0.00123632	-0.0206451	-0.0225499	0.235149	-0.0812537	0.056936	0.0173875	0.00318404	-0.126279	-0.0743887	-0.065661	0.109901	0.0202289	-0.0520876	0.000876293	-0.0655066	0.0983526
F9WXG1	10.2909	15.2086	13.2764	14.9067	10.417	14.863	13.5817	15.1007	10.6331	13.645	13.5021	14.4821	11.092	14.2671	13.3947	14.9805	10.7779	14.5498	14.0629	14.9938	12.1436	14.7642	14.0487	15.0848	-0.0424262	0.408805	-0.243135	0.107016	-0.352077	-0.104877	-0.195595	0.166225	-0.247081	-0.186672	-0.0556565	-0.338699	0.0710549	-0.263731	-0.117141	0.0810215	-0.0431305	0.20708	0.428383	0.0373261	0.422235	0.091423	0.31416	-0.144509	-0.113262
F9WXG3	14.2113	15.1202	13.732	14.8496	14.4565	15.244	13.9954	14.9651	14.3341	14.1193	13.8291	14.9029	14.7748	14.6072	14.0089	15.0027	14.5953	14.688	13.6924	14.9893	15.3671	14.8474	13.9423	15.3364	0.147155	0.0990245	-0.00982016	-0.0329619	-0.0432974	0.0547002	-0.00413635	-0.0522938	0.0908364	-0.081913	-0.0853684	-0.0858181	0.0230525	-0.144997	0.274711	0.0203735	0.0435135	0.123866	-0.164392	-0.0501154	-0.0850548	-0.0467757	-0.0144493	0.0241612	0.0813789
F9WXG7	14.5419	16.108	15.0093	15.5904	15.0904	16.016	15.104	15.6136	15.1027	14.6575	15.0046	15.5174	15.4938	15.3199	14.8467	15.6288	15.3018	15.2988	15.0522	15.6755	16.3635	15.7381	15.3233	15.9362	-0.214663	0.334786	0.0774882	0.0551334	-0.101964	0.0746915	-0.0855615	-0.0564417	0.0527101	-0.0964217	-0.00930989	-0.299634	0.0495772	-0.184364	-0.0774368	-0.00616658	0.0575346	-0.0173872	0.00544258	-0.0165616	0.218825	0.091908	0.176489	-0.0286736	-0.051451
F9WXG9	12.8644	14.6973	14.5415	13.2626	13.36	14.9682	14.6687	13.3775	13.2398	14.311	14.6546	13.0309	13.5211	14.6238	14.4996	13.3192	13.4882	14.3585	14.1877	13.5146	13.6756	14.6585	14.4803	13.7377	0.0652825	-0.155703	0.161009	0.0139391	0.12517	-0.0529599	0.030434	-0.00598309	-0.147262	0.104804	0.0853248	0.274078	0.0343648	0.0396775	0.126706	-0.0291676	0.201404	-0.0375299	-0.307786	0.109108	-0.511546	-0.0675628	-0.115167	0.0593664	0.179859
F9WXI0	9.6378	13.4348	11.5706	11.3785	10.7847	13.4593	11.7525	11.7468	10.7375	12.6484	11.937	11.6747	10.4401	13.1211	11.6393	11.869	11.2236	12.9727	12.1214	11.7079	11.2389	13.3082	12.0132	12.3998	-0.480232	0.0271844	-0.143474	-0.292491	0.230963	-0.116352	-0.219399	-0.0590756	0.0741813	0.0536518	0.264091	0.0569175	-0.365501	-0.0175325	-0.0671729	0.0982218	0.617868	0.0221615	0.292269	-0.119941	-0.267189	0.0276206	0.0841244	0.299104	-0.258168
F9WXI5	13.2496	14.1043	13.5951	13.7773	14.3723	15.467	13.7348	14.072	14.0782	14.937	14.0084	14.3405	14.2012	15.3338	13.7647	14.2847	14.3299	14.8841	13.317	13.9599	13.6364	14.5922	12.7788	14.136	-0.169227	-1.0323	0.186908	-0.192688	0.517674	0.162384	0.0688085	-0.0327333	0.441039	0.43093	0.303915	0.616529	0.0947367	0.466214	0.364052	0.214945	0.4234	0.204515	-0.206257	-0.16689	-1.1705	-0.417346	-0.844441	-0.263671	0.372163
F9WXI7	11.9031	13.247	12.6416	12.424	12.1759	13.2661	12.6225	12.6552	12.4739	12.8724	12.5952	12.2811	12.5848	12.9485	12.3328	12.6749	12.2637	12.6788	12.5493	12.7911	13.2046	13.0188	12.6683	12.9683	0.0278142	-0.00838958	0.198216	-0.0833755	-0.135097	-0.15741	-0.0786501	0.0130028	-0.155677	-0.0174401	0.243319	0.433063	0.0219496	-0.0379926	-0.102949	0.0678203	-0.0992653	-0.11963	-0.00909603	0.126933	-0.0587205	-0.109641	0.00991967	0.0312971	0.0653524
F9WXJ0	13.5881	15.3971	13.8832	13.3339	14.0727	15.8064	13.9575	13.2473	13.8316	14.7775	13.9012	13.2896	14.2648	15.2665	13.8191	13.1228	13.9115	14.9803	13.4911	13.3174	14.8078	15.5533	14.0363	13.7208	0.0677816	-0.149946	0.160061	0.120332	0.116652	0.0913486	-0.0234642	-0.101027	0.146571	0.00882374	-0.0441198	0.046583	0.056852	-0.0116001	0.103547	-0.190486	-0.0965389	-0.109694	-0.347067	-0.052968	-0.100627	0.133308	0.0980999	0.0775782	-0.00253276
F9WXK7	8.62808	13.0519	11.5371	13.5111	9.04647	12.9574	12.0765	13.5077	8.51657	11.8444	12.1314	13.3056	9.85028	12.1736	11.419	13.5798	8.23812	12.2705	11.9545	13.5347	10.6848	12.8053	12.0854	13.749	0.0264255	0.284576	-0.205334	0.104924	0.00909496	0.0219466	0.0763674	-0.0333796	-0.0300704	0.219735	-0.440465	-0.106905	0.561016	-0.324739	-0.315827	0.073785	-0.851215	-0.039811	0.0970304	-0.0284012	0.695144	0.164932	0.128028	-0.0868579	-0.172663
F9WXK8	12.9745	13.4745	11.3179	13.9275	13.6794	12.9868	11.3903	14.0735	13.7766	11.6489	11.2565	13.6846	14.029	12.4119	11.0845	14.0686	14.0251	12.7637	11.9793	14.2762	14.6137	13.1205	11.7571	14.1134	-0.316122	0.489921	-0.0214973	0.0286373	-0.047011	-0.165843	-0.20686	0.0397706	-0.143717	-0.252124	0.130601	-0.519559	0.0507568	-0.303649	-0.247199	0.0699565	0.246801	0.236131	0.524907	0.220477	-0.0650248	0.262998	0.202774	-0.215124	-0.00117091
F9WXN2	12.3638	13.21	12.3007	13.6245	12.573	13.4302	12.2319	13.5643	12.6753	12.2525	11.9133	13.5452	12.6632	12.917	11.4715	13.6418	12.4818	12.1259	11.2428	13.5607	13.2893	13.0355	12.1593	14.1064	0.24847	0.131297	0.538993	0.0757554	0.0219298	0.183435	0.212462	-0.119267	0.0670149	-0.0176007	0.204562	-0.0100377	-0.139698	0.107249	-0.282582	-0.00666281	-0.121188	-0.49577	-0.633929	-0.144865	-0.214075	0.0838267	0.182656	0.128024	0.203521
F9WXQ1	12.6103	13.5857	11.9376	14.1248	13.2645	13.7624	12.4549	14.1671	13.1575	12.5582	12.3983	14.2621	13.5837	13.2443	12.0402	14.2334	13.5421	13.3961	12.2639	14.1775	14.8243	13.625	12.7014	14.6129	-0.327649	-0.026431	-0.236846	-0.0130193	-0.109244	-0.0177968	0.0226892	-0.105602	0.194733	0.0545194	-0.135885	-0.237827	-0.0419205	-0.0988473	-0.126637	-0.00426431	0.116406	0.240978	-0.0256356	-0.117228	0.498293	0.139924	0.31191	0.0453808	-0.399864
F9WXQ2	11.3129	11.8953	13.5807	12.4553	11.7408	11.8639	13.6046	12.6157	11.6517	11.0428	13.6503	12.7821	12.2199	11.5834	13.6249	12.648	11.875	11.4088	13.7603	12.8215	12.8757	11.7335	13.6749	13.1001	-0.0740487	0.0571738	0.0563663	-0.156708	-0.0818587	-0.142304	-0.177584	-0.131126	0.240615	-0.0433621	-0.0906284	0.0208125	0.145384	0.0142747	0.108166	-0.0638024	0.000410803	0.0276625	0.120928	0.0525879	0.100741	0.0223803	-0.0645138	0.0584335	-0.0585645
F9WXQ5	15.8562	16.965	16.4602	16.8049	16.2672	17.1714	16.6318	16.8493	16.2198	16.3324	16.5474	16.6405	16.4906	16.9714	16.425	16.8487	16.261	16.6009	16.6697	16.8629	17.0352	17.0361	16.6221	17.1869	0.0602982	-0.131357	0.0257261	0.0644599	0.0355567	-0.0930026	-0.0604174	-0.0259589	-0.0294265	-0.0563011	0.0685017	0.0520892	0.00705892	0.144018	-0.00186719	0.00847661	-0.0226538	-0.0384596	0.120201	-0.0343577	-0.148762	0.0667119	-0.027341	0.0168066	0.0279278
F9WXQ7	12.2618	13.6493	12.7294	14.0661	12.8004	13.4404	13.0601	14.1319	12.7578	12.3898	13.0296	13.9454	13.2134	12.9147	13.1141	14.1551	12.9377	12.7747	13.1899	14.1269	13.5023	13.2923	13.2425	14.3649	-0.091335	0.322239	-0.206641	0.0595152	0.0114898	-0.054748	-0.133749	-0.00955651	0.00928421	-0.0756788	0.0492651	-0.121135	0.172603	-0.143372	0.185741	0.0486894	0.0968444	-0.0952854	0.138829	-0.0365672	-0.238868	0.0923017	0.0915001	-0.0713652	0.0525522
F9WXR2	12.5732	14.3547	12.3343	12.8061	13.1521	14.7635	12.5167	12.8958	13.0162	14.01	12.2572	13.0188	13.3908	14.5031	12.0461	12.8738	13.0738	14.1259	12.2558	12.9945	14.1877	14.5457	12.7363	13.471	-0.100032	-0.279262	0.1015	-0.0787782	0.0431779	-0.0385508	0.0260568	-0.12394	0.204413	-0.144884	-0.0124421	0.192099	0.0300018	0.13811	-0.179109	-0.110905	-0.0870999	-0.0510893	-0.0920474	-0.0472656	0.126395	0.0386928	0.288483	0.156477	-0.241655
F9WXR9	14.9345	16.1369	15.3094	14.6402	15.3236	16.4258	15.5324	14.7875	15.2257	15.4514	15.4684	14.6952	15.7685	15.9668	15.1931	14.714	15.5661	15.767	15.2687	14.7758	16.4047	16.0303	15.4845	15.1536	-0.0435936	-0.0763346	0.0582539	-0.0290817	-0.0902496	0.0445566	0.0234552	-0.0165638	0.0964103	0.0479172	-0.107755	0.0542763	0.102746	0.022529	-0.0504265	-0.0550843	0.100293	0.0108161	-0.0975482	-0.0503637	0.0385585	-0.0558435	0.0183484	0.0546832	-0.0366257
F9WXU5	14.9655	15.6042	14.6494	15.3058	15.2705	15.0896	15.1425	15.3991	15.0345	13.8532	14.9506	15.0235	15.471	14.4701	14.8472	15.3957	15.3539	14.4645	15.1482	15.5572	16.0169	15.0353	15.1566	15.5277	0.1725	0.6012	-0.208137	0.0627849	0.0417906	-0.0814427	0.0272661	0.0212419	-0.149062	-0.0762149	-0.113847	-0.333675	-0.00960114	-0.263929	-0.00268084	0.0528136	0.0732245	-0.081488	0.17572	0.157303	-0.164067	0.159335	0.084047	-0.145081	0.173528
F9WXV6	13.8856	14.978	13.862	13.8942	14.0999	15.0417	14.0171	13.9612	14.0368	14.3611	13.8611	13.7827	14.07	14.7895	13.8578	13.9256	14.062	14.4715	13.8676	13.9636	14.595	14.9394	13.9794	14.4089	0.319794	-0.0356635	0.0793832	0.029985	0.0983967	-0.140126	-0.0232809	-0.0379242	-0.0110669	-0.090755	0.115591	0.163507	-0.183464	0.0447407	0.0828301	-0.0384084	0.00856138	-0.0851486	-0.0300217	-0.0575038	-0.358879	0.05269	-0.0181557	0.114918	0.150731
F9WXW9	10.5701	13.1056	12.301	13.2862	10.9313	13.1758	12.7737	13.4511	10.9318	11.9777	12.6368	13.0631	11.4057	12.6041	12.2032	13.5832	11.2394	12.5657	12.2544	13.2098	12.2789	12.8573	12.618	13.424	-0.096979	0.141015	-0.0386542	0.0750285	-0.171584	0.0431673	0.176327	0.105118	-0.077528	0.127927	-0.0907249	-0.170716	0.0509974	-0.091453	-0.128789	0.272284	0.0845629	0.0582005	-0.200211	-0.158134	0.223728	0.0197868	0.0634004	-0.216768	-0.00243428
F9WXY4	13.0058	14.4709	13.3607	13.5953	13.4783	14.7527	13.7777	14.02	13.5542	14.0938	13.8359	13.9135	13.7988	14.607	13.7752	14.1904	13.7935	14.611	13.985	14.2502	13.9824	14.6633	13.8219	14.3979	-0.037316	-0.31236	-0.273774	-0.340847	-0.000536039	-0.198661	-0.114593	-0.0509188	0.0479447	0.0321029	0.155771	0.126646	0.0680855	0.0926708	0.148335	0.154469	0.262744	0.2847	0.235544	0.157261	-0.448749	0.00700456	-0.0276154	0.0320918	-0.131758
F9WXY6	12.4594	13.5058	12.9668	13.0512	12.677	14.0914	12.8914	13.1206	12.4328	13.1176	12.9237	12.84	12.9241	13.6996	12.6062	13.0162	12.6981	13.3574	12.6924	13.1822	13.5145	13.684	12.8802	13.3899	0.234109	-0.320313	0.264932	0.0762921	0.016073	0.097146	-0.0682495	0.010871	-0.0643797	0.0525718	-0.147819	0.107608	0.0112339	0.142409	-0.088035	-0.0584913	-0.0147823	-0.011704	-0.124493	0.050402	-0.0988151	-0.0151455	-0.0367266	-0.0146942	0.1051
F9WXZ6	15.7866	16.3302	16.3616	16.4445	16.1562	16.6867	16.3479	16.4725	16.0947	15.7755	16.2842	16.4548	16.492	16.3667	16.1918	16.5008	16.2182	15.9861	16.0002	16.6843	17.4305	16.4269	16.3872	16.9734	-0.0173809	-0.182006	0.224342	-0.0187562	-0.083469	0.00649533	-0.0470835	-0.125593	0.062	-0.0223506	-0.0646327	0.0793759	0.000421822	0.123506	0.0622099	-0.062252	-0.0734231	-0.0690543	-0.25203	0.0641375	0.238484	0.0416829	0.0349126	0.0804641	-0.0973361
F9WXZ7	13.7999	11.4064	10.5776	12.868	14.2072	11.8618	10.1186	12.8142	14.2953	10.7383	9.70636	12.8992	14.5513	11.4245	8.69818	12.6967	14.336	11.3379	7.50764	12.5852	16.0761	11.8572	9.74863	13.2089	-0.185362	-0.281419	1.30969	0.147768	-0.213727	0.0059047	0.592855	-0.0408599	0.249467	0.269169	-0.0452885	-0.133486	-0.121572	0.00560559	-0.562119	-0.123392	-0.136909	0.10707	-1.8753	-0.291948	0.702859	0.296325	0.265701	0.058964	-0.0832918
F9WY06	16.9744	17.8366	17.1478	18.0867	17.483	18.213	17.4159	18.1307	17.3119	17.0353	17.3215	17.9687	17.6809	17.4269	17.201	17.9908	17.3678	17.2108	17.2103	18.0141	18.6981	17.5247	17.273	18.3243	-0.0525022	0.045208	0.0110965	0.125929	0.0203219	0.253545	0.0214647	0.0350845	0.0784499	0.015537	-0.0704609	0.0600314	-0.0336256	-0.0954742	0.0719679	-0.0697469	-0.146844	-0.1236	-0.0414075	-0.103573	0.283111	-0.139711	-0.0786586	-0.0661433	0.0327832
F9WY18	11.6136	13.6259	10.1079	13.1203	11.9851	14.2507	10.8224	13.6888	12.1686	13.3852	10.0262	13.4517	12.486	14.1849	10.2627	13.7976	12.1795	13.7821	10.9149	13.5499	12.813	13.6604	10.3864	13.8477	-0.0349614	-0.439089	-0.187309	-0.33058	-0.099227	0.0175602	0.269457	0.10306	0.0713341	-0.438199	0.164666	0.13625	0.149854	0.38881	-0.0248784	0.246871	0.0432918	0.174057	0.504714	-0.0578513	-0.223624	-0.277588	-0.123784	-0.0328339	-0.0835274
F9WY19	13.0961	14.2533	12.5246	13.7661	13.446	14.5762	12.4507	13.8519	13.3136	13.5483	12.4777	13.7972	13.7668	14.0997	12.3198	13.945	13.5068	13.7709	12.3907	13.9359	14.6824	14.2066	12.5329	14.1836	0.019828	-0.0726588	0.200135	-0.0220643	-0.0658972	0.0821184	-0.131585	-0.0710745	0.079481	-0.0160381	-0.118012	0.0384399	0.00300182	0.0426481	0.00289625	0.0570156	-0.0571016	-0.0981123	-0.0488145	-0.009136	0.218181	0.00756469	-0.00659399	-0.0342218	-0.0149227
F9WY22	9.92883	10.3301	10.6095	11.0566	10.4025	10.3199	10.7785	10.9811	10.5273	9.61662	10.4835	10.8701	10.9963	9.8099	10.2667	11.2563	10.1878	9.16907	10.2803	11.1193	11.7874	10.0467	10.6153	11.8143	-0.150458	0.197914	0.228823	-0.00117834	-0.112527	0.0195979	0.139989	-0.211587	-0.117254	-0.0664768	0.0926184	0.300493	0.229436	-0.0533607	-0.106436	0.0986602	-0.379117	-0.506138	-0.215432	-0.0954087	0.320048	0.041494	0.0195321	0.326768	-0.108185
F9WY53	NaN	13.2948	12.2753	11.3163	NaN	13.4398	12.7689	11.2925	NaN	12.3295	12.6066	11.0432	NaN	12.9102	12.4159	11.2651	NaN	13.0274	12.6854	11.4418	NaN	13.0808	12.7308	11.3323	NaN	0.03085	-0.180298	0.15959	NaN	0.00783461	0.0555544	0.000905778	-0.0430787	-0.0182768	NaN	-0.118309	NaN	-0.0847229	-0.032085	0.008606	NaN	0.220514	0.114857	0.128144	NaN	-0.0561667	0.0602476	-0.254167	0.0867426
F9WY65	12.0483	NaN	11.3219	11.6537	12.2061	NaN	11.9443	11.7647	12.0327	NaN	11.9946	11.5412	12.6199	NaN	11.761	11.311	12.3414	NaN	11.901	12.0592	13.1055	NaN	11.7485	12.3868	0.21504	NaN	-0.331719	-0.00730522	-0.0628319	NaN	0.0328519	-0.0311347	-0.0492536	0.171689	-0.155884	NaN	0.0990704	NaN	0.114943	-0.449782	0.0204332	NaN	0.132358	0.241349	-0.115828	NaN	-0.120123	0.296126	-0.061386
F9WY66	14.7491	15.9651	14.6514	14.164	15.0162	16.3734	14.6898	14.2771	14.9316	15.5689	14.7128	14.1175	15.3208	15.9743	14.5695	14.2334	14.978	15.6937	14.3603	14.3155	15.7344	16.0045	14.6406	14.6291	0.186521	-0.215032	0.172237	-0.000274569	0.0178648	0.0251306	-0.0471463	-0.022087	0.0236702	0.0643786	0.0136231	0.204862	0.0705409	0.0631006	0.097969	-0.0307137	-0.0723415	-0.0294238	-0.233866	-0.0056721	-0.216208	-0.0486372	-0.053572	0.0350771	0.106698
F9WY68	13.8776	14.7303	14.957	15.5322	14.4773	14.841	15.3574	15.6084	14.5026	13.4419	15.1568	15.4034	14.616	14.2329	15.0463	15.5342	14.5378	13.9817	15.2042	15.606	15.7236	14.5895	15.3228	15.9545	-0.185842	0.177229	-0.0921712	0.0508897	-0.0218174	0.119864	0.0504574	-0.00781271	-0.00742655	-0.0616143	0.0837927	-0.295033	-0.135049	-0.0511976	0.00475195	-0.046894	-0.013267	-0.114366	0.0399553	-0.0322027	0.272183	0.163503	0.058621	0.0434462	-0.146912
F9WY70	10.8462	11.1867	9.38178	NaN	11.8613	10.8853	9.44296	NaN	11.2105	10.725	8.46082	NaN	11.8133	10.621	9.29822	NaN	11.6448	10.6628	8.18527	NaN	12.697	10.8191	9.67624	NaN	-0.273595	0.119879	0.43247	NaN	0.305811	-0.349559	0.235879	NaN	NaN	-0.657752	-0.264678	0.474322	0.00594105	-0.176879	0.356532	NaN	0.0373808	0.0529711	-0.879052	NaN	0.18914	-0.120734	0.511923	NaN	-0.100525
F9WY76	13.5799	13.9468	13.5258	14.4459	13.5731	13.8681	13.7014	14.661	13.5298	12.8189	13.6973	14.4274	13.9172	13.4353	13.6431	14.5778	13.5694	13.18	13.6799	14.6684	14.8	13.4942	13.9176	14.799	0.310748	0.239429	-0.0434982	-0.0256088	-0.131821	-0.00732023	-0.125623	0.0546954	0.0264856	-0.0412359	-0.0947373	-0.0724144	-0.039581	-0.00314469	0.0814239	0.00652746	-0.187454	-0.070392	-0.0043569	0.0400644	0.142846	-0.0861578	0.13329	-0.102164	0.098314
F9WY96	13.132	15.4688	14.2691	15.1111	13.7785	15.5448	14.6754	15.3241	13.788	14.6017	14.6519	15.1042	14.0199	15.1697	14.5946	15.2704	13.7894	15.0735	14.6286	15.4303	14.4821	15.3669	14.7407	15.5365	-0.140551	0.0144452	-0.199355	-0.0598695	0.070185	-0.0776677	-0.0508508	0.0183013	0.00368996	0.0141452	0.160044	-0.0366256	0.0596582	-0.0157577	0.133754	-0.000355203	0.0291701	0.0761089	0.0450638	0.102426	-0.178506	0.0394967	0.0572426	-0.0641926	-0.0598426
F9WY98	13.5978	13.3807	11.6359	NaN	13.9128	13.3846	12.0046	NaN	13.7958	12.5361	11.3777	NaN	14.372	13.1948	11.6743	NaN	14.1321	12.806	11.3673	NaN	15.0471	13.326	11.5522	NaN	0.0139538	0.0258502	0.158807	NaN	-0.106788	-0.138314	0.269705	NaN	NaN	-0.268659	-0.143405	-0.00271481	0.100506	0.108883	0.204808	NaN	0.0605555	-0.0918283	-0.2248	NaN	0.0751785	0.0981238	-0.139861	NaN	0.0550565
F9WYA5	14.5495	14.822	13.8587	14.1191	15.005	15.1419	14.3128	14.5012	14.9036	14.2515	14.1474	14.293	15.4565	14.7055	14.0709	14.5163	15.3243	14.6348	14.1545	14.6662	15.7578	14.8377	14.1211	14.555	-0.0575007	-0.1604	-0.127323	-0.197592	-0.0377972	-0.00854665	0.0690532	0.0496802	0.046779	-0.00788607	-0.0588216	0.0851984	0.161796	-0.00794167	0.0925121	0.0998284	0.229599	0.109388	0.0535043	0.19267	-0.237275	-0.0176983	-0.07986	-0.191365	-0.00415448
F9WYB6	13.0085	NaN	13.1016	9.64164	13.5616	NaN	13.2992	9.78581	13.3798	NaN	13.2335	9.61916	13.6312	NaN	13.0172	9.78766	13.6138	NaN	13.5161	9.90063	13.8003	NaN	13.3422	10.115	0.0683557	NaN	-0.0251452	-0.041575	0.185801	NaN	-0.0852773	-0.0322385	0.00645006	-0.0625214	0.0842829	NaN	0.00344242	NaN	-0.1019	0.00465461	0.185987	NaN	0.274345	0.0605552	-0.527869	NaN	0.000498161	0.00215372	0.175618
F9WYC1	8.6774	9.83693	8.98465	11.8746	9.68773	9.46826	10.4738	12.4432	8.5194	9.02095	10.0616	11.58	8.7067	9.27836	9.28425	11.9454	9.87211	9.6624	11.1237	12.1271	10.1891	10.2018	10.3516	12.7353	-0.0389313	0.00866228	-0.937049	-0.117917	0.535673	-0.528096	0.294338	0.315861	-0.341947	-0.0293201	-0.552309	0.00876951	-0.69724	-0.280954	-0.62983	-0.14686	0.668095	0.291136	1.08696	-0.0222427	0.0847124	0.500482	0.214901	0.313106	-0.549609
F9WYC9	6.99299	8.5519	9.16734	12.2469	6.8913	7.85019	8.51609	12.0993	8.04587	7.90436	8.32468	11.7311	8.22766	7.41049	7.55436	12.3973	5.83958	7.13319	7.29838	12.2198	8.61967	8.01915	9.19746	12.594	0.115885	0.490191	0.949197	0.157261	-0.421531	-0.379604	0.0401733	-0.125152	-0.287972	-0.0627364	0.813383	0.658743	0.662945	-0.382255	-0.656168	0.207908	-1.52521	-0.471509	-1.03478	-0.026713	0.354523	0.0844339	0.764311	0.0746689	0.108649
F9WYD0	14.2762	16.0108	14.8361	16.3566	14.7334	15.9443	15.1143	16.4809	14.6454	14.5113	14.9283	16.1471	15.1415	15.1908	14.5944	16.3693	15.0291	15.1191	14.9525	16.3501	15.9822	15.6522	15.097	16.706	-0.132711	0.35587	0.0405237	0.0800544	-0.111188	0.121297	0.0609704	0.0694905	-0.058979	-0.0364586	-0.118851	-0.327552	0.0449516	-0.195111	-0.193523	-0.00702059	0.132529	-0.0788302	0.0419739	-0.0833346	0.185269	0.124327	0.0865137	-0.000210762	-0.0130403
F9WYD5	13.6913	15.3284	13.8202	15.0227	14.3233	15.1673	14.0069	15.1524	14.1399	13.8598	13.7159	14.8987	14.6326	14.4955	13.5639	15.1411	14.6072	14.7743	13.8719	15.147	14.9882	14.9975	13.9088	15.3542	-0.146689	0.307761	0.130492	0.0284541	0.0495511	-0.021454	0.0594788	0.0233434	-0.0250586	-0.143098	-0.0535017	-0.344718	0.106993	-0.25613	-0.118155	0.0470577	0.281484	0.210645	0.0672052	-0.00407262	-0.237837	0.103896	0.00407619	-0.0697239	0.129902
F9WYE0	12.3558	14.8507	14.168	14.9829	12.7186	14.8445	14.4039	15.0125	12.7444	13.6587	14.3161	14.8155	13.1053	14.2829	14.3792	14.9731	12.869	14.037	14.3294	15.0035	14.0839	14.4495	14.4234	15.0984	-0.0646619	0.246629	-0.0437134	0.127081	-0.137505	0.0723326	-0.0655889	0.0217426	0.0301206	-0.0649544	-0.0313892	-0.129299	-0.00274883	-0.0521416	0.175037	0.0174094	-0.0391268	-0.110008	0.00260428	-0.00920864	0.275432	-0.0275135	-0.0033844	-0.187145	0.0519864
F9WYF1	13.6984	13.271	13.6078	13.7599	13.5059	13.0773	13.3914	13.9705	13.4202	12.8637	13.459	13.8326	13.5331	13.0265	13.6035	14.0063	13.5482	13.511	13.4003	14.1659	13.6721	13.4621	13.3836	14.3535	0.69446	-0.181111	0.258425	-0.129783	0.0662968	-0.542858	-0.215765	-0.0540454	0.013427	-0.0595859	0.060927	0.227699	-0.158442	-0.156678	0.261763	0.0168624	0.0566226	0.515925	-0.0640353	0.119398	-0.719864	0.137024	-0.180803	0.0341417	0.342873
F9WYF4	12.9715	13.572	13.0098	11.7492	13.197	13.6647	13.1457	11.7084	13.334	12.4135	12.9483	10.8405	13.7087	12.9915	12.8985	11.5138	13.3501	12.76	13.0166	11.4885	14.5787	13.3385	13.4103	11.925	0.00728017	0.19847	0.0631639	0.336721	-0.203011	0.123068	-0.0586624	0.161076	-0.501466	-0.167619	0.0143544	-0.143935	0.0567802	-0.113019	-0.0405403	0.00154944	-0.10183	-0.156521	-0.045026	-0.0808013	0.226427	0.0919358	0.248684	0.0829214	-0.0110831
F9WYG2	17.2788	18.0628	17.527	18.0092	17.7465	18.3353	17.6277	18.2035	17.6589	17.251	17.5558	18.0033	18.0014	17.7347	17.441	18.0958	17.7711	17.5201	17.4983	18.2092	18.8789	17.9054	17.5504	18.4855	-0.0513384	0.0111059	0.118579	-0.0334326	-0.0194174	0.115548	-0.0385252	0.0260052	0.031155	-0.0219482	-0.0266412	0.0153816	-0.0164439	-0.0480505	0.0401952	-0.0466302	-0.046788	-0.0746369	-0.0252122	0.00971004	0.160629	-0.0193483	-0.0730891	0.0131925	-0.0091174
F9WYG9	12.7378	14.6512	12.5094	14.3704	12.7778	14.7514	12.9363	14.3139	12.7494	13.3725	12.7466	13.9901	13.1444	13.982	12.4437	14.3969	13.1677	14.1625	12.8825	14.468	13.4635	14.4486	12.694	14.5606	0.290077	0.17296	-0.0678201	0.145554	-0.105649	0.105153	0.101339	-0.0458247	-0.164251	0.000199981	-0.0536667	-0.289659	0.00907895	-0.227231	-0.125886	0.0722204	0.232371	0.141351	0.190359	0.0862689	-0.372211	0.0974253	-0.0981917	-0.0939673	0.251929
F9WYH0	14.7791	16.3084	15.8278	16.3088	15.3402	16.1968	16.3803	16.4539	15.406	15.0201	16.2476	16.1738	15.7526	15.6695	16.2168	16.4128	15.6282	15.6314	16.4993	16.5115	16.5403	16.0419	16.265	16.644	-0.236255	0.24689	-0.286765	0.0164774	-0.11088	-0.0328269	0.00799629	0.0266845	-0.0480798	-0.0362272	0.0353046	-0.2253	0.0496742	-0.123019	0.109868	0.0206194	0.125211	0.0269098	0.269732	0.0623208	0.136945	0.107347	-0.0646039	-0.0780223	-0.0903297
F9WYH3	9.67835	12.5938	12.3081	NaN	10.6894	13.0135	12.4561	NaN	10.4158	11.8694	12.34	NaN	11.4164	12.4269	12.1377	NaN	11.2156	12.4591	12.1701	NaN	11.9583	12.3772	12.5645	NaN	-0.658213	-0.112991	0.103615	NaN	-0.0828992	0.138624	-0.00620201	NaN	NaN	-0.0337457	-0.276095	-0.0213739	0.392199	-0.0109192	-0.0592412	NaN	0.39135	0.209305	-0.149426	NaN	0.233659	-0.202645	0.145	NaN	-0.281201
F9WYH5	14.8539	16.3321	15.231	15.634	15.2193	16.4999	15.5125	15.8539	15.0361	15.7279	15.3665	15.6434	15.638	16.542	15.5346	16.0115	15.4726	16.0457	15.6595	16.0829	16.2444	16.2247	15.5238	16.0765	0.00229704	-0.146804	-0.115443	-0.124556	-0.0680826	-0.147062	-0.0916519	-0.0395221	-0.0447187	-0.149209	-0.170934	0.0651243	0.0987283	0.33206	0.195856	0.153118	0.133272	0.0238443	0.198079	0.167437	0.00471914	-0.127162	-0.0376309	-0.111757	-0.0281689
F9WYH7	13.632	14.2111	13.3829	13.4507	14.7493	15.0624	14.6029	14.1074	14.7543	15.0065	15.0397	14.2699	15.3207	15.8344	14.7103	14.7673	15.3747	15.5802	14.4768	14.4733	13.0364	12.7807	12.7132	12.7397	-0.286844	-0.784984	-0.646491	-0.392223	0.394758	-0.101734	0.315713	0.129623	0.497517	0.841039	0.480068	0.826555	0.714234	1.10735	0.688503	0.824543	0.96824	1.04117	0.332411	0.473485	-2.27046	-2.08835	-1.53118	-1.53294	1.3281
F9WYH9	11.1144	12.0069	7.52278	12.2675	12.5265	12.3951	9.44537	12.8165	12.4702	12.1817	9.63399	13.1118	12.9591	13.0854	9.24491	13.3081	13.1987	12.373	9.78748	13.0318	12.5346	11.1675	9.46854	12.7157	-0.793778	-0.444847	-1.53616	-0.482581	0.182608	-0.224799	0.128654	-0.068464	0.432198	0.40579	0.206654	0.546031	0.363279	0.902632	0.193592	0.458135	0.802827	0.378211	0.613526	0.124836	-0.761589	-1.15723	0.194599	-0.464124	-0.267257
F9WYI1;REV__F9XD71	14.9632	16.9057	15.8375	16.2051	15.6391	16.3088	16.2802	16.2866	15.3755	14.7253	15.89	15.8874	15.8339	15.3904	15.6323	16.0762	15.8201	15.591	16.03	16.0962	16.4736	16.036	16.1986	16.2304	-0.162004	0.829356	-0.01568	0.199912	0.0782534	0.0643597	0.169208	0.146541	-0.0473257	-0.132448	-0.105032	-0.535011	0.0210986	-0.417029	-0.213304	-0.0287764	0.207282	-0.028357	0.06182	-0.0658734	-0.0395978	0.0866821	0.130404	-0.204477	0.219643
F9WYI5	7.18923	7.26959	NaN	8.82024	8.20872	8.71579	NaN	9.22567	7.13904	7.88417	NaN	9.38444	8.0077	7.53387	NaN	9.13157	6.74201	7.48285	NaN	9.46078	8.58676	7.73775	NaN	9.82179	0.102724	-0.75124	NaN	-0.362063	0.686496	0.526875	NaN	-0.0914794	0.272639	NaN	-0.302844	0.679425	0.233583	-0.217998	NaN	-0.150523	-0.832178	-0.0809795	NaN	0.121619	0.11222	-0.156082	NaN	0.209806	-0.392174
F9WYI8	16.1542	16.9441	15.9537	16.8598	16.6213	16.8505	16.1716	16.9789	16.4307	15.895	16.0484	16.7248	16.6781	16.3444	15.8355	16.9313	16.5519	16.2276	16.0517	17.0355	17.4063	16.6729	16.1286	17.2779	0.072865	0.204847	0.0470277	0.0168308	0.1042	-0.0568247	0.00714402	0.00115151	-0.047608	-0.0274893	-0.00603735	-0.0281269	-0.0908642	-0.125851	-0.063541	-0.0113757	-0.017088	-0.0546612	0.0299728	0.0357501	-0.0630758	0.0606173	0.00688571	0.00525126	0.082973
F9WYM3	13.0487	13.0738	12.8034	13.4046	13.6933	13.371	13.4006	13.5634	13.6583	12.641	13.5709	13.4972	14.0095	13.2915	13.3194	13.6872	13.971	12.9499	13.2133	13.5419	14.1354	13.399	13.2135	13.6203	-0.144918	-0.297415	-0.325201	-0.0227314	0.0639244	-0.16831	0.014233	0.00125451	0.140393	0.273052	0.109321	0.085937	0.128244	0.189231	0.198405	0.160024	0.289702	0.0357363	-0.0303477	-0.0422557	-0.446274	0.15482	-0.130142	-0.236684	-0.032996
F9WYM7	14.031	15.574	14.4444	14.8118	14.1906	15.7832	14.5223	14.8748	14.2837	14.9221	14.4654	14.7781	14.556	15.2362	14.2792	14.9224	14.2041	15.0393	14.1	15.0192	15.2788	15.4121	14.5543	15.3706	0.166053	-0.00395037	0.174995	-0.0258871	-0.110081	0.0371393	-0.0048106	-0.097715	0.0109218	0.0268011	0.0633329	0.16018	0.00339982	-0.07282	0.0174228	-0.0151523	-0.148522	-0.0816709	-0.28438	0.0246722	0.0258171	-0.0388783	0.0699719	0.10316	0.037785
F9WYN2	13.0464	13.97	12.732	11.7451	13.3297	14.2956	12.9403	11.921	13.3292	13.5606	12.7767	11.4747	13.3447	13.9497	12.6134	11.8357	13.3372	13.798	12.229	11.9401	13.7715	14.087	12.6856	12.198	0.245679	-0.223628	0.194069	0.0178057	0.093226	-0.0661713	0.144592	0.0588614	-0.182147	0.0695469	0.173148	0.183017	-0.143609	0.0250528	0.0830434	0.008582	0.0488152	0.0613278	-0.423943	0.0559129	-0.417259	0.0204021	-0.0673084	0.0409846	0.164277
F9WYN5;F9XLV7	NaN	11.9453	10.3696	10.6775	NaN	12.1256	11.0784	11.2322	NaN	10.673	11.1295	10.8147	NaN	11.3317	10.4885	10.3172	NaN	11.3772	11.177	10.9326	NaN	11.6301	10.7077	10.6036	NaN	0.181334	-0.330606	0.0396157	NaN	0.193526	0.120373	0.459503	0.24733	0.260008	NaN	-0.274867	NaN	-0.163339	-0.204039	-0.420444	NaN	0.0702171	0.361767	0.137886	NaN	-0.00687187	-0.207503	-0.463891	0.189537
F9WYP0	13.8983	14.3782	13.0915	14.9535	14.4305	14.2107	13.6237	15.2146	14.3029	13.4301	13.5681	14.8712	14.4991	13.9566	13.2301	15.1257	14.424	14.0338	13.6154	15.0496	14.8435	14.2182	13.5436	15.4917	0.057682	0.0900822	-0.228972	-0.0390953	0.154097	-0.245488	0.0453881	0.087174	-0.05092	0.0783197	0.10684	-0.0419278	-0.0291467	-0.0624675	-0.0827739	0.0332955	0.0957217	0.202696	0.179896	-0.0998317	-0.385194	0.0571046	0.00814154	0.0693774	0.032567
F9WYQ5	9.73669	NaN	9.37419	11.9182	9.49436	NaN	10.1189	12.4032	9.27454	NaN	9.73534	11.9354	8.05734	NaN	9.13656	12.2442	9.48937	NaN	9.41485	12.5187	10.6842	NaN	9.30957	12.7495	0.839673	NaN	-0.0158092	-0.251535	0.16162	NaN	0.471165	0.0985945	-0.163873	0.176069	0.0221483	NaN	-1.52728	NaN	-0.245826	-0.025341	0.104673	NaN	-0.0901609	0.192104	0.399169	NaN	-0.295439	0.15005	0.106183
F9WYQ6	12.6796	11.9439	NaN	10.5216	12.9543	12.292	NaN	11.1064	13.1057	11.442	NaN	11.1828	13.4925	12.3507	NaN	11.5353	13.3035	12.2452	NaN	11.6367	13.9756	12.181	NaN	10.803	-0.013197	-0.382074	NaN	-0.484262	-0.174237	-0.20205	NaN	-0.0343355	0.247472	NaN	0.0575646	-0.0678965	0.112083	0.29368	NaN	0.42967	0.123031	0.376259	NaN	0.473994	-0.105245	-0.0179183	NaN	-0.632539	-0.041277
F9WYR9	14.2386	14.453	14.3839	14.7645	14.6588	15.0069	14.2484	14.8577	14.5894	14.1857	14.2454	14.6874	14.8285	14.6997	14.0643	14.891	14.3332	13.9949	13.5646	14.9434	15.9809	14.5399	14.21	15.2476	0.0260701	-0.277181	0.389364	-0.00897112	0.0106221	0.108664	-0.00387011	-0.0505809	-0.0155983	0.0815966	0.0214981	0.271622	-0.0716095	0.238448	0.0773995	0.0177053	-0.366936	-0.278304	-0.54493	0.0130466	0.380355	-0.0632501	0.000439666	0.0443983	-0.0581651
F9WYT8	13.5088	13.8601	12.5942	13.9505	13.9167	14.434	13.116	14.1717	13.8836	13.1073	13.1709	14.1344	14.5074	13.574	12.827	14.3105	14.1235	13.6744	13.096	14.1257	15.2906	13.9684	13.3053	14.8003	-0.13725	-0.159754	-0.299169	-0.173272	-0.165035	0.246089	-0.0350691	-0.0868521	0.0811948	0.108268	-0.117814	-0.0964993	0.173779	-0.176908	-0.0587246	0.0869419	-0.0102378	0.111548	0.08768	-0.15494	0.256559	0.0755235	0.197014	0.246928	-0.386368
F9WYU4	12.3166	14.4077	13.5522	14.1908	12.7982	14.628	14.1908	14.8814	12.4715	14.3671	14.3729	14.6195	13.2706	14.97	14.4041	15.1383	13.3011	15.0112	14.618	15.204	13.1013	14.7332	14.2294	15.2002	-0.0008744	-0.528696	-0.550821	-0.556512	0.0449817	-0.476397	-0.169957	-0.000701321	-0.0572247	0.100658	-0.201322	0.246799	0.26551	0.302614	0.308754	0.291257	0.495923	0.531871	0.399961	0.299914	-0.604219	-0.076191	-0.0885949	0.0232673	-0.222792
F9WYU7	9.01494	9.88961	8.55574	10.6406	8.73711	10.7436	8.48099	10.7062	9.73606	9.85823	8.02608	10.6231	10.1421	10.3028	8.47768	10.3963	8.60244	9.3574	7.70619	10.7826	11.2072	10.3259	9.34576	11.1698	0.000700891	-0.440124	0.248573	0.0459394	-0.712847	0.245757	-0.0839484	-0.0232697	0.0989884	-0.450351	0.366447	0.344585	0.440257	0.24198	0.178131	-0.298176	-0.899479	-0.515329	-0.715994	0.0310633	0.80492	0.123131	0.823589	0.145454	-0.510501
F9WYV2	13.416	13.833	11.6756	11.3356	13.9271	13.6819	12.0901	11.1093	13.9629	12.3923	11.7958	10.8142	14.1735	13.2881	11.6824	11.0797	14.1645	13.1307	12.0921	11.0821	14.9339	13.562	11.9462	11.4359	-0.121248	0.268152	-0.0798261	0.317923	-0.0458432	-0.0510209	0.0768301	-0.043221	-0.133002	-0.128904	0.070266	-0.356484	-0.0513422	-0.00773043	-0.0654739	-0.0377963	0.139583	0.0229179	0.221641	-0.0924657	0.00858408	0.124165	-0.0242678	-0.011438	0.0719895
F9WYV4	11.4811	11.756	9.74838	12.1716	11.691	11.9684	9.92604	12.4062	11.4601	10.9781	10.0688	12.0656	11.7025	11.5086	9.71469	12.1314	11.7592	11.136	10.1452	12.3363	12.5645	11.4245	9.79312	12.5497	0.263821	0.0439281	-0.0260784	0.0199417	0.0379597	0.0882115	-0.106187	0.119693	-0.0155827	0.125056	-0.112602	0.0820697	-0.202457	0.0655116	-0.0521439	-0.12009	0.0541806	-0.119114	0.255699	0.027724	-0.0409015	-0.160607	-0.196345	-0.0316865	0.182788
F9WYW5	13.541	11.2292	13.8264	10.5984	13.7242	12.2561	13.5668	10.7526	13.2437	9.31073	13.1552	10.6091	13.172	11.6538	13.3408	10.8082	13.4771	11.1893	14.0641	10.8625	13.1259	10.342	13.8321	11.2427	0.719401	-0.0178235	0.320463	-0.0887253	0.466901	0.841036	-0.196994	-0.0693581	-0.00755815	-0.520102	0.0667142	-1.12019	-0.337194	0.675744	-0.157543	0.0212984	0.167875	0.399273	0.443068	0.0184737	-1.0837	-0.778042	0.111107	0.125869	0.639519
F9WYW8	NaN	12.809	9.10962	11.5852	7.81654	13.1682	9.25181	11.9015	8.08119	11.9398	9.44265	11.3163	8.14379	12.3363	8.38258	11.3884	6.04839	12.3472	9.1844	11.6423	7.98459	12.6558	9.42171	12.1465	NaN	0.0161211	0.102398	0.0468942	NaN	0.207284	-0.0131845	0.22845	-0.151469	0.266164	NaN	-0.036958	NaN	-0.187639	-0.617023	-0.249653	NaN	0.0113014	0.062167	-0.0527922	NaN	-0.0101093	0.199478	0.178571	-0.0675088
F9WYX3	14.7149	15.3513	13.6957	15.2322	14.9625	15.4822	13.7011	15.2882	15.2274	14.4918	13.8552	15.1465	15.4803	14.9536	13.4046	15.097	15.2394	14.7277	13.6954	15.3744	16.6313	15.1131	13.9225	15.5766	-0.101952	0.0811972	0.10816	0.0715381	-0.290079	0.0440407	-0.144188	-0.00731744	0.0562993	0.0983914	0.0550814	0.037793	-0.0242189	-0.047566	-0.175274	-0.163525	-0.0651602	-0.0854258	-0.00707122	0.056806	0.426329	-0.030039	0.119982	-0.0138006	-0.0858825
F9WYX5	14.2001	16.1524	14.9146	15.0402	14.6507	16.352	15.0346	15.2107	14.592	15.3256	15.0141	15.049	14.9231	15.6744	14.7561	15.1126	14.7071	15.5978	14.8401	15.3178	15.6599	15.9333	15.0056	15.6117	-0.0296868	0.0629758	0.111952	-0.0583928	-0.0148022	0.0945535	-0.0257673	-0.0226452	0.0209071	0.0422224	0.00687031	0.0522321	0.00578941	-0.146062	-0.0389124	-0.0857429	-0.0103306	-0.0346107	-0.0774948	0.0623894	0.0421599	-0.0290887	-0.0119999	0.0834844	0.000573123
F9WYY8	15.5879	15.865	16.0181	15.5796	15.954	16.2724	15.9739	15.6557	15.8491	15.5098	15.8746	15.3756	15.9528	15.8428	15.663	15.5213	15.6234	15.3134	15.7274	15.6695	17.1768	15.8739	15.9312	15.9557	0.122962	-0.164728	0.278288	0.0784544	0.053386	0.0745929	-0.0236797	0.0197329	-0.0550381	-0.0344025	0.0287786	0.296189	-0.19971	0.0820167	-0.0691877	-0.0795939	-0.329243	-0.25928	-0.127407	0.0115087	0.323826	-0.0287903	-0.0236109	0.0249361	0.00465365
F9WZ06	NaN	14.4728	13.1336	14.1384	NaN	13.8252	13.6765	14.8611	NaN	12.8891	13.3725	14.042	NaN	13.5494	13.324	14.1932	NaN	14.2403	14.0381	14.3948	NaN	14.2696	13.6611	14.5633	NaN	0.34826	-0.27577	-0.101933	NaN	-0.467482	0.00932302	0.485883	-0.127857	-0.206219	NaN	-0.419402	NaN	-0.306173	-0.0777509	-0.146939	NaN	0.572793	0.513723	-0.00242579	NaN	0.272004	0.0366946	-0.106728	-0.0771384
F9WZ11	9.91877	10.2409	9.12846	NaN	10.6684	10.0334	9.21201	7.22997	10.1882	8.74349	9.85941	7.2817	10.5551	9.49837	9.54139	7.52974	10.0095	9.67575	10.2306	7.51491	11.1829	9.85223	9.9452	8.17941	0.0573531	0.31672	-0.399483	NaN	0.371302	-0.0588487	-0.573706	NaN	NaN	0.162204	-0.0285787	-0.364613	0.00603832	-0.156859	0.0210671	NaN	-0.339548	0.208561	0.587667	NaN	-0.0665666	0.0550399	0.20225	NaN	-0.0720441
F9WZ12	14.2123	15.0557	13.203	13.492	14.5727	15.2585	13.3865	13.9799	14.3721	14.3552	13.4573	13.6924	14.8876	14.9113	13.2113	13.9812	14.9332	14.8247	13.3773	14.0878	14.9979	15.0103	13.2711	13.9032	0.108768	-0.097056	0.0101766	-0.238991	0.0334055	-0.0623884	-0.0641032	0.114064	0.031934	0.0951216	-0.0868353	0.0185402	0.0963689	0.0274977	0.0260804	0.15045	0.341976	0.128905	0.0694672	0.199967	-0.493683	-0.0154983	-0.136743	-0.257424	0.171562
F9WZ35	14.4031	15.6559	14.9532	15.9563	14.9071	16.2747	15.3692	16.3628	14.9708	15.4168	15.3284	16.2451	15.7671	15.9142	15.1977	16.4507	15.6297	15.6838	15.3921	16.3776	16.194	15.9471	15.2739	16.7406	-0.349757	-0.4097	-0.174287	-0.274109	-0.281495	0.041059	-0.0161039	-0.00242191	0.0852131	0.0316107	-0.137497	0.167322	0.326562	0.117571	0.0778144	0.120518	0.389119	0.0752039	0.149585	-0.00967626	0.0530676	0.00854427	-0.0686197	0.0804761	-0.32033
F9WZ36	NaN	9.88169	9.71277	11.4017	8.57262	9.88422	9.51759	11.2521	7.17213	8.20643	9.82306	11.3881	7.78149	10.0681	10.0591	11.3844	7.78979	8.2151	9.96766	11.8096	9.10915	9.44313	9.80508	12.4227	NaN	0.348421	0.0234674	-0.0829632	NaN	0.18286	-0.429484	-0.367408	-0.0260127	-0.035501	NaN	-0.510757	NaN	0.803793	0.377394	-0.200083	NaN	-0.861171	0.163345	0.168066	NaN	0.0368536	-0.0992218	0.508401	-0.0523692
F9WZ49	10.3651	10.8709	11.0504	8.19086	10.5089	11.4593	10.9437	9.16707	10.2687	10.2404	10.9788	8.43308	10.3397	11.1228	10.8389	8.11301	10.4683	10.725	11.1861	8.12789	10.8697	11.0645	10.9566	6.33716	0.454124	-0.293071	0.1829	0.254459	0.16217	0.127221	-0.181581	1.09583	0.567188	-0.057977	0.00228679	-0.107452	-0.258866	0.22775	-0.0209839	0.0768187	0.0696463	0.0180567	0.203546	0.034631	-0.429362	0.0274955	-0.125904	-2.02892	0.788776
F9WZ50	12.0142	9.77306	11.9151	NaN	11.8642	9.42853	12.03	NaN	11.8114	8.93493	11.848	NaN	12.2747	8.07698	12.0701	NaN	12.4315	9.35207	12.3112	NaN	12.5983	9.59091	11.9629	NaN	0.407514	0.330152	0.0171105	NaN	-0.178179	-0.182459	-0.125713	NaN	NaN	-0.219215	-0.150608	0.308113	-0.0195278	-1.09697	0.179756	NaN	0.3372	0.366166	0.298154	NaN	-0.396399	0.274997	-0.150093	NaN	0.34209
F9WZ52	13.898	14.6284	12.7657	12.3429	14.3282	14.9399	12.8224	12.2902	14.1204	14.5669	13.1027	12.0526	14.2916	15.2445	12.9747	12.5747	14.2776	14.7655	13.1861	12.6647	14.2599	14.7645	12.7557	12.3989	0.261156	-0.440062	-0.0439908	0.0806689	0.255587	-0.296631	-0.244993	-0.106802	-0.139137	0.123798	0.128145	0.314526	-0.0328854	0.445061	0.172689	0.212709	0.153023	0.15405	0.261451	0.245599	-0.765025	-0.176943	-0.268954	-0.293039	0.340433
F9WZ58	15.2366	17.026	16.3044	16.6976	15.6203	16.5513	16.7313	16.8902	15.517	15.4166	16.5234	16.6482	16.0647	16.0672	16.4496	16.9873	15.8577	16.2077	16.7928	17.0508	16.6419	16.5614	16.8657	17.0377	-0.0273743	0.470849	-0.181903	-0.0625511	-0.0793909	-0.171964	-0.0127636	-0.00479751	-0.0414759	-0.13215	-0.102364	-0.322543	0.113121	-0.219056	-0.029073	0.127275	0.106112	0.109508	0.191519	0.13375	-0.0101045	0.133205	0.164371	-0.1522	0.0159373
F9WZ64	NaN	12.4748	6.67186	9.26519	NaN	12.2558	7.71939	8.71983	NaN	11.3854	7.49362	6.99503	NaN	11.8442	6.08334	8.34154	NaN	11.941	7.66484	9.15601	NaN	12.2753	7.53419	9.98428	NaN	0.19519	-0.397773	0.646656	NaN	-0.191867	0.391983	-0.0335427	-1.553	0.254718	NaN	-0.0780604	NaN	-0.166425	-0.978671	-0.376787	NaN	0.118436	0.480193	0.380612	NaN	0.122726	0.24955	0.936061	-0.288088
F9WZ74	11.2063	12.482	12.0072	12.315	12.4252	13.3652	12.9097	13.3264	12.7846	13.2053	13.139	13.778	13.4232	14.528	12.834	14.2983	13.6718	14.6225	13.1456	14.2493	12.2849	12.3534	12.6138	12.7074	-0.867305	-1.19422	-0.6428	-1.00561	-0.0841424	-0.479076	0.00196335	-0.129061	0.527829	0.319727	0.35561	0.345155	0.662051	1.12076	0.19163	0.877907	1.1105	1.40324	0.380617	0.771825	-1.17671	-1.19586	-0.251137	-1.04288	-0.0108374
F9WZ76	13.7648	14.9758	13.8035	14.1894	13.856	15.1052	14.122	14.3136	13.9228	14.3203	14.1122	14.1807	14.4599	15.0055	14.0162	14.3673	14.2202	14.7988	14.2682	14.7195	14.9324	14.704	14.0624	14.531	0.13115	-0.0926548	-0.135651	-0.0690444	-0.213301	-0.131323	-0.0749324	-0.0797302	-0.00729112	0.00375273	-0.0662239	0.0679825	0.138653	0.206085	0.0846425	0.00900368	0.098932	0.187369	0.213986	0.304208	-0.0892095	-0.237458	-0.091798	-0.157146	0.102353
F9WZ83	14.5527	15.8297	13.983	14.8432	15.1114	15.9654	14.3924	14.947	15.0381	14.8229	14.087	14.6653	15.3688	15.4218	14.1353	14.917	15.1483	15.2241	14.1416	14.8465	16.274	15.7259	14.4903	15.3052	-0.137094	0.0812671	-0.0970526	0.0476425	-0.0141213	0.0488389	0.0545644	0.0165212	-0.0597499	-0.162263	-0.00709529	-0.109472	-0.00858437	-0.0577176	0.0628827	0.021616	-0.0292219	-0.0673591	-0.0534309	-0.105931	0.196117	0.104443	0.195299	0.0799014	-0.170249
F9WZ94	13.7171	14.5451	12.584	13.525	14.0171	14.9961	12.8934	13.9765	13.9381	14.2524	12.6311	13.866	14.276	14.5257	12.7156	13.9721	13.9453	14.4107	12.1444	14.0974	15.0668	14.7214	12.8233	14.3287	0.116157	-0.280266	0.0769454	-0.310814	-0.019633	0.00262755	0.128526	0.00579082	0.100684	-0.0452114	-0.0182509	0.243121	-0.0126141	-0.0307459	0.216162	0.036446	-0.1434	0.0423114	-0.477687	0.104671	0.077741	0.0229521	0.101265	0.0632219	-0.165789
F9WZA3	12.9158	11.8889	11.3494	NaN	13.029	12.3972	11.7589	NaN	13.0747	11.7917	11.2825	NaN	13.3692	12.1588	11.114	NaN	13.0589	11.8279	11.3028	NaN	14.0839	12.1159	11.2318	NaN	0.219594	-0.391312	0.134404	NaN	-0.102899	-0.0510807	0.286127	NaN	NaN	-0.101802	0.0231936	0.327576	-0.0145943	0.147483	-0.0933657	NaN	-0.124979	0.00465919	-0.0271909	NaN	-0.000315607	-0.037326	-0.198172	NaN	0.0661665
F9WZB1	10.3744	12.3751	11.2136	11.2112	10.4599	12.4593	11.8156	11.2855	11.3357	11.7455	11.7366	10.8401	11.4435	12.1789	11.2649	11.5396	11.3523	12.2437	11.5008	11.3485	11.9285	12.4755	11.6039	11.576	-0.215593	-0.121388	-0.184076	0.0361218	-0.565756	-0.205311	0.160182	-0.0244155	-0.264383	0.169681	0.390369	0.065114	0.165872	-0.0486378	-0.125135	0.264815	0.274607	0.204176	-0.0118382	0.0166118	-0.0494992	0.106047	-0.00881367	-0.0287501	-0.12598
F9WZB3	13.0072	10.9981	12.1304	14.2612	13.5025	10.8255	12.5305	14.4598	13.4788	10.0318	12.5978	14.1997	14.0742	10.1862	12.2874	14.4432	13.7959	10.6976	12.467	14.539	14.3056	10.3391	12.438	14.7124	-0.127725	0.23489	-0.153176	-0.0495635	-0.0682226	-0.105772	-0.0109127	0.0141363	-0.0405217	0.144913	-0.0115693	0.0846524	0.251654	-0.308007	0.011397	0.0326349	0.173299	0.391376	0.0683889	0.0714028	-0.217436	-0.297139	-0.0606104	-0.0280887	0.126925
F9WZB9	12.3757	14.2913	11.3593	14.6178	13.0214	14.5739	11.8113	14.8783	12.8725	13.594	11.9988	14.5363	13.1939	14.1445	11.4292	14.7392	13.0342	14.0662	11.4827	14.6914	13.9237	14.3308	11.4368	15.0978	-0.135415	-0.125629	-0.102173	-0.017204	0.0744814	-0.0111419	0.0921315	0.108435	-0.0282019	0.368108	0.00598404	-0.0068801	-0.00487489	-0.00348451	-0.0246112	0.00439314	0.0353243	0.106236	-0.0937857	-0.100513	0.0245004	0.0408999	-0.23967	0.0330908	-0.0598107
F9WZD1	12.3203	NaN	12.0217	11.6411	12.5939	NaN	11.9266	11.5592	12.6174	NaN	11.9674	11.3612	12.7076	NaN	11.9796	11.5082	12.3575	NaN	11.2566	12.0311	13.3129	NaN	12.1633	12.4642	0.227745	NaN	0.260766	0.00540233	0.0656893	NaN	-0.092123	-0.211352	-0.204064	0.0371631	0.169479	NaN	-0.0725115	NaN	0.226211	-0.227297	-0.222728	NaN	-0.61937	0.238545	-0.167674	NaN	0.187352	0.398764	0.0251567
F9WZD7	14.617	15.8734	14.9768	14.6515	14.7104	16.2456	15.02	14.8321	14.8838	15.5326	15.1999	14.6206	15.129	16.0381	14.8806	14.8564	14.7319	15.5535	14.8096	14.861	15.7818	15.7906	14.9656	15.0859	0.200369	-0.215736	0.126289	-0.0413078	-0.141871	-0.0115994	-0.0882917	0.00445233	-0.00173803	0.180138	0.111831	0.25955	0.0248507	0.217935	0.037709	0.0638264	-0.172357	-0.0785916	-0.155945	0.0113238	-0.0228233	-0.171558	-0.0998997	-0.0365567	0.100113
F9WZE6	11.6232	12.616	12.2755	NaN	12.2693	12.8919	12.6182	NaN	11.8477	12.8353	12.4688	NaN	12.8844	14.0479	12.7808	NaN	13.1223	13.8141	13.324	NaN	11.9922	12.5109	12.7703	NaN	-0.107544	-0.753471	-0.305889	NaN	0.102798	-0.645699	-0.220894	NaN	NaN	-0.28186	-0.238439	0.281836	0.465967	0.947338	0.207061	NaN	0.90388	0.901575	0.627681	NaN	-1.12666	-0.731579	-0.0260985	NaN	0.239145
F9WZE7	14.684	15.2195	14.2605	14.7434	14.9634	15.6207	14.2617	15.0113	14.8237	14.7845	14.2059	14.7843	15.174	15.2138	14.1123	14.9622	14.8401	14.7605	14.1419	14.9632	16.4446	15.299	14.44	15.4226	0.088123	-0.180313	0.148331	-0.112641	-0.068239	0.052774	-0.108195	0.0204197	-0.00127263	-0.0755439	-0.127574	0.200748	-0.109533	0.0829266	0.00774918	0.00637138	-0.243452	-0.182303	-0.0852137	-0.0497018	0.460676	0.0261682	0.112872	0.136824	-0.19826
F9WZE9	13.9777	15.6105	14.7634	15.2032	14.3882	15.971	14.8915	15.2925	14.2792	14.7031	14.5486	14.9981	14.695	15.1468	14.3993	15.1771	14.2784	14.8091	14.3809	15.2548	15.7362	15.3132	14.7162	15.4299	-0.022313	0.101368	0.271635	0.102356	-0.0476067	0.293791	0.141944	0.0568242	-0.0322262	-0.112357	-0.0762414	0.0101264	0.00736202	-0.0933019	-0.0848351	-0.0234826	-0.20934	-0.243038	-0.225879	-0.00285272	0.34814	-0.0689456	0.00949258	-0.100619	0.0662446
F9WZF3	12.8304	14.6887	14.0609	13.846	13.0779	14.6371	14.0076	13.6573	13.1339	13.5182	14.0107	13.6373	13.3496	14.2049	13.7919	13.7099	13.1053	13.979	13.8212	13.6974	14.4157	14.5418	14.1215	14.2972	0.0706887	0.17696	0.216891	0.163564	-0.117549	-0.0427284	-0.09428	-0.159936	0.025395	-0.00262115	0.0188059	-0.17753	-0.0977984	-0.0379435	-0.0445637	-0.072261	-0.142105	-0.0757966	-0.137896	-0.141872	0.267958	0.157039	0.0624698	0.18511	-0.011118
F9WZF7	14.1032	14.1894	10.7701	13.3962	14.5063	14.1928	10.7424	13.1871	14.1981	13.5865	10.0415	13.0501	14.5378	14.0541	10.3516	12.9897	14.3348	13.7595	10.5013	13.1919	15.1516	14.2961	10.9076	13.9142	0.190307	-0.0737859	0.342573	0.233119	0.15769	-0.238552	0.0571072	-0.110834	-0.0425082	-0.555255	-0.0701367	0.139352	-0.0626831	0.0598315	-0.0682901	-0.273162	-0.0658131	-0.0467462	-0.0411854	-0.128051	-0.149364	0.1599	0.26505	0.321436	0.023798
F9WZI3	13.2062	13.8503	12.8977	12.7405	13.5207	13.9622	13.2016	12.6244	13.4392	12.9919	13.0441	12.5346	13.7728	13.3782	12.6022	12.6822	13.6806	13.1176	12.6807	12.9145	14.4615	13.5424	13.044	12.8743	0.0851205	0.126367	0.110878	0.137193	-0.0360928	0.0701742	0.156985	-0.11376	0.00179596	0.088058	-0.0373104	0.0840653	-0.0358946	-0.0767971	-0.177012	-0.0208697	0.0717866	-0.149316	-0.221144	0.154372	-0.0476093	-0.0544931	0.0422338	-0.158731	0.16954
F9WZJ0	16.2933	17.511	15.8642	17.2494	16.417	17.4583	16.2999	17.4667	16.2905	16.8843	16.1758	17.2156	16.8375	17.4037	16.2271	17.3889	16.7602	17.1294	16.713	17.6086	17.2068	17.213	16.0739	17.4353	0.21813	-0.00578843	-0.236562	-0.0195528	-0.0938837	-0.226572	-0.0585808	0.0629258	0.0171341	-0.0942499	-0.140016	0.183611	0.0747696	0.155854	0.13398	0.020087	0.197397	0.0696206	0.497276	0.18272	-0.256397	-0.176725	-0.241863	-0.263314	0.223631
F9WZJ7	14.6659	15.3482	14.7659	15.2456	14.8283	15.4748	15.0702	15.4523	14.6898	14.6224	14.9443	15.2493	15.118	15.0652	14.882	15.3921	14.7655	14.7903	14.9177	15.4472	15.7754	15.0956	14.9632	15.6172	0.251131	0.0319831	-0.033092	-0.0298865	-0.0221439	-0.00949541	0.0134729	0.0419853	0.0442912	-0.0239184	-0.0803569	0.122224	0.0156797	0.017864	0.0906427	0.0167771	-0.136944	-0.0689565	0.00373184	0.0148726	-0.0273661	-0.0936192	-0.050837	-0.0880397	0.119999
F9WZM0	11.5163	14.7923	12.9497	14.8474	12.3422	14.7258	13.526	14.9293	12.516	13.5735	13.6226	14.8721	12.7883	14.0966	13.2952	15.015	12.9711	14.3943	13.6271	14.837	13.1244	14.1991	13.0617	14.9247	-0.467661	0.245214	-0.272462	0.0682693	-0.0775125	0.0106454	0.046093	0.0153357	0.163474	0.231215	0.176643	-0.1575	0.116709	-0.181524	0.0806717	0.136058	0.499447	0.30415	0.289922	-0.099001	-0.247625	-0.220985	-0.375439	-0.284135	0.175386
F9WZM4	13.8339	15.097	13.8491	14.7756	14.3002	15.1616	14.2942	14.8254	14.2981	13.9177	14.2214	14.6555	14.6614	14.4596	14.0521	14.8519	14.4928	14.4621	14.1761	14.9355	15.5594	14.9497	14.3127	15.0806	-0.131353	0.172204	-0.176911	0.0465809	-0.100741	0.068763	0.0103938	-0.0384106	-0.00299688	0.0260725	-0.0224744	-0.190966	0.00854728	-0.196215	0.0337411	0.0231751	0.0398831	-0.00567371	0.0350594	0.0496978	0.206138	0.151888	0.0716437	-0.0780463	-0.110276
F9WZM5	11.7124	13.1411	12.5364	13.0571	11.9691	13.1295	12.7582	12.9968	11.854	11.9167	12.6458	12.8394	12.1571	12.3354	12.5602	12.6655	11.9264	12.5145	12.6266	13.0427	13.0639	12.8569	12.7231	13.1418	0.157622	0.241927	0.0195535	0.225	-0.0213886	0.0621883	-0.0163658	0.0298587	0.0777951	-0.0402646	-0.0561364	-0.166401	-0.0852792	-0.294811	0.0510422	-0.266367	-0.115966	0.0723578	-0.00525193	0.0536817	0.121148	0.0847387	-0.00871338	-0.119969	0.141725
F9WZN1	15.5844	16.8653	16.0449	16.6668	16.1341	16.8782	16.4297	16.7737	16.1086	15.7531	16.3385	16.522	16.5885	16.4419	16.1839	16.7041	16.4184	16.3357	16.562	16.6702	17.2671	16.499	16.3058	16.7939	-0.206746	0.152954	-0.141032	0.103445	-0.0927155	-0.00225541	-0.0139509	0.0754822	0.0291564	-0.0166667	-0.0378513	-0.143193	0.109793	-0.00146924	0.00567034	0.0410223	0.13958	0.0803771	0.261066	-0.0499515	0.0879391	-0.0864126	-0.0950866	-0.199154	0.0503337
F9WZQ1	14.3955	15.1526	14.7796	14.9979	14.6087	15.268	15.1329	15.2702	14.5813	14.4581	15.0637	14.9794	14.9462	14.9833	14.9084	15.1734	14.8866	14.7763	15.0933	15.2429	15.3871	15.0885	15.1533	15.412	0.153654	-0.0520612	-0.117381	-0.0562894	-0.0688725	-0.104675	-0.0218601	0.0811646	-0.00428753	-0.00252213	-0.0158708	0.0695518	0.0167997	0.0475987	0.0190663	0.0194326	0.157064	0.0287132	0.0813339	0.0318361	-0.242775	0.0108722	0.0413629	-0.0718563	0.0475797
F9WZQ2	16.9405	17.4901	17.3542	17.4729	17.3451	17.9501	17.3917	17.6322	17.2982	17.2006	17.3714	17.5508	17.3819	17.6338	17.2028	17.5795	17.1074	17.1665	17.1954	17.7081	18.2138	17.5353	17.2827	17.9721	0.118457	-0.256119	0.179444	-0.0545599	0.0872718	0.0358156	-0.040849	-0.0301583	0.0938232	0.027297	0.120762	0.270394	-0.127746	0.15653	0.0355865	-0.047759	-0.202382	-0.122706	-0.0944305	0.0236969	0.00363654	-0.0839156	-0.107048	0.0149571	0.0398981
F9WZR6	12.4887	12.915	13.0011	13.4278	12.7858	12.9572	13.0796	13.6798	12.7144	11.9394	12.9821	13.4964	13.1582	12.5809	12.6694	13.5786	12.6541	12.475	12.8425	13.659	14.1109	12.6578	13.1882	13.9037	0.0624397	0.077302	0.165561	-0.0712693	-0.0762439	-0.0485709	-0.0138061	0.0458648	0.0677545	-0.0227465	-0.067242	-0.0822701	0.0443338	0.0121375	-0.158569	-0.0202884	-0.259838	0.0943128	-0.108069	0.00302891	0.29655	-0.0529113	0.13763	-0.0250905	-0.0305362
F9WZT7	14.1387	13.8146	13.512	13.8521	14.4338	13.9261	13.7109	14.1177	14.342	13.1695	13.662	13.7951	14.7098	13.7327	13.7226	14.1677	14.794	13.6339	13.9196	14.3654	15.3993	13.9172	13.7834	14.4371	0.0614705	-0.134568	-0.0815142	-0.145282	-0.0790738	-0.191123	-0.140375	-0.0145361	-0.131789	-0.100779	-0.0905729	0.0363933	-0.055027	0.0525071	0.1367	0.0705185	0.229131	0.141759	0.21108	0.211086	-0.0659273	0.0950319	-0.025112	0.0100018	-0.0784722
F9WZT8	13.2781	13.4628	11.9977	12.7376	13.9177	13.6697	12.553	12.7367	13.6274	13.0975	12.6076	12.5986	14.0734	13.6689	12.4399	12.7073	14.1226	13.4081	13.0157	12.5784	14.3501	13.5369	12.5707	13.0016	-0.0577172	-0.261353	-0.408111	0.135994	0.146129	-0.222532	-0.110623	0.000310368	0.0675033	0.0324652	-0.0637607	0.18945	0.0499751	0.213735	0.0416224	0.0059125	0.299104	0.140959	0.494843	-0.180053	-0.373731	-0.060259	-0.0501966	-0.0296675	-0.0193332
F9WZU8	13.7888	13.927	13.3167	11.063	14.0521	13.6221	13.0469	10.9394	13.979	13.1098	13.2287	11.1498	14.3656	13.2572	13.0377	11.2388	14.1102	13.1091	12.7479	11.2661	15.2352	13.1878	13.0644	11.0872	0.0927329	0.308034	0.367907	0.0640541	-0.0796632	-0.165033	-0.159687	-0.194343	0.221381	0.110589	-0.0724856	0.306933	-0.0181256	-0.0928754	0.0965061	0.140036	-0.0735255	-0.0528839	-0.315934	0.110289	0.151067	-0.304175	-0.0993808	-0.341417	0.356658
F9WZV1	NaN	8.86987	7.96532	10.8082	6.18816	8.95847	8.04111	10.5312	8.44936	7.29627	8.29232	10.4166	7.73748	7.92991	8.60559	10.9169	7.47241	7.91862	9.54496	10.1955	9.50643	9.50762	9.10769	10.7938	NaN	0.206249	-0.502604	0.322903	NaN	0.126762	-0.684589	-0.0889095	0.00183634	-0.344871	NaN	-0.551259	NaN	-0.464752	0.145284	0.331877	NaN	-0.287991	0.962024	-0.446619	NaN	0.970991	0.424756	-0.121088	-0.416037
F9WZV2	10.0681	NaN	7.67172	10.6401	10.6127	NaN	8.22139	10.4458	10.7899	NaN	7.84285	10.207	11.3471	NaN	5.99628	10.5193	10.4164	NaN	8.11061	9.74683	12.2496	NaN	7.70287	10.5618	-0.28679	NaN	0.205671	0.411697	-0.177931	NaN	0.497572	0.0826368	0.0491532	0.207541	0.0795872	NaN	0.304618	NaN	-1.46215	0.191183	-0.426198	NaN	0.529553	-0.638391	0.506714	NaN	0.0218133	-0.0962793	-0.0338897
F9WZV8	13.4584	14.3775	14.0039	15.0467	13.6711	14.3981	14.4192	15.4385	13.8114	13.4937	14.2186	15.1663	14.2981	13.9936	14.0918	15.3419	14.0709	13.8863	13.9112	15.4861	14.6641	14.1282	14.5674	15.6842	0.0218208	0.0811495	-0.0732511	-0.188781	-0.201206	-0.0664053	0.0843416	0.068171	0.00126493	-0.0277463	0.0194127	0.0134199	0.173868	-0.0337931	0.0223484	0.00655337	0.146613	0.0468755	-0.280929	0.093764	-0.160509	-0.0412466	0.275237	0.019028	-0.0628929
F9WZW0	9.55538	9.96016	8.68345	11.2485	9.97327	10.384	9.10384	11.2495	10.3442	9.63968	9.76916	10.4749	11.3082	9.97341	9.70235	11.2549	10.5975	9.97914	8.9426	10.6607	10.8459	10.0042	9.5763	11.3924	-0.32295	-0.280108	-0.487925	0.326756	-0.340778	-0.0243227	-0.325311	0.192983	-0.376278	0.428519	0.110483	0.215504	0.742234	0.00210211	0.53859	0.233354	0.231491	0.195876	-0.343787	-0.417855	-0.42048	-0.109052	0.189915	0.0410404	-0.116413
F9WZX8	12.8647	10.7746	NaN	12.7469	13.1652	10.7303	NaN	13.0241	12.8262	10.4582	NaN	12.5059	13.3178	10.8958	NaN	12.8111	13.017	10.5713	NaN	13.2673	13.8712	10.8265	NaN	13.4781	0.24672	-0.184986	NaN	-0.100256	0.111504	-0.397389	NaN	0.042152	-0.27071	NaN	-0.147136	0.314683	0.0122774	0.205156	NaN	-0.135845	-0.0886099	0.0686774	NaN	0.263327	-0.134756	-0.00614088	NaN	0.201333	-0.032986
F9WZY3	13.14	13.3056	11.9475	12.7264	13.3615	13.7415	11.9765	12.845	13.2622	12.9573	11.9678	12.8117	13.5749	13.5152	12.0692	12.7997	13.1866	13.0685	11.5217	12.7491	14.306	13.4179	12.322	13.1818	0.227195	-0.278859	0.104961	-0.00076969	0.0129936	-0.0111085	-0.123811	-0.0170003	0.155042	-0.0440283	-0.005969	0.188897	-0.0254806	0.199675	0.234272	-0.0273054	-0.213872	-0.0589606	-0.435844	-0.134923	0.00513351	-0.0396436	0.26445	0.0249566	-0.0505922
F9WZZ4	10.2182	11.8736	12.0694	11.3907	10.5642	11.9664	12.2649	11.2166	10.4589	10.4832	12.2797	11.2566	10.4579	11.5884	12.1554	11.136	10.6924	11.0939	12.2837	11.0806	11.2488	11.765	12.1368	11.7438	0.170531	0.161678	-0.00402929	0.211719	0.0808578	0.086432	-0.0662748	-0.0971485	0.148194	0.0369913	0.0558747	-0.412619	-0.277384	0.145428	0.0896275	-0.142695	0.157009	-0.161034	0.0952707	-0.255241	-0.186888	0.180115	-0.151586	0.135171	0.140772
F9WZZ7	15.422	16.2691	14.865	15.6293	15.8105	16.4169	15.3451	15.9855	15.9007	15.5438	15.2396	15.6669	16.103	16.1625	15.1985	15.8239	15.9752	15.8904	15.4138	16.0304	17.0076	16.1252	15.1201	16.0867	-0.055427	-0.0490773	-0.207112	-0.116041	-0.102648	-0.0693165	0.0152332	0.105328	-0.00797348	-0.00178764	0.067947	0.0417139	-0.0620345	0.113318	0.133983	-0.0212426	0.0100728	0.0293053	0.226692	0.128231	0.14209	-0.0659436	-0.167009	-0.0883015	-0.0621233
F9X002	11.3568	13.9829	14.0456	15.4596	12.3279	13.9143	14.3604	15.3363	12.2304	12.5589	14.3438	15.0448	12.3412	13.0425	14.098	15.0986	12.1363	13.1774	14.3399	15.1407	13.4181	13.6294	14.5007	15.475	-0.385936	0.348514	-0.110922	0.32553	0.149509	0.111819	-0.05385	0.067396	-0.0187352	0.0180335	0.132316	-0.25945	-0.0891415	-0.322898	-0.0508589	-0.135245	-0.0941093	5.12004e-05	0.0683956	-0.15021	0.287362	0.121963	0.129201	-0.0887349	-0.0681513
F9X003	14.415	15.891	13.8291	12.7404	14.7262	16.3202	13.9652	12.9273	14.7317	15.3256	13.8112	12.7007	15.0888	15.8753	13.562	13.0459	14.614	15.3726	13.5402	13.1387	16.0554	15.8993	13.9475	13.2753	0.0355641	-0.139795	0.178174	-0.105893	-0.0890052	0.121264	0.0564242	-0.053825	-0.0750147	-0.00904526	-0.00308461	0.11082	0.0217697	0.11341	-0.0813299	0.099859	-0.253166	-0.201186	-0.225719	0.135534	0.287922	-0.00451248	0.0814955	-0.000660568	-0.0990486
F9X004	16.8439	17.6333	17.4005	17.571	17.2665	17.4231	17.7831	17.711	17.2603	16.3651	17.6678	17.5211	17.6569	16.7393	17.5952	17.7334	17.6641	17.426	17.532	17.9429	17.9042	17.497	17.9641	17.9158	-0.029683	0.202525	-0.131724	-0.0363877	-0.0428421	-0.175796	-0.00690518	-0.0313132	-0.0158599	-0.0336669	0.0313569	-0.2496	0.0957114	-0.422582	0.0706137	0.0262185	0.302886	0.452244	-0.115243	0.178662	-0.357429	0.193209	0.216925	-0.12132	0.018336
F9X029	11.2342	13.1455	11.8046	NaN	12.0201	13.138	12.009	NaN	11.5387	12.3308	11.7467	NaN	12.1783	12.6728	11.8952	NaN	12.2071	12.6856	11.7464	NaN	12.8667	12.6478	11.9907	NaN	-0.214281	0.125287	0.0640905	NaN	0.135918	-0.0503123	0.0106551	NaN	NaN	-0.163066	-0.265141	0.126604	0.0422427	-0.0785446	0.162293	NaN	0.27102	0.122391	-0.10915	NaN	0.0302418	-0.245425	0.0351771	NaN	0.0517008
F9X035	14.9182	15.3717	14.8206	15.3445	15.2594	15.54	14.9618	15.4237	15.1007	14.7734	14.9067	15.2955	15.4519	15.3404	14.6838	15.3727	15.1877	14.9863	14.5448	15.3943	15.8221	15.3693	14.8729	15.745	0.187277	-0.108641	0.147064	0.0403102	0.0927592	-0.108455	0.030478	-0.0153243	0.0618288	0.0639237	0.0144342	0.109187	0.0333767	0.128983	0.0178689	-0.0312552	-0.0309497	-0.0370124	-0.243684	-0.066688	-0.296898	0.0159378	-0.015651	0.0111286	0.137873
F9X036	11.9009	12.9381	11.6102	12.422	12.1129	13.239	11.9899	12.6157	11.9396	12.4137	11.9249	12.4855	12.4791	12.9675	11.715	12.7575	12.1016	12.662	11.7354	12.6762	13.4594	12.9503	11.6275	13.1164	0.127676	-0.17381	-0.0320114	-0.131751	-0.0959812	-0.0410167	0.0898643	-0.0729498	0.00221972	0.113406	-0.188951	0.117859	0.0182727	0.124556	0.0803432	0.103981	-0.15922	0.00706993	-0.0218789	-0.0344669	0.298204	-0.0346578	-0.229723	0.132967	-0.0941718
F9X037	11.1576	NaN	10.6645	13.092	11.4839	NaN	10.7095	13.0984	11.2212	NaN	10.8367	13.0926	11.5259	NaN	10.4469	13.1148	11.5646	NaN	11.1071	13.0478	12.3146	NaN	10.2851	13.2557	0.172056	NaN	0.114484	0.100236	0.0626544	NaN	-0.0983119	-0.0281735	0.171304	0.117364	-0.119756	NaN	-0.147289	NaN	-0.0955554	0.0232145	0.091358	NaN	0.442021	-0.100848	-0.0590248	NaN	-0.480002	-0.165733	0.363845
F9X042	16.6465	16.6168	16.9172	17.0658	17.0796	17.4131	17.2087	17.379	17.0994	16.5244	17.2152	17.316	17.6724	17.1054	16.9215	17.351	17.4019	16.805	16.6876	17.3082	18.3681	16.9008	17.2052	17.847	-0.172386	-0.527577	0.0161935	-0.18691	-0.175006	0.100621	0.0499077	-0.00857597	0.133798	0.144972	-0.0749047	0.196034	0.165859	0.229985	0.0281205	-0.00156049	0.095319	0.117582	-0.328438	-0.101369	0.161119	-0.116644	0.0892441	0.164618	-0.292254
F9X044	13.3225	13.5971	12.8881	12.1625	13.4444	13.7985	13.2251	12.2776	13.375	12.8825	13.1882	12.1415	13.9184	13.3946	12.9595	12.3134	13.8199	13.3166	13.0985	12.4619	14.5231	13.5621	13.2208	12.3587	0.147687	-0.0782751	-0.0836853	0.00165026	-0.166156	-0.0450066	-0.00445791	-0.0180383	0.0512031	0.0471829	-0.155142	0.023221	0.055983	-0.0118384	-0.00470358	0.0528228	0.157398	0.0981748	0.0117123	0.14417	-0.0397695	0.0137243	0.0339515	-0.231807	0.0528195
F9X050	13.3246	12.9795	13.0862	13.6373	13.7678	13.1333	13.5572	13.9637	13.616	11.8914	13.3587	13.5709	14.2388	12.5545	13.1212	13.7847	14.108	12.7803	13.6533	13.8712	14.6631	12.712	13.5256	13.8916	-0.0693737	0.0541936	-0.172573	-0.0241686	-0.0619239	0.0399167	0.0406576	0.167397	-0.020044	-0.0694066	-0.133378	-0.217865	0.157193	-0.101891	-0.130011	0.0234725	0.226381	0.312	0.279487	0.0529	-0.118899	-0.0863547	0.0518462	-0.199557	0.0352606
F9X052	9.51578	10.8155	9.54932	11.1858	9.89726	10.9518	10.046	11.037	10.2882	10.9327	10.1734	11.0776	10.1657	11.4746	9.30248	11.0326	10.609	11.4024	9.12797	11.3277	10.082	11.3133	9.93402	11.8232	-0.0181316	-0.582997	-0.014645	0.0636064	-0.0723731	-0.614827	0.22429	-0.220039	0.0259247	0.440194	0.398887	0.350206	-0.0558585	0.344988	-0.253869	-0.189393	0.587407	0.460892	-0.551013	0.0486091	-0.839931	0.0417374	0.155042	0.271292	-0.0450769
F9X064	13.7458	15.3273	13.9819	13.48	14.1614	15.2703	14.399	13.4682	14.0661	14.1798	14.2186	13.3908	14.38	14.7366	13.9794	13.3417	14.1622	14.5846	14.23	13.4481	15.1977	15.0274	14.3511	13.824	0.019326	0.222854	-0.0865064	0.113001	-0.000803545	-0.00231072	0.0728058	-0.0336287	0.0943143	-0.0191329	-0.0157397	-0.108646	-0.0340745	-0.0989662	-0.0813849	-0.125166	-0.0518958	-0.0628714	0.0465766	-0.0757741	0.0831876	0.0499399	0.0676418	0.0272538	0.0101628
F9X065	12.899	14.825	13.3149	14.8249	13.2872	15.0386	13.4144	14.9402	13.1912	14.0426	13.2983	14.6483	13.5886	14.4829	13.0967	14.7839	13.4155	14.2706	13.1802	14.9141	14.309	14.8231	13.3618	15.2938	0.00967467	-0.00565396	0.162056	0.0491579	-0.0378253	0.0399247	0.00383653	0.0296314	-0.0569442	-0.0237263	-0.0535521	0.028076	0.0116455	-0.0787808	-0.0485074	-0.0916233	0.038458	-0.103019	-0.0876507	-0.0185518	0.0315994	0.119453	-0.00600813	0.08833	-0.00453499
F9X074	6.56346	9.56371	7.70155	NaN	8.5072	8.62311	8.66903	NaN	9.79476	6.67412	8.93455	NaN	9.32209	7.79214	8.28434	NaN	9.34525	8.77023	9.59751	NaN	10.3281	8.58079	9.58201	NaN	-1.85428	0.979531	-0.968375	NaN	-0.346261	-0.129148	-0.258672	NaN	NaN	0.0953569	1.02164	-1.09397	0.216735	-0.523079	-0.377966	NaN	0.439831	0.643061	0.812575	NaN	0.522335	0.123603	0.697081	NaN	-1.06205
F9X0A1	15.4952	16.6865	15.0505	15.9779	15.9592	16.8302	15.2711	16.1048	15.9034	15.8069	15.3124	15.9488	16.1251	16.4587	15.1567	16.0727	16.0316	16.2715	15.2235	16.0997	16.7667	16.6439	15.2563	16.4465	0.00737488	-0.013291	-0.0363417	-0.00544031	0.0356748	-0.0376291	-0.0735046	-0.0133377	0.0360283	0.0562574	0.0602417	-0.076749	-0.0503124	0.0278753	0.0775073	-0.0103524	0.0561672	0.0287051	0.0216318	-0.0404208	-0.109146	0.0710886	-0.0455503	0.0335229	0.000596729
F9X0A5	13.446	11.7322	12.9821	13.5447	13.7938	12.1551	13.1918	13.7646	13.9049	11.5348	13.0629	13.5046	14.0194	11.9516	12.8155	13.6995	13.7434	11.2524	13.0262	13.6547	14.1791	11.8538	13.2319	13.9846	0.157352	-0.264619	0.0552563	-0.0222777	0.0693894	-0.00977674	0.00715102	0.0627214	0.00807671	-0.0332044	0.260843	0.354098	0.0431099	0.223708	-0.103665	0.0326723	-0.0330134	-0.287394	-0.0156468	-0.0691105	-0.49768	-0.0160159	0.0901084	-0.0120821	0.0903453
F9X0B1	11.8898	14.3226	14.0854	13.4841	12.3291	14.486	14.2936	13.5653	12.1526	13.2485	14.121	13.375	12.4693	13.8057	13.9733	13.55	12.2519	13.75	14.2059	13.6475	13.229	14.1137	14.3444	13.8515	0.0619535	0.118005	0.0396784	0.0302802	0.0654846	0.113316	-0.00986984	-0.0232867	-0.00824256	-0.0939283	-0.030635	-0.139992	-0.0462156	-0.129852	-0.0647515	-0.00355399	-0.0636726	0.0024233	0.0452218	0.0368122	0.0130851	0.0361007	0.0836495	-0.0320091	0.0372727
F9X0C0	9.97284	8.12247	NaN	12.1139	11.1182	9.70665	NaN	12.4122	10.9523	7.48414	NaN	12.2757	11.2661	8.04674	NaN	12.3893	10.9766	7.88941	NaN	12.1014	11.3033	6.38225	NaN	12.5942	-0.399663	-0.0663065	NaN	-0.0754398	0.310009	1.3498	NaN	0.0880152	0.156908	NaN	0.224429	0.111454	0.206034	0.126931	NaN	0.100173	0.11646	0.157647	NaN	-0.244818	-0.457269	-1.67952	NaN	-0.024838	0.540074
F9X0C2	13.0338	13.956	10.9835	13.616	13.6589	14.3311	10.5471	13.6752	13.5831	13.5553	10.1364	13.6441	13.6855	14.0526	10.2287	13.5364	13.5555	13.6879	9.92367	13.6428	14.5054	13.9559	10.7749	14.0985	-0.0774675	-0.217293	0.676038	0.0389216	0.111858	-0.0102601	-0.0181417	-0.0367067	0.137535	-0.34037	0.116403	0.198092	-0.113398	0.148224	-0.0711361	-0.140476	-0.0434333	-0.0283766	-0.4988	-0.0910697	0.00603694	-0.0903861	0.252409	0.0917951	0.040086
F9X0D1	13.7253	15.7008	14.2734	14.5969	13.9974	15.5225	14.8203	14.9878	14.0544	14.7022	14.7841	14.6206	14.6386	15.3975	14.8019	15.2066	14.5613	15.4872	15.303	15.2019	14.6866	15.5791	15.0454	15.09	0.0070557	0.0524714	-0.43972	-0.228635	-0.156479	-0.293936	-0.150573	0.0273906	-0.134454	-0.0982707	-0.0191456	-0.130113	0.232793	0.0180609	0.096402	0.281318	0.355407	0.295813	0.474869	0.219551	-0.419631	0.0577036	0.117293	-0.165172	-0.0497554
F9X0D2	12.2169	13.3375	NaN	13.1047	12.6649	13.3942	NaN	13.3512	12.6283	12.3025	NaN	13.0567	12.9769	12.934	NaN	13.3435	12.8774	12.834	NaN	13.4542	13.3421	13.1913	NaN	13.5806	-0.00847566	0.0883936	NaN	-0.0853638	0.00387407	-0.0229759	NaN	0.0263477	-0.0628171	NaN	0.0476118	-0.130475	0.0639163	-0.0461422	NaN	0.0536431	0.164379	0.0419545	NaN	0.107284	-0.271306	0.0692452	NaN	-0.0390944	0.0785697
F9X0E2	11.3555	10.3577	NaN	11.8724	11.6163	11.2395	NaN	11.9261	11.2439	9.81748	NaN	11.8974	11.6234	10.74	NaN	11.7722	11.3265	10.0986	NaN	11.8963	12.2817	10.3684	NaN	12.1928	0.339978	-0.329445	NaN	0.07134	0.165071	0.38435	NaN	-0.00979572	0.166793	NaN	-0.126912	-0.053539	-0.0796681	0.321888	NaN	-0.128704	-0.176675	-0.131542	NaN	-0.0616677	-0.121794	-0.191712	NaN	-0.0379654	0.144448
F9X0F6	10.7766	11.3616	13.1115	13.4314	10.756	11.103	13.2344	13.5436	10.6741	10.6131	13.3117	13.3794	11.2934	10.7857	13.0553	13.5324	11.1777	10.5704	13.2326	13.7061	11.5219	10.7469	13.1713	13.8624	0.302401	0.24796	0.0502586	-0.0193973	-0.153942	-0.178722	-0.0846406	-0.041967	-0.000879884	0.0812637	-0.155468	0.315541	0.131552	-0.0589413	0.00173405	-0.0181992	0.215796	-0.0861686	0.056338	0.0984418	-0.340338	-0.239669	-0.104954	-0.0179984	0.321045
F9X0F7	10.2206	13.0463	10.2758	NaN	10.363	13.5152	10.201	NaN	10.7415	12.807	9.76149	NaN	11.4221	13.3347	9.88982	NaN	11.4312	13.0217	9.15234	NaN	11.7113	13.3783	8.73715	NaN	-0.201919	-0.387724	0.731084	NaN	-0.495218	-0.0869037	0.398555	NaN	NaN	0.0475283	-0.0364492	0.189072	0.311916	0.169624	0.352752	NaN	0.520967	0.0446685	-0.50737	NaN	-0.0992965	0.071263	-1.02255	NaN	0.397341
F9X0G1	11.4112	13.9076	11.2447	12.6337	12.1418	13.9016	12.1749	12.7135	12.0173	12.7769	11.6142	12.5993	12.3394	13.6419	11.2178	12.814	11.838	13.4875	11.3168	12.7704	13.0868	13.6607	11.6595	13.1211	-0.168776	0.094777	-0.168426	-0.0164934	0.126047	-0.0793252	0.504064	-0.0716034	0.0195984	0.0318504	0.0818975	-0.21989	0.0718015	0.0980357	-0.187691	0.0640151	-0.229677	0.131605	-0.211254	-0.0367196	0.118707	-0.0252024	0.0314573	0.0412029	-0.106271
F9X0G2	NaN	12.2269	12.1146	11.4409	NaN	12.1448	11.7166	11.2375	NaN	11.9316	11.9729	10.9085	NaN	12.1609	11.5206	11.5865	NaN	12.3511	11.483	11.9716	NaN	12.2521	11.6634	11.0974	NaN	-0.201141	0.494312	0.192291	NaN	-0.451393	-0.161456	-0.14596	-0.269581	0.183363	NaN	0.319612	NaN	0.00183954	-0.0920535	0.238091	NaN	0.380075	-0.252298	0.566092	NaN	-0.0489928	-0.171868	-0.580934	0.429086
F9X0H5	12.4808	NaN	12.3294	12.2595	13.148	NaN	12.4437	12.1781	13.0711	NaN	12.4858	12.0562	13.3472	NaN	12.5892	12.0012	13.0258	NaN	12.8365	12.0756	14.3292	NaN	12.3402	12.3945	-0.193805	NaN	-0.0498489	0.223782	0.0376912	NaN	-0.193253	0.00747882	0.0909138	-0.0627118	0.0410789	NaN	-0.0150242	NaN	0.217555	-0.134315	-0.136519	NaN	0.342305	-0.116968	0.266578	NaN	-0.254046	-0.0708914	0.0128289
F9X0H6	11.9245	12.6152	12.464	13.6232	12.6066	12.8257	12.8881	13.6613	12.284	11.8996	12.89	13.4708	12.819	12.3472	12.6266	13.5607	12.424	12.1993	12.8871	13.6712	13.5727	12.5602	12.9366	14.0155	-0.121568	-0.0428578	-0.193163	0.0811862	0.124825	-0.000414819	-0.0267879	-0.0155154	-0.000717282	0.0636045	-0.117466	0.0576828	0.0853058	-0.0418602	-0.0229737	-0.0811098	-0.109715	-0.0016856	0.114908	-0.0276583	0.138617	0.0291355	0.0644121	0.0438145	-0.138095
F9X0L4	16.5045	17.2104	16.1373	17.4674	16.8308	17.3408	16.1925	17.3707	16.1997	16.2646	15.9714	16.9465	15.89	16.2922	14.8514	16.2297	14.7997	14.9628	13.901	15.3258	16.7138	16.0264	14.8728	16.5575	0.907138	0.610693	0.941146	0.942883	0.797763	0.573049	0.738564	0.711332	0.492502	0.606	0.246979	0.48104	-0.394985	-0.0385551	-0.337139	-0.394552	-1.28535	-1.17993	-1.41022	-1.35553	-0.27155	-0.446302	-0.538352	-0.396639	1.26368
F9X0L6	12.2895	12.7832	NaN	9.35264	12.8547	13.1607	NaN	9.15376	12.3266	11.8406	NaN	9.73513	12.8066	12.7171	NaN	9.44981	12.3348	12.0796	NaN	9.24522	13.5161	12.8653	NaN	10.0403	0.160554	-0.041347	NaN	-0.0183918	0.29	0.16805	NaN	-0.352115	0.434608	NaN	-0.157782	-0.167921	-0.00995384	0.161489	NaN	-0.0210132	-0.281876	-0.287966	NaN	-0.282669	-0.000942349	0.167695	NaN	0.239581	-0.101839
F9X0M3	12.4523	13.0918	10.5629	11.7618	12.7675	13.5183	10.962	12.2179	12.7624	12.6372	11.1657	12.1363	13.1789	13.1475	10.5104	12.1543	13.0374	12.8357	9.97327	12.4516	13.7583	13.2209	10.3683	12.2384	0.0185723	-0.233571	0.0973855	-0.273133	-0.101958	0.0248005	0.23873	0.0480937	0.171858	0.530934	-0.0267349	0.127923	0.057538	0.0910812	0.052464	0.0195543	0.116012	-0.0327209	-0.607271	0.259805	-0.0634297	0.0224867	-0.312241	-0.226177	0.0471539
F9X0P3	10.883	10.0984	11.6745	12.9745	11.3944	9.40918	11.9896	13.1529	11.2819	7.70929	11.8676	12.861	11.7334	8.21306	11.7857	13.1441	11.6587	8.02636	12.0523	13.2008	12.2082	9.51076	11.9022	13.2988	-0.0845048	1.02042	-0.0792148	-0.00573421	-0.00883967	0.163089	-0.0218914	0.0378249	-0.0486849	-0.0554375	-0.0410345	-0.552628	0.0782154	-0.595991	0.039599	0.0640226	0.203496	-0.594643	0.183523	0.0637098	-0.147332	0.559754	-0.0665785	-0.111138	0.154065
F9X0P4	13.4236	13.8253	13.3029	12.7676	13.9544	14.2843	13.8904	13.1703	13.7572	13.991	14.1651	13.4033	14.2291	14.742	13.7946	13.9109	14.2712	14.2638	13.9393	13.3665	14.1409	13.6356	13.2783	12.8236	0.0199775	-0.548571	-0.300609	-0.347634	0.114996	-0.257592	0.0290512	-0.0798134	0.358525	0.392344	-0.00185883	0.433251	0.137846	0.637179	0.198705	0.695873	0.379831	0.34696	0.220757	0.0943412	-0.650791	-0.611226	-0.540248	-0.721292	0.33668
F9X0Q9	9.66327	11.0935	10.4814	10.9496	10.469	11.0888	10.198	11.1668	10.2704	9.70306	9.9413	10.2882	10.0705	10.457	10.4068	10.6707	10.2884	9.88457	9.86026	10.7486	11.2437	10.6526	10.1472	11.4621	-0.111872	0.36347	0.433809	0.193705	0.258166	0.190627	-0.107407	0.27605	-0.397223	-0.275555	0.13989	-0.210935	-0.392232	-0.00414875	0.366876	-0.184949	0.0255811	-0.388506	-0.302336	-0.164148	0.0804673	0.0494939	-0.115387	0.276564	0.146993
F9X0R3	12.0558	13.3425	11.5022	14.9569	12.3635	13.3144	11.5507	15.1943	12.3607	12.7208	11.1756	14.8962	12.4412	13.1549	11.2175	15.0841	12.0685	12.8361	10.8947	15.1618	12.9715	13.3435	10.9351	15.5807	0.23805	-0.0263837	0.4145	-0.0636639	0.109957	-0.222515	0.205188	0.0389172	-0.053842	-0.0813888	0.187504	0.168057	-0.0642292	0.0550153	0.137358	-0.0362693	-0.236942	-0.0757591	-0.308007	-0.0155956	-0.23434	0.101586	-0.36765	0.130454	0.233113
F9X0S6	12.9601	14.3659	13.0597	14.131	13.3597	13.9359	13.7924	14.5861	13.3252	13.3611	13.7322	13.9156	13.4867	13.6819	13.381	14.4405	13.1874	14.2493	14.1831	14.4508	13.9291	14.2852	13.6254	15.0778	0.144502	0.13587	-0.444318	-0.177556	0.108404	-0.462222	0.0305577	0.142709	-0.322424	0.0588506	0.154162	-0.0528318	-0.0165262	-0.279184	-0.115429	0.0322245	-0.115952	0.476226	0.564028	-0.0145627	-0.27459	0.182141	-0.0936897	0.33961	-0.123743
F9X0U3	6.92493	10.5307	7.95303	9.69568	7.36501	9.7748	8.59775	9.30679	7.48696	7.55159	7.75475	8.79909	8.17802	8.81474	8.59257	9.73157	8.25328	8.83886	8.16063	9.03268	8.12954	9.7225	9.46422	9.71697	-0.238955	1.075	-0.342554	0.440326	-0.234595	0.151027	0.0443936	-0.0834022	-0.385761	-0.710098	-0.0323069	-1.08801	0.326522	-0.371991	0.304603	0.376428	0.601717	-0.15983	-0.249973	-0.379533	-0.422383	0.393803	0.953628	0.0319417	-0.00579208
F9X0U6	13.6461	14.2288	13.0946	13.6427	13.9295	14.6826	13.16	13.8762	13.9047	14.08	12.9971	13.7021	14.2562	14.5233	12.8368	13.7607	14.1186	13.9647	12.7119	13.8946	14.421	14.413	12.9289	14.1365	0.159143	-0.336734	0.264585	-0.0676415	0.00685144	-0.0510785	0.0722367	0.03102	0.0622003	-0.00212762	0.062387	0.330521	0.0816337	0.226725	0.0144693	-0.0494413	0.143974	-0.143845	-0.233058	0.0274001	-0.45399	-0.0255888	-0.116105	-0.00353748	0.154643
F9X0U8	12.4015	14.3928	13.5832	13.2419	12.5708	14.3867	13.7808	13.6764	12.4318	13.3194	13.7624	13.4991	13.0711	14.0585	13.4829	13.7334	12.9145	13.7493	13.56	13.7075	13.5433	14.0106	13.7779	13.9561	0.138391	0.156407	0.0502383	-0.268754	-0.128038	-0.0177908	-0.00988907	0.0309406	0.0589862	0.0601548	-0.186615	-0.100901	0.120375	0.0910801	-0.042408	0.12303	0.163725	-0.0300279	-0.088001	0.0399903	-0.107839	-0.0987675	0.029905	0.0158076	0.0592937
F9X0U9	14.4193	15.8644	15.6121	15.1824	14.4845	16.0037	15.5321	15.4161	14.1078	15.2164	15.3361	15.3335	14.6336	15.6488	15.2419	15.3692	14.0937	15.2185	15.1354	15.7921	15.4146	15.63	15.5075	15.7053	0.452788	0.0172929	0.342835	-0.158893	0.0822755	-0.0115008	0.0050507	-0.0600612	0.0626843	-0.102469	-0.214101	0.185397	-0.020504	0.0706052	-0.0197273	-0.0719294	-0.360526	-0.17164	-0.248882	0.293869	0.0600683	-0.0901543	0.0231926	-0.0656689	0.181646
F9X0V1	13.06	13.1876	12.7405	13.125	13.6013	13.6994	13.4479	13.3526	13.4002	13.1759	13.4754	13.2361	13.8044	13.8952	13.3848	13.8529	13.8496	13.5686	13.6199	13.7394	13.2591	13.0833	12.9412	13.3201	0.123255	-0.497521	-0.402894	-0.187598	0.228891	-0.153878	0.0467333	-0.0948035	-0.00596504	0.162738	0.108139	0.306846	0.180127	0.479006	0.249054	0.440569	0.425226	0.340405	0.361512	0.269941	-1.06564	-0.474858	-0.417142	-0.422143	0.353756
F9X0V3	13.1633	13.8056	10.8254	11.1044	14.0069	15.0387	10.6849	11.5849	13.5907	14.501	10.6007	11.9035	13.8958	14.6969	10.7822	11.2708	13.5454	14.0125	10.4632	11.6272	14.6223	14.3133	10.6313	12.248	-0.0817129	-0.839182	0.285647	-0.393622	0.32622	0.225756	-0.11256	-0.047995	0.476025	-0.108226	-0.00967339	0.672231	-0.0368459	0.320996	0.25009	-0.326995	-0.187231	-0.175281	-0.191505	-0.0276681	-0.0107569	-0.204519	-0.123447	0.320255	-0.2526
F9X0V7	14.3372	15.4596	13.2459	12.5804	14.7756	16.5217	13.3527	13.0768	14.7041	15.9197	13.3734	12.8206	15.1145	16.2804	13.1493	12.8984	14.5806	15.4691	12.9798	12.7767	16.4763	15.9752	13.376	13.371	-0.101768	-0.728167	0.124613	-0.21514	-0.0991323	0.165851	-0.0263222	0.14647	0.0955642	0.0828624	-0.0902829	0.548023	-0.0121068	0.361579	0.0356728	0.00310107	-0.346037	-0.261714	-0.25653	-0.175739	0.649327	-0.0855723	0.0397037	0.145743	-0.417416
F9X0X0	10.9974	13.4975	12.1972	14.2689	10.4875	12.5524	12.5897	14.2389	10.3119	12.7146	11.9292	13.919	10.6567	12.884	11.8155	13.6945	10.3401	13.6003	12.5713	13.5886	10.4263	13.874	12.3528	14.1922	1.01982	0.060196	0.0795151	0.410324	0.0742521	-1.05293	0.214168	0.245504	0.130971	-0.357777	-0.0210817	0.0933747	-0.00848312	-0.28436	-0.294569	-0.263909	-0.125172	0.619987	0.338557	-0.426845	-0.93934	0.563736	0.020106	-0.096046	0.505351
F9X0X2	13.0784	11.64	10.9399	12.5472	13.3472	11.77	10.6861	12.6828	13.3648	10.8765	10.9461	12.5268	13.7046	11.5892	10.3305	12.6653	13.4648	11.2323	10.4021	12.6932	14.1386	11.3976	10.8264	13.086	0.121034	-0.0277813	0.376349	-0.0278852	-0.0458297	-0.0658752	-0.135309	-0.0271146	0.0221579	0.213239	0.0521253	0.0248515	0.0596256	0.190389	-0.225508	-0.00963922	0.0198068	0.0215524	-0.276558	-0.0387272	-0.206762	-0.143136	0.0477871	0.0812084	0.165655
F9X0X6	11.3791	12.7724	11.6967	7.79273	12.0223	13.5386	12.2724	7.95425	11.601	12.0539	11.9756	8.07612	13.0064	13.3658	11.9061	7.50192	12.7135	13.2172	11.9462	7.81628	13.9821	13.268	11.8583	8.65141	-0.512622	-0.513713	-0.120945	-0.047616	-0.30506	0.0843396	0.196985	-0.0209255	0.306285	-0.0113121	-0.646024	-0.416116	0.42713	0.348606	0.0960764	-0.438215	0.334185	0.388031	0.0135544	-0.180919	0.702391	0.108853	-0.174359	0.381391	-0.553293
F9X0Y2	16.4741	17.7106	16.9235	17.5527	16.9639	17.765	17.1198	17.8526	16.9174	16.5705	17.0698	17.5471	17.1878	17.2435	16.8612	17.6347	16.9152	17.0707	16.8651	17.6475	17.9623	17.6028	17.1566	18.059	-0.0369166	0.133215	0.0490486	-0.0377899	0.0170972	0.019584	-0.0124006	0.127311	0.0270761	0.0261224	0.0509921	-0.190768	-0.0109027	-0.0648845	-0.00559098	-0.0556128	-0.0835251	-0.0495798	-0.124353	-0.0998338	0.0632552	0.152434	0.0671732	0.0388492	-0.0535386
F9X0Y4	14.1794	15.4448	13.663	14.444	14.5338	15.7344	13.7821	14.4119	14.5043	14.7292	13.7808	14.1766	14.8255	15.152	13.6263	14.0632	14.5398	14.9345	13.6994	14.0799	15.8426	15.2925	13.8831	14.6175	0.000889719	-0.0199255	0.0487947	0.270226	-0.080439	0.101538	-0.0899049	0.103316	0.0733931	-0.00262528	-0.0295917	0.0805922	-0.0405793	-0.0437378	0.0196927	-0.210318	-0.126388	-0.0732196	-0.0298656	-0.25071	0.276109	-0.0452471	0.0539084	0.0140936	0.000280326
F9X0Y8	6.70072	9.97126	8.92517	8.56449	NaN	10.1066	8.75616	8.26228	6.91337	9.08239	8.4434	8.801	NaN	9.90037	8.52966	8.79545	NaN	9.11275	8.71812	9.79576	6.95989	10.0719	8.43596	9.68489	NaN	0.0135619	0.41533	-0.294378	NaN	-0.0192133	-0.0114576	-0.731426	0.012633	-0.235705	NaN	-0.0592163	NaN	0.211635	0.0274461	-0.163206	NaN	-0.387936	0.093269	0.780036	NaN	0.241168	-0.288882	0.396341	-0.0713709
F9X0Z0	NaN	11.0879	10.3677	12.9436	NaN	11.2441	10.6246	13.0558	NaN	10.6391	9.91317	13.1714	NaN	10.728	9.92558	13.2652	NaN	10.5402	10.1997	13.3178	NaN	10.8943	10.1768	13.6604	NaN	-0.0178419	0.291385	-0.167008	NaN	-0.0297241	0.290481	-0.18965	0.131301	-0.332449	NaN	0.34939	NaN	-0.108802	-0.143153	0.0547845	NaN	-0.108537	0.00830185	0.0503938	NaN	-0.0844843	-0.114565	0.120179	0.0618021
F9X0Z8	12.824	13.7985	12.6788	NaN	13.3608	14.2558	12.6713	NaN	13.234	13.6089	12.6279	NaN	13.6935	14.1281	12.4225	NaN	13.6388	14.1982	12.6266	NaN	13.7461	14.0218	12.45	NaN	-0.0331623	-0.453576	0.224146	NaN	0.0680021	-0.164288	-0.0411294	NaN	NaN	0.00402453	0.021506	0.17299	0.148752	0.144989	-0.0244502	NaN	0.293971	0.403174	0.0570225	NaN	-0.499069	-0.103289	-0.219613	NaN	0.186459
F9X100	14.0131	15.1423	14.0699	14.1576	14.333	15.5858	14.1003	14.0775	14.1841	14.7828	13.914	13.8568	14.7265	15.175	13.8821	14.032	14.2915	14.7702	13.7875	14.212	15.4374	15.0632	14.011	14.2831	0.0745395	-0.194376	0.233998	0.179533	-0.0412245	0.0809799	0.0066071	-0.0354074	-0.0507311	-0.0911251	-0.109797	0.262211	0.100354	0.107242	0.0538191	-0.0458833	-0.13474	-0.109517	-0.163389	0.0771302	0.110869	-0.14654	-0.0399101	-0.124641	0.123479
F9X107	11.1042	13.6275	10.1852	11.7523	11.3814	13.8047	9.65876	12.0647	11.3889	13.1451	9.55163	11.3874	11.6837	13.6713	9.6243	11.8294	11.5454	13.5027	9.48551	11.9363	11.7487	13.881	9.84257	12.2883	0.187896	-0.228024	0.585483	0.00101893	0.0294065	-0.218903	-0.198774	0.178585	-0.293388	-0.217399	0.117193	0.105588	0.0797346	0.0847234	0.032158	-0.0216659	0.141461	0.104157	-0.229271	0.0281293	-0.555692	0.152459	0.0278014	0.107321	0.203621
F9X108	7.33047	11.4643	12.7926	13.2436	8.41638	11.1366	12.741	13.2634	7.539	9.74618	12.9636	13.0514	8.41435	10.3921	12.5819	13.181	9.17235	10.6036	13.1621	13.3608	9.61003	11.2804	13.1087	13.7023	-0.524224	0.4436	0.0258792	0.0682485	0.125963	-0.0521658	-0.283499	-0.046735	-0.0533593	0.0275512	-0.671065	-0.458423	-0.127955	-0.359626	-0.177198	-0.0941219	0.829983	0.0399424	0.280315	0.028677	0.367298	0.386672	0.126951	0.0972907	-0.241177
F9X109	6.42864	9.5403	8.47196	10.7639	7.30451	9.5763	8.7999	10.0251	8.54967	8.4797	9.15416	10.4145	8.65735	9.5623	8.29264	9.38265	8.01123	8.09476	9.05899	9.3656	10.4961	10.0968	6.86009	11.2179	-1.25353	0.0651056	0.157242	0.694047	-0.813382	-0.0669824	0.227405	-0.179528	0.415151	0.670176	0.512119	-0.179408	0.287571	0.356064	-0.0144543	-0.786974	-0.158623	-0.923426	0.629261	-0.861086	1.42584	0.748647	-1.66963	0.718391	-0.390097
F9X119	7.89002	7.73112	8.65442	NaN	9.65607	10.8305	9.00773	NaN	9.75534	8.32737	9.46544	NaN	9.53735	9.64584	8.32278	NaN	9.18351	9.38619	8.74665	NaN	11.2315	9.90366	9.71069	NaN	-1.09321	-1.82316	-0.205291	NaN	0.237115	1.10816	-0.109758	NaN	NaN	0.436466	0.41673	-0.410814	-0.133487	0.360524	-0.529308	NaN	-0.287398	0.288916	-0.228077	NaN	0.860252	0.476377	0.635969	NaN	-1.69809
F9X121	14.6381	15.3215	13.7952	14.5448	14.9372	15.7299	13.6136	14.476	14.9112	14.8563	13.6302	14.3437	15.2117	15.2391	13.4637	14.432	14.9447	14.9661	13.6436	14.6396	15.7171	15.4064	13.8326	14.9754	0.137167	-0.181869	0.256998	0.101363	0.000586912	0.0584033	-0.182445	-0.102333	-0.029303	-0.0773417	0.0548513	0.168994	0.0231975	0.0047004	-0.066958	-0.111252	-0.0438955	-0.0802232	-0.00961228	0.0392846	-0.171907	0.0299942	0.0793583	0.102241	0.0684931
F9X136	12.5095	9.44646	10.7283	NaN	12.621	9.79445	11.2169	NaN	12.8139	8.2318	11.1585	NaN	13.3333	9.44143	11.028	NaN	12.8652	9.67918	10.6304	NaN	13.9678	9.90497	11.2378	NaN	0.050146	-0.22008	-0.146747	NaN	-0.274056	-0.0401756	0.0839998	NaN	NaN	0.114125	-0.000896573	-0.618657	0.186305	0.0438473	0.160571	NaN	-0.0818468	0.469645	-0.359657	NaN	0.120349	0.36542	0.147709	NaN	-0.31672
F9X138	6.35996	9.41466	8.44456	NaN	8.5575	9.95641	8.511	NaN	7.14149	7.69572	8.93705	NaN	8.90656	9.01706	7.71088	NaN	8.79727	8.80819	9.94989	NaN	9.74499	9.41293	9.14578	NaN	-1.33227	0.113674	-0.213726	NaN	0.429557	0.487334	-0.405058	NaN	NaN	0.109499	-0.906108	-0.789185	0.526725	-0.0149695	-0.93979	NaN	0.61737	-0.035791	1.17659	NaN	0.664723	0.238937	0.272489	NaN	-0.869489
F9X143	13.8589	12.3097	12.1114	13.099	13.9316	12.1527	12.1043	13.4517	13.8024	12.3883	11.6599	13.2592	14.0408	12.5749	12.1619	13.316	13.9354	12.5929	11.9373	13.5389	14.0824	12.4781	11.7313	13.6617	0.476011	-0.356571	0.28527	-0.163618	0.113005	-0.681629	0.0204683	0.05425	0.0670235	-0.335497	0.0641957	0.538127	-0.0296501	0.177634	0.343382	-0.0464291	0.06492	0.383655	-0.00384399	0.119422	-0.688482	-0.0612162	-0.309779	-0.0306481	0.332805
F9X145	NaN	8.91624	10.5437	11.0959	NaN	9.28355	11.2146	11.0812	NaN	9.06016	11.0719	11.1572	NaN	9.47729	10.249	10.9024	NaN	7.83712	9.40442	10.6763	NaN	7.55059	9.45904	10.77	NaN	-0.0214166	0.344839	0.273816	NaN	0.177815	0.757917	0.124268	0.405684	0.703796	NaN	0.938591	NaN	0.8086	0.0577451	-0.0194589	NaN	-0.643524	-0.909465	-0.302591	NaN	-1.26006	-0.954832	-0.481718	1.09795
F9X152	NaN	12.5923	10.6392	8.61062	9.11095	12.421	10.5627	8.32975	7.92932	11.5839	10.3485	7.904	8.32522	11.9661	10.2875	9.18906	7.35676	11.9217	10.9101	9.31359	10.2781	12.3225	10.5836	9.81142	NaN	0.207576	0.208869	-0.124011	NaN	-0.13181	-0.125436	-0.539718	-0.760122	-0.251139	NaN	0.0152304	NaN	-0.149636	-0.135279	0.354637	NaN	-0.00607981	0.364724	0.422098	NaN	0.0647193	-0.0617388	0.647115	-0.119221
F9X155	12.7551	13.3824	12.5411	11.8602	13.3509	13.7563	12.6393	12.4175	13.2084	13.252	12.8321	11.8277	13.6657	13.6662	12.8595	12.0838	13.4675	13.3684	12.7246	11.981	13.568	13.2843	12.6204	12.2606	-0.0217248	-0.319396	-0.0368301	-0.0864982	0.138357	-0.113484	-0.196383	0.335925	-0.0485258	0.0848866	0.0761775	0.36631	0.201197	0.233435	0.28915	0.0373615	0.202938	0.123627	0.0316586	-0.122518	-0.596944	-0.290492	-0.172483	-0.115745	0.177804
F9X156	14.9527	15.5048	14.5947	15.3291	15.4605	15.7213	14.7583	15.5245	15.4452	14.4206	14.756	15.2725	15.6395	15.1505	14.5687	15.3186	15.4948	14.9564	14.6291	15.3652	16.2743	15.3356	14.7742	15.7978	-0.0326836	0.0730989	0.0394228	0.0196111	0.0393118	0.121541	-0.0546983	0.0801533	0.0335071	0.031518	0.104375	-0.195048	-0.0335242	-0.0122273	0.0210372	-0.0906972	0.0216591	-0.0183069	-0.0411926	-0.101216	-0.0991377	0.0309421	0.00391279	0.0586421	0.0262725
F9X159	14.0422	15.8953	13.9845	14.6192	14.3173	16.0341	14.0198	14.7814	14.204	15.1817	14.1529	14.7605	14.671	15.7954	13.9012	14.8675	14.4036	15.45	13.4324	15.0317	15.3177	15.7768	14.2059	15.4096	0.108626	-0.0437483	0.159961	-0.167345	-0.0519942	-0.0730551	-0.0625559	-0.139961	0.0444325	0.159107	-0.0849634	0.0587606	0.0498323	0.125329	0.084318	-0.0188044	-0.0176125	-0.032038	-0.507149	0.0882666	-0.00388795	-0.0352478	0.166318	0.193412	-0.0657752
F9X169	11.4071	12.1815	NaN	9.36459	11.7776	12.0894	NaN	9.62238	11.6002	11.3957	NaN	9.62959	11.8501	11.8532	NaN	9.34596	11.6615	11.7899	NaN	8.45796	12.2915	12.0109	NaN	9.54716	0.201445	0.0445219	NaN	0.161763	0.136297	-0.215639	NaN	0.284711	0.497268	NaN	0.0392518	0.0748959	-0.0430716	-0.014749	NaN	0.0433369	-0.0318202	0.109966	NaN	-0.901734	-0.302102	0.0010042	NaN	-0.0853446	0.264724
F9X174	10.9537	12.5476	8.10858	12.9905	11.5387	12.6515	9.68287	12.9991	11.8628	11.6546	8.54044	12.9721	12.1868	12.2515	7.96399	13.0708	11.709	12.2873	8.28545	13.0364	13.0253	12.3866	7.9663	13.1363	-0.366634	0.000921637	-0.191122	0.0814057	-0.217319	-0.0632305	1.1254	-0.0448083	0.133536	0.0714732	0.187094	-0.0759909	0.178864	-0.0262285	-0.328085	0.0619129	-0.0989584	0.197586	-0.129264	-0.0295664	0.316954	-0.0330574	-0.5484	-0.20248	-0.0021111
F9X183	8.36597	10.0705	9.99294	11.8127	8.92136	9.24833	9.6706	11.7136	8.87421	7.87725	9.73787	11.5619	9.3127	8.12768	9.8677	11.6274	9.44781	9.36374	9.47253	11.6853	10.3992	9.12275	10.5427	12.0538	-0.295163	0.851981	0.237114	0.195351	-0.175489	-0.138293	-0.342995	-0.0385854	0.0150196	-0.187216	-0.142298	-0.5252	-0.036043	-0.821897	0.119492	-0.0896964	0.298994	0.602205	-0.398309	-0.0888876	0.349999	0.031205	0.571913	0.00679892	0.00734182
F9X192	10.9665	10.2766	9.4747	NaN	11.2783	10.09	8.77781	NaN	11.3593	9.66197	9.9408	NaN	11.4328	9.85281	9.34196	NaN	11.4354	10.0759	10.0315	NaN	12.0384	9.96527	10.2515	NaN	0.107127	0.0393442	-0.0367689	NaN	-0.0168216	-0.315347	-0.991429	NaN	NaN	0.260063	0.144501	0.240818	-0.114184	-0.115474	-0.161885	NaN	0.0883542	0.295641	0.405012	NaN	-0.208976	-0.144983	0.525008	NaN	-0.0204491
F9X198	10.8728	13.2113	7.17433	9.19002	11.354	13.4542	7.47224	9.73953	11.4392	12.2661	7.63916	8.85281	11.8482	12.9495	7.41363	8.85708	11.1548	12.7047	6.97888	8.23821	12.8765	13.0253	7.73789	10.5645	-0.159073	0.025939	-0.103456	0.0747688	-0.113571	0.100733	-0.0633122	0.489435	-0.191938	0.192112	0.051954	-0.103125	0.128758	0.0331402	0.143466	-0.357966	-0.364684	-0.0236242	-0.413914	-1.0339	0.456616	-0.0330634	0.245103	1.0196	-0.462519
F9X199	11.8412	11.6002	7.54913	11.6329	11.6909	11.7104	7.57304	11.9665	11.8578	11.2807	7.51735	11.7049	12.1539	11.857	7.93446	11.8822	11.6312	11.4657	7.74806	11.974	12.3355	11.8846	8.04827	12.4176	0.481833	-0.283029	-0.0543489	-0.171704	-0.104186	-0.34093	-0.288212	0.0270679	-0.029116	-0.25539	0.143071	0.213477	0.106921	0.242664	0.338599	-0.0221691	-0.215793	0.0394589	0.0295665	0.012599	-0.411845	0.128359	0.229786	0.183322	-0.0392174
F9X1A5	8.58335	12.0782	NaN	11.7588	9.90662	12.9926	NaN	11.7422	9.89154	12.027	NaN	11.8449	9.60827	12.5141	NaN	11.5852	10.6702	12.4925	9.24151	12.2082	10.6081	12.2326	NaN	12.042	-0.735595	-0.561452	NaN	0.0203874	0.15196	0.184886	NaN	-0.131117	0.176986	NaN	0.217223	0.203462	-0.398277	0.143413	NaN	-0.253008	0.863596	0.309792	NaN	0.312855	-0.0989076	-0.280101	NaN	-0.126104	-0.257182
F9X1A8	12.827	14.6374	11.83	14.1042	13.0178	14.6467	11.6325	14.2824	13.0606	13.6382	12.1227	13.9699	13.3117	14.0746	11.5364	14.2269	13.3159	14.0777	12.2906	14.3667	13.989	14.3375	12.1234	14.4081	0.13239	0.151862	0.0323151	0.00291928	-0.1125	-0.00690857	-0.423009	0.0463287	-0.0608377	0.155716	0.0106359	-0.0311998	-0.0704764	-0.141978	-0.253672	0.025803	0.133564	0.0492424	0.377897	0.108604	-0.0936133	-0.0210184	0.110753	-0.122817	0.111546
F9X1D3	11.491	11.4607	11.1237	10.5484	11.8733	11.3545	11.275	10.4881	11.6545	10.7467	11.2994	10.5515	11.5555	10.7394	11.1897	10.3265	11.5188	11.0774	11.1032	10.7184	12.4673	11.351	11.3485	11.1822	0.289974	0.0888787	0.0253366	0.0376786	0.236556	-0.185339	-0.081146	-0.157456	0.111265	0.0318389	0.0981481	0.190989	-0.333134	-0.363378	0.0989891	-0.284007	-0.169854	0.162641	-0.110189	0.0507462	-0.121689	0.106209	0.0351699	0.241773	0.0451014
F9X1D8	11.2911	13.9032	12.8676	14.0267	11.5578	13.7937	12.928	13.9566	11.7223	12.6581	13.1291	13.8752	12.0158	13.1872	12.8101	14.0045	11.6969	12.9911	13.1712	14.1555	12.7501	13.4327	13.1004	14.4289	0.0111713	0.325401	-0.00859915	0.0772412	-0.157813	0.0478012	-0.205905	-0.127737	-0.0037754	0.0836729	0.0869349	-0.103656	0.0482821	-0.12171	-0.058457	-0.0447621	-0.0707384	-0.129684	0.180028	0.0492168	0.0821635	-0.0181523	0.00926036	0.0498163	0.0705316
F9X1E6	13.95	15.9025	15.6569	14.623	14.4942	16.1302	15.8967	14.887	14.4421	15.1617	15.8025	14.6893	14.75	15.6802	15.6458	14.834	14.5742	15.6104	15.6278	14.7485	16.0164	15.9144	15.9745	15.2541	-0.195397	-0.0809307	0.0144175	-0.0911945	-0.0869572	-0.0212539	-0.00356892	0.0379254	0.0455757	-0.00920579	-0.0586814	-0.00562811	-0.0829891	-0.0341901	0.0109655	0.0200166	-0.0589041	0.083997	-0.129648	-0.122569	0.482929	0.0580058	0.11704	0.110246	-0.280331
F9X1E9	17.298	18.5838	17.6292	18.5658	17.6171	18.3547	17.9128	18.6408	17.5646	17.2251	17.7357	18.2935	17.994	17.7993	17.5608	18.5314	17.787	17.7537	17.9042	18.5714	18.7256	18.1579	17.9069	18.8047	0.0259747	0.35459	-0.0208198	0.123034	-0.0906467	-0.0426254	0.0050132	0.0631019	-0.0788336	-0.0835962	-0.0627752	-0.188103	0.0344333	-0.160982	-0.0816182	-0.0112215	0.0273914	-0.0185561	0.139155	-0.0282952	0.0656225	0.0556763	0.0418662	-0.0677852	0.0968496
F9X1G0;REV__F9XLT0	12.4057	13.0873	10.7112	11.9213	12.9057	13.3818	9.21515	11.7311	12.8023	12.0901	10.0651	11.8156	12.855	12.98	9.52972	11.9046	12.8005	12.6709	10.2815	11.8665	13.7412	13.1572	10.2557	12.1512	0.0464026	-0.0573984	0.826329	0.148011	0.110626	0.068986	-0.927451	-0.177046	0.112858	0.0110592	0.0876346	-0.238511	-0.191948	0.10423	-0.347478	0.0315347	-0.0465058	-0.0167947	0.281631	-0.0635848	-0.00620997	0.139488	0.15591	-0.0517738	0.181483
F9X1G9	7.12454	10.2392	9.94263	10.3474	8.57524	10.3273	10.1176	10.2798	7.33137	9.27027	10.2472	10.1292	9.91067	9.90385	9.4502	10.4226	9.33309	9.62865	10.3458	10.5871	10.5641	9.78807	10.3842	10.4367	-1.1229	0.129511	-0.0137593	0.105373	-0.107921	0.0495167	-0.0965221	-0.0970231	-0.0423661	0.121559	-1.27145	-0.0233681	0.975626	0.0630831	-0.49857	0.0807726	0.597973	-0.0240769	0.274445	0.188236	0.928675	-0.194666	0.212848	-0.234993	-0.40341
F9X1I1	7.21014	11.2929	9.90227	12.5188	6.31701	11.1412	10.1511	12.554	7.88935	9.42478	10.4955	12.2063	7.57788	10.282	9.51631	12.4204	6.47371	10.3439	10.6049	12.6235	8.79015	10.6663	10.215	12.7989	0.392832	0.517552	-0.120349	0.123596	-0.936008	0.197787	-0.12925	0.0239938	-0.118447	0.303571	0.716672	-0.534481	0.0729687	-0.224338	-0.498688	-0.0745883	-0.831275	0.0255137	0.467292	0.0714307	0.584812	0.0179656	-0.0225758	-0.0259855	0.0898537
F9X1I2	17.6706	18.5742	17.2818	18.6441	17.881	18.1998	17.3946	18.3955	17.1087	17.0249	16.9663	17.7414	16.6294	16.9598	15.8586	16.9792	15.6847	15.779	15.1321	16.111	17.6886	16.8179	15.9564	17.4635	1.11916	1.09813	0.975088	1.21343	0.893857	0.555614	0.830037	0.829973	0.381263	0.490331	0.201901	0.364856	-0.609626	-0.247332	-0.440495	-0.551216	-1.35441	-1.24008	-1.28963	-1.47658	-0.250876	-0.531187	-0.565335	-0.396873	1.53752
F9X1I5	15.8132	16.5034	15.651	16.6335	16.2322	16.7317	15.8067	16.7564	16.142	15.7991	15.7782	16.4727	16.4893	16.2557	15.5863	16.7098	16.2274	16.083	15.8718	16.8711	17.1428	16.3086	16.0471	17.0826	0.0310827	-0.0270028	-0.0142745	0.00427795	0.0143673	0.0332252	-0.116347	-0.00767061	-0.0860761	-0.0563837	0.0045381	0.084734	0.0196182	-0.00575489	-0.0713373	-0.0192384	-0.042302	0.00963944	0.0915211	0.0849953	-0.0273043	-0.094841	0.166822	0.0237119	-0.0185762
F9X1J1	14.1621	15.709	14.6944	15.6629	14.6867	15.7555	14.8042	15.6939	14.525	14.5374	14.8551	15.4956	14.9353	15.084	14.5786	15.6366	14.5841	14.8816	14.7515	15.7058	16.0089	15.4939	15.0794	16.11	-0.0958696	0.215295	0.0254036	0.0705234	-0.00694648	0.0937233	-0.122548	-0.0333108	-0.0262594	0.0168923	-0.0882917	-0.140246	-0.0102988	-0.140754	-0.0827256	-0.0555063	-0.161542	-0.155137	-0.0324237	-0.0434033	0.362949	0.127118	0.195401	0.0879564	-0.139518
F9X1J2	12.2429	10.248	9.89183	10.5725	12.3587	9.67781	10.5321	10.7447	12.4311	8.69742	9.99704	11.1293	13.4695	8.9077	10.3674	11.3383	13.234	10.3839	9.65744	11.3552	13.1189	9.82155	10.4459	11.5562	-0.00720042	0.375143	-0.131887	-0.418397	-0.327122	-0.363177	0.250573	-0.381081	0.208881	-0.195944	-0.174407	-0.359395	0.531769	-0.696241	0.351319	0.247591	0.496226	0.968024	-0.481286	0.20742	-0.519265	0.0756448	0.207225	0.135585	-0.0203827
F9X1K3	15.2833	16.7964	15.6338	16.444	15.6947	16.73	16.104	16.6843	15.6439	15.6442	16.0488	16.3712	15.974	16.2636	15.9744	16.6509	15.9832	16.2982	16.1968	16.8068	16.3559	16.5613	16.0541	16.8095	0.0198537	0.163947	-0.243298	-0.0586792	-0.00442242	-0.0705368	-0.0308163	0.0467848	-0.0609537	0.00249579	0.0250645	-0.172163	0.022987	-0.0998867	0.104902	0.048433	0.232102	0.1228	0.204712	0.147235	-0.295585	0.0558392	-0.0379964	-0.12282	0.0705964
F9X1L0	12.9845	13.3327	14.6101	14.6427	13.4844	12.8303	15.0038	14.9155	13.4773	11.6178	14.8588	14.596	13.9468	12.3329	14.7007	14.8161	13.6516	12.4881	14.9353	14.9737	14.673	12.8363	15.025	14.9796	-0.159411	0.509553	-0.12061	-0.0528039	-0.0951388	-0.160967	0.0152948	0.0851441	-0.0290136	-0.0412197	-0.0219898	-0.389259	0.11534	-0.221346	-0.0223817	0.0208162	0.0200697	0.121915	0.0896239	0.121408	0.14113	0.140102	0.0792931	-0.145551	-0.00956182
F9X1L7	17.359	18.3653	17.649	18.1629	17.7001	18.7617	17.7318	18.254	17.6691	17.9894	17.6008	18.1841	17.9316	18.348	17.4166	18.1423	17.6152	18.0071	17.2352	18.154	18.8621	18.389	17.6113	18.7312	0.0618561	-0.194901	0.233107	0.0165969	-0.0327373	0.033372	0.0581939	-0.0271872	0.10833	0.015666	0.0166528	0.245221	-0.0530889	0.0566973	0.00832282	-0.10379	-0.169597	-0.0961728	-0.295703	-0.149186	0.176915	-0.0442163	-0.0195867	0.155236	-0.0379222
F9X1N2	13.8863	14.8795	13.7417	14.8429	13.9276	14.8448	14.0448	14.9078	13.809	13.8717	13.9341	14.682	14.1247	14.2961	13.6397	14.8427	14.0183	14.3109	13.9391	14.8081	14.8447	14.7474	14.1441	15.1478	0.343596	0.137607	-0.0406593	0.0961216	-0.0507986	-0.0652076	0.00470977	0.0262211	0.00568934	-0.017543	-0.0890855	-0.0540794	-0.105595	-0.176864	-0.135037	-0.00381752	-0.0120634	0.0260223	0.0417703	-0.0955686	-0.086053	0.132522	0.146759	-0.0286458	0.0930206
F9X1P8	10.3923	10.5221	9.92742	11.4272	11.5	11.3967	10.1814	11.6284	11.5705	10.6717	10.5181	12.3846	12.12	11.4239	10.0199	11.9205	11.7068	10.9286	10.187	11.85	11.7358	10.9041	9.47068	11.9766	-0.552838	-0.702583	0.00159309	-0.312236	0.119121	0.00390247	-0.00220357	-0.245884	0.715683	0.422968	0.269941	0.263133	0.487279	0.468191	0.10166	0.0812661	0.273922	0.160925	0.146138	-0.0462716	-0.597425	-0.193568	-0.670155	-0.192558	0.0219106
F9X1Q8	10.3163	11.2358	11.025	10.4236	10.639	11.6976	10.6882	10.7229	10.8644	10.8234	10.9554	10.9996	10.8753	11.4	10.694	10.8444	10.5454	10.4656	9.24275	11.1077	11.9723	11.372	10.8761	11.6027	0.0065757	-0.180134	0.569685	-0.401407	-0.106446	0.113629	-0.0249279	-0.236994	0.245106	0.330778	0.199336	0.223627	-0.122026	0.253077	0.246314	-0.0804473	-0.252032	-0.493336	-1.32758	0.125769	0.274591	0.0831367	0.205736	0.347973	-0.229179
F9X1S2	13.2442	14.937	12.6116	13.7796	13.5861	14.8947	13.0053	13.8342	13.5915	13.9582	12.7962	13.597	13.8626	14.2933	12.7261	13.8438	13.7291	14.2575	12.9785	13.7994	14.4077	14.8208	12.8735	14.2913	0.066407	0.159891	-0.0953241	0.0471736	-0.027391	-0.0504757	0.0405106	-0.0331067	-0.0649318	-0.0800355	0.0583379	-0.00279027	-0.00277966	-0.214853	0.0267389	0.0115885	0.0636046	-0.0625278	0.156547	-0.0899178	-0.158179	0.170756	-0.0484366	0.129194	0.0212032
F9X1S6	13.2036	15.3292	12.2813	12.62	13.6327	15.358	12.3876	12.8522	13.6623	14.1988	12.3007	12.7276	14.0631	14.8612	12.1554	12.9311	13.939	14.8744	12.0449	12.9268	14.8495	15.1189	12.6254	13.2508	-0.129008	0.122255	0.107026	-0.139661	-0.135712	-0.0169933	-0.04451	-0.0423092	0.0384574	-0.0428942	-0.0256888	-0.191993	0.0428858	-0.0767168	-0.0113198	0.0717238	0.118704	0.124501	-0.244437	0.0103091	0.128819	0.0389471	0.236135	0.06148	-0.126192
F9X1S7	14.7877	16.4968	15.5847	17.0327	15.3991	16.1452	15.9461	17.1375	15.3165	14.8498	15.7343	16.8281	15.6886	15.4042	15.7192	17.0468	15.5593	15.4153	15.8429	17.0239	16.5548	15.9506	16.0274	17.4284	-0.204208	0.536312	-0.0994781	0.0749417	-0.028548	0.0166149	0.00410418	0.044881	-0.0591745	-0.119158	-0.0308241	-0.294545	0.00903524	-0.287342	0.0425901	-0.010821	0.0797339	-0.08816	0.0437205	-0.0907665	0.174811	0.11712	0.128221	0.0409393	-0.0383807
F9X1T0	11.7424	12.8853	10.6347	13.4931	12.64	12.6021	11.391	13.5338	12.535	11.1134	11.3005	13.129	12.8021	11.9283	11.2397	13.4255	12.6112	11.5562	11.4221	13.4858	13.8893	12.3156	11.441	13.7872	-0.401837	0.568351	-0.478552	0.142475	0.0600267	0.117031	0.0199811	0.0483469	-0.151099	0.0179281	0.0353345	-0.387542	-0.0298105	-0.119726	0.134065	-0.0249436	-0.0207172	-0.303758	0.193831	-0.0216592	0.357004	0.125645	0.112747	0.00688013	-0.19296
F9X1T1	11.8975	13.4883	12.6182	13.4769	11.9876	13.3983	13.1012	13.6909	11.9314	12.4891	13.0991	13.2219	12.6544	12.82	12.7934	13.7187	12.4533	12.7671	13.2224	13.7642	13.2591	13.0443	13.2583	13.8785	0.0926901	0.236992	-0.272331	-0.0232182	-0.252949	-0.0210892	-0.0470808	0.0559415	-0.20765	0.0392928	-0.228789	0.0538837	0.161944	-0.16243	-0.0895304	0.118865	0.160831	-0.0272771	0.216864	0.107301	0.066274	-0.0800789	0.152786	-0.0512392	-0.0134023
F9X1T5	8.50716	10.5681	9.44886	11.652	9.84814	10.7042	9.77597	11.9659	9.65721	9.35751	9.3711	11.4102	10.6738	10.3809	9.507	11.4662	9.9561	8.96734	9.22224	11.9862	10.8952	9.99873	9.71488	12.271	-0.856696	0.321853	0.0670897	-0.0147787	0.0485625	0.289788	0.136428	0.164236	-0.186072	-0.179934	-0.0620215	-0.0726957	0.622285	0.403562	0.132852	-0.300379	0.104567	-0.821945	-0.274543	0.162522	0.143303	-0.120564	0.118107	0.174471	-0.199462
F9X1V6	11.2664	13.161	9.94153	11.3478	12.124	13.3266	10.3623	11.6757	11.7849	12.0034	10.5363	11.4355	11.9077	12.6704	9.83892	11.789	11.9934	12.6495	9.89896	11.3752	12.6144	13.0015	10.1864	12.0094	-0.123007	0.108773	-0.0609608	-0.132496	0.29889	0.106255	0.102005	0.0605579	0.0256286	0.364586	0.0401609	-0.232696	-0.169313	-0.112859	-0.155952	0.208914	0.116303	0.0542997	-0.218542	-0.261995	-0.163033	0.0762259	-0.0311355	0.0993915	-0.0472849
F9X1X5	12.5763	13.6574	7.83036	9.07419	12.928	13.5767	7.07028	9.06886	12.9374	12.6835	7.37704	9.24158	13.2471	13.1639	7.11405	9.13468	13.1544	12.986	7.49129	9.18277	13.8496	13.5831	7.60326	10.3083	0.019904	0.132166	0.540883	-0.135765	-0.0641103	-0.116625	-0.476966	-0.27594	0.102124	-0.0817017	0.0255868	-0.0256972	0.00312549	-0.09237	-0.167798	-0.175069	0.110322	-0.0822905	0.0868053	-0.184051	-0.0948281	0.184817	0.0987772	0.668701	-0.0750697
F9X1Z3	NaN	11.3148	10.7986	11.9462	NaN	11.5333	10.269	11.3185	NaN	10.724	10.4686	11.7782	NaN	10.8293	9.99152	11.0464	NaN	10.5103	10.6808	11.412	NaN	11.3107	10.4173	11.424	NaN	0.0275797	0.48582	0.583802	NaN	0.0780182	-0.301497	-0.178742	0.486219	-0.0133738	NaN	0.252861	NaN	-0.188943	-0.31359	-0.415795	NaN	-0.319953	0.253054	-0.107317	NaN	0.150437	-0.110412	-0.368168	0.475115
F9X202	14.0394	14.9879	13.4435	14.4202	14.2945	14.8825	13.7608	14.4919	14.236	13.7502	13.68	14.2424	14.6545	14.1415	13.7542	14.5781	14.6555	14.3901	13.8453	14.5603	15.1835	14.5784	13.8086	14.6602	0.0879451	0.282652	-0.14702	0.0530783	-0.0927298	0.00914019	-0.087432	-0.0100025	-0.0541434	-0.0797174	-0.0708503	-0.139006	0.015371	-0.294769	0.171295	0.111266	0.216309	0.14183	0.139799	0.0363959	-0.156045	0.000151619	0.00307562	-0.136594	0.141517
F9X222	NaN	10.9532	9.18264	13.3041	NaN	11.0711	10.1243	13.6086	NaN	10.3767	9.78795	13.3819	NaN	10.9799	9.59291	13.3892	NaN	11.194	9.08993	13.7044	NaN	11.0391	10.2002	13.7788	NaN	-0.232624	-0.355424	-0.0986715	NaN	-0.282822	0.328409	0.0710253	0.0497173	0.080619	NaN	0.0069561	NaN	0.0630136	0.0624583	-0.113301	NaN	0.465224	-0.563154	0.144849	NaN	-0.0197477	0.447091	-0.0536191	-0.353481
F9X232	13.8425	15.7353	14.3869	14.6133	14.3877	15.7856	14.6488	14.848	14.3235	14.6363	14.4942	14.5714	14.5463	15.352	14.3389	14.6691	14.4001	15.1484	14.3688	14.608	15.302	15.6538	14.5514	15.0292	-0.0654119	0.0999191	0.0469508	0.0152814	0.0440705	-0.0178763	0.0511097	0.115101	0.0438554	-0.0149577	0.0601421	-0.182996	-0.0492762	-0.0144217	0.00657347	-0.0287876	0.00451002	-0.0300218	-0.0861567	-0.146882	0.00596559	0.145396	-0.00351951	0.00143212	-0.0131338
F9X236	14.841	15.607	14.6349	14.352	15.0715	15.83	14.8246	14.4065	15.103	15.1938	14.8006	14.3663	15.314	15.565	14.6267	14.4851	14.9461	15.1107	14.571	14.5445	15.924	15.5216	14.8883	14.8359	0.2001	-0.114478	0.0354304	-0.0212425	-0.00504739	-0.0595563	-0.032601	-0.101588	0.0635429	0.0318934	0.106749	0.288326	-0.0144679	0.112425	0.0348613	0.012061	-0.182422	-0.153826	-0.14341	0.0143374	-0.104911	-0.0728908	0.0738254	0.0328889	0.0427243
F9X237	13.3295	14.7004	13.548	14.7915	13.7288	14.7671	13.8297	14.9366	13.5958	13.8496	13.894	14.6449	13.9225	14.3469	13.5794	14.877	13.6751	14.0545	13.8632	14.9932	14.5631	14.4389	13.9459	15.0935	0.0861244	0.0906838	-0.103817	0.0271332	0.0496603	-0.0106873	-0.0798489	0.0374635	-0.0489595	0.0729024	-0.0029279	0.0559343	-0.00851014	0.00613488	-0.0647433	0.0128694	-0.0559946	-0.0982294	0.096408	0.0719657	-0.068352	-0.0438363	0.0790992	-0.100472	0.0584214
F9X249	11.9655	12.2052	11.2109	12.8086	12.3477	12.2681	11.7323	13.1322	12.3201	11.7035	11.6389	13.0366	12.3544	12.0269	11.0929	12.9857	12.3057	11.8017	11.3356	13.1863	12.8959	12.1257	11.5376	13.4171	0.159667	-0.0668233	-0.0888637	-0.160717	0.106184	-0.172013	0.174699	0.0281044	0.137809	0.169844	0.15889	0.247598	-0.138995	0.0238244	-0.199269	-0.0833913	0.0122421	-0.0132495	-0.0792338	0.0601109	-0.297988	-0.0193366	0.022823	0.018084	0.0299201
F9X263	13.2865	13.9924	11.3809	13.209	13.9758	14.8267	11.5969	13.2662	13.7299	13.8168	11.6167	13.3845	14.2171	14.2664	10.8088	13.3891	14.0212	13.9175	11.3002	13.2768	15.0631	14.2933	11.5234	13.6445	-0.203403	-0.443268	0.13463	-0.0276318	0.0502689	0.22299	0.0928975	-0.105177	0.218437	0.201204	-0.115297	0.197198	0.0396553	0.0997061	-0.42984	0.0527193	0.0436159	-0.0612034	-0.0610382	-0.116619	0.185161	-0.015422	0.0621464	-0.0217287	-0.187457
F9X264	12.5886	13.7858	11.5628	9.55332	12.7229	14.0814	11.4225	10.3631	12.8131	13.1658	11.3687	10.0965	13.0942	13.6663	11.0167	9.47693	12.8381	13.3285	11.632	10.2862	13.9438	13.8155	11.8572	10.7504	0.147554	-0.104961	0.211031	-0.409307	-0.153851	0.0225986	-0.187025	0.265681	0.204329	-0.152331	0.016696	0.0912029	-0.0344671	0.0445764	-0.327377	-0.585491	-0.0906242	-0.105178	0.165201	0.166724	0.114693	0.0517608	0.290502	0.358065	-0.242676
F9X275	8.11484	11.5089	10.2186	11.5163	9.89424	11.2197	10.946	11.4551	8.96321	10.5587	10.201	10.7377	10.024	10.8271	10.2435	11.5736	10.0646	11.2945	11.0167	11.7112	10.6606	11.1606	10.7199	11.5991	-0.946353	0.16386	-0.21415	0.209284	0.397334	-0.293503	0.255541	0.0131754	-0.49888	-0.400957	-0.453351	0.0297236	0.275234	-0.249008	-0.181562	0.166753	0.515742	0.406439	0.468943	0.24728	0.211394	-0.0575118	0.0721843	-0.137612	-0.218953
F9X284	14.8479	16.4954	15.291	15.9471	15.1746	16.5741	15.3454	15.9941	15.231	15.3169	15.1896	15.8364	15.3786	15.8837	14.8489	16.0351	15.1872	15.7217	15.0029	16.008	16.4957	16.3116	15.4036	16.4412	0.0211054	0.194669	0.235636	0.0285375	-0.0878885	0.105306	0.0322775	-0.0592587	-0.0116504	-0.0349525	0.0488735	-0.167761	-0.135759	-0.148054	-0.198831	0.0168	-0.127225	-0.122013	-0.167385	-0.0674409	0.280894	0.137853	0.133255	0.0930125	-0.0412665
F9X296	9.52458	11.4252	12.0334	13.1801	10.4356	11.4859	12.4717	13.3274	9.70498	10.621	12.6275	13.0382	10.6189	10.903	12.3208	13.3454	10.342	10.8412	12.9117	13.3257	11.1614	11.1652	12.6823	13.374	-0.21425	0.101427	-0.349574	0.0400609	0.261016	-0.00593787	-0.169071	0.0525541	-0.031315	0.0752481	-0.389231	0.113306	0.192495	-0.151797	-0.0545765	0.105595	0.115455	-0.0254801	0.413662	0.0288498	0.0345154	-0.0315175	0.0843117	-0.195745	-0.0784753
F9X2A6	14.2021	16.2059	15.2881	15.3589	14.8994	16.4177	15.4201	15.6215	14.577	15.5708	15.4034	15.4648	14.9932	16.1564	15.2926	15.5499	14.7075	15.8172	15.5281	15.6089	15.572	16.1944	15.477	15.8841	-0.0639871	-0.104666	0.0114949	-0.0973257	0.197527	-0.0609173	-0.1143	0.030418	0.0790553	-0.0425372	-0.0445303	0.07632	0.0394393	0.114807	0.023543	-0.00610745	-0.0463208	-0.0363588	0.136455	-0.00416195	-0.0821282	0.010815	-0.0146557	-0.00187826	-0.0416591
F9X2C8	10.5084	NaN	10.7601	10.6496	10.4823	NaN	10.8348	10.4387	11.026	NaN	10.7378	10.4653	11.1186	NaN	10.0215	10.8887	11.149	NaN	11.0859	10.6585	11.5601	NaN	10.7144	11.0648	0.0934101	NaN	0.192613	0.0804719	-0.368395	NaN	0.00948815	-0.265294	-0.0333768	0.00104843	0.255615	NaN	0.0159637	NaN	-0.53837	0.219732	0.246328	NaN	0.403333	-0.0675218	-0.242922	NaN	-0.0681122	0.0659884	0.203847
F9X2D3	13.1513	14.3204	13.5954	14.8134	13.5292	14.454	13.6924	14.8674	13.4957	13.4184	13.6632	14.6171	13.923	13.7597	13.5893	14.871	13.6651	13.5734	13.7026	14.8969	15.0309	14.202	13.8173	15.2627	-0.0888574	0.115559	0.0435831	0.0504445	-0.14666	0.0811426	-0.117168	-0.0304013	-0.0754148	-0.0578324	-0.0997732	0.0296507	-0.00478	-0.176177	0.0451292	0.00826093	-0.062691	-0.174402	0.0358007	-0.0229442	0.402761	0.124227	0.0504877	0.0700549	-0.1317
F9X2D4	12.0871	11.1948	8.56712	10.8529	12.6587	11.5858	9.4195	11.1988	12.6128	10.4011	9.82941	10.9089	12.9915	11.1098	8.36177	11.1022	12.7194	10.683	9.61051	11.2776	13.7351	11.4884	9.9234	11.3504	-0.154606	-0.13256	-0.593257	-0.137102	-0.018676	0.0904099	0.00134505	0.0739529	-0.010597	0.499763	0.0156727	-0.110135	0.0622088	0.0514756	-0.790988	0.0123601	-0.00999203	-0.187315	0.335117	0.130699	0.105392	0.288124	0.54802	-0.0693129	-0.472437
F9X2E1	12.0403	12.3154	11.4357	13.3447	12.4551	12.589	11.7047	13.3364	12.5593	11.604	11.5787	13.3059	12.8088	12.3477	11.5662	13.5739	12.5782	12.1118	11.4137	13.4027	13.0597	12.4424	11.586	13.6763	0.015757	-0.169793	0.0130804	0.0298364	-0.0050954	-0.0642824	0.0243175	-0.113348	0.0615499	-0.0131988	0.179454	-0.0651571	0.0967359	0.131441	0.151275	0.159217	0.0659847	0.0835653	-0.123922	-0.0689888	-0.352836	0.0842255	-0.051552	-0.0682662	0.0693276
F9X2E2	14.6846	16.6855	15.1457	16.3901	15.0251	16.8012	15.3134	16.4086	15.0637	15.6232	15.2435	16.2561	15.4626	16.0947	14.9615	16.4276	15.3089	16.0664	15.1847	16.497	16.3573	16.4372	15.3879	16.7148	-0.07331	0.150652	0.0644739	0.0661927	-0.168615	0.0982584	-0.0255444	-0.050187	0.00273041	-0.00701425	-0.049635	-0.095578	0.0170397	-0.171246	-0.112059	0.00385797	0.0632462	-0.0114519	-0.0115133	0.0162109	0.211274	0.0293657	0.0916575	-0.038805	-0.0213709
F9X2E4	8.62994	10.4992	NaN	10.115	9.84558	11.144	NaN	9.95674	9.69924	10.4969	NaN	10.0543	9.79076	10.8482	NaN	9.99972	9.57412	10.152	NaN	9.55789	10.2926	10.6598	NaN	10.8265	-0.44969	-0.384282	NaN	0.155109	0.330236	0.0924103	NaN	-0.138034	0.164904	NaN	0.264237	0.429414	0.0235177	0.233663	NaN	-0.060008	0.00681409	-0.274492	NaN	-0.558908	-0.175114	-0.096714	NaN	0.436936	-0.281323
F9X2E8	12.4488	13.9432	13.1299	14.8515	12.8747	14.0631	13.7785	15.1524	12.962	12.6591	13.3002	14.9081	13.2396	13.3842	13.2529	15.0235	13.156	13.4022	13.4574	15.0887	14.2325	13.9743	13.6101	15.4926	-0.144408	0.12204	-0.16665	-0.109562	-0.154176	0.0738521	0.224121	0.0565066	0.0175995	-0.165649	0.01341	-0.346015	-0.0412255	-0.168003	-0.0361004	-0.0372718	0.0751094	0.0380116	0.0457747	-0.0292123	0.25129	0.280114	0.0985038	0.10194	-0.257607
F9X2E9	12.129	13.1483	11.5143	9.36966	12.4388	13.2978	11.6461	8.8288	12.6269	12.2222	11.8557	9.29967	12.8885	12.8253	11.5092	8.10129	13.0024	12.7352	11.8758	9.28977	13.3498	13.1098	11.9332	9.70242	-0.0511863	0.00837809	-0.0832046	0.396172	-0.177133	-0.0102447	-0.20914	-0.279527	0.396681	0.0889853	0.0913851	-0.101629	0.020726	-0.0456619	-0.0806733	-0.97199	0.33459	0.0522844	0.163338	0.159416	-0.218382	0.0968728	0.120695	0.299246	-0.00706819
F9X2F3	13.8763	13.6032	13.0562	12.7363	14.2004	14.1337	13.0497	13.0193	14.0668	13.2172	12.8986	13.0059	14.3246	13.8741	12.6543	12.8702	13.9789	13.0627	12.3354	12.665	15.1745	13.662	12.9294	13.2064	0.165135	-0.239142	0.360486	-0.0557514	0.0535297	0.123318	0.0961934	0.0923523	0.284342	0.0336441	0.000279635	0.190985	-0.074197	0.300773	-0.0337453	-0.0216687	-0.219978	-0.322628	-0.475306	-0.283946	0.0752307	-0.0533064	0.0187275	-0.0153281	0.051351
F9X2G1	12.4578	12.7509	5.89115	10.2923	12.917	12.86	7.75335	10.0828	12.6594	12.4891	6.97304	10.49	13.0726	12.1483	8.24669	10.1572	12.6657	12.0586	6.15846	10.5731	13.6736	12.3888	8.11421	11.1049	0.109179	0.0514703	-1.17343	-0.0326261	0.132668	-0.00754625	0.430999	-0.376972	0.235607	-0.260806	-0.0446168	0.605739	0.0363974	-0.282199	1.18974	-0.267518	-0.17062	-0.183839	-1.02113	0.0912737	-0.0630086	-0.183624	0.834629	0.350235	-0.495908
F9X2G7	12.8952	14.585	14.4025	14.1818	13.311	14.4524	14.5646	14.3443	13.3986	13.5222	14.6223	14.2091	13.5401	13.8544	14.3659	14.2011	13.5943	13.8291	14.6785	14.4051	14.2858	14.1616	14.6334	14.6382	-0.0498914	0.267406	-0.0171633	-0.0230329	-0.0698054	-0.0333271	-0.112791	0.00465038	0.0747721	0.0334303	0.0981083	0.0206879	-0.0926069	-0.194273	-0.0461099	-0.103469	0.161522	-0.0314803	0.143889	0.0434108	-0.0473272	-0.0290138	-0.00125501	0.00366896	0.0628113
F9X2H4	17.6284	18.9298	18.1568	18.8468	18.1592	18.749	18.269	18.8907	18.1283	17.4733	18.1476	18.6411	18.3253	18.0166	17.8958	18.7906	18.0722	17.9559	18.0015	18.8127	19.3288	18.567	18.3391	19.1891	-0.0862018	0.397708	0.146783	0.110072	0.0088238	0.0487979	0.00118198	0.019113	-0.0251261	-0.0317424	0.0582807	-0.24267	-0.0769593	-0.246526	-0.106688	-0.0459102	-0.130132	-0.119205	-0.123555	-0.0808766	0.226189	0.161895	0.11402	0.0227283	0.0108821
F9X2I2	8.918	13.9527	11.9574	14.3824	9.73388	14.032	12.7386	14.8144	9.47869	12.7595	12.9157	14.6888	10.9891	13.5777	12.4394	14.9109	10.8838	13.799	12.5993	14.7252	11.1544	13.4892	12.1677	14.7596	-0.715906	0.100816	-0.387381	-0.206037	-0.335743	0.01213	0.13603	0.091135	0.170845	0.401616	-0.510591	-0.276273	0.667598	-0.00520844	0.102261	0.222675	0.762208	0.404151	0.139521	-0.0201099	0.132434	-0.235616	-0.392047	-0.258508	-0.113693
F9X2I3	15.376	16.6323	15.2804	15.4876	15.6559	16.5177	15.6134	15.5106	15.0504	15.3538	15.3841	14.8975	14.9591	15.6461	14.4822	14.5561	14.1193	14.8156	14.0481	13.9557	15.0831	15.3533	14.3498	14.5478	0.894416	0.662306	0.545617	0.786796	0.738629	0.379667	0.620887	0.675009	0.267212	0.48009	0.213408	0.199905	-0.210042	-0.0548818	-0.244893	-0.244406	-0.849905	-0.697362	-0.801706	-0.901969	-0.786506	-0.489635	-0.599994	-0.582641	1.33698
F9X2J0	14.6345	15.9221	14.6413	16.0201	14.9073	16.0981	14.8889	16.0539	14.7966	15.0305	14.6841	15.8797	15.4215	15.6272	14.6776	15.9117	14.9932	15.4071	14.7174	16.0158	16.078	15.7945	14.9133	16.4273	0.0550146	0.0253705	0.0124632	0.09378	-0.107862	0.0332599	0.00225596	-0.00724559	0.0239433	-0.114029	-0.138185	-0.0501458	0.154408	-0.00056277	0.0563192	-0.114408	-0.0739294	-0.0326643	-0.0264594	-0.0673831	0.110553	0.0247424	0.0694501	0.0713132	-0.0223577
F9X2J3	11.103	13.1158	11.7254	12.6033	12.0704	13.49	11.976	12.6816	11.6232	12.2066	12.3383	12.7175	12.0291	12.5703	11.7405	12.5041	12.1288	12.7686	11.8511	12.7393	12.6445	13.0821	12.1732	13.0118	-0.271083	-0.0066089	-0.117099	0.0188433	0.260561	0.199475	-0.124327	-0.0377525	0.203551	0.326545	-0.106244	-0.0996795	-0.0326031	-0.283126	-0.0943482	-0.180199	0.266982	0.103209	-0.106436	-0.00208676	-0.117613	0.0867305	0.115665	-0.00235605	-0.114594
F9X2L7	14.1778	16.2569	14.4708	15.9012	14.4829	16.1945	14.7492	16.0012	14.3595	14.95	14.7587	15.6639	14.7255	15.5492	14.5797	15.9532	14.7896	15.5822	14.7168	15.9304	15.1668	15.9494	14.8405	16.2846	0.119841	0.259695	-0.0902213	0.0705742	-0.0107529	0.0292489	-0.0696039	0.0357041	-0.0961968	0.0284074	-0.0538005	-0.231098	-0.0200513	-0.179082	0.026278	0.0227372	0.243939	0.042041	0.0406826	-0.0570891	-0.279175	0.0791945	0.0644571	0.0242704	0.117785
F9X2M5	11.0334	13.9067	12.5715	12.1263	11.3466	13.6322	12.4336	12.0716	11.3468	12.7937	12.565	11.1396	11.8413	13.1154	12.4877	11.9815	11.2097	13.0821	12.549	11.5694	12.743	13.4522	12.803	12.2045	0.00568879	0.326149	0.128132	0.402563	-0.116884	-0.116436	-0.267621	0.213067	-0.513633	-0.0476648	-0.0362644	0.0292597	0.125985	-0.196225	0.0519533	0.15798	-0.305715	-0.0414317	-0.00942966	-0.311119	0.32719	-0.00131609	0.14463	0.0511419	0.0852217
F9X2N9	11.0188	12.9611	11.4498	11.2812	11.3354	13.2505	11.4783	11.2887	11.2674	12.2129	11.8148	11.1072	11.4676	12.9253	11.5855	11.4998	11.3682	12.6787	11.1976	11.723	12.0548	12.9419	11.7094	11.6723	0.159183	-0.117428	0.0354377	-0.0223642	0.0400841	0.00383887	-0.19379	-0.149745	-0.125876	0.231187	0.0524106	-0.0495594	-0.0796984	0.115666	0.178769	0.0964057	0.0208589	0.0571459	-0.331697	0.262563	-0.192838	-0.00966344	0.0800936	-0.0609843	0.0595553
F9X2P4	12.901	11.4703	8.40901	12.4854	13.0527	11.5818	8.14807	12.7098	13.0272	10.7813	7.96151	12.5547	13.3426	11.0204	7.99763	12.9216	12.746	10.8127	8.99735	12.831	14.225	11.167	8.76115	12.9719	0.244295	0.0812075	0.154796	-0.135198	-0.0396661	0.0246361	-0.363918	-0.0456909	0.00454192	-0.461971	0.0151705	0.208272	-0.00166419	-0.0997093	-0.248962	0.20122	-0.398394	-0.11935	0.628122	0.0535268	0.180259	-0.0950559	0.291934	-0.0784001	0.0115907
F9X2P5	14.7258	15.5998	15.0987	14.9231	15.0059	16.1788	15.2895	14.7986	14.9087	15.639	15.2613	14.8544	15.1969	15.8817	15.0163	14.9182	14.8079	15.3362	14.6172	15.0821	16.0558	15.7293	15.2254	15.452	0.168021	-0.377825	0.138917	0.0435226	0.0124416	0.0331078	0.0719263	-0.215884	0.0453174	0.132171	-0.00442675	0.477467	-0.0484707	0.173046	0.0640923	-0.0611991	-0.23759	-0.184417	-0.457646	0.0455885	0.110025	-0.121378	0.0505394	0.142655	-0.0523017
F9X2R5	16.472	16.6869	16.6537	16.682	16.9105	17.1822	16.6127	16.7918	16.8099	16.4702	16.6427	16.8225	17.0583	16.8481	16.4462	16.7682	16.758	16.3685	16.2163	16.7993	17.7259	16.978	16.5458	17.3525	0.0753236	-0.318937	0.259027	-0.0623298	0.0780908	0.00833672	-0.0397647	-0.0872961	0.148746	0.078806	0.0578016	0.280498	-0.0259953	0.1112	0.0591413	-0.0758365	-0.126406	-0.180292	-0.293341	-0.101833	-0.0588148	0.099194	-0.0638687	0.178549	-0.050494
F9X2T3	14.3482	15.2841	14.8247	15.4742	14.6291	15.8055	15.1772	15.7405	14.6419	14.892	14.9664	15.6153	15.1644	15.4945	14.9379	15.8655	14.8161	15.148	14.8771	15.9438	15.7049	15.2114	14.8939	15.8564	0.0231556	-0.271974	0.00341604	-0.149959	-0.131666	0.0813845	0.0981177	-0.0184983	0.061615	-0.024144	-0.0385138	0.151987	0.151768	0.207397	0.124206	0.141544	0.00343698	0.0488905	-0.059215	0.16278	-0.00818044	-0.217684	-0.142381	-0.197481	0.0425911
F9X2T8	17.3863	18.5544	17.3072	18.2752	17.6855	18.8066	17.4232	18.374	17.6584	17.7057	17.4186	18.1364	18.2371	18.311	17.2902	18.3247	18.0062	18.0693	17.4736	18.3882	19.1978	18.3763	17.5333	18.678	-0.0831504	0.000380903	0.024452	0.0375447	-0.219688	0.0844679	-0.117312	0.0015654	-0.0307585	-0.0334892	-0.166426	-0.0322544	0.0800132	0.025886	0.015072	-0.0127604	0.0490226	-0.0277543	0.0757823	-0.00625543	0.340229	-0.0507261	0.0354947	0.0106643	-0.0891088
F9X2U0	18.9986	19.9242	19.365	20.6355	19.6549	19.8113	19.7454	20.8687	19.5425	18.9864	19.4993	20.5194	19.3068	19.5401	19.3727	20.5202	19.4465	19.0566	19.6367	20.6445	20.1347	19.6365	19.5134	20.8472	0.0437035	0.181537	-0.0321616	0.0880067	0.264248	-0.0994749	0.0904675	0.186387	0.0424583	-0.0671765	0.232175	0.0597923	-0.335743	0.0663561	-0.0168491	-0.12707	0.00387185	-0.229056	0.124494	-0.0598468	-0.208256	0.0208452	-0.0987747	-0.129935	0.174301
F9X2U2	10.6365	10.441	11.1308	11.1038	11.1527	10.3307	11.6542	11.1698	11.1105	8.98695	11.2578	10.7433	11.2297	9.67634	11.0875	11.3429	11.4252	9.42387	11.4094	10.8619	11.602	10.0837	11.6889	11.4536	0.00284016	0.367048	-0.115715	0.116372	0.0832527	0.0886863	0.149916	0.0475204	-0.173615	-0.158008	0.121479	-0.270885	-0.0916427	-0.128619	-0.151394	0.255621	0.303845	-0.193047	0.0478874	-0.282359	-0.419774	0.136817	0.227314	0.0364606	0.0974319
F9X2V9	13.2262	8.29595	8.71795	14.6062	13.411	8.92428	8.57792	14.7102	13.2684	7.48872	8.2053	14.5285	13.7822	7.17313	8.0649	14.8048	13.5365	6.58819	7.56041	15.0292	13.6627	8.34833	8.60925	15.1764	0.304148	0.24269	0.553567	-0.0778512	0.0531792	0.702934	0.155762	-0.108762	-0.085123	-0.128345	-0.0090926	0.25155	0.172487	-0.611174	-0.0918595	0.0209125	0.12673	-1.00807	-0.718988	0.188217	-0.647452	0.422065	0.229864	0.0626068	0.238868
F9X2W5	12.7142	13.195	12.5031	13.7751	13.291	13.4964	12.6014	13.765	13.2362	12.5017	12.4341	13.5665	13.6633	12.9929	12.2288	13.8737	13.1297	12.5523	12.209	13.879	14.6427	13.1275	12.5981	14.2499	-0.172937	-0.0327451	0.198961	0.0486607	-0.0318094	0.100478	0.0394785	-0.0962987	-0.089399	-0.0393805	-0.00625542	0.0899579	0.088609	0.034034	-0.0677904	0.0475061	-0.245126	-0.218455	-0.210217	-0.00428418	0.367518	0.0267302	0.0789484	0.0938152	-0.131268
F9X2Z5	12.1208	13.0767	11.3962	14.0109	13.0003	13.2245	11.9028	14.238	12.8161	11.9185	12.0125	13.8866	13.3127	12.5438	11.6591	14.4885	13.1754	12.7057	11.6946	14.1783	13.5422	12.813	11.4557	14.1132	-0.314731	0.11287	-0.16573	-0.0165915	0.129026	0.0925111	0.0830714	0.0757233	-0.0703139	0.281313	0.0252486	-0.229245	0.189613	-0.151095	0.104818	0.361208	0.252213	0.198842	0.0176997	-0.00605118	-0.28137	-0.0238842	-0.321173	-0.343975	0.146555
F9X2Z8	12.662	13.8267	13.6724	14.876	13.0532	13.0957	14.0746	14.9206	12.9761	12.0029	14.0807	14.49	13.3247	12.3671	13.7699	14.787	13.4494	12.2994	14.4437	14.6992	14.0071	12.9223	14.4606	15.0188	-0.0243475	0.824235	-0.286315	0.202523	-0.0688883	-0.0749165	-0.141956	0.112232	-0.112973	-0.0473547	-0.0656617	-0.183537	-0.0492141	-0.366437	-0.181179	0.0137288	0.275381	-0.246098	0.369902	-0.131126	-0.0672697	0.046754	0.286902	-0.0843846	0.133523
F9X2Z9	14.7124	16.7157	15.6657	17.0799	15.4261	16.3424	16.12	17.1141	15.2897	14.8171	15.8276	16.5579	15.6876	15.4083	15.6367	16.8459	15.5435	15.5412	16.2162	16.7066	16.8754	15.9155	16.337	17.0648	-0.31763	0.675517	-0.176591	0.310195	-0.0397003	0.134084	0.0199112	0.209522	-0.141344	-0.183938	-0.0957675	-0.407031	-0.0300101	-0.362913	-0.197959	-0.0236816	0.0257579	-0.0419794	0.258894	-0.220029	0.45735	0.00232282	0.279684	-0.134662	-0.028301
F9X302	14.6581	15.319	14.2185	15.6355	14.8399	15.4761	14.5656	15.8486	14.7053	14.3269	14.3859	15.5822	15.2078	15.0285	14.2697	15.8716	15.112	14.9237	14.4004	16.0369	15.2232	15.0336	14.2981	16.0863	0.259444	0.0508498	-0.0129802	-0.0828609	0.00556732	0.0398832	0.0763952	-0.00467385	-0.065731	-0.0148711	-0.0487775	-0.125107	0.12155	0.029354	0.0458637	0.0533928	0.225699	0.112588	0.0539312	0.161679	-0.563483	-0.107567	-0.148339	-0.0618057	0.273912
F9X308	15.0007	16.1279	14.9152	15.638	15.1571	16.5931	14.9329	15.7435	15.0883	15.8225	14.8666	15.8663	15.5906	16.2489	14.5369	15.7837	15.0871	15.8119	14.1374	15.9742	16.4606	16.1273	14.8855	16.4255	0.162408	-0.244227	0.327726	-0.142122	-0.11691	0.0529514	0.0875855	-0.171422	0.156743	0.109837	-0.105467	0.266481	0.0646662	0.145754	-0.0430256	-0.096179	-0.238886	-0.103147	-0.565123	0.0372563	0.23419	-0.117813	0.0830004	0.215724	-0.0778289
F9X313	11.0739	10.2722	9.36761	10.6294	11.2184	10.3414	8.90821	11.1466	11.0968	9.81876	10.0598	10.302	11.5779	9.82791	10.2297	11.0371	11.4361	9.41107	9.95613	10.8119	12.5355	9.94502	10.3083	11.5933	0.143254	0.0859465	-0.312433	-0.165585	-0.148023	-0.0128908	-1.02961	0.216851	-0.422482	0.210441	-0.189282	0.44863	-0.0404423	-0.0893417	0.557236	0.142402	0.0177232	-0.318144	0.161072	-0.139864	0.216771	-0.1142	0.41329	0.368678	-0.283339
F9X316	15.9651	16.7395	16.0416	17.0226	16.3937	17.081	16.5472	17.3127	16.2232	16.166	16.1038	16.9473	16.5461	16.5661	15.8989	17.0891	16.3324	16.3216	16.0422	17.0813	17.2845	16.7495	16.3086	17.4342	0.0666499	-0.114595	0.00944183	-0.000171572	0.0595599	0.0587905	0.257288	0.155145	-0.0049562	-0.0975984	-0.0305992	0.127943	-0.0399714	-0.0190671	-0.125604	-0.0334688	-0.0536509	-0.0754596	-0.104996	-0.0983177	-0.00198823	0.0223877	0.0614677	-0.0182304	-0.0255778
F9X318	12.324	12.2078	9.65594	NaN	12.7623	12.7629	9.06366	NaN	12.556	12.0436	9.90563	6.89567	13.0505	12.7976	9.81866	6.47288	12.7674	12.3202	8.47241	NaN	13.3207	12.7207	8.78103	NaN	0.0862437	-0.517846	0.497959	NaN	0.0888612	-0.130825	-0.352093	NaN	NaN	0.578379	-0.037137	0.134108	0.125147	0.340918	0.668299	NaN	0.0420023	0.0516195	-0.80059	NaN	-0.305117	0.122025	-0.591956	NaN	0.280468
F9X343	14.7127	13.7863	13.6379	14.0909	14.9879	14.0827	13.495	14.1675	14.9757	13.324	13.244	14.0118	15.1213	13.6833	13.1257	14.1353	14.8517	13.18	12.8323	14.2962	16.0328	13.5569	13.3482	14.4287	0.158072	-0.0660956	0.482276	0.0275689	-0.00244991	0.0622848	0.0816126	-0.03063	0.0190573	-0.0808817	0.0657209	0.287764	-0.120894	0.09992	-0.0222536	-0.0277706	-0.190594	-0.215371	-0.43833	0.076053	0.0901453	-0.168502	-0.0224236	-0.0642786	0.19172
F9X351	11.1026	11.9278	NaN	14.051	11.3069	12.1719	NaN	14.1497	11.0345	11.2557	NaN	13.8801	11.3452	12.1416	NaN	14.1167	11.3203	11.9867	NaN	14.3485	11.2301	11.9876	NaN	14.4222	0.438365	-0.234281	NaN	0.0147173	0.206997	-0.158214	NaN	-0.0213287	-0.0856684	NaN	0.014947	-0.0902341	-0.00662647	0.24853	NaN	-0.0193591	0.168415	0.281678	NaN	0.155357	-0.822097	-0.0474781	NaN	-0.0437182	0.377365
F9X361	10.6088	11.3737	12.8662	NaN	11.129	11.4055	13.2731	NaN	10.5475	10.8019	13.1534	NaN	11.3253	10.9794	13.3602	NaN	11.255	11.1786	13.6842	NaN	11.8322	11.0847	13.3746	NaN	0.0515858	-0.0137305	-0.294171	NaN	0.136083	-0.150034	-0.145051	NaN	NaN	-0.176211	-0.365127	0.230494	0.0804721	-0.13908	0.207394	NaN	0.210069	0.248143	0.4088	NaN	-0.113083	-0.175793	-0.000760213	NaN	0.0111067
F9X390	7.70598	NaN	6.94802	9.79333	7.89845	NaN	6.24485	10.0802	7.56978	NaN	7.57622	10.0565	8.1373	NaN	7.14568	10.3413	7.1983	NaN	6.03252	10.1869	9.40288	NaN	6.99661	11.0762	0.2796	NaN	0.24894	-0.337287	0.0363531	NaN	-0.712002	-0.185302	-0.00360644	0.707878	-0.211975	NaN	0.023311	NaN	0.454221	0.11089	-0.715758	NaN	-0.78157	-0.100616	0.588469	NaN	0.0825332	0.515922	-0.331891
F9X3B1	13.2139	13.9633	13.5021	13.7887	13.527	14.227	13.8379	13.9556	13.4383	13.37	13.6415	13.8898	13.8689	13.9921	13.541	14.0663	13.6014	13.8039	13.5603	14.3025	14.8644	14.0422	13.9547	14.4993	0.0206812	-0.186643	-0.0459174	-0.169856	-0.101989	-0.0909681	0.0321465	-0.137854	0.00172143	-0.0757815	-0.110362	0.0361946	-0.0119483	0.111113	0.000592649	0.00789201	-0.0795133	0.111035	-0.102683	0.187064	0.283132	0.0192688	0.191643	0.111033	-0.246703
F9X3D9	16.4198	17.1463	16.279	17.0205	16.7538	17.2827	16.5031	17.0226	16.6434	16.2315	16.3293	16.8101	16.9707	16.8204	16.1914	17.0138	16.6887	16.4826	16.3826	17.026	17.8551	16.928	16.3902	17.3188	0.0903108	0.080899	0.0579514	0.110314	-0.011437	0.0491813	0.0243267	-0.022465	-0.0295604	-0.0609677	-0.0414784	-0.0178183	-0.0464084	0.0239742	-0.0220177	0.0037785	-0.128552	-0.125829	0.0465852	-0.0410204	0.137565	-0.0104073	-0.0458779	-0.0210469	0.0698106
F9X3G5	11.0515	14.7554	12.6956	13.1002	11.5823	15.004	12.8991	13.0654	11.4615	14.0209	13.0092	12.9631	11.936	14.3926	12.6172	12.9152	11.6218	14.2652	12.7657	13.1182	12.5016	14.7051	12.9032	13.5313	-0.0818475	-0.0186141	0.00548806	0.109728	0.0132144	0.0618518	-0.0487351	-0.0598806	0.0431972	0.149841	-0.0272936	0.0629589	0.115043	-0.112477	-0.0653201	-0.175079	0.000703901	-0.0518409	-0.0394017	-0.0290891	-0.0198199	0.0581209	-0.00187235	0.111124	-0.0331993
F9X3H4	11.971	12.9904	11.9219	11.1492	12.513	13.2743	11.8688	11.0627	12.632	12.406	11.8324	10.927	12.814	12.7906	11.8481	11.4361	12.8894	12.6524	12.0966	11.1501	13.536	13.1039	12.1828	11.3796	-0.195865	-0.12934	0.0883878	0.0901749	-0.0895404	-0.0135216	-0.22248	-0.131186	-0.0614574	-0.170417	0.109831	0.10231	-0.0404005	-0.0601913	0.0221678	0.277347	0.234841	-0.0103865	0.148076	-0.0657944	-0.0188664	0.11113	0.134265	-0.109084	-0.0660219
F9X3H6	12.3166	14.0106	10.782	11.0074	12.9379	14.3497	10.8059	11.6166	12.8924	13.1882	10.5746	11.173	13.4022	13.6253	10.0312	11.4008	12.9169	13.4691	9.48531	11.418	14.308	13.9085	10.7425	11.9765	-0.25335	0.00188389	0.503336	-0.299491	-0.0677084	0.172883	0.269451	0.174818	-0.0634428	0.126648	-0.0329381	-0.00440902	0.144689	-0.114519	-0.239841	-0.00595693	-0.140724	-0.0825915	-0.908387	-0.0458386	0.350032	0.0267523	0.248793	0.239911	-0.228277
F9X3I3	12.447	14.3562	13.5291	13.896	12.8468	14.5844	13.6973	13.961	12.7189	13.3811	13.665	13.9281	13.0453	14.002	13.3938	13.9744	12.7426	13.6764	13.3263	13.8805	13.5	14.1303	13.5509	14.2296	0.122615	0.0842744	0.126919	0.0428596	0.0867196	0.144392	0.0373736	-0.0270304	0.145465	0.093592	0.0391992	-0.074676	0.0332918	-0.000917379	-0.000732005	0.0214347	-0.0693951	-0.138497	-0.19087	-0.129507	-0.212431	-0.0145755	-0.066283	-0.0532222	0.180795
F9X3I5	13.0983	13.5688	12.7116	10.9296	13.5537	13.8628	12.8396	10.9906	13.6068	13.2132	12.8643	10.9224	13.371	13.6191	12.5984	10.631	13.4546	13.5433	12.7172	10.813	14.2223	13.7225	12.9075	11.1806	0.106229	-0.269644	0.0634548	0.143545	0.125996	-0.143682	-0.066348	0.0696786	0.206784	0.0468267	0.259342	0.190822	-0.308683	0.0496029	-0.0421692	-0.254879	-0.0251548	0.161849	-0.0460417	-0.129961	-0.157729	0.0110529	0.0442774	-0.0351675	0.0452876
F9X3J3	11.2212	NaN	12.1678	14.6182	11.8806	NaN	13.0149	14.5061	11.33	NaN	12.921	14.3127	12.0995	NaN	12.4152	14.6855	11.9618	NaN	12.9785	14.6876	13.0973	NaN	13.0852	14.9378	-0.151434	NaN	-0.471064	0.118616	0.0722385	NaN	0.118277	-0.128319	-0.116293	0.11288	-0.39807	NaN	0.0392117	NaN	-0.216025	0.0861841	0.101475	NaN	0.224588	0.0311962	0.336579	NaN	0.231344	0.00861567	-0.36014
F9X3K9	13.3216	14.8828	13.9512	14.8956	13.6741	14.7174	14.1811	14.9441	13.6799	13.6732	14.2223	14.6273	13.9452	14.122	13.8782	14.8995	13.6434	13.9935	14.1471	14.8357	14.8204	14.5959	14.3609	15.1721	0.0332746	0.301877	-0.0473821	0.125005	-0.0500092	-0.0316847	-0.0752762	0.0386152	-0.0728055	0.0545011	0.0361718	-0.09167	-0.0308118	-0.189978	-0.112713	0.0291369	-0.132644	-0.130482	0.0335359	-0.0917709	0.144019	0.141938	0.147334	-0.0281803	0.00191566
F9X3L2	13.6371	13.0575	13.4567	14.0594	14.0161	12.9395	13.6401	14.0807	13.9053	11.6034	13.6376	13.8671	14.2986	12.5337	13.2936	14.0502	14.1255	12.4195	13.5719	14.0611	14.9087	12.6927	13.5719	14.2161	0.0476115	0.266296	0.0530004	0.128783	-0.00907332	-0.0197973	-0.0213815	0.0151662	0.00694549	0.0646393	-0.0395496	-0.371709	0.021489	0.0114654	-0.102504	0.0197517	0.0483511	0.0853057	0.0531183	-0.0263861	-0.0688285	0.0284393	-0.0468731	-0.144261	0.181803
F9X3L8	NaN	12.2192	9.30138	12.5353	8.62425	12.2929	10.2837	12.7761	7.51001	11.0434	9.95305	12.2603	7.87848	11.6392	10.2247	12.6125	8.56423	11.9049	10.2942	12.7562	9.46944	12.0095	10.1855	12.9189	NaN	0.11752	-0.614124	0.0171805	NaN	0.023135	0.110387	0.123149	-0.187316	-0.131725	NaN	-0.242182	NaN	-0.193543	0.316838	-0.00540888	NaN	0.260233	0.263641	0.0812486	NaN	0.0348374	0.054984	-0.0288534	-0.180131
F9X3L9	14.5788	15.5354	14.648	14.5155	15.3447	16.0541	15.4497	15.2003	15.4211	15.5145	15.5308	15.2555	15.8688	16.1531	15.4757	15.3627	15.7007	15.9165	15.2989	15.5693	15.7171	15.5487	14.9745	15.3259	-0.300679	-0.501838	-0.456716	-0.564271	0.0295624	-0.151148	0.0872741	-0.014277	0.246253	0.256857	0.186237	0.293383	0.3017	0.384814	0.37861	0.183148	0.333541	0.336265	0.0791562	0.33268	-0.550361	-0.361475	-0.345181	-0.183534	-0.0957382
F9X3M4	14.1103	14.5971	14.1298	14.6114	14.4938	14.8065	14.0176	14.7322	14.5517	13.9799	14.009	14.7928	14.6129	14.3989	13.9231	14.8301	14.3266	13.9928	13.7498	14.9351	15.2994	14.5962	14.0569	15.3253	0.1036	-0.0482721	0.273639	-0.134681	0.0513535	-0.00697547	-0.0963091	-0.148671	0.117295	-0.0163509	0.189612	0.150568	-0.0814028	0.0225115	0.0746354	-0.0157246	-0.167828	-0.195625	-0.221375	0.032208	-0.0953348	0.0777936	-0.0142396	0.149574	0.019123
F9X3M7	14.948	15.9298	14.9809	14.9322	15.1524	16.1929	14.9712	14.9997	15.0215	15.5642	14.8467	14.8023	15.332	15.8721	14.8471	14.967	15.0749	15.4809	14.7546	15.1384	16.0287	16.0256	14.9243	15.4117	0.247526	-0.164627	0.218349	0.0154091	0.0161232	-0.0695855	-0.0490938	-0.051907	-0.0439896	-0.0851491	-0.0343974	0.285904	-0.0560939	0.0466888	0.0921285	-0.0495502	-0.113347	-0.156534	-0.122936	0.0647334	-0.0598111	0.0581543	-0.0532984	0.0653043	0.0765769
F9X3N6	14.7842	15.8832	14.921	15.4072	15.3159	16.2241	15.1415	15.5925	15.3558	14.9339	15.0754	15.5054	15.7312	15.6545	14.9318	15.572	15.3437	15.3763	14.8844	15.5524	17.0023	15.8449	15.2444	15.961	-0.245609	-0.0197691	0.0127791	-0.0661118	-0.149575	0.153011	-0.0244048	-0.0156662	0.102601	-0.00204847	-0.0293273	-0.152975	0.0137669	0.0204444	0.0312873	-0.00105568	-0.173721	-0.06965	-0.138831	-0.077773	0.584466	0.0689392	0.121218	0.058006	-0.287835
F9X3P5	12.741	12.0209	12.7598	NaN	13.2761	12.4717	12.9243	NaN	13.1818	11.8422	12.8791	NaN	13.3304	12.1427	12.6968	NaN	12.8373	11.4557	12.7834	NaN	14.6445	11.9903	12.7101	NaN	-0.0351045	-0.216481	0.0925035	NaN	0.0642757	0.0661923	-0.000768766	NaN	NaN	0.0424578	0.0503256	0.420856	-0.133339	0.174279	0.0370925	NaN	-0.42651	-0.324734	0.00100958	NaN	0.480352	-0.120113	-0.172295	NaN	-0.115676
F9X3Q5	7.8824	12.7792	11.6927	12.6051	8.16038	12.9935	11.7927	12.6654	8.10397	11.4029	11.8602	12.284	6.36718	12.442	11.7747	12.4465	7.13791	12.1559	11.7154	12.5287	9.14624	12.6533	11.6774	13.0381	0.641789	0.124624	0.0654055	0.13561	0.484048	0.170746	-0.092319	0.0610411	-0.115031	0.0636366	0.507984	-0.435629	-1.56104	0.0563474	0.15503	-0.122824	-0.590373	-0.041755	-0.0269057	-0.0976576	0.517591	0.125667	-0.164848	0.138862	0.0875392
F9X3Q8	15.237	16.315	15.4524	16.3787	15.6774	16.3078	15.7201	16.5946	15.5032	15.0566	15.783	16.4338	16.063	15.6085	15.5211	16.556	15.9263	15.6808	15.8462	16.7232	16.8117	15.9158	15.9129	16.7748	-0.0736529	0.2508	-0.128652	-0.073018	-0.0690337	0.0754462	-0.118691	0.00798427	0.0525361	0.0326524	-0.162879	-0.191583	0.0647085	-0.186807	-0.0522941	0.00448453	0.127919	0.0736079	0.150132	0.114614	0.112938	-0.0214645	0.116853	-0.106601	-0.0315621
F9X3U2	12.4005	12.79	9.96423	13.4053	12.8895	12.9442	10.0232	13.559	12.5368	12.2191	9.52105	13.2251	12.7715	12.606	9.26859	13.5	12.5371	12.4063	10.0142	13.4843	13.6234	12.9255	9.78059	13.7448	0.166449	-0.108681	0.327163	0.0439572	0.219739	-0.122528	0.128363	0.0628619	-0.0656639	-0.285278	-0.0526299	0.136545	-0.150224	-0.0237329	-0.360854	0.038862	-0.184639	-0.0354172	0.262084	-0.0338557	0.00130403	0.153814	-0.0714785	-0.0461613	0.0978527
F9X3U4	15.3034	16.2264	15.2089	15.9943	16.1611	16.6609	15.5811	16.4969	15.4508	15.879	15.7278	16.1988	15.5177	16.0956	15.076	15.9458	14.9502	15.5831	14.2305	14.7927	14.7003	15.1306	14.1194	15.1094	0.515182	0.0470016	0.343167	0.363133	0.937185	0.313412	0.457564	0.730847	0.638059	0.692859	0.307213	0.51565	0.0419513	0.185136	0.217885	0.214774	-0.325656	-0.139359	-0.750183	-0.995317	-1.47588	-0.92184	-0.961293	-0.951495	1.39475
F9X3V3	13.6278	12.2052	13.3659	13.7141	14.2807	12.8596	13.8921	14.2672	14.1675	12.5968	13.8616	14.0233	14.395	12.7565	13.8814	14.3133	14.2752	12.7896	13.7206	14.3003	14.2981	12.525	13.8331	14.578	0.012787	-0.667075	-0.268282	-0.360124	0.230004	-0.180757	9.97037e-05	0.058124	0.019565	0.0581111	0.197146	0.540643	0.0924145	0.153167	0.254826	0.139254	0.172527	0.374355	-0.0286433	0.0691611	-0.704878	-0.220333	-0.0161117	0.0740198	-0.103848
F9X3V8	11.213	13.6312	NaN	9.24374	12.3404	13.8797	NaN	9.19377	12.2427	13.2794	NaN	9.57767	12.6129	14.0308	NaN	9.65148	12.4047	13.6148	NaN	9.47064	13.4021	13.5278	NaN	9.46976	-0.597243	-0.279602	NaN	-0.0656575	0.0944342	-0.199182	NaN	-0.25047	0.338778	NaN	0.0771253	0.184732	0.11508	0.388935	NaN	0.242289	0.106786	0.161053	NaN	0.00437773	0.203817	-0.255938	NaN	-0.269317	-0.207021
F9X3X9	11.9091	12.9959	10.1448	NaN	12.7521	13.9676	9.51657	NaN	12.5275	12.9605	9.20801	NaN	12.7776	12.9717	9.182	NaN	12.4286	12.8031	8.42664	NaN	14.2382	13.2113	8.60448	NaN	-0.303989	-0.405913	1.08928	NaN	0.103257	0.397647	0.203285	NaN	NaN	-0.0167591	-0.0409827	0.374776	-0.123136	-0.161156	0.134109	NaN	-0.272161	-0.141789	-0.743879	NaN	0.637012	-0.063565	-0.666034	NaN	0.157321
F9X3Y1	10.4109	10.3497	10.7851	12.3992	11.6667	10.8919	10.6825	13.0695	10.6345	8.93684	10.9352	12.7702	10.8476	10.9598	11.1388	12.8843	11.2472	10.2482	11.0575	12.8289	12.2114	10.5757	10.8887	13.1674	-0.199765	-0.227468	-0.00460134	-0.32893	0.620353	0.146661	-0.365033	0.206533	0.112588	-0.0238272	-0.331478	-0.824259	-0.450644	0.651553	0.35674	0.0563471	0.148839	0.127979	0.15271	-0.056135	0.212694	0.125534	-0.115989	0.00959668	-0.24815
F9X3Y2	16.0465	16.8662	16.0594	16.2903	16.3255	17.015	16.1258	16.402	16.2276	16.324	16.0543	16.218	16.5995	16.7685	15.9302	16.3917	16.3868	16.419	15.9339	16.4392	17.4494	16.777	16.1701	16.6942	0.0996588	-0.0789381	0.138698	0.00947198	-0.0570245	-0.0982084	-0.052687	-0.0136765	0.00773911	-0.0356884	-0.0745652	0.195004	-0.0348937	0.0923475	0.0170699	0.0111383	-0.0476921	-0.0690942	-0.10178	0.00155676	0.114517	-0.0411112	0.0343865	-0.0162296	0.0193321
F9X3Y6	16.4851	18.2036	17.129	17.9687	16.9656	17.9459	17.5815	18.0643	16.9009	16.4203	17.4282	17.8085	17.4241	17.1247	17.21	18.0723	17.285	17.2154	17.509	18.0646	18.083	17.5923	17.6379	18.3132	-0.146448	0.536367	-0.162054	0.0452348	-0.101683	0.110643	0.0327146	0.00597487	-0.0444593	-0.0321369	-0.0860093	-0.430838	0.104936	-0.273491	-0.0734099	0.0490011	0.165805	0.005226	0.103	-0.015781	0.0633999	0.0520937	0.131886	-0.0399704	0.0164225
F9X3Z2	13.6697	14.545	13.978	16.3065	14.1027	14.2557	14.1853	16.3126	13.9367	13.5044	14.0133	15.9867	14.4385	14.0361	14.1258	16.2882	14.1784	13.7261	14.1988	16.4553	15.1516	14.2165	14.4442	16.6738	-0.0175429	0.247549	-0.0546762	0.0944235	-0.0202088	-0.209865	-0.105183	-0.0342872	-0.154869	-0.188614	-0.105849	0.0230603	0.0637192	0.00757318	0.100766	-0.0236935	0.00355094	-0.114358	0.0511441	0.0863538	0.0763308	0.04604	0.196563	0.0320722	-0.0203131
F9X3Z3	15.7581	16.653	15.707	15.899	16.1187	17.1865	16.0526	16.1886	16.0342	16.3959	16.1381	15.908	16.7157	17.0975	15.8418	16.1182	16.5436	16.7801	15.8571	15.8865	17.4652	16.9605	16.2078	16.678	-0.12209	-0.442763	-0.135455	-0.0888932	-0.197244	-0.077329	-0.0476336	0.0657881	-0.00946645	0.126315	-0.201383	0.116276	0.147929	0.270751	0.00689024	0.0304966	0.175776	0.141338	-0.100398	-0.258271	0.197011	-0.00827266	0.150282	0.260346	-0.347142
F9X410	13.6219	13.1734	11.0906	12.0814	14.0284	13.6533	11.3522	12.0864	13.9498	13.0401	11.4329	12.2184	14.0135	13.2021	11.1927	12.156	13.5361	12.6128	10.9609	12.2823	15.683	13.0694	11.0475	12.7976	0.0422019	-0.201912	0.0361069	-0.0638602	0.0129696	0.109857	0.0398442	-0.193681	0.143704	0.209054	0.0147141	0.480853	-0.253848	0.0956844	0.145748	-0.0890464	-0.531287	-0.305525	-0.208678	-0.0197954	0.715249	-0.178957	-0.222076	0.222679	-0.181089
F9X421	12.1355	12.6113	12.3063	11.9478	13.6357	13.7639	12.0838	12.0324	12.7943	12.6913	12.2765	12.0025	12.5077	12.8462	11.8368	12.186	12.4404	12.6497	11.8846	11.9148	13.3336	12.996	12.0697	13.0273	-0.113254	-0.565303	0.354868	-0.112207	0.951196	0.419275	-0.125322	-0.162441	0.0129427	0.155844	0.190094	0.330814	-0.428692	-0.0614258	-0.106933	0.0261418	-0.296078	-0.0698256	-0.181778	-0.302051	-0.303266	-0.0535347	-0.0966793	0.537614	-0.130008
F9X431	16.0199	16.6545	16.0911	16.3025	16.2475	17.2148	16.4279	16.618	16.1706	16.3808	16.3682	16.4292	16.8735	16.9343	16.1919	16.6365	16.4455	16.4691	16.2263	16.6405	17.2879	16.6888	16.2674	16.8668	0.0714637	-0.319378	-0.046103	-0.154587	-0.136625	0.0728655	0.0328669	0.026009	0.0425628	0.0617234	-0.133213	0.223037	0.237519	0.229394	0.0622804	0.0795829	0.00938663	-0.04781	-0.0259236	0.0264756	-0.0485317	-0.158108	-0.0848441	-0.020043	-0.0342696
F9X432	15.4507	16.1495	15.3531	15.6838	16.0737	16.6702	16.0059	16.0765	15.8373	15.5036	15.4077	15.6901	16.0904	16.0051	15.2493	15.7528	15.8237	15.6597	15.1221	15.8288	16.989	16.1698	15.5486	16.244	-0.034342	-0.126945	0.0302283	-0.0704294	0.152913	0.225664	0.425251	0.187465	0.00642145	-0.0844499	-0.0031884	0.0432029	-0.0822579	-0.0024795	-0.0659648	-0.101238	-0.149057	-0.159771	-0.315756	-0.0822957	0.115933	0.020329	0.0106923	0.0600761	-0.10213
F9X437	15.1228	16.2985	14.4434	15.1295	15.7056	16.2762	14.5597	15.2462	15.5868	15.1206	14.6207	15.2666	15.7391	15.8543	14.4929	15.4176	15.4116	15.6222	14.7147	15.4006	16.507	16.1818	14.9567	15.8765	0.00302631	0.156065	-0.0630433	-0.134907	0.150099	-0.0342928	-0.204538	-0.153046	0.0727182	-0.0549702	0.111702	-0.205713	-0.0682222	-0.0191996	-0.00596465	0.053439	-0.195795	-0.0632431	0.0932216	-0.0206033	-0.00080961	0.166384	0.235295	0.182399	-0.155532
F9X441	14.103	16.002	14.4353	16.2958	14.6721	15.5701	14.8991	16.3519	14.4103	14.1272	14.6943	15.9424	14.9341	14.6951	14.3983	16.2252	14.8401	14.8009	14.8992	16.0857	16.0478	15.1906	14.9691	16.3928	-0.172537	0.687556	-0.155695	0.205286	-0.0391217	0.08755	0.050372	0.126583	-0.0775896	-0.0659369	-0.220554	-0.371213	-0.0290462	-0.35041	-0.185012	0.0348603	0.0769651	-0.056585	0.19318	-0.161697	0.384294	0.00310293	0.163092	-0.127443	0.0353913
F9X446	13.7293	13.5077	13.5734	13.0197	14.2107	13.8067	13.8087	13.1932	14.3497	13.0611	13.7497	13.15	14.393	13.6704	13.5339	13.0676	14.205	13.1704	13.5204	13.0928	15.248	13.551	13.7055	13.373	-0.0675761	-0.203701	0.0497217	-0.00455689	-0.021926	-0.0728028	0.0271996	0.0340469	0.196286	0.0567057	0.197441	0.165836	-0.0914995	0.228025	0.0178702	-0.056509	-0.0795262	-0.0839699	-0.118328	-0.0883207	0.0630866	-0.0333867	-0.0331688	-0.0809463	-0.0354243
F9X454	12.8562	14.7369	12.7087	13.3235	13.0962	15.0799	13.0379	13.4301	13.2358	14.0929	12.8539	13.3036	13.5557	14.5272	12.9651	13.6442	13.2288	14.3851	12.8562	13.6369	14.3688	14.7456	13.0096	14.0285	0.0249975	-0.107871	-0.0716667	-0.112535	-0.170723	0.0670292	-0.000237569	-0.140791	-0.0618674	-0.0956514	0.0492389	0.0642624	0.0368837	-0.0486168	0.192382	0.108391	-0.0900333	-0.002621	-0.039121	0.0439813	0.149636	0.0278177	0.0142946	0.16282	-0.155411
F9X458	9.76197	8.62979	11.7251	13.1492	10.3549	9.24579	12.0544	13.1096	10.2022	7.05897	12.1111	13.111	10.7064	8.11322	11.5828	13.3018	10.5407	8.28388	11.9212	13.3776	10.9997	7.9644	11.8631	13.6206	-0.106624	0.163624	-0.0262706	-0.00398612	0.0506016	0.611539	0.0452788	-0.178415	0.0283005	0.190424	-0.0217201	-0.591115	0.15021	-0.0839875	-0.160961	0.0488124	0.184442	0.274712	0.0548133	0.0675807	-0.25691	-0.374774	-0.103284	0.0377075	0.181001
F9X485	10.493	13.3731	NaN	10.9566	11.415	13.7914	NaN	10.9996	11.3427	13.1734	NaN	11.1037	11.942	14.0449	NaN	11.1085	11.4733	13.7009	NaN	11.0406	11.5177	13.0866	NaN	11.1797	-0.311926	-0.405408	NaN	0.0169143	0.174403	-0.15526	NaN	-0.0748711	0.234572	NaN	0.18243	0.210925	0.449549	0.535322	NaN	0.068988	0.180743	0.379335	NaN	-0.0559061	-0.675198	-0.564914	NaN	-0.189697	0.24313
F9X486	14.4728	14.3991	14.7457	15.3231	14.7223	14.7264	14.9078	15.2914	14.8968	13.8396	14.8243	15.2643	15.0916	14.1916	14.6995	15.3165	14.6613	13.9035	14.5606	15.6867	16.0133	14.1558	15.0472	15.8663	0.0555435	-0.0536918	0.0731042	-0.00987633	-0.130719	0.105513	-0.0225675	-0.176347	0.00187099	-0.0175757	0.124108	0.202851	-0.0132826	0.00772386	0.0344616	-0.116228	-0.243618	-0.0923241	-0.227004	0.196876	0.207968	-0.170072	0.159582	0.103704	-0.0590256
F9X4A2	10.028	12.3671	NaN	10.8581	10.2613	12.9049	NaN	11.102	10.3767	12.2726	NaN	10.9127	11.4131	12.413	NaN	11.13	10.4436	12.1752	NaN	11.3601	11.2901	12.2596	NaN	11.1641	-0.0483407	-0.281762	NaN	-0.10465	-0.250831	0.0878944	NaN	0.00442738	0.0204614	NaN	-0.0550928	0.439786	0.649106	0.0330509	NaN	0.0674913	-0.120496	-0.0166592	NaN	0.240567	-0.174345	-0.26231	NaN	-0.228297	0.0767332
F9X4B2	15.6673	16.212	15.6307	16.2902	16.1269	16.4022	15.8441	16.3785	16.0239	15.6763	15.9334	16.2103	16.2324	16.231	15.6424	16.3525	16.0259	15.8455	15.9042	16.4531	16.7839	16.2241	15.8115	16.7078	0.0829564	-0.136698	-0.0387856	0.0165571	0.106886	-0.114535	-0.0831363	-0.029964	0.00723112	0.094646	0.0842505	0.143705	-0.0395282	0.151294	-0.0194124	-0.0209573	-0.0461239	-0.046179	0.119672	0.0226438	-0.18844	0.00241295	-0.0729834	0.00448927	0.0446379
F9X4B3	11.3737	6.38246	6.69919	12.6689	12.0391	7.56621	7.98863	12.8185	12.1786	NaN	8.70877	12.525	12.1602	6.39868	7.77729	12.9305	12.28	NaN	8.39288	12.7408	13.2965	7.04374	8.40246	13.2051	-0.288563	NaN	-1.17077	-0.0208024	-0.0589271	NaN	-0.139109	-0.00602425	-0.0942239	0.669545	0.160959	NaN	-0.189689	NaN	-0.0850541	0.141036	0.13007	NaN	0.407899	-0.105711	0.24615	NaN	0.317491	0.0857248	-0.709834
F9X4B7	15.1963	15.751	15.7866	15.3857	15.7386	15.8182	15.8085	15.7733	15.7232	15.6197	15.6842	15.6928	15.8534	15.6454	15.7681	15.7641	15.7863	16.1508	15.2448	16.1461	16.4107	16.182	15.6482	16.1416	-0.0293654	-0.360354	0.254731	-0.306467	0.0772026	-0.461246	0.0189426	-0.0536803	0.0711518	-0.0168848	0.14216	0.324499	-0.0599493	-0.196984	0.243907	-0.0278059	0.072971	0.496443	-0.40206	0.297052	-0.203018	0.197642	-0.0986358	0.0197496	-0.089298
F9X4C5	15.0247	17.06	15.8548	16.6119	15.6786	17.2567	16.0006	16.6865	15.6397	16.0964	15.9573	16.5959	15.9438	16.6527	15.7235	16.6047	15.659	16.4325	15.7525	16.7105	16.9272	16.9208	15.9972	17.0517	-0.228417	0.0733376	0.0987479	0.0268734	-0.0101995	0.101961	-0.0132508	-0.0334379	0.0813024	0.0319241	0.0311941	-0.0742078	0.00312993	-0.0650176	-0.0249501	-0.0801944	-0.0817652	-0.097183	-0.118574	-0.0314474	0.286058	0.06111	0.0261027	0.036904	-0.109908
F9X4D9	11.6944	13.212	9.54143	13.0414	11.9036	13.6872	9.91946	13.2913	11.737	12.9984	10.3568	12.9442	12.2821	13.4342	10.2486	13.2194	12.3161	13.1483	9.16466	13.2826	13.1987	13.3723	9.80071	13.7156	0.0647794	-0.346908	-0.172279	-0.082563	-0.16168	-0.0398278	-0.05202	0.0324931	-0.109241	0.473811	-0.247919	0.255618	-0.0350841	0.144296	0.542554	-0.00439386	0.198828	0.0464058	-0.664063	0.00172587	0.181075	-0.0595843	-0.128004	0.161979	-0.173109
F9X4F3	9.73791	12.3643	12.5126	11.823	10.2807	12.0854	12.8677	11.959	10.7693	11.1803	12.7975	11.991	10.9612	11.7052	12.728	11.9664	10.7853	11.5913	12.7692	11.8647	11.2218	12.3686	12.787	12.2412	-0.32903	0.231587	-0.106162	-0.026116	-0.222001	-0.215326	-0.00886356	-0.0249372	0.212447	0.00947971	0.346946	-0.13625	0.206615	-0.158523	0.116829	0.0174844	0.230675	-0.084389	0.0354506	-0.141293	-0.233205	0.362902	-0.0467338	-0.0375849	-0.0687747
F9X4F7	12.7753	13.865	13.9095	13.72	13.5069	13.711	14.2933	13.8268	13.3443	12.4138	13.96	13.654	13.6822	13.1164	13.7687	13.8855	13.4322	12.7298	14.0566	13.7239	14.6036	13.2178	14.1086	14.1026	-0.223075	0.439166	0.0183064	0.026332	0.0728737	0.117146	0.144342	-0.00169171	0.0307723	-0.100475	-0.00941575	-0.195918	-0.00371792	-0.0403914	-0.11489	0.0920156	-0.0538612	-0.238997	0.0503276	-0.126683	0.217196	-0.0810051	0.00238962	-0.0207453	0.0357234
F9X4H2	14.071	15.9438	15.1476	16.1752	14.5225	15.5436	15.4414	16.2088	14.4601	14.1286	15.3283	15.7998	15.0066	14.9066	15.1693	16.0259	14.8613	14.8107	15.6864	16.0704	15.8656	15.3824	15.5057	16.3593	-0.167762	0.57433	-0.107249	0.193771	-0.152004	0.00610322	-0.0712777	0.09248	-0.111129	-0.0959032	-0.134046	-0.424774	0.0802186	-0.193898	-0.077933	-0.0553851	0.134798	-0.101692	0.316541	-0.0679135	0.238795	0.13993	0.0358219	-0.0518234	0.0325916
F9X4H5	14.5018	15.9311	14.6813	15.672	14.7173	15.7454	14.9482	15.7397	14.6204	14.7054	14.8859	15.4292	15.0001	15.199	14.7185	15.6142	14.9439	15.133	14.8453	15.6865	15.7327	15.5984	15.01	15.9838	0.14153	0.295546	-0.0420151	0.109574	-0.0787238	-0.0582374	-0.0328523	0.0424245	-0.0627153	-0.00668698	-0.0952908	-0.114064	-0.0478277	-0.167572	0.00284413	-0.0480637	0.0959052	-0.0455273	0.00702059	-0.0328497	-0.0155933	0.0898547	0.0716896	-0.00836927	0.0917632
F9X4J7	12.864	13.8695	13.6684	14.2135	13.1731	14.0836	13.872	14.3025	13.2352	12.5771	13.7328	13.9852	13.5766	13.658	13.5419	14.1506	13.1843	13.3072	13.7002	14.1819	14.0838	13.7895	13.8809	14.3996	0.0702592	0.0718491	0.0606255	0.133034	-0.0563919	0.117916	0.00641097	0.0872073	-0.0247246	-0.0442784	0.0860577	-0.404508	0.0952202	0.129301	-0.0582525	-0.0296214	-0.0971474	-0.0334412	-0.0226067	-0.0553792	-0.0979978	0.118883	0.0581012	-0.110516	0.0918245
F9X4J8	12.9471	14.9524	14.1444	14.2827	13.5037	14.8453	14.4614	14.3632	13.5772	13.8848	14.2718	14.0668	13.6161	14.3156	14.0461	14.4556	13.5412	14.4157	14.4407	14.491	14.5433	14.7083	14.4927	14.6455	-0.115223	0.181844	-0.0402006	0.0236963	0.0056158	-0.0933207	0.0190206	-0.030624	-0.121762	-0.0821306	0.159449	-0.0696058	-0.133887	-0.185927	-0.130899	0.0967633	-0.00882585	0.102215	0.141106	0.0750882	0.0928704	0.0647936	0.0931041	-0.043162	-0.0393722
F9X4K1	15.9581	17.0783	16.513	16.2801	16.2342	17.5143	16.5675	16.4463	16.2186	16.6648	16.4596	16.4581	16.6352	17.1125	16.3404	16.515	16.2137	16.7066	16.0407	16.6632	17.4813	17.1242	16.6233	17.0327	0.0603095	-0.205338	0.213844	-0.160693	-0.0992711	0.0626021	0.0105935	-0.129309	0.0877988	-0.00883068	-0.0345649	0.197312	0.0498377	0.0978273	0.0488018	-0.0255775	-0.171811	-0.12003	-0.373512	0.0655184	0.1955	-0.0323736	0.109103	0.162263	-0.131593
F9X4L1	16.2446	16.245	16.0435	16.628	16.3602	16.5319	15.8735	16.7357	16.2465	15.6589	15.6785	16.5901	16.6371	16.0101	15.5763	16.6246	16.0855	15.583	15.4648	16.808	17.2074	16.127	15.8228	17.1144	0.340116	-0.0311271	0.42519	0.00296696	0.0200381	0.0877023	-0.00263384	-0.0241736	0.035616	-0.109076	-0.013366	0.198838	0.0449784	0.00289239	-0.0343708	-0.100248	-0.306674	-0.23613	-0.268572	0.0261263	-0.085093	-0.0221755	-0.0105378	0.0597124	0.19881
F9X4L4	12.5714	14.8896	12.8627	13.7038	12.7261	15.2375	12.9473	14.0672	12.7686	14.018	12.7694	13.78	13.1212	14.5827	12.5247	13.794	12.8226	14.43	12.6264	13.9724	13.6322	14.9008	12.9623	14.2007	0.190119	-0.0370335	0.205475	-0.0907819	-0.0909037	0.142805	0.0322948	0.137766	0.0559561	-0.0571233	0.031926	-0.0924692	0.0523305	-0.0749525	-0.124863	-0.100359	-0.0463806	-0.0395826	-0.14584	0.0210061	-0.137091	0.101233	0.0900561	-0.023587	0.0592921
F9X4L7	13.5921	13.7776	7.72117	12.7474	14.0189	13.8104	NaN	12.861	13.9647	12.8225	7.59738	12.4395	14.4221	13.5858	NaN	13.025	14.2093	13.2338	NaN	13.0894	15.1108	13.315	NaN	12.9982	-0.068463	0.103236	NaN	0.0124551	-0.0773936	-0.0320385	NaN	-0.00879277	-0.225009	NaN	-0.0512445	-0.0357866	0.0738857	0.180418	NaN	0.19021	0.061054	0.0164935	NaN	0.197577	0.0621615	-0.232322	NaN	-0.16644	0.127943
F9X4M1	14.9676	16.5929	14.9482	16.5312	15.3945	16.4838	15.2452	16.6669	15.4122	15.2827	15.2829	16.4405	15.8115	15.8718	15.1082	16.6848	15.8023	15.925	15.2214	16.6976	16.2319	16.2864	15.3473	16.9047	-0.0766307	0.268957	-0.119048	0.00198372	-0.0854515	-0.00818869	-0.0798724	0.00289451	-0.0181341	0.0463629	0.0125674	-0.225129	0.0796294	-0.183162	0.0484983	0.0558561	0.270325	0.0580731	0.0390677	0.0116047	-0.20044	0.0894492	0.0649918	-0.0542049	0.0438664
F9X4M2	9.49374	6.62499	9.80284	10.7894	9.34347	6.6737	10.2875	10.4618	9.07994	NaN	9.95262	10.5068	10.1421	NaN	9.96314	10.669	9.69547	6.57932	9.39926	10.4786	10.2507	6.04553	10.0221	10.7599	0.385242	NaN	0.0231735	0.303582	-0.200738	NaN	0.250041	-0.158841	0.0915213	0.00369297	-0.383932	NaN	0.346004	NaN	0.191096	0.0833944	0.099301	NaN	-0.495423	-0.164079	-0.245876	NaN	0.0274193	-0.155578	0.362011
F9X4N1	11.2192	12.3583	11.9841	11.4756	11.6204	12.6947	12.1497	11.6141	11.2649	11.3657	11.9747	11.8069	11.8882	12.1899	11.6537	11.7821	11.6797	12.0874	11.889	11.7713	12.3737	12.4592	12.1878	12.2661	0.103963	-0.0844198	0.13585	-0.185295	0.0694645	0.0839157	0.0436613	-0.181654	0.216492	-0.0427766	-0.205789	-0.260877	0.0852972	0.0161604	-0.186977	0.0213792	0.0767132	0.101683	-0.0742903	-0.0464604	-0.129649	0.143537	0.124532	0.175537	-0.0859647
F9X4N8	12.3697	13.4192	12.5781	12.6261	12.7977	13.3704	12.8526	12.8357	12.6363	12.2438	12.8834	12.5191	13.5687	12.9099	12.544	12.8985	13.4642	12.7718	12.999	13.2594	13.969	13.047	13.0054	13.0082	-0.205528	0.208638	-0.107452	-0.106666	-0.213197	-0.00819919	-0.0906844	-0.0319035	-0.143113	0.0286616	-0.294271	-0.150614	0.30588	-0.031622	-0.133899	0.0660134	0.401306	0.0182934	0.198517	0.369851	0.00580996	-0.0364959	0.104856	-0.154182	-0.032749
F9X4P3	17.7083	18.8852	17.903	18.8944	18.2531	18.8382	18.2144	18.9477	18.245	17.3982	17.9955	18.6464	18.5671	17.9394	17.801	18.8016	18.3256	17.8688	18.16	18.785	19.7171	18.4191	18.2485	19.1164	-0.202046	0.41024	-0.0258505	0.154272	-0.0928986	0.195127	0.0277993	0.0727076	-0.0232531	-0.10261	-0.0206604	-0.260673	-0.0307706	-0.266648	-0.120169	-0.0383265	-0.0724062	-0.149176	0.116134	-0.111968	0.418782	0.0711306	0.104695	-0.0534321	-0.0511401
F9X4R2	10.7554	8.25025	10.1927	11.6437	11.3038	9.67278	10.4983	11.8046	11.2595	NaN	10.1316	11.6439	11.5995	9.20198	9.65198	11.9669	11.4294	8.69919	9.66278	11.7156	12.3413	9.60929	9.96593	12.4459	-0.133683	NaN	0.300369	-0.101273	-0.0210098	NaN	0.348183	-0.0752582	-0.0305414	0.0700401	0.0150603	NaN	0.0228142	NaN	-0.232689	0.122153	0.0526585	NaN	-0.344532	-0.186276	0.06416	NaN	-0.141371	0.271196	-0.0428577
F9X4T2	12.3717	13.5956	12.0977	10.1741	12.8741	13.9306	12.4062	10.6671	12.6819	12.9782	11.9656	10.2621	12.9763	13.6924	11.9823	10.0708	12.6059	13.2652	11.8709	10.5525	13.7768	13.7656	12.1709	11.1755	0.0496311	-0.192501	0.140367	-0.184517	0.116315	-0.0255441	0.191088	0.173703	-0.0259688	-0.161067	0.00450122	0.00617391	-0.0333238	0.173251	0.0325314	-0.387568	-0.203867	-0.0658669	-0.20144	0.0370493	0.0667436	0.104487	-0.00147881	0.387302	-0.186018
F9X4T9	15.8344	17.4204	16.1312	17.6104	16.3689	17.4702	16.626	17.7485	16.2118	16.1268	16.5482	17.4984	16.5852	16.7173	16.4101	17.5847	16.6197	16.7112	16.571	17.6584	16.9733	17.0101	16.4283	17.9236	-0.0387313	0.260887	-0.196357	0.0648881	0.0600089	0.142679	0.0406485	0.0680705	0.0233736	0.0513834	-0.0167549	-0.216631	0.0244787	-0.173195	0.0901865	-0.0606524	0.258873	0.00867862	0.128369	-0.0440384	-0.287874	-0.0224185	-0.114231	-0.0516415	0.141713
F9X4U2	13.6264	15.0308	11.6657	13.9479	14.1658	15.2136	11.6947	14.1696	13.9944	14.0154	11.5876	13.861	14.5561	14.8164	11.5839	14.2644	14.4704	14.702	11.4219	14.2447	14.6159	14.8849	11.6169	14.7001	-0.0526945	0.00344631	0.195466	-0.124934	0.051042	0.0182041	-0.0332934	-0.0380722	-0.141349	-0.0518535	-0.0401109	-0.195845	0.18939	0.0579946	0.121324	0.0918061	0.30364	0.131667	-0.163331	0.0149581	-0.451266	-0.0154665	-0.0683131	0.197591	0.0896847
F9X4U4	9.58864	13.5783	9.72828	12.6306	10.1124	13.5805	10.4132	12.5295	10.4506	12.5669	10.0723	12.5714	10.4231	13.1444	10.2282	12.3779	10.4612	12.8546	10.3989	12.6567	11.0183	13.4668	10.1307	12.8151	-0.194674	0.12951	-0.308735	0.158854	-0.106593	-0.0363323	0.118418	-0.0771143	0.170172	-0.134012	0.311903	-0.0657685	-0.0478068	-0.0353801	0.198824	-0.193685	0.190182	-0.137123	0.246824	0.028081	-0.153011	0.145094	-0.121319	-0.0863088	0.000125134
F9X4W8	14.4426	14.9322	14.8512	13.3442	14.7	15.7016	14.9265	13.6868	14.6172	15.0813	14.7557	13.4486	14.9565	15.3812	14.6253	13.4222	14.5957	14.7563	14.1292	13.6462	16.0216	15.2567	14.7231	13.9421	0.11276	-0.502862	0.307596	-0.11243	-0.0656257	0.0984644	0.125139	0.0954023	0.0625511	0.0428365	-0.0679973	0.462375	-0.0610015	0.215134	0.0893044	-0.134182	-0.221871	-0.221728	-0.529378	0.0327758	0.303735	-0.0513829	-0.0354984	0.0558829	-0.116918
F9X4X0	16.1597	16.9677	15.758	16.994	16.7063	17.4092	15.8753	17.1188	16.5639	16.5664	15.8378	16.9084	16.7439	17.0005	15.6818	17.0613	16.5532	16.715	15.845	17.3468	17.5942	17.0035	15.8119	17.5629	-0.00145996	-0.2262	0.0812961	-0.0462433	0.109473	0.0472444	-0.0592241	-0.0563264	-0.0613428	-0.00820793	0.0474358	0.188615	-0.104862	0.0755899	0.0126891	-0.07877	-0.0956282	-0.0218431	0.0532434	0.149684	0.045041	-0.0634058	-0.0797966	0.0929988	-0.0468612
F9X4Y7	15.5726	16.2708	15.2466	15.1115	16.285	16.8198	15.8015	15.5317	16.2482	16.1389	15.8748	15.5193	16.658	16.8812	15.6248	15.8345	16.6053	16.7469	15.4999	15.5701	16.9222	16.4672	15.5147	15.8426	-0.250174	-0.533517	-0.222223	-0.331652	0.0264522	-0.15257	0.0749158	-0.046338	0.14662	0.236708	0.0699943	0.150671	0.147592	0.345877	0.163628	0.291525	0.294799	0.399619	-0.0838903	-0.0299193	-0.288663	-0.21008	-0.169138	-0.0302362	-0.159862
F9X514	14.1223	15.1859	12.8658	13.5775	14.7791	15.3277	13.4033	13.7587	14.7751	14.8546	13.5695	13.9104	14.8692	15.6607	13.2657	14.0076	14.7693	15.3535	13.2853	13.8968	15.8216	15.4051	13.3332	14.2737	-0.174699	-0.36216	-0.296378	-0.201468	0.0462918	-0.388434	-0.0167233	-0.15511	0.201853	0.238007	0.122678	0.122584	-0.115443	0.3816	0.111081	0.128835	-0.0153978	0.262418	0.00808918	-0.0390671	0.136571	-0.0160082	-0.0440764	0.0649575	-0.294037
F9X524	14.5143	14.8666	14.2658	13.3016	14.8019	15.2852	14.2779	13.4396	14.7175	14.3576	14.2496	13.4941	15.0374	14.8611	14.0422	13.4719	14.7474	14.5133	13.8123	13.6132	15.8643	14.9339	14.3734	14.022	0.126224	-0.186555	0.220469	-0.13033	-0.0218669	0.0640316	-0.0251262	-0.127238	0.132641	0.0350738	-0.0259188	0.120532	-0.0382921	0.0769876	0.00450002	-0.0598317	-0.128382	-0.0828061	-0.348028	0.0243853	0.0882359	0.00780946	0.113112	0.160373	-0.0849307
F9X534	NaN	12.2429	12.2325	12.8721	NaN	11.865	12.9117	13.1927	NaN	10.9593	12.7357	12.9572	NaN	11.4143	12.8027	13.0637	NaN	11.2694	13.3569	13.1991	NaN	11.8037	13.0112	13.4355	NaN	0.400354	-0.484387	-0.122837	NaN	-0.145665	-0.0629703	0.0629313	0.0327808	-0.15043	NaN	-0.0672162	NaN	-0.159359	0.0934499	-0.0310301	NaN	-0.116215	0.524983	0.0472465	NaN	0.088102	0.0793543	0.0109083	-0.128412
F9X536	8.78624	11.4272	9.21931	NaN	9.73446	11.6313	9.8112	NaN	9.75869	10.7832	9.47531	NaN	10.301	11.9297	10.3628	NaN	9.81965	11.8887	9.93496	NaN	10.8143	11.1912	9.42559	NaN	-0.523763	-0.298172	-0.360645	NaN	-0.0112633	-0.262194	-0.0265351	NaN	NaN	-0.273917	0.0933141	-0.126047	0.30343	0.47332	0.790482	NaN	0.0219759	0.620294	0.239986	NaN	0.116306	-0.407201	-0.36937	NaN	-0.174105
F9X552	13.6688	14.663	14.4145	15.26	14.2386	14.6518	14.9139	15.5045	14.2085	13.5314	14.8105	15.2749	14.5051	14.0047	14.6561	15.5851	14.4976	14.1792	15.0942	15.5196	15.2027	14.5176	14.9449	15.7251	-0.159026	0.154885	-0.266285	-0.0931272	-0.0249652	-0.0244183	-0.0246756	0.0166093	-0.00769706	-0.039566	0.0252861	-0.160646	-0.0102806	-0.234408	-0.0170068	0.132198	0.182125	0.128099	0.298416	0.00968683	-0.0131395	0.136488	0.0491179	-0.0576696	-0.119587
F9X554	10.8185	NaN	11.3648	12.2333	11.3541	NaN	11.6745	12.0405	11.2693	NaN	11.3037	12.0289	11.4308	NaN	11.5101	12.2594	11.0577	NaN	11.5599	12.2322	12.2766	NaN	11.4679	12.592	0.00974458	NaN	0.00960952	0.127348	0.109607	NaN	0.0614464	-0.20032	-0.00649385	-0.220835	0.105168	NaN	-0.0656009	NaN	0.162505	0.0537157	-0.238714	NaN	0.0896053	-0.0306186	0.0797946	NaN	-0.102331	0.0563695	0.0376229
F9X560	9.57473	12.4103	10.1134	11.8859	9.34713	11.9785	9.79964	11.8546	9.72286	11.1601	9.2906	11.8425	9.35597	11.5506	9.69096	11.3705	9.08664	11.4073	9.87675	11.9855	10.2518	11.9641	10.098	12.3885	0.577268	0.415054	0.426705	0.123117	-0.086042	-0.184913	-0.144784	-0.0430516	0.150205	-0.565318	0.370024	-0.0191415	-0.329099	-0.175776	0.0119309	-0.492076	-0.398494	-0.131017	0.0750864	0.0658191	-0.133657	0.0957943	0.19638	0.195988	0.29691
F9X5B7	9.91797	8.95504	7.68299	NaN	10.4825	9.35414	7.93681	NaN	10.3306	7.6111	8.45627	NaN	10.9499	8.46303	8.58823	NaN	10.6527	7.51467	6.08385	NaN	11.3696	8.01603	8.34589	NaN	-0.140165	0.385875	-0.0411081	NaN	-0.0113464	0.616893	-0.0450622	NaN	NaN	0.562904	-0.0829289	-0.141977	0.204157	0.16283	0.871745	NaN	0.106856	-0.597483	-1.75526	NaN	-0.0765728	-0.426139	0.406785	NaN	0.100176
F9X5F9	15.9102	17.1555	16.4941	17.2101	16.4682	17.1401	16.7385	17.286	16.4665	15.9416	16.6241	16.996	16.8035	16.46	16.4262	17.1946	16.7252	16.4336	16.6925	17.2382	17.5006	16.8756	16.7382	17.4701	-0.176419	0.237624	8.21576e-05	0.102714	-0.0541165	0.0541425	-0.0133361	0.0437722	-0.0408703	-0.0391518	0.0245057	-0.160176	0.029225	-0.188933	-0.060205	-0.0125745	0.150889	-0.0273256	0.0834425	-0.0260642	0.025916	0.0846685	0.0291683	-0.0669772	0.0228064
F9X5G0	13.187	16.5687	15.5754	16.0922	13.9151	16.5672	15.8483	16.153	13.8432	15.3062	15.8274	15.8973	14.2299	15.7756	15.6349	16.0364	14.0878	15.8626	15.8961	16.0702	15.2989	16.2868	15.9811	16.3495	-0.347599	0.257369	-0.0935979	0.117575	-0.0551663	0.0877713	-0.0784298	0.0434732	-0.00685894	-0.0107835	-0.0467222	-0.189052	0.00768071	-0.266748	-0.0264437	-0.0380485	0.0655372	0.00825058	0.112099	-0.0613192	0.376269	0.102409	0.0971561	-0.0548212	-0.146817
F9X5G3	13.2046	13.971	12.0272	13.9517	13.5638	14.4795	12.3107	13.9454	13.6842	13.7186	12.3763	13.8154	13.8206	14.309	12.4776	13.9195	13.3129	13.7166	12.3208	14.0549	13.8534	14.1428	12.2678	14.592	0.190389	-0.335411	-0.144605	0.030363	0.113907	0.00496772	-0.118897	-0.110864	-0.0354882	0.0352024	0.314658	0.228314	0.118802	0.271525	0.313406	-0.101653	-0.18896	-0.132803	0.0339382	-0.0232923	-0.548796	-0.0365927	-0.119044	0.240934	0.0510587
F9X5I1	11.9835	11.9485	12.5997	NaN	12.0893	12.444	12.8336	NaN	12.0279	11.7726	12.5311	NaN	12.6144	12.3245	12.7328	NaN	12.0224	11.7364	12.8749	NaN	12.9879	12.163	12.8518	NaN	0.254974	-0.36649	-0.012691	NaN	-0.0749497	-0.0391059	-0.0366102	NaN	NaN	-0.250546	-0.0559178	0.27373	0.198319	0.278447	0.128027	NaN	-0.193792	-0.121595	0.147454	NaN	-0.128634	-0.024985	0.0243659	NaN	0.00168191
F9X5I2	8.36527	10.0035	10.0406	11.7224	8.77462	10.6266	10.0673	11.9027	8.07543	10.3406	10.0391	11.7115	8.13232	10.5978	10.4408	11.7135	9.1878	10.246	9.60225	11.6915	10.0639	10.2076	9.94293	12.3949	0.15778	-0.583676	0.143326	-0.00859173	0.131411	-0.128655	-0.0877122	0.0368652	0.0509852	-0.0274474	-0.487443	0.569523	-0.762782	0.27954	0.551148	-0.117248	0.492628	0.11584	-0.409997	-0.196305	0.468405	-0.252573	-0.169317	0.234295	-0.142993
F9X5J2	7.39686	13.4041	9.96054	9.14667	8.73145	13.7656	9.91501	9.69818	8.28031	12.6762	9.81678	9.93718	7.88099	13.1148	10.1539	9.979	8.11894	12.8794	9.33291	10.0211	8.69003	13.2562	10.3121	10.1826	-0.227167	-0.0288081	0.170235	-0.555685	0.671708	0.16463	-0.133064	-0.139011	0.305333	-0.142793	0.300902	0.0593805	-0.430646	-0.0490927	0.371249	0.176849	0.00723577	-0.0964301	-0.572407	0.161905	-0.322032	-0.0496798	0.306781	0.0506091	-0.156776
F9X5J3	NaN	11.829	7.26622	11.2227	NaN	11.8217	8.40071	11.0883	NaN	10.9582	6.51625	10.9551	NaN	11.5632	6.88166	11.4933	NaN	11.6359	7.76155	11.3911	NaN	11.837	8.14893	11.4459	NaN	-0.0286505	-0.104758	0.0817872	NaN	-0.204087	0.771951	-0.187529	-0.115373	-1.024	NaN	-0.0833805	NaN	-0.0255025	-0.481698	0.252516	NaN	0.235247	0.275555	0.0932773	NaN	0.106374	0.562947	-0.12468	-0.198754
F9X5J4	12.2473	13.0719	12.3764	13.0921	12.9857	13.332	12.5362	13.3678	12.5756	12.406	12.6893	13.2423	12.9425	13.0023	12.4417	13.1747	12.8732	12.7427	12.4826	13.4239	13.478	12.9652	12.3025	13.6192	-0.0440012	-0.0982745	0.0298862	-0.102788	0.258675	-0.00625101	-0.0681373	0.0380849	0.117902	0.173539	-0.071096	0.051902	-0.0364371	0.101095	0.102782	-0.119953	0.0941915	0.0295304	0.0210053	0.0721447	-0.201332	-0.0780018	-0.259075	-0.00539032	0.0821554
F9X5K0	10.8588	11.1739	12.1281	12.4167	11.2161	11.5253	12.4569	12.5997	11.0142	10.4618	12.5235	12.6374	11.8035	10.661	12.2374	12.5839	11.7547	10.9962	12.2446	12.7992	12.4696	11.0538	12.3922	12.9566	-0.101605	-0.0549008	-0.0774532	-0.123766	-0.180021	0.128415	-0.00643216	-0.0755935	0.16742	0.148696	-0.301588	0.0490473	0.155475	-0.298891	0.0394924	-0.0563443	0.306602	0.22437	-0.0759581	0.101864	0.121137	-0.0480406	-0.0283446	-0.013579	-0.0972247
F9X5L0	12.3059	13.8403	12.4079	13.7502	13.4822	13.9276	13.4221	14.1818	13.3348	13.1176	13.4207	14.0446	13.7635	13.8421	13.0828	14.438	13.696	13.743	13.2889	13.8123	13.8573	13.6701	12.8267	14.0711	-0.541635	-0.0999943	-0.542013	-0.174363	0.198905	-0.180769	0.214346	0.122388	0.190525	0.30154	0.131902	-0.00656432	0.228361	0.170736	0.140441	0.413675	0.360758	0.259772	0.223908	-0.269127	-0.37829	-0.14318	-0.338222	-0.283097	-0.0538037
F9X5M5	14.4272	15.5837	14.6272	15.0881	14.5778	15.2407	14.9365	15.341	14.6043	14.1007	14.7014	14.8812	14.796	14.5402	14.5774	15.2303	14.9354	14.7835	14.677	15.3004	15.0746	15.138	14.9449	15.5956	0.250364	0.435731	0.00807681	-0.0261921	-0.0346952	-0.0753336	0.0595999	0.0918413	-0.16265	-0.0870768	0.0720689	-0.231136	-0.0683877	-0.338819	-0.0341821	0.0162123	0.270946	0.0924964	-0.0571816	0.0291766	-0.490296	0.11706	0.110764	0.0516114	0.21971
F9X5N6	10.257	13.5296	12.637	8.39227	9.03315	13.1144	12.6795	7.82629	10.7873	12.1334	12.5133	8.61648	9.63216	12.7964	12.5682	7.88124	9.66764	12.9773	12.7333	8.61243	10.5712	13.2887	12.9549	9.19394	0.824687	0.306102	0.0808825	0.0969431	-0.834918	-0.277172	-0.134444	-0.603876	0.391649	-0.212109	0.999608	-0.273963	-0.487797	-0.158126	0.0197103	-0.513886	-0.252381	0.21089	0.0621501	0.160236	-0.2492	0.192269	0.18381	0.468934	0.1782
F9X5N7	8.36067	8.73833	12.2955	10.0908	8.34038	9.76653	12.4319	10.8756	8.35997	7.54303	12.5919	10.273	8.32571	8.55444	12.7164	10.6327	8.13391	9.12585	12.9328	10.6199	9.81043	9.4814	12.7253	10.8764	0.364562	-0.380095	-0.195264	-0.345498	-0.0914438	0.480023	-0.316576	0.304486	-0.0927856	-0.0680868	0.00848345	-0.759304	-0.358008	-0.295028	0.233272	0.0966602	-0.349873	0.464435	0.327074	0.0267234	0.42628	0.489969	0.0195806	0.0104143	-0.375635
F9X5P1	8.67175	9.38578	10.3144	9.58242	8.82769	9.23967	8.9134	10.2071	8.76079	6.28965	9.83066	9.66986	9.99718	6.48631	9.6248	9.99661	8.91949	7.89524	9.5561	9.60285	10.2371	9.23766	9.10533	10.4057	-0.00484216	1.04656	0.881822	-0.203225	-0.284622	0.732374	-0.776911	0.286648	-0.0452831	0.228858	-0.271185	-1.23348	0.632975	-1.58394	0.199882	0.111174	-0.244783	0.0130343	0.00855585	-0.33966	0.172458	1.02545	-0.542207	0.190346	0.218568
F9X5P3	10.1285	11.9748	10.6814	12.8277	10.2447	11.679	11.1387	13.0672	10.0267	10.6277	10.9538	12.6441	10.9073	11.4303	10.8131	12.9921	10.3391	11.5565	10.8916	13.1637	11.5674	11.7243	11.2878	13.2578	0.151969	0.225884	-0.154739	-0.0392649	-0.167539	-0.23801	0.0447929	0.0653417	-0.152352	-0.0515852	-0.305255	-0.30512	0.243117	-0.0496678	-0.0154723	0.0253125	-0.125147	0.26454	-0.0596099	0.139854	0.202856	0.102373	0.236613	-0.0388921	-0.0797751
F9X5R6	7.28965	12.7552	11.8799	11.1829	7.91916	13.04	12.2245	12.0451	9.09273	12.5016	11.9919	12.1457	9.31236	12.9498	12.0346	12.5541	9.08058	13.3485	11.7507	12.7162	7.75776	12.2652	11.9027	11.9225	-0.559986	-0.305047	0.0407552	-0.786424	-0.366194	-0.188271	0.127636	-0.0590768	0.246932	-0.0165241	0.887718	0.257522	0.775115	0.158546	0.203079	0.485027	0.743264	0.745253	-0.203483	0.590025	-1.47992	-0.668003	-0.151463	-0.476483	0.291291
F9X5R9	13.153	13.7315	12.911	14.489	13.2783	13.64	13.3978	14.7092	13.2075	12.6758	13.271	14.3673	13.4342	13.2044	13.1379	14.4136	13.2958	13.0072	13.4232	14.5305	14.3233	13.4138	13.2598	14.6716	0.2634	0.202572	-0.197531	0.083871	-0.0470585	-0.0570221	0.0314851	0.169308	0.032754	-0.00684752	-0.0374728	-0.0370676	-0.143001	-0.0555492	0.0369596	-0.0912625	-0.0815378	-0.064732	0.199685	-0.03149	0.0456702	0.0117987	-0.0637515	-0.16318	0.130444
F9X5S5	11.2115	9.67096	7.34012	11.1558	11.8351	10.2184	7.96503	11.5635	11.1087	9.51975	8.09803	9.61285	11.3256	10.4478	8.92475	11.3707	11.2548	9.03598	8.03199	11.2922	11.581	8.14001	7.3497	11.3282	0.384421	-0.0846967	-0.486581	0.227008	0.572343	0.294706	-0.119439	0.499933	-1.2454	0.102068	-0.073763	0.580189	-0.189008	0.961113	1.10567	0.342138	-0.0599266	-0.262667	0.0902791	0.20659	-0.634066	-1.48865	-0.692002	-0.0302666	0.721283
F9X5S6	14.9557	15.6845	15.3359	15.7423	15.3208	16.0609	15.5745	15.9655	15.2035	15.1793	15.497	15.7922	15.614	15.6456	15.3724	15.8915	15.4438	15.2721	15.4273	15.8687	16.6809	15.6819	15.5767	16.2615	-0.0216507	-0.153031	-0.00318545	-0.0528274	-0.0922992	0.0552861	-0.0223038	0.0355124	0.0674986	-0.0113506	-0.12926	0.157815	-0.0509928	0.0770302	0.0409795	-0.00350217	-0.0212697	-0.108434	-0.026732	-0.0833667	0.315472	-0.028666	0.0225924	0.0366853	-0.144195
F9X5S9	13.7835	13.2706	13.5807	13.7605	14.322	13.5716	13.8301	13.9077	14.2014	12.9254	13.7399	13.6823	14.7164	13.4473	13.6832	13.8837	14.4029	13.0416	13.4318	14.0744	15.2509	13.3187	13.8848	14.1321	-0.103591	-0.24206	0.0138782	-0.0211723	-0.000821665	-0.109154	0.00549337	-0.00878784	-0.0288427	0.00376942	-0.0411198	0.228752	0.14168	0.203596	0.123983	0.00221781	0.0281003	-0.0141091	-0.250106	0.13585	-0.0242476	-0.0670254	0.102982	-0.0792645	-0.0713475
F9X5T1	14.2123	15.8805	15.7734	15.9297	14.4096	16.2768	16.1368	16.2157	14.2675	15.5594	15.9175	16.227	14.7509	16.1237	15.9842	16.3785	14.5212	15.7685	16.0141	16.8674	15.2507	15.7465	15.8239	16.4464	0.202637	-0.262275	-0.0433471	-0.289257	-0.0357605	-0.0340098	0.0622666	-0.138155	0.0784816	-0.0685229	-0.0974896	0.232753	0.0536759	0.249955	0.175091	0.0597059	0.0238621	0.0828092	0.0823469	0.491515	-0.146925	-0.269232	-0.207835	-0.202291	0.10851
F9X5T5	14.8192	15.7064	14.4788	14.9003	15.153	16.034	14.7245	15.1707	15.1628	15.4554	14.6535	14.9885	15.5363	15.8408	14.5016	15.2132	15.2927	15.5433	14.6157	15.304	16.2619	15.8238	14.6139	15.3554	0.00732034	-0.277713	0.0056788	-0.129973	-0.0946716	-0.118223	-0.00635095	0.00560342	0.0287424	0.0111607	-0.00446332	0.287379	0.0367579	0.125686	0.0361185	0.0832003	-0.00687081	0.0162085	0.0275834	0.116911	0.0619275	-0.0333384	-0.0741904	-0.104484	-0.0611504
F9X5V0	12.297	13.0022	11.287	12.4408	12.8012	13.7472	12.2688	12.7428	12.3764	12.8671	11.1779	12.5031	12.887	13.1554	11.1259	12.3277	12.4648	12.8285	10.2353	12.1694	14.002	13.1577	11.4173	13.0703	0.0513278	-0.374295	0.159842	0.0235209	0.119798	0.202638	0.883882	0.190731	0.156342	-0.118467	-0.224652	0.306704	-0.0462431	0.0477874	0.00643073	-0.189315	-0.268572	-0.0910293	-1.00684	-0.404679	0.368341	-0.0918053	0.0751484	0.223399	-0.178672
F9X5W5	8.35597	12.7115	NaN	11.3085	9.59193	12.863	NaN	11.4329	8.55186	11.6657	NaN	11.3094	10.1062	12.2909	NaN	11.2436	10.0186	12.3192	NaN	11.4344	10.4479	12.5224	NaN	11.3985	-0.597039	0.0658227	NaN	0.0790659	0.203207	0.0493333	NaN	0.0686241	0.150482	NaN	-0.756521	-0.163805	0.465555	-0.0857276	NaN	-0.0856448	0.577934	0.130598	NaN	0.0480651	0.106865	0.00377797	NaN	-0.260592	-0.100734
F9X5Y1	12.3435	13.3183	NaN	11.2566	12.5795	13.3082	NaN	11.562	12.3743	12.9068	NaN	11.3219	12.9815	13.1988	NaN	11.3931	13.0358	13.1331	NaN	11.4346	13.4325	13.0911	NaN	11.4361	0.111371	-0.0912658	NaN	-0.01904	-0.0883586	-0.269411	NaN	0.151563	0.116776	NaN	-0.213246	0.313341	0.0618011	0.0582179	NaN	0.0176748	0.316049	0.180591	NaN	0.00216806	-0.187616	-0.191474	NaN	-0.269141	0.216432
F9X5Y9	12.504	12.9905	12.5931	14.5509	13.0893	12.8286	13.0678	14.7827	12.8517	11.576	13.0834	14.4832	13.3061	12.344	12.7389	14.6936	13.1299	12.4119	12.9413	14.7681	14.3845	12.787	13.0066	15.0524	-0.147886	0.250641	-0.187173	-0.0458365	0.00176359	-0.0792845	0.0297523	0.0511484	-0.0429488	0.133837	-0.155502	-0.347734	-0.0333832	-0.126856	-0.0337878	-0.00289897	-0.00963393	0.129026	0.0460484	0.0145189	0.344641	0.174208	0.0113236	0.026017	-0.171611
F9X604	11.9046	12.2901	11.6687	11.989	12.2739	12.6037	12.3447	12.8206	12.116	11.9692	12.5636	12.6425	12.5363	12.6964	12.3422	12.5006	12.7232	12.5238	12.0351	12.8792	12.495	12.6598	12.3662	12.665	0.122143	-0.417237	-0.426472	-0.468731	0.0558061	-0.271721	-0.00821474	0.228058	0.255287	0.29918	-0.021838	0.0779468	0.0662459	0.258007	0.254654	-0.0568736	0.453141	0.273525	-0.175119	0.264681	-0.675498	0.0794794	0.0559734	-0.22242	-0.106958
F9X612	13.8976	14.2639	13.6395	14.428	14.3703	14.6751	13.7794	14.4578	14.3747	13.7738	13.6886	14.348	14.6508	14.1551	13.5731	14.4303	14.5214	13.9467	13.6208	14.6777	15.23	14.2889	13.6579	14.8235	-0.0508305	-0.170147	0.104499	0.0255319	-0.0137644	0.0729167	-0.0133182	-0.0794448	0.016038	-0.015642	0.0709307	0.15577	0.0148256	-0.0099811	0.0457204	-0.0719048	0.085285	-0.0303457	-0.0291761	0.118427	-0.106446	-0.0182128	-0.092083	-0.00864697	0.0336106
F9X621	10.5209	12.3177	9.80909	10.7196	10.4607	11.9586	9.52908	10.6598	10.9682	11.2093	9.809	10.1668	10.7795	11.4566	9.5015	11.22	11.1538	11.7302	9.67687	10.752	11.4692	12.0091	9.62027	11.0645	0.187938	0.287268	0.276363	0.0809575	-0.308034	-0.239928	-0.261425	-0.113709	-0.401391	0.107001	0.279883	-0.004978	-0.241111	-0.304878	-0.0236103	0.481536	0.333153	0.156823	0.0291311	-0.0435005	-0.251829	0.105692	-0.12746	-0.0038929	0.277504
F9X640	14.6662	15.1764	14.3082	13.7645	15.1586	16.0221	14.1845	13.7125	15.0354	15.0202	14.3287	13.7183	15.4896	15.5352	13.9371	13.8714	15.0955	14.9377	13.7091	13.7938	16.7876	15.2996	14.1978	14.4122	-0.146862	-0.405586	0.322209	0.0107715	-0.0901546	0.271951	-0.059274	-0.175997	0.0351398	0.173492	-0.133104	0.254213	-0.011097	0.222174	-0.0412702	0.0179472	-0.205283	-0.187284	-0.391918	-0.116737	0.5865	-0.155469	-0.00323881	0.228876	-0.219034
F9X645	17.0602	17.7505	17.2653	17.3448	17.3218	17.967	17.2912	17.3721	17.2709	16.9572	17.2381	17.2829	17.5191	17.3499	16.9936	17.324	17.1829	17.0858	16.9444	17.3428	18.343	17.6854	17.3725	17.8975	0.169659	0.0343619	0.205983	0.0425623	-0.00453908	0.0828196	-0.0258321	-0.0649769	0.0511767	0.00953804	0.0249841	0.0571599	-0.0591142	-0.0972413	-0.0580831	-0.0780057	-0.195331	-0.173354	-0.22986	-0.116291	0.0643411	0.0962539	0.0982534	0.165535	0.00704595
F9X691	11.3901	11.138	12.1622	11.6755	11.9824	11.301	12.6643	11.7462	12.0409	9.81804	12.4019	11.476	12.1441	10.7871	12.1822	11.9149	12.0215	10.7936	12.1945	11.7966	13.1118	11.0901	12.6049	12.0617	-0.165995	0.0664845	-0.0812206	0.0220896	-0.00938741	0.0614898	0.163093	-0.0420431	-0.10684	-0.0108231	0.129439	-0.437339	-0.0995174	-0.0154199	-0.0535953	0.161772	-0.0222669	0.179142	-0.163926	-0.0135928	0.167727	0.145643	0.146472	-0.0213857	-0.149274
F9X6A6	14.373	15.4043	13.7405	14.3086	14.7273	16.1815	13.4848	14.5251	14.6634	15.3489	13.4329	14.4636	14.9758	15.666	13.1038	14.4682	14.4398	15.2332	12.815	14.5661	15.9786	15.6144	13.6921	15.0434	0.0724379	-0.420596	0.487228	-0.128768	-0.00899958	0.188528	-0.0262417	-0.0471381	0.0967026	0.0103768	0.00745158	0.340117	-0.0124138	0.110063	-0.141858	-0.0690037	-0.348474	-0.134658	-0.553281	-0.0281359	0.289998	-0.0834535	0.223776	0.176343	-0.14909
F9X6B1	NaN	11.4656	9.91012	9.99887	NaN	11.7393	9.90988	10.0253	NaN	11.3179	9.42691	9.70544	NaN	11.2723	9.77735	10.2661	NaN	11.0995	7.50239	10.1828	NaN	11.7364	8.49065	10.4476	NaN	-0.223094	0.865473	0.0196423	NaN	-0.117468	0.607458	-0.0887914	-0.203282	0.213004	NaN	0.44535	NaN	-0.14742	0.740329	0.187062	NaN	-0.132108	-1.65726	0.0466783	NaN	0.174739	-0.769	0.0386909	0.405864
F9X6B2	10.8591	13.1518	NaN	11.2312	11.1438	13.519	NaN	11.1672	11.0709	12.898	NaN	11.3072	11.1954	13.0384	NaN	11.3642	11.1608	12.7085	NaN	11.2205	11.8951	13.1867	NaN	11.9141	0.197365	-0.182091	NaN	-0.0110719	0.0463291	0.0170245	NaN	-0.209964	0.135413	NaN	0.0537013	0.380189	-0.154018	-0.0265676	NaN	0.0221601	0.0113587	-0.168385	NaN	-0.178652	-0.154736	-0.0201699	NaN	0.242115	-0.0210025
F9X6C1	10.5433	10.6377	9.10745	12.446	11.1754	10.2029	10.1308	11.9198	10.8986	8.77413	9.61289	12.385	11.0467	8.8805	8.96921	12.1073	11.1154	9.3351	8.591	12.2226	12.3488	9.72262	9.00568	12.1393	-0.0856387	0.795396	-0.00381805	0.367792	0.110683	0.192461	0.761783	-0.29325	0.3773	0.332351	-0.0857351	-0.252098	-0.269855	-0.692853	-0.134437	-0.0707459	-0.00126862	-0.0502085	-0.635285	-0.0125098	0.331814	0.00730211	-0.320594	-0.368587	0.355949
F9X6D6	13.907	13.8424	13.7244	13.4393	14.0228	14.1926	13.5854	13.7089	13.8729	13.7082	13.7617	13.4147	14.107	13.9371	13.2167	13.6653	14.102	13.6858	13.3864	13.9035	14.9839	13.8978	13.6191	13.9823	0.30014	-0.285123	0.300366	-0.121243	-0.0197618	-0.102953	-0.0963835	0.0134747	-0.075363	0.168348	-0.089353	0.396838	-0.187482	0.0785857	-0.199705	0.00499014	0.00745401	0.0153772	-0.152653	0.186093	-0.0109974	-0.102725	-0.0199721	-0.00795156	0.0839464
F9X6D7	12.5559	14.2486	12.0683	12.0542	12.9838	14.6488	12.1936	11.5256	12.6875	13.9734	12.1432	11.6824	13.2335	14.1451	11.9318	11.8182	13.0767	14.0192	12.1723	11.526	13.7784	14.3569	12.0432	12.3819	0.0623229	-0.233591	0.101138	0.347928	0.0544805	-0.00146085	-0.031324	-0.31549	0.0466601	0.00675745	-0.16143	0.307332	0.0523451	-0.0680889	-0.0277455	0.0121222	0.095494	-0.00593597	0.0901519	-0.337167	-0.103212	0.00174521	-0.138977	0.245947	0.0680737
F9X6E0	8.22949	7.28448	8.05382	NaN	7.98465	8.26219	10.2167	NaN	9.30033	7.64868	9.48734	NaN	9.62006	9.0863	9.17861	NaN	7.99169	7.08842	9.62534	NaN	9.92742	9.39455	9.28776	NaN	-0.053711	-1.09312	-1.12955	NaN	-0.734276	-0.283489	0.775608	NaN	NaN	0.134709	0.66175	0.0871736	0.649243	0.977659	0.0028713	NaN	-0.779188	-0.832173	0.326966	NaN	0.256182	1.14395	-0.11061	NaN	-1.18863
F9X6J0	8.49741	13.372	9.78625	11.9748	9.31644	13.4708	10.1292	12.1275	8.33807	12.4047	9.82466	11.972	9.76143	12.9943	9.75586	12.1065	9.6425	12.885	9.98142	12.2195	10.6803	13.0557	10.0715	12.4484	-0.316206	0.091474	-0.0136417	-0.0415021	0.0671022	0.02213	0.0714851	-0.023675	0.0262049	-0.144504	-0.830927	-0.0598223	0.260207	-0.0173126	-0.036419	-0.00967387	0.341207	0.0613847	0.0665162	0.0462963	0.478617	-0.0978538	0.0565631	0.0023497	-0.179888
F9X6L0	12.7404	13.8742	13.3299	14.7773	13.1148	13.6332	13.5053	14.7947	13.1391	12.7101	13.4872	14.611	13.6505	13.1839	13.1411	14.8214	13.648	13.229	13.4977	14.7931	14.3446	13.6322	13.5331	15.1468	-0.140111	0.24694	0.0391125	0.0783169	-0.201434	-0.162133	-0.0432821	-0.0390565	-0.0174072	0.0271232	-0.0967706	-0.10111	0.0823997	-0.174398	-0.142102	0.0226961	0.279862	0.058777	0.0918904	-0.0627007	0.0760542	0.131924	0.0272584	0.0181515	-0.00728253
F9X6M9	13.3376	15.0146	13.7389	14.3209	13.8544	15.0299	14.0797	14.4573	13.6984	13.8821	13.932	14.3538	14.0228	14.5195	13.7552	14.3246	13.6787	14.2702	13.8232	14.4766	15.0103	14.7151	14.0002	14.729	-0.037002	0.192582	-0.0243648	0.00230034	0.044039	0.0397612	0.0586591	0.00384246	0.105702	-0.000537053	-0.0316205	-0.123889	-0.0394314	-0.0336351	-0.000480711	-0.0937601	-0.183591	-0.0948189	-0.0551469	0.0011276	0.247606	0.02	0.0218703	-0.0192127	-0.0341869
F9X6N5	13.4773	14.1882	12.1748	13.9229	14.1144	14.3945	12.5756	14.17	13.9044	13.7134	12.3771	14.0515	14.1179	14.2154	12.465	13.9766	13.9684	13.8151	12.5556	14.0768	14.9682	14.1212	12.6898	14.4587	-0.0554205	-0.136592	-0.173302	-0.0614224	0.146002	-0.0983467	-0.0302834	0.0508785	0.137685	-0.140207	0.0163034	0.204681	-0.102395	0.159548	0.124579	-0.107512	-0.0519524	-0.0527043	0.0925105	-0.064328	0.0474626	-0.0765869	0.126703	0.0446995	-0.142254
F9X6N6	11.5264	12.9895	12.8668	13.0344	11.8416	13.5625	13.1615	13.0268	11.7837	12.2703	12.9957	13.0387	12.1176	12.9706	12.9603	13.3325	12.1372	12.6979	13.0132	13.2052	12.9442	13.0314	13.1808	13.8263	0.0270285	-0.181012	-0.0379647	-0.0844398	-0.0934886	0.223886	-0.00111099	-0.226917	-0.00960696	-0.078386	-0.071055	-0.0841576	-0.0693713	0.0690574	0.0631489	0.113805	0.150133	-0.0156488	-0.00664731	-0.0705521	0.0567533	-0.0121247	0.06096	0.277711	-0.164922
F9X6P3	11.6274	10.5703	12.2783	12.0594	11.9982	11.4811	12.0099	11.7537	11.8215	10.4781	12.2603	11.5679	12.3304	11.2646	11.9889	11.7892	11.6377	10.5994	11.9975	11.8078	12.9985	10.5851	12.2674	12.128	0.117568	-0.509585	0.269531	0.333501	0.0525739	0.233097	-0.256713	-0.106998	-0.0875106	0.0822629	-0.0437955	0.214236	0.132929	0.453665	-0.0123206	-0.036502	-0.359885	-0.0235532	-0.126354	-0.0748979	0.100609	-0.367861	0.0435941	-0.0275931	0.115567
F9X6P5	14.472	15.6449	15.79	15.1047	14.8498	16.0019	15.8143	15.2547	14.7423	14.9897	15.7642	14.9093	15.1812	15.5775	15.5242	15.1058	14.8664	15.2398	15.5956	15.0892	15.9223	15.6254	15.8048	15.4858	0.0253968	-0.118442	0.199362	0.0715946	-0.0324697	0.0704864	-0.0340719	0.0866932	-0.053291	0.00437962	-0.0597149	0.0424263	0.0470247	0.083081	-0.0588098	-0.0271333	-0.0678635	-0.0665762	-0.110011	-0.100825	0.0876266	-0.0109757	-0.000848584	0.022961	0.019787
F9X6P7	13.8815	14.3892	13.7786	14.011	14.1901	14.6132	13.9484	14.095	14.1216	13.4791	13.9225	13.9159	14.5624	14.0736	13.7965	14.0803	14.3203	13.8013	13.7463	14.2478	15.5193	14.3065	14.0474	14.49	0.00802594	0.0285063	0.0302167	-0.00390776	-0.119056	0.0844771	-0.0577809	-0.0547271	-0.0284878	0.004852	-0.107232	-0.0654168	0.00128204	-0.018054	0.0557935	-0.0343469	-0.0408409	-0.102344	-0.117082	0.0760476	0.257822	0.0728316	0.0840011	0.0454219	-0.0993087
F9X6R2	7.86685	13.2824	11.5273	11.3278	6.70376	13.4001	11.9649	11.6138	7.64097	12.4913	11.6562	11.1346	8.99013	12.6961	11.3748	11.6349	6.61419	12.3028	11.9675	11.6527	9.34787	12.7695	11.6212	11.5778	0.565287	0.208527	-0.0330687	-0.0373544	-1.03351	0.15816	0.146708	0.113865	-0.16007	-0.0735081	-0.0159672	0.233528	1.00096	-0.108822	-0.178011	0.169934	-1.17504	-0.31402	0.292102	0.130677	0.658269	-0.177374	-0.154222	-0.217051	0.148442
F9X6R5	11.4662	11.7857	12.331	12.5925	11.7465	11.7093	12.3483	12.6755	11.6402	10.7728	12.2718	12.4269	11.8555	11.3545	12.0064	12.5566	11.6744	11.024	12.364	12.811	12.5035	11.342	12.6327	13.1636	0.210859	0.204187	0.130206	0.0132841	0.0554752	-0.0402918	-0.110312	-0.03861	-0.0818697	-0.0982771	0.0295479	0.00734597	-0.0873987	0.0418781	-0.186779	-0.122433	-0.0686285	-0.100584	0.0482163	0.0749318	-0.139854	-0.112536	0.216946	0.154697	0.109821
F9X6R8	NaN	11.9013	11.369	11.7763	NaN	11.8795	11.3069	11.7393	NaN	10.7561	11.3935	11.3271	NaN	12.0555	11.1834	11.8687	NaN	11.3613	11.7694	11.7379	NaN	11.941	11.5779	12.2021	NaN	0.0019888	0.0605499	0.126173	NaN	-0.187829	-0.259306	-0.0456588	-0.252527	-0.0842158	NaN	-0.327064	NaN	0.425188	-0.11744	0.118818	NaN	-0.0809998	0.345963	-0.0691142	NaN	0.168715	0.0544483	0.122309	-0.0522535
F9X6T0	NaN	12.3731	8.33069	11.6115	NaN	12.5692	8.33584	11.5457	NaN	11.1747	7.97854	11.5076	NaN	12.0021	8.19928	11.5827	NaN	11.9431	6.64703	11.6068	NaN	12.1532	7.05224	11.9861	NaN	0.0869946	0.69833	0.0965534	NaN	0.115072	0.4457	-0.104081	0.0631729	0.17691	NaN	-0.295233	NaN	-0.0149885	0.574537	-0.0320636	NaN	0.114047	-1.10035	-0.0650159	NaN	-0.00589197	-0.795126	0.0414338	0.547154
F9X6T7	14.6972	15.9216	15.5605	15.9407	15.1495	16.1171	15.672	15.9885	15.1515	15.2126	15.681	15.8966	15.4857	15.6924	15.4356	15.9763	15.3119	15.5499	15.4472	16.0706	16.0748	15.9667	15.752	16.3252	-0.0554964	-0.0719895	0.0940272	0.0328499	-0.0388904	-0.0445374	-0.0522751	-0.054253	0.0592456	0.0452412	0.0433957	0.0351858	0.0453818	-0.0321659	-0.0232268	-0.0313493	0.0714963	0.0133302	-0.134318	0.00582588	-0.0658869	0.100177	0.0705516	-0.0123191	-0.0232828
F9X6V2	14.3809	15.143	14.0905	14.8926	14.7484	15.4163	14.1845	15.1403	14.626	14.4816	14.2212	14.8772	14.9689	15.0097	13.9805	15.0719	14.8216	14.6737	14.0958	15.0493	15.7839	15.2123	14.3323	15.4452	0.051711	-0.0966296	0.0646244	-0.0616796	-0.01654	0.00864047	-0.0991873	0.0511143	-0.00657444	0.0260428	-0.0586063	0.0580854	-0.0478959	0.0390878	-0.0377846	0.0177732	0.00472396	-0.108912	-0.0451057	-0.0618796	0.0666072	0.0997276	0.0914103	0.0612461	-0.0902412
F9X6W9	14.9303	16.64	15.6607	16.3373	15.4653	16.714	15.8473	16.5056	15.3676	15.3589	15.7671	16.1659	15.7408	16.0657	15.5608	16.4625	15.5492	15.8351	15.801	16.3744	16.6236	16.3992	15.9211	16.7006	-0.123465	0.221073	0.0259263	0.0379894	-0.0241152	0.126922	-0.0452103	0.0714567	-0.0628302	-0.0369312	-0.0414965	-0.243994	-0.000540435	-0.0843454	-0.0663672	0.0634117	0.0078261	-0.126855	0.0512746	-0.0816965	0.181791	0.1072	0.0713078	-0.0283311	-0.0426111
F9X6X1	14.3661	13.4873	16.1192	14.7632	14.6332	13.6404	16.0789	15.0256	14.4073	12.9259	16.2349	14.5774	14.6928	13.3998	16.0375	14.8782	14.5747	13.0992	16.1258	14.987	14.7811	13.6099	16.1955	15.1122	0.349328	-0.123238	0.112158	-0.00226839	0.180657	-0.1383	-0.185961	0.125252	-0.117605	0.0585769	0.0351685	0.131401	-0.0115657	0.0581968	0.0380578	0.0129706	0.0701861	-0.0543529	0.00371531	0.064614	-0.623774	0.126292	-0.0265472	-0.0829636	0.235743
F9X6X2	11.0788	12.3942	11.8949	11.5333	11.6788	12.74	12.5193	11.965	11.6587	11.5666	12.1235	11.595	12.0038	12.3127	11.8474	11.8043	11.579	12.5111	12.0775	11.958	12.6035	12.4937	12.1645	12.0987	-0.12922	-0.192371	-0.0847513	-0.167295	0.035063	-0.014629	0.281935	0.129526	-0.0350952	-0.0253648	0.095243	-0.203825	0.108186	-0.00489357	-0.124537	0.00391614	-0.116683	0.381554	-0.0171371	0.100562	0.00741136	0.0341646	-0.0301448	-0.0316133	-0.138364
F9X6X9	12.6051	14.4817	13.4365	13.6485	13.3236	14.4821	13.6307	13.6347	13.0531	13.3836	13.514	13.6454	13.3176	13.9677	13.3134	13.6481	13.1725	13.7694	13.3965	13.8625	14.0491	14.2256	13.503	14.2024	-0.089342	0.1799	0.0956866	-2.47061e-05	0.193471	0.0121344	0.0321832	-0.148636	0.0674448	0.00394426	0.00330643	-0.102177	-0.064484	-0.0651987	-0.0196944	-0.100153	-0.0095686	-0.0754048	-0.0593068	0.0571874	-0.0333825	0.0507456	-0.0528129	0.124181	0.0243723
F9X6Y2	13.8155	14.6663	13.714	14.2558	14.1089	15.1623	13.9482	14.582	14.0897	14.4037	13.977	14.3527	14.1619	14.7069	13.7586	14.4386	13.9292	14.4781	13.5752	14.4446	14.7671	14.8149	14.2089	14.8969	0.229161	-0.289241	-0.0247245	-0.114148	0.0868917	0.0387103	-0.0483452	0.0771977	0.0531822	0.0689904	0.148001	0.264246	-0.112011	0.0203143	0.0275038	-0.0311824	-0.144833	-0.0204399	-0.278584	-0.0822841	-0.207209	-0.0135904	0.25516	0.0972342	-0.0826366
F9X710	16.0056	15.8671	15.3476	15.4036	16.4034	16.4588	15.5208	15.7019	16.3859	16.0354	15.4683	15.6146	16.6774	16.3923	15.3624	15.7622	16.4649	16.0941	15.096	15.9541	16.9846	16.0178	15.2819	16.02	0.0776979	-0.527272	0.126346	-0.214042	0.0397604	-0.103665	0.041785	-0.0505839	0.0674809	0.0777979	0.102603	0.457042	0.0619255	0.266839	0.148734	0.0447895	0.049337	0.1567	-0.240314	0.179628	-0.331324	-0.249644	-0.154349	-0.0272724	0.0563299
F9X713	12.1746	15.559	13.2615	12.7495	12.5753	15.6916	13.5681	12.8094	12.4507	14.6371	13.3983	12.3537	12.9116	15.1456	13.3316	12.8082	12.6925	15.0714	13.4457	12.6787	13.7498	15.3617	13.4931	12.9016	-0.0254153	0.064444	-0.0299713	0.157751	-0.0604374	0.0289812	0.0188224	0.0828251	-0.167531	-0.0624008	-0.104678	-0.0413782	0.0239912	-0.08001	0.0477582	0.116687	0.00480995	0.0338407	0.0391697	-0.0699323	0.16173	-0.00587767	-0.0133783	-0.1198	0.0360338
F9X732	14.9449	15.9773	15.6796	15.8776	15.4907	16.1135	15.8805	15.9819	15.4581	14.7809	15.7637	15.7158	15.852	15.42	15.6613	15.9251	15.5483	15.2284	15.8978	15.8439	16.7616	15.8346	15.9862	16.2142	-0.171984	0.167984	-0.007017	0.0763228	-0.0619034	0.136122	-0.0638895	0.0457642	-0.0150135	-0.092219	-0.014105	-0.212235	0.0475545	-0.120353	-0.0176826	0.0239788	-0.0562759	-0.123862	0.0962007	-0.114258	0.256714	0.152343	0.0846073	-0.016794	-0.102891
F9X745	NaN	13.7943	12.0904	12.7706	NaN	13.5708	12.9365	13.0037	NaN	12.634	12.7743	12.6584	NaN	13.1584	12.8373	13.2634	NaN	13.4077	13.4273	13.1021	NaN	13.7156	12.9546	13.3022	NaN	0.164016	-0.62144	-0.121039	NaN	-0.227575	-0.0331377	-0.0227692	-0.162723	-0.106831	NaN	-0.180238	NaN	-0.202917	0.133116	0.271998	NaN	0.234375	0.600482	0.0536404	NaN	0.212339	0.0278108	-0.0191081	-0.266502
F9X758	14.4766	15.1743	14.3583	13.4526	14.6434	15.4952	14.3484	13.6303	14.4892	14.685	14.2322	13.3224	14.751	15.0136	14.2112	13.3496	14.4344	14.7043	14.0112	13.3249	15.4831	15.3447	14.4827	13.8576	0.322744	-0.145387	0.209214	0.0881908	0.0538099	0.00746092	-0.0584859	0.130992	0.0284202	-0.0861632	-0.0200948	0.181369	-0.0905164	-0.0370991	0.0697302	-0.11467	-0.20712	-0.1584	-0.252879	-0.196411	-0.0588218	0.152056	0.118584	0.0634782	0.0498664
F9X773	15.6281	16.9825	16.4355	16.782	16.1388	16.7081	16.8591	16.9776	16.0745	15.4184	16.618	16.6533	16.5598	15.9834	16.5246	16.9411	16.3983	16.1386	17.085	17.0369	17.3569	16.4007	17.0287	17.0716	-0.172191	0.46039	-0.198088	-0.00330122	-0.0972706	0.0178868	-0.0322236	0.0574316	-0.0615298	-0.184876	-0.0812018	-0.287622	0.0718482	-0.269713	-0.101388	0.0560243	0.110276	0.0734884	0.336428	0.0947654	0.16854	0.00556992	0.180147	-0.14339	-0.0310142
F9X780	12.4105	12.2066	11.3989	12.4743	12.954	12.61	12.2787	13.2751	12.9744	12.3959	12.7737	13.3125	13.3208	13.2387	12.7855	13.734	13.4832	12.8403	13.1534	13.9213	12.9233	12.486	11.9265	13.3818	-0.0415117	-0.673129	-0.862345	-0.750381	0.0663151	-0.437864	-0.240259	-0.0844387	0.158244	0.343276	0.167094	0.332252	0.181229	0.627962	0.531878	0.409457	0.543546	0.417547	0.777169	0.539704	-0.916672	-0.266769	-0.549719	-0.272585	-0.0804053
F9X784	NaN	8.55815	9.67463	10.3446	NaN	8.21864	10.3309	10.8612	NaN	7.69223	10.4397	10.659	NaN	6.90605	10.03	10.4876	NaN	8.27715	10.8593	10.6218	NaN	8.4184	10.2601	10.6629	NaN	0.296221	-0.466235	-0.136467	NaN	-0.211378	-0.0677272	0.245307	0.248424	0.129592	NaN	0.246389	NaN	-1.08692	-0.103271	-0.0932482	NaN	0.472223	0.603419	-0.016177	NaN	0.283466	-0.0957775	-0.247839	-0.0821102
F9X786	14.458	16.3046	15.3212	16.0448	14.8798	16.1728	15.6011	16.1867	14.8739	14.963	15.4883	15.8888	15.1721	15.5248	15.3288	16.0154	14.8619	15.5086	15.4987	16.0582	16.2468	15.9869	15.723	16.4409	-0.0650517	0.311008	-0.0473935	0.0640897	-0.0789061	0.0111076	-0.0252874	0.0711479	-0.021371	-0.049603	-0.00450972	-0.214553	-0.0385429	-0.199819	-0.0321468	-0.0650881	-0.148776	-0.0280221	0.0150318	-0.0793655	0.335787	0.120278	0.139399	0.030587	-0.0908497
F9X789	12.2508	14.4376	11.5786	12.6413	12.252	14.1988	11.8627	12.8669	12.3776	12.625	11.7345	12.9121	13.3095	13.4733	11.5394	13.3655	12.8193	13.831	11.4659	13.2883	13.7721	13.9034	12.3012	13.3045	0.0129823	0.442586	-0.0435308	-0.296659	-0.421553	0.0357111	-0.0172381	-0.205974	0.0446396	-0.0569497	-0.215551	-0.5539	0.384047	-0.25275	-0.0751181	0.327723	0.0938238	0.292981	-0.271229	0.193443	0.146251	0.0353724	0.464066	-0.0631723	-0.116785
F9X799	15.5057	15.5923	15.3133	15.7838	15.9344	15.4872	15.5708	16.0261	15.9611	14.5005	15.4711	15.7522	16.371	14.8589	15.3682	16.0109	16.3507	15.2094	15.5218	16.1803	16.8982	15.4104	15.6242	16.2461	-0.105429	0.165655	-0.0400577	-0.0909669	-0.112453	-0.107467	-0.0402704	0.0164426	-0.0520533	-0.051492	-0.00538249	-0.109978	0.0723187	-0.298781	0.0224893	0.0363422	0.251922	0.239786	0.0534412	0.148631	-0.100977	0.110785	0.0558896	-0.0583952	-0.0195251
F9X7A5	15.8782	17.0657	16.0548	16.3729	16.1626	17.2525	16.2456	16.514	16.0656	16.1781	16.0212	16.32	16.4597	16.6861	15.7695	16.3772	16.1248	16.4074	15.8153	16.4278	17.2927	16.9166	16.1688	16.802	0.106672	0.0644967	0.167152	0.0290554	-0.0446722	0.0831865	0.100156	0.0352419	0.0466706	-0.0356676	-0.0612516	-0.00702363	0.000539437	-0.0461905	-0.110473	-0.0664749	-0.134392	-0.136856	-0.187352	-0.0728979	0.133104	0.0423872	0.0661837	0.0284049	0.0243241
F9X7A8	14.157	15.0116	13.9003	15.4929	14.9897	15.0811	14.2003	15.7947	14.5891	14.0982	14.0515	15.387	14.5938	14.5151	13.7389	15.4869	14.27	14.3044	14.1484	15.5771	15.5125	14.8639	14.1513	15.9998	0.0306903	0.115692	-0.00656591	-0.00509317	0.427725	0.0171431	0.0356446	0.161883	-0.0404011	-0.0246683	0.107428	0.0184018	-0.220071	-0.111839	-0.16031	-0.110811	-0.343935	-0.134455	0.126517	-0.0777314	-0.00183594	0.0950572	0.0293829	0.0721534	-0.0150085
F9X7B1	14.6478	15.6193	14.7526	14.9281	15.2262	15.8827	15.0389	15.0649	15.0283	14.7837	14.9896	14.8444	15.4604	15.2529	14.6424	14.9177	15.3728	15.14	14.9358	14.9771	16.0333	15.5477	14.9671	15.4004	-0.0879228	-0.00193383	-0.0102401	0.0311805	0.0547866	0.0934485	0.0182718	0.0330621	0.0179005	0.0575206	-0.0628431	-0.0214046	0.0370958	-0.0993965	-0.11282	-0.0791069	0.149367	-0.0242106	0.0579664	-0.0767695	-0.0904836	0.053497	-0.0106988	0.0737333	-0.023741
F9X7C4	15.7878	16.6575	15.9819	16.7632	15.9877	16.7334	16.015	16.8996	15.8824	15.6276	15.7938	16.6371	16.3978	16.17	15.6387	16.8308	15.9136	15.8438	15.8018	16.8623	17.4597	16.3706	16.1262	17.1881	0.108689	0.173486	0.213912	0.0247727	-0.127119	0.0813853	-0.0107851	0.0263415	-0.0308294	-0.143496	-0.152106	-0.0402627	0.0310634	-0.0450277	-0.121645	-0.00736677	-0.253126	-0.183191	-0.0811903	-0.032972	0.392598	0.0136103	0.143204	0.0200539	-0.0121515
F9X7C8	NaN	11.6737	9.68678	10.9641	NaN	11.6208	9.15353	10.3873	NaN	11.1626	10.0133	10.7637	NaN	11.3864	9.54208	10.1113	NaN	10.9346	9.24954	10.3396	NaN	12.0221	9.59339	11.0476	NaN	-0.0431863	0.271913	0.486909	NaN	-0.264161	-0.519116	-0.224719	0.357073	0.429189	NaN	0.261821	NaN	-0.0614863	0.134836	-0.465668	NaN	-0.325192	-0.280341	-0.294374	NaN	0.432205	-0.0364814	0.140779	0.059711
F9X7F1	11.904	NaN	10.9081	10.5707	12.2831	NaN	11.2189	10.7958	12.0136	NaN	11.1563	10.5205	12.4338	NaN	11.367	10.8079	12.1063	NaN	11.2944	10.6216	12.8387	NaN	11.0146	11.0375	0.199851	NaN	-0.126904	-0.0298617	0.143188	NaN	-0.0738441	0.0603864	-0.00954466	-0.0479258	-0.0459909	NaN	0.042029	NaN	0.339656	0.107556	-0.0855898	NaN	0.144439	-0.135835	-0.253488	NaN	-0.235422	0.00729817	0.174899
F9X7F4	11.7736	13.9392	11.5188	NaN	12.2008	14.4479	11.8446	NaN	12.1382	13.6064	11.7375	NaN	12.5083	14.055	11.4636	NaN	12.3016	13.6141	11.7902	NaN	13.1557	13.9624	11.8842	NaN	-0.0137185	-0.248475	-0.0627369	NaN	-0.0221932	0.0921545	0.00522761	NaN	NaN	-0.0133935	-0.00448032	0.234808	0.0333697	0.136302	-0.110339	NaN	0.026651	-0.116545	0.0935862	NaN	-0.0196286	-0.0982448	0.0876557	NaN	-0.0982374
F9X7F7	6.53652	11.6398	11.2908	8.07612	9.55685	11.4017	11.2163	8.21675	8.24617	10.6964	11.1441	6.1812	9.36707	10.6964	10.9946	6.13013	9.83071	10.7095	11.3067	8.1355	10.2864	11.5757	10.8489	7.74248	-1.87504	0.269695	0.282159	0.787534	0.709576	-0.136447	-0.0501791	0.793321	-1.03688	-0.0338462	-0.520761	0.142438	0.2679	-0.40469	-0.0064089	-1.25825	0.931473	-0.203576	0.183009	0.690059	0.486849	0.332581	-0.374734	0.0242136	-0.251139
F9X7H3	18.0308	18.6989	18.5817	19.0583	18.7315	19.007	18.3547	19.0721	18.6086	18.1173	18.3819	19.0071	18.3654	18.6189	18.2029	18.9111	18.4455	18.191	18.2061	19.0695	19.3498	18.9282	18.4454	19.4846	0.00126344	-0.144778	0.344546	0.0829329	0.266266	-0.00476199	-0.140311	-0.0380455	0.102305	-0.0245997	0.22365	0.0896344	-0.351759	0.0441275	-0.0266328	-0.164054	-0.0716855	-0.195666	-0.146161	-0.0627101	-0.0677351	0.211444	-0.00684147	0.0795721	0.0168812
F9X7H8	12.0611	13.1892	11.7005	12.6468	12.3487	13.3635	11.4275	12.7063	12.1011	12.3187	11.2412	12.6278	12.0497	12.76	10.8172	12.1671	11.7281	12.2006	10.3612	12.4512	13.4912	13.0726	11.2267	13.3857	0.323485	0.12159	0.696354	0.107763	0.175426	0.127782	0.165566	0.0324198	0.159247	0.0678131	0.0080969	0.0672153	-0.375446	-0.0386125	-0.179286	-0.471739	-0.49717	-0.409987	-0.757966	-0.24472	0.365607	0.132013	0.00751879	0.417029	0.0817559
F9X7I9	14.0372	15.5996	14.3984	13.7816	14.3826	15.6177	14.6203	13.7863	14.3193	14.5163	14.6249	13.5934	14.6815	15.0595	14.3506	13.8047	14.5031	15.1278	14.7907	13.8662	15.2214	15.3916	14.7181	14.0589	0.0720909	0.130715	-0.0605265	0.0914915	-0.0182749	-0.0192637	-0.0963762	-0.0386431	-0.0261758	-0.00329253	-0.00116947	-0.136564	0.0287908	-0.140475	-0.100723	0.0148716	0.0503523	0.115851	0.216755	0.0192852	-0.13179	0.0497363	0.0441631	-0.0608295	0.0831227
F9X7J8	12.2595	NaN	11.7809	13.059	12.5771	NaN	11.8904	13.1765	12.6384	NaN	12.1097	13.1396	12.96	NaN	11.8123	13.2893	13.2111	NaN	12.228	13.4566	13.7466	NaN	12.2539	13.4663	-0.0802201	NaN	-0.106716	-0.0804725	-0.198325	NaN	-0.255021	-0.0977827	0.0706285	0.0527778	-0.0566682	NaN	-0.0673174	NaN	-0.0677465	0.0500781	0.383677	NaN	0.225399	0.160324	0.018854	NaN	0.151306	-0.102775	-0.111598
F9X7J9	14.9538	16.1083	14.7527	15.491	15.4498	16.4201	14.7161	15.5011	15.3583	15.3556	14.6502	15.3107	15.5195	15.8887	14.5602	15.4781	15.4176	15.64	14.572	15.486	16.2589	16.1709	14.7386	15.9532	0.019858	-0.072412	0.212679	0.0794528	0.0801461	0.0712244	-0.0817198	-0.0453346	-0.0303963	-0.0591794	0.069037	-0.0090723	-0.102025	-0.0231203	0.0277652	-0.0333037	-0.00398436	-0.0837281	-0.0830915	-0.082395	-0.0630318	0.117108	-0.0164531	0.111977	0.0224943
F9X7K9	13.5269	15.9371	14.3002	16.2355	14.1628	15.8002	14.6598	16.3978	14.263	14.6828	14.5858	16.1091	14.363	15.216	14.3918	16.2997	14.1687	15.1981	14.6684	16.3021	15.2701	15.6883	14.7948	16.5279	-0.20648	0.266498	-0.141689	0.048607	-0.00628001	-0.0384154	-0.0399004	0.0760165	-0.00728126	-0.0253213	0.174327	-0.171712	-0.0579836	-0.185589	-0.0424311	0.0129617	-0.0523503	-0.0155086	0.111474	-0.041658	0.148767	0.144726	0.137867	-0.0886459	-0.0939444
F9X7L3	11.3085	12.5596	9.12337	11.654	10.9769	12.6529	9.10578	11.3668	11.2197	11.9488	7.81012	11.3341	11.6836	12.4848	8.45446	11.4531	11.45	12.0947	9.58171	11.3924	12.2769	12.7575	8.75178	11.8469	0.381656	-0.10695	0.443741	0.271212	-0.385723	-0.181713	0.168373	-0.150833	0.0218034	-1.03877	-0.0625174	0.098328	0.0691016	0.087243	-0.217547	-0.0294276	0.0354941	-0.114855	0.787065	-0.147186	-0.038011	0.217946	-0.142857	0.034431	0.229537
F9X7L4	16.9433	17.4623	17.2665	17.3819	17.3338	18.0497	17.3524	17.4651	17.234	17.2457	17.1437	17.4048	17.6093	17.5894	16.9977	17.4005	17.1983	17.0861	16.8303	17.5223	18.5891	17.4575	17.1878	17.8656	0.0177385	-0.269652	0.261715	0.000348814	-0.0275061	0.149676	0.0898152	-0.0513661	0.0937316	-0.0303971	-0.046956	0.329878	-0.0038837	0.126403	0.000452459	-0.0808954	-0.214882	-0.188849	-0.289505	-0.0161666	0.27549	-0.147456	-0.0320805	0.0543477	-0.0350378
F9X7L5	12.3282	13.6435	12.2601	13.6582	12.7169	13.8851	12.5289	13.7898	12.5758	13.2306	12.4986	13.6698	12.8593	13.6874	12.2844	13.9536	12.5905	13.2847	11.9102	13.7674	13.0278	13.6108	12.4263	14.0817	0.204177	-0.163662	0.0668723	-0.0367569	0.157123	-0.0901381	0.0779491	-0.0399679	0.0453086	0.136165	0.0964256	0.239484	0.0477106	0.149156	0.098874	0.1588	-0.021181	-0.0654508	-0.397978	-0.0844699	-0.484255	-0.0693892	0.0181176	-0.0429139	0.162268
F9X7M9	13.2854	15.1073	13.327	13.0933	13.6074	15.2976	13.5505	13.3547	13.4404	14.7026	13.5062	13.0462	14.022	15.0198	13.335	13.1897	13.8577	14.8266	13.5785	13.7326	14.6934	15.0727	13.3833	13.6698	0.0267812	-0.14734	0.00515714	-0.12931	-0.0869229	-0.125047	-0.0291018	-0.00277175	-0.105853	0.0150841	-0.173675	0.264043	0.0757624	0.0341705	0.0207576	-0.132701	0.111363	0.0290561	0.141643	0.353138	0.0466918	-0.0548822	-0.15354	0.0174975	-0.0251198
F9X7N0	12.938	13.2696	12.3385	NaN	13.2562	13.8367	12.8829	NaN	13.2275	12.8541	12.8283	NaN	13.4876	13.3437	12.6639	NaN	13.3137	13.1458	12.6488	NaN	14.064	13.4696	12.7636	NaN	0.115941	-0.300542	-0.224227	NaN	-0.00161957	0.0985669	0.0623678	NaN	NaN	0.0962808	0.0499793	0.100067	-0.0221151	0.0426094	0.108765	NaN	0.00396118	0.0327514	-0.0290202	NaN	-0.146147	0.0265471	-0.0141663	NaN	-0.0916873
F9X7Q3	7.90833	7.79967	NaN	11.0065	9.68571	8.41557	NaN	10.2195	9.51379	6.68748	NaN	10.698	8.44564	8.00062	NaN	10.5926	9.11064	6.15352	NaN	10.6152	10.0032	7.18299	NaN	11.0898	-0.643822	0.176199	NaN	0.427975	0.697839	0.62402	NaN	-0.493798	0.190026	NaN	0.606257	-0.119902	-0.794128	0.64611	NaN	-0.085638	0.070808	-1.01294	NaN	-0.120179	0.0630454	-0.313484	NaN	0.0816132	0.0430593
F9X7R1	12.0477	14.5004	13.8539	12.8008	12.5503	14.3725	14.0726	12.9621	12.5963	13.0661	14.0756	12.7048	12.9956	13.5396	13.8703	12.8878	13.0069	13.807	13.9962	12.9944	13.5527	14.0352	14.0473	13.0569	-0.184806	0.363445	-0.00716275	0.0247912	-0.117962	0.067414	-0.0462797	0.0512318	-0.000731111	0.04524	0.00842004	-0.254766	0.0755068	-0.328357	0.016832	0.0119903	0.286718	0.126998	0.0201377	0.0615356	-0.0678769	0.0252652	-0.0287672	-0.148818	0.104116
F9X7S7	NaN	10.5464	11.2349	13.3125	NaN	9.87204	11.027	13.1209	NaN	8.15608	10.8445	12.9963	NaN	9.01388	11.4324	13.1255	NaN	9.65177	11.5816	13.3376	NaN	9.86878	11.202	13.4832	NaN	0.778089	0.139425	0.208225	NaN	-0.0643611	-0.326279	-0.118137	-0.0374118	-0.420228	NaN	-0.796151	NaN	-0.485481	0.344546	-0.0784815	NaN	0.340453	0.371052	0.0765307	NaN	0.227451	-0.108515	-0.0507251	0.35251
F9X7T8	12.5049	13.0158	11.1187	13.226	12.7459	12.9999	11.4402	13.2545	12.9479	11.8958	11.8078	13.2591	13.2649	12.4434	11.7754	13.4239	13.0145	12.3188	11.4992	13.62	14.0979	12.8042	11.866	13.6407	-0.0320147	0.185979	-0.340961	-0.0528982	-0.226768	0.00202879	-0.27717	-0.159276	0.050668	0.178849	0.0556384	-0.117907	0.0403992	-0.117466	0.323383	0.0451932	-0.0101532	-0.0540058	-0.0754579	0.184213	0.172898	0.101372	0.191357	-0.0679005	-0.159405
F9X7U3	12.2647	13.8211	12.1003	12.4055	12.618	14.1698	12.0189	12.5812	12.5201	13.7118	12.1541	12.4576	12.727	13.8446	12.1932	12.7779	12.4396	13.4307	13.0502	12.699	13.6091	14.0677	12.4325	13.1451	0.12738	-0.270023	-0.0996889	-0.147116	0.0449267	-0.0894131	-0.438871	-0.106221	-0.0244855	-0.215101	0.0273994	0.436764	-0.0979729	0.0224685	0.000880182	0.125451	-0.185432	-0.20338	0.735201	-0.0104576	0.0836994	0.103584	0.0175797	0.162828	-0.189285
F9X7U6	11.8113	14.6642	13.1159	12.8743	12.5179	14.7081	13.4043	13.065	12.4304	13.4387	13.3086	12.9118	13.0413	14.1115	12.9978	13.0409	12.7585	14.0844	13.3343	13.1035	13.904	14.4597	13.5805	13.1988	-0.373525	0.169602	-0.0494687	-0.0329832	-0.102672	0.0454108	-0.0187557	0.022884	0.0750375	-0.0259671	-0.109769	-0.239817	0.168871	-0.114145	-0.159908	0.0338763	0.0859765	0.0468323	0.053935	0.0393533	0.33112	0.0921178	0.200164	-0.138168	-0.192902
F9X7U9	7.87424	11.1682	7.9739	NaN	7.81365	10.9302	8.56841	NaN	8.30332	9.78777	7.97252	6.3299	7.35694	10.5648	8.55071	NaN	7.91097	10.494	8.69349	6.00939	10.2498	10.5222	8.25153	6.0488	0.181821	0.340155	-0.236288	NaN	-0.314488	-0.0658781	0.100451	NaN	NaN	-0.406931	0.255525	-0.224155	-1.0231	0.00576136	0.348142	NaN	-0.269127	0.122946	0.368288	NaN	1.16937	-0.17883	-0.173661	NaN	-0.177062
F9X7V7	13.7808	15.1656	13.6058	14.4394	14.3688	15.2547	13.5816	14.4035	14.2821	14.3518	13.54	14.292	14.5617	14.976	13.2373	14.5328	14.2613	14.6617	13.5423	14.4361	15.2376	15.1209	13.6196	14.7745	-0.0754858	-0.00634108	0.209631	0.0847873	0.0767957	-0.085339	-0.0724161	-0.0859509	0.00787818	-0.025454	0.0704378	-0.00409764	0.0177631	0.0730342	-0.151306	0.0784618	-0.0827237	-0.0532255	0.0310974	-0.0753868	-0.00678712	0.075969	0.00844704	-0.00978962	0.0361881
F9X7W6	12.5212	13.2849	NaN	11.9521	12.8936	13.7407	NaN	12.2363	12.8011	13.3366	NaN	11.8885	12.9886	13.3864	NaN	12.1273	12.8387	13.1147	NaN	12.2431	13.502	13.3354	NaN	12.5807	0.15606	-0.331732	NaN	-0.0940963	0.0927819	-0.0439807	NaN	0.0551958	-0.0872356	NaN	0.0806229	0.536107	-0.0641367	0.0387337	NaN	-0.0186928	-0.0141289	-0.0448872	NaN	0.0400669	-0.251199	-0.154241	NaN	0.104762	0.0103031
F9X7X4	13.0766	14.4987	11.0612	14.4264	13.8849	14.9981	11.5858	15.2007	13.9463	14.5244	11.7322	15.1368	14.3803	15.0819	11.8639	15.4758	14.4337	14.9904	11.9999	15.5365	14.1759	14.424	11.0567	15.0235	-0.34731	-0.504397	-0.363854	-0.58178	0.0253398	-0.17308	-0.0970358	0.0577313	0.199122	0.137879	0.167015	0.337449	0.268841	0.347759	0.446474	0.367799	0.522164	0.444362	0.459858	0.371487	-0.63605	-0.452093	-0.583322	-0.414359	0.0721206
F9X7Y0	19.7171	21.181	20.3486	21.3172	20.3229	20.8783	20.5031	21.4766	20.2643	19.7419	20.3617	20.9614	20.3898	20.2543	20.1696	21.3627	20.4618	20.3611	20.6264	21.4572	20.8222	21.0074	20.6262	21.5661	-0.0535074	0.360126	0.0342444	0.0854201	0.116544	-0.11061	-0.0690558	0.110014	-0.199829	-0.121901	0.138295	-0.262851	-0.0683985	-0.297562	-0.137138	0.031121	0.203528	-0.00271653	0.19701	0.0685823	-0.336461	0.313614	0.0968407	-0.0953089	0.1119
F9X7Z3	16.0534	16.7141	16.0993	16.8899	16.4607	16.812	16.3069	17.0545	16.2067	15.8528	16.2346	16.809	16.7075	16.2959	16.0841	16.856	16.5402	16.2238	16.2804	17.0838	17.1516	16.6017	16.2755	17.2861	0.0924217	0.0472247	0.0107693	0.018447	0.0640152	-0.0229413	-0.039455	0.0482427	0.00808339	-0.0232328	-0.109598	0.00204867	0.0589816	-0.102031	0.00314406	-0.115242	0.0915953	0.013934	0.0768338	0.0554956	-0.197415	0.0617649	-0.0280595	-0.015027	0.0869
F9X7Z4	11.8762	12.7409	12.9856	NaN	12.2958	12.6998	13.2503	NaN	12.357	11.6273	13.3426	NaN	12.7668	12.3248	13.0377	NaN	12.8802	12.4713	13.4843	NaN	13.1831	12.5602	13.4186	NaN	-0.124554	0.0867224	-0.142653	NaN	-0.140657	-0.122466	-0.135802	NaN	NaN	0.0450837	0.000834346	-0.210823	0.0783839	-0.0604858	-0.0830109	NaN	0.391716	0.274083	0.241025	NaN	-0.205724	0.032969	0.075357	NaN	-0.0276954
F9X7Z8	14.3814	15.4978	15.0846	16.6625	14.8249	15.6178	15.5801	16.8744	14.6752	14.6642	15.526	16.588	15.1308	15.0832	15.4588	16.6881	14.8486	14.747	15.7719	16.6551	15.9109	15.2375	15.445	16.9217	-0.0215124	0.106395	-0.26826	0.0559636	-0.0137298	0.0583046	-0.0304819	0.133008	0.0519648	0.00389547	-0.0830559	0.0888878	0.0402824	-0.0392349	0.113592	-0.0181872	-0.041974	-0.187433	0.304095	-0.108286	0.11999	-0.0269197	-0.122841	-0.114464	0.00420542
F9X7Z9	13.5899	13.1811	13.675	13.8611	13.65	13.1611	13.854	13.9202	13.5073	12.375	13.6315	13.6565	13.8588	12.7572	13.5906	13.7526	13.6426	12.5325	13.4765	13.8481	14.366	12.9967	13.7339	14.1975	0.379846	0.0969814	0.139635	0.113524	0.00428431	-0.0910902	0.0608872	0.0377648	-0.02052	-0.073077	-0.0581153	0.10697	-0.0388896	-0.0578724	0.062877	-0.0947642	-0.0550992	-0.0945935	-0.17385	-0.0562872	-0.232027	0.039605	-0.0164718	0.0202829	0.229649
F9X809	13.4401	13.1713	13.9516	13.7807	13.6571	13.4873	14.1923	13.6177	13.3422	12.3972	13.9779	13.5223	13.909	12.9497	14.0337	13.5584	13.7953	12.5593	14.2462	13.8911	14.5397	13.266	14.2493	14.1444	0.218595	-0.0506466	-0.0320346	0.153398	-0.000118807	0.0972766	-0.049074	-0.144488	-0.0345041	-0.174952	-0.234658	-0.0086444	-0.000148475	-0.00328329	0.0577084	-0.168716	0.0861571	-0.205716	0.147614	0.106915	-0.0698275	0.171013	0.0507377	0.0873955	0.0124983
F9X824	12.4485	14.0891	11.7253	13.8836	13.4631	14.4381	12.8485	14.426	13.1958	14.0956	12.5489	14.4594	13.4176	14.4656	12.5923	14.2275	13.3239	14.2287	12.7535	14.2261	12.7574	13.9323	12.0182	14.1978	-0.0934647	-0.369295	-0.564255	-0.228021	0.485429	-0.188354	0.301157	0.179544	0.418254	0.0900687	0.298463	0.453319	0.187986	0.276178	0.310354	0.016055	0.294228	0.227261	0.348981	-0.0423661	-1.17264	-0.399109	-0.486306	-0.343466	0.286622
F9X828	11.1317	11.9923	NaN	11.3746	11.295	12.0457	6.95884	11.4839	11.0636	11.3225	NaN	10.9247	11.626	11.782	NaN	10.8487	11.732	11.6349	7.08353	11.4038	12.4828	11.9924	NaN	11.4747	0.135612	-0.0528427	NaN	0.24793	-0.13687	-0.1675	NaN	0.222456	-0.131377	NaN	-0.287895	0.0934933	-0.0576976	0.00583305	NaN	-0.377711	0.248247	0.0467191	NaN	0.120331	0.0986041	0.0742968	NaN	-0.0816296	0.0798092
F9X833	8.32885	10.9948	11.0541	11.2172	9.69961	11.2216	11.2235	11.3086	9.63757	9.95732	11.0051	11.5692	9.97613	11.1268	10.8944	11.5067	8.22434	9.85481	10.5788	11.7048	11.1146	10.9557	11.3191	11.7022	-0.608924	0.0595119	0.166463	-0.159172	0.326109	0.118169	0.0781462	-0.202558	0.263402	-0.0517306	0.344412	-0.161927	0.350746	0.460458	0.0143849	0.0305213	-1.20112	-0.623524	-0.423768	0.171611	0.788773	0.147311	0.216504	-0.103804	-0.397727
F9X843	12.046	11.3662	11.6831	13.5225	12.6012	11.8508	11.814	13.7027	12.5167	10.7694	11.8486	13.4041	12.7419	11.364	11.8546	13.6829	12.8406	11.3381	11.7797	13.8348	13.4821	11.4909	11.7085	13.9235	-0.099686	-0.247236	0.0266053	-0.0308336	0.0198214	0.069336	-0.100274	0.0145823	-0.0787091	0.0228366	0.0156579	-0.0278808	-0.0913924	0.0195917	0.205733	0.0298012	0.207234	0.181736	0.0081437	0.124617	-0.0516354	0.00445348	-0.163045	-0.0594573	-0.0203665
F9X855	9.625	12.4335	13.6052	13.5985	10.471	12.6205	14.0741	13.6697	9.22209	10.8796	13.9132	13.5481	10.5726	11.959	13.9325	13.7982	9.93127	11.6548	14.0384	13.9091	11.0932	11.8053	13.725	13.8725	0.0315412	0.291229	-0.151262	-0.00905108	0.44179	0.310112	0.0598563	-0.072747	0.0110371	-0.0126064	-0.726737	-0.446606	0.291541	0.0857063	0.183601	0.0908084	-0.149863	-0.0305017	0.16688	0.144717	0.111728	-0.20994	-0.246469	-0.164764	0.167975
F9X870	11.5155	9.61259	11.9335	13.8098	12.156	11.5417	12.1823	14.4614	11.8079	2.39325	12.2007	13.7008	12.6632	9.12275	12.0768	14.0382	12.316	8.09803	11.8806	14.1364	13.4952	10.2088	12.3483	14.5492	-0.251077	0.86623	-0.045252	-0.181075	-0.0462782	2.62728	-0.0542682	0.335734	-0.219572	0.0525923	-0.314037	-5.53702	0.209036	0.64535	0.105607	-0.0524007	0.0617424	-0.191323	-0.213193	-0.0113498	0.340614	1.58948	0.154513	0.128663	-0.456111
F9X873	14.0857	15.2301	13.4247	15.1005	14.456	15.7162	13.8356	15.1898	14.3771	14.6027	13.6731	15.0697	14.8033	15.1429	13.6427	15.3364	14.344	14.9944	13.9202	15.4374	15.7248	15.4521	14.018	15.9017	0.0129498	-0.209778	-0.202779	-0.113688	-0.0524564	0.108221	-0.0496875	-0.15916	-0.0738962	-0.123648	-0.0510047	-0.0210854	0.0429433	-0.0280477	0.0228789	0.02243	-0.21643	0.0114861	0.177683	0.066423	0.263999	0.139204	0.175551	0.257892	-0.337485
F9X877	13.4284	13.1768	11.5018	12.9129	13.4115	12.8513	11.3478	12.7665	12.8507	11.6696	10.8492	12.154	12.4009	11.6521	8.10926	12.2283	12.0743	11.0219	8.43879	12.1008	13.0073	11.3085	9.16942	12.4603	1.12526	0.979983	1.72403	0.600829	0.672692	0.486338	1.31221	0.319625	-0.0874899	0.9021	0.192238	0.288822	-0.589857	-0.275817	-1.66093	-0.183537	-0.716503	-0.717972	-1.45403	-0.368055	-0.68383	-0.761354	-0.823386	-0.281373	1.74501
F9X878	10.1774	10.9968	12.312	12.5929	10.7928	11.5494	12.0681	12.6338	10.3998	9.03337	11.9248	12.0915	11.0274	10.3938	11.4372	12.6242	10.6403	10.789	12.0303	12.6566	11.932	10.879	12.196	13.0516	-0.091812	0.139709	0.442174	0.109589	0.0878398	0.524224	-0.0595027	0.0156378	-0.321318	-0.114292	-0.224796	-1.00759	0.0705811	-0.194266	-0.425002	0.0410974	-0.116574	0.388924	0.0454727	0.0164315	0.274761	0.148998	0.11115	0.138563	-0.0184529
F9X880	9.87906	13.2381	12.4163	12.4209	10.2751	13.1248	12.8105	12.43	10.4751	12.1386	12.7338	12.2528	10.6262	12.8336	12.7424	12.1688	10.7541	12.9277	12.9603	12.5388	11.1651	13.0745	12.741	12.6679	-0.0909778	0.0984142	-0.192806	0.132827	-0.130683	-0.183053	-0.0564376	0.00708797	0.0351793	-0.0446423	0.149708	-0.185009	-0.0314843	-0.0371793	0.140901	-0.219106	0.296418	0.245026	0.236142	0.093905	-0.192982	0.0618011	-0.0831566	-0.0498932	0.052922
F9X887	14.8815	16.5098	15.205	16.2516	15.4337	16.388	15.748	16.4022	15.3858	15.3565	15.628	16.1032	15.7744	15.9479	15.4394	16.4192	15.7313	15.9628	15.8359	16.4531	16.1703	16.1606	15.6685	16.5557	-0.122228	0.20536	-0.257579	0.0125399	-0.00580779	-0.08451	0.0276386	0.028288	-0.0653	-0.00378845	0.026646	-0.131836	0.0829935	-0.0875738	-0.0155405	0.0803093	0.23987	0.115389	0.258319	0.0571512	-0.221474	-0.0168289	-0.00905003	-0.112988	0.0496084
F9X892	12.7579	13.9121	13.6434	13.9651	13.5838	14.5893	13.9718	14.0511	13.2263	13.6129	13.7857	13.7982	13.103	14.0226	13.6754	13.9773	13.089	13.5968	13.7674	14.0221	13.7745	14.0246	13.5868	14.2603	0.0612646	-0.297743	0.0298985	0.0778398	0.451402	0.211335	0.100532	0.0290613	-0.0185491	0.00288489	0.174233	0.219074	-0.281317	0.0817052	0.0695191	-0.00973491	-0.0953569	-0.156105	0.0388369	-0.0219734	-0.310226	-0.0582662	-0.241672	-0.0566436	0.134517
F9X8B2	15.0648	15.9726	15.734	15.4587	15.5115	16.3305	15.8426	15.4929	15.4722	15.2761	15.687	15.5177	15.8187	15.8413	15.4738	15.5763	15.3935	15.3209	15.0827	15.7693	16.913	15.7894	15.7422	16.1167	-0.0717289	-0.0326998	0.265165	-0.0714128	-0.0608001	0.157116	0.116039	-0.172093	0.058036	0.048924	-0.019686	0.0869152	-0.00543279	0.104957	0.01259	-0.0536532	-0.230742	-0.22742	-0.501113	0.0822721	0.38839	-0.0888689	0.0583948	0.156851	-0.106361
F9X8G5	11.2699	11.9445	NaN	7.96382	11.9582	12.3429	NaN	8.71579	11.7254	11.5774	NaN	8.2426	11.7701	11.6623	NaN	9.01016	11.5255	11.2222	NaN	7.89966	13.2035	11.9369	NaN	9.26179	-0.0797619	-0.0866813	NaN	-0.426707	0.1728	0.143643	NaN	0.190424	-0.0774193	NaN	0.0202833	0.362307	-0.267231	-0.0999374	NaN	0.519845	-0.311863	-0.352013	NaN	-0.647727	0.465772	0.0326819	NaN	0.441584	-0.511062
F9X8J5	8.75338	13.3026	11.2821	9.55748	9.9125	13.2012	11.43	9.22258	9.47644	11.8338	11.5029	8.30684	8.33181	12.3512	11.3934	9.10847	9.6529	12.5146	11.5086	9.75877	10.584	13.1453	11.531	9.8875	-0.13939	0.327692	-0.0343294	0.375654	0.584008	0.0581459	-0.144225	-0.0940911	-0.804487	0.0172331	0.228292	-0.325059	-1.24857	-0.354799	0.0845778	-0.173149	0.272448	-0.0033256	0.07719	0.420085	0.303212	0.297345	-0.000446297	0.275988	-0.0866182
F9X8K4	15.2545	15.4919	15.2277	14.4118	16.0714	16.2093	15.5358	14.5941	15.9366	15.7631	15.5999	14.6629	16.1055	16.2718	15.4189	14.5631	15.9554	15.8342	15.225	14.7422	16.4428	15.6245	15.2178	15.1341	-0.147402	-0.624019	-0.0182607	-0.147822	0.233688	-0.0747849	0.0321028	-0.100346	0.173855	0.184675	0.179265	0.463231	0.015899	0.424767	0.18058	-0.0962521	0.0657723	0.175264	-0.135946	0.0256952	-0.347222	-0.364459	-0.24315	0.14487	-0.0318856
F9X8L4	13.476	13.2902	12.7807	12.9202	14.2287	14.0339	13.1903	13.4333	14.2374	13.4558	13.5476	13.3211	14.2043	13.8327	13.3791	13.4949	14.137	13.515	13.7397	13.7654	15.4037	13.4905	12.7611	13.5456	-0.246126	-0.562997	-0.327508	-0.368106	0.0708373	0.0126124	-0.175642	0.010195	0.103297	0.270182	0.159946	0.418771	-0.205456	0.248494	0.278557	0.106774	-0.0727977	0.118807	0.516492	0.320241	0.293596	-0.235687	-0.562081	-0.172401	-0.20704
F9X8L6	9.78588	13.4074	10.9392	12.147	10.6644	13.7335	11.5475	12.0541	9.98328	12.8253	11.3507	12.1448	10.0946	13.0618	11.1368	12.3485	10.9403	13.1056	11.6909	12.3659	11.421	13.3348	11.752	12.6737	-0.136627	-0.0875021	-0.338741	-0.0169208	0.306135	0.0705614	0.0117941	-0.244615	0.0514519	-0.0965554	-0.294603	0.146444	-0.515508	-0.164165	-0.133534	0.0848441	0.530132	0.0677343	0.297949	0.0451274	0.110471	-0.0330726	0.259088	0.0801126	-0.249098
F9X8M1	14.3686	15.0273	14.3704	14.3757	14.7297	14.8992	14.6265	14.4044	14.7586	13.6037	14.6354	14.2062	15.0599	14.177	14.5447	14.5412	15.0958	14.3382	14.6395	14.5885	15.5499	14.8428	14.7813	14.7106	0.000551999	0.295754	-0.104301	0.0297207	-0.0740686	-0.00041309	-0.105982	-0.076427	-0.0693165	-0.00860307	0.0351884	-0.311715	0.00430328	-0.285556	0.0775672	0.0954291	0.24015	0.063639	0.0497813	0.0856244	-0.206125	0.238291	0.0915373	-0.0650307	0.0407631
F9X8M7	13.9773	15.8722	13.7468	15.1187	14.6174	16.1707	14.2706	15.2809	14.4406	15.1662	14.136	15.0988	14.9745	15.8954	14.2421	15.3557	15.0766	15.85	14.724	15.6432	15.4634	15.7999	14.0826	15.4416	-0.221952	-0.170326	-0.328628	-0.0793475	-0.0175407	-0.039982	-0.0626446	-0.0519694	-0.0287675	-0.108773	-0.113998	-0.0603154	0.0876638	0.121826	0.174295	0.0578932	0.389698	0.264479	0.533564	0.288332	-0.123871	-0.115682	-0.207814	-0.186141	-0.0416863
F9X8N9	14.1596	14.1899	13.5701	13.4124	14.6157	14.5344	13.7789	13.5401	14.4764	13.8545	13.6692	13.4718	14.508	14.3576	13.5379	13.5517	14.4593	14.0179	13.6034	13.8649	15.548	14.1894	13.5272	14.0243	0.0908589	-0.25088	0.0805359	-0.106655	0.11125	-0.0744385	0.0315665	-0.113803	0.0232158	0.0103943	0.0522779	0.229786	-0.248405	0.1858	0.0560096	-0.067175	-0.097149	0.0340777	-0.00117624	0.188913	0.0911667	-0.124345	-0.17733	0.0755038	-0.0127838
F9X8P1	13.4398	14.8015	13.8965	14.487	13.7871	14.6855	14.211	14.5035	13.6723	13.374	14.0564	14.3633	13.9963	14.0277	13.7731	14.4647	13.9212	13.9925	14.0943	14.6516	14.5941	14.3461	14.2292	15.0588	0.0970988	0.346803	-0.0219954	0.0239186	0.00863561	0.0626763	0.0346842	-0.0943656	-0.0292221	-0.0313984	-0.0257937	-0.264661	-0.0340443	-0.158009	-0.137758	-0.0981601	0.0907811	-0.005201	0.0607946	0.0317123	-0.136678	0.0183922	0.0956728	0.166117	0.0755801
F9X8P7	15.7309	15.7303	15.206	14.6916	16.1366	16.2501	15.3337	14.7949	15.9804	15.4763	15.2152	14.7211	16.2397	15.8806	14.9929	14.7497	16.139	15.6385	15.1294	14.7401	16.9283	15.9561	15.1689	15.401	0.0974714	-0.341832	0.156573	-0.0329936	0.0674942	0.00983319	0.0264553	-0.0645945	0.0669772	-0.00348502	-0.00841041	0.220281	-0.0813516	0.07743	-0.0489351	-0.0747594	0.0178972	0.0233282	-0.0350999	-0.141336	-0.0931007	0.0109593	-0.0955081	0.246707	-0.0474596
F9X8P8	10.8889	13.5751	NaN	12.3123	11.5495	13.8408	NaN	12.4401	11.5314	13.1741	NaN	12.3545	11.4837	13.3389	NaN	12.3612	11.2954	13.1836	NaN	12.7477	12.3227	13.6015	NaN	12.8121	-0.0639592	-0.127417	NaN	-0.0672556	0.160923	-0.0297872	NaN	-0.0742393	0.0454601	NaN	0.223151	0.287673	-0.156748	-0.0946472	NaN	-0.118131	-0.145164	-0.0618731	NaN	0.21133	-0.0182021	0.0260521	NaN	0.0028356	-0.0897726
F9X8R6	12.083	12.0855	12.4887	12.8263	12.5507	12.3735	12.8518	13.0602	12.4605	11.5859	12.674	12.7393	12.9531	12.1428	12.6106	13.0619	12.5379	11.6822	12.6662	13.1753	13.229	12.2218	12.7097	13.1391	0.0063557	-0.179945	-0.0532605	-0.0489126	0.0383311	-0.0600681	0.0521042	0.0500941	-0.0654217	-0.0371785	0.0284809	0.13654	0.188908	0.146352	0.0763012	0.0868976	-0.0264283	-0.126195	0.00923725	0.143188	-0.235647	0.0833157	-0.0472037	-0.165846	0.0224046
F9X8R8	14.383	16.0679	15.997	16.7184	14.9924	15.7243	16.531	16.7916	14.851	14.1727	16.3827	16.4939	15.3269	14.8743	16.1628	16.7599	15.1879	15.1005	16.5856	16.7349	16.093	15.4855	16.6384	17.0022	-0.196972	0.580206	-0.260981	0.0933613	-0.023289	0.0685554	0.0152345	0.0316939	-0.0606295	-0.0445796	-0.084341	-0.498939	0.0593439	-0.344468	-0.0876017	0.0351121	0.120245	0.0698557	0.212588	-0.0470002	0.125013	0.12479	0.16534	-0.0525376	-0.036748
F9X8S5	15.0674	16.8776	15.2789	15.3513	15.4495	17.0948	15.4611	15.4622	15.3237	15.895	15.3361	15.2564	15.6877	16.4845	15.1199	15.3457	15.5487	16.3445	15.2704	15.5143	16.4142	16.8572	15.4609	15.7188	0.0445918	0.0351728	0.0825964	0.0349807	-0.00901643	0.0842543	0.00702815	0.0110053	0.0105609	-0.029502	-0.0544883	-0.131351	-0.0226789	-0.0889231	-0.0688315	-0.0704124	0.0382237	-0.0409303	-0.0408971	0.0410549	0.00336808	0.141777	0.049606	-0.0271894	0.00744506
F9X8V1	14.9321	15.1327	15.3026	16.0917	15.5447	15.0953	15.7646	16.2115	15.5213	13.8701	15.6054	15.9282	15.7363	14.3209	15.4461	16.0949	15.6631	14.4685	15.7862	16.0763	16.4385	14.7959	15.7813	16.3573	-0.148172	0.268643	-0.18689	0.0901883	0.0286955	0.0631336	0.0174057	0.0751117	-0.00283317	-0.0533013	0.0856387	-0.177893	-0.0315606	-0.274155	-0.0357555	-0.00642534	0.095216	0.0614451	0.181722	-0.0821003	-0.029818	0.0588266	0.0768198	-0.0739411	-0.00202945
F9X8V9	14.8535	14.9564	14.9044	14.2073	15.3636	15.1413	15.0619	14.3906	15.2229	14.0205	14.8594	14.2158	15.6055	14.5639	14.6774	14.3093	15.325	14.393	14.5897	14.374	16.1547	14.8893	14.9361	14.6789	-0.00830954	0.0454846	0.191167	-0.0302393	0.0660691	0.0623757	0.0909121	0.018174	0.048784	-0.0231089	0.0057666	-0.0742564	0.056105	-0.0780792	-0.0282234	-0.0280161	-0.0244882	-0.0608967	-0.238595	-0.0203962	-0.0951428	0.105372	0.00784813	0.0116937	0.042083
F9X8W0	11.5576	14.3245	12.6448	13.6778	11.7538	14.4446	12.8223	13.8905	11.788	13.1106	12.8227	13.6133	12.4734	13.6274	12.5079	13.933	12.0387	13.4929	12.7257	13.7696	13.1727	14.0631	12.9139	14.1505	-0.0140544	0.23048	0.0301892	-0.036199	-0.253538	0.182498	-0.050158	0.0416819	-0.0301938	0.0387496	-0.139013	-0.167328	0.214156	-0.197602	-0.0990725	0.119133	-0.0205913	-0.144121	-0.00398513	-0.101256	0.213041	0.096073	0.0842769	0.00683355	-0.0474523
F9X8X1	11.2097	12.4994	NaN	12.5655	11.2678	12.566	NaN	12.6461	11.1603	11.9289	NaN	12.3438	11.4179	12.2545	NaN	12.4662	11.0896	11.9274	NaN	12.579	12.1012	12.3891	NaN	12.7961	0.394329	-0.011633	NaN	0.124473	0.0167538	-0.113154	NaN	0.0703066	-0.0267108	NaN	-0.0104314	0.233922	-0.0850721	0.0124329	NaN	-0.074624	-0.213396	-0.126604	NaN	-0.0188818	-0.102184	0.0050357	NaN	-0.0745633	0.226294
F9X8X8	14.2236	6.91862	10.2097	12.7814	14.1576	7.56651	10.1058	12.9539	14.1629	NaN	9.98556	12.412	14.414	NaN	9.80679	13.1786	14.5336	NaN	10.4936	13.2978	14.5667	6.49514	10.5267	13.2839	0.439619	NaN	0.146591	-0.0781178	-0.0621402	NaN	-0.215103	-0.0404295	-0.376957	-0.246814	0.0235601	NaN	-0.0576562	NaN	-0.248694	0.21935	0.261952	NaN	0.315436	0.281441	-0.605334	NaN	0.248584	-0.00528574	0.290042
F9X8Y0	13.4363	14.2971	13.887	14.1335	13.7964	14.7996	14.0607	14.2517	13.7683	13.9962	14.0373	14.0955	14.1158	14.5245	13.784	14.0893	14.0367	14.1817	13.7541	14.2179	14.6755	14.4722	13.9016	14.4877	0.0238854	-0.331586	0.107819	0.045985	-0.0517099	0.00283626	0.0237092	0.0293873	0.0785071	0.0888121	0.000475451	0.183579	0.01573	0.164724	0.0124295	-0.0979843	0.136576	0.00998451	-0.140173	-0.0264539	-0.124957	-0.0295374	-0.092596	-0.0294412	0.0306584
F9X8Y2	NaN	11.2138	9.60718	11.4877	NaN	11.0416	10.0403	12.1924	NaN	10.268	9.45687	11.5179	NaN	10.6321	9.2353	11.9779	NaN	10.0059	10.1021	11.9936	NaN	10.9195	10.3824	11.8564	NaN	0.283482	-0.0719365	-0.22479	NaN	-0.0567816	0.103396	0.345048	-0.124157	-0.391516	NaN	0.153755	NaN	-0.0292429	-0.436203	0.165532	NaN	-0.467379	0.307975	0.124188	NaN	0.116166	0.488284	-0.285821	-0.110624
F9X8Z0	10.8855	12.5951	10.0709	7.13072	10.8976	13.0713	10.262	NaN	11.0477	12.1687	10.6244	7.32283	11.3286	12.9123	10.5985	7.87418	11.5304	12.792	10.4903	7.85947	11.4292	12.6939	10.4435	8.04691	0.258085	-0.360578	-0.219111	NaN	-0.16556	-0.0524549	-0.285834	NaN	NaN	0.165127	0.0649016	0.0290735	0.0135506	0.225496	0.3161	NaN	0.41527	0.293306	0.0852991	NaN	-0.586246	-0.134842	-0.0615806	NaN	0.153688
F9X922	15.9673	17.2332	16.2484	17.3691	16.4721	16.7219	16.621	17.4453	16.4606	15.4512	16.3053	17.1693	16.8165	15.8889	16.2104	17.4847	16.9895	16.657	16.4249	17.4413	17.1953	16.9421	16.7774	17.5445	-0.123879	0.500666	-0.0579508	0.08514	-0.0547651	-0.178769	0.0569134	0.0265701	-0.0441277	-0.170311	0.0141219	-0.465229	0.0377755	-0.574738	-0.0882793	0.101008	0.410656	0.381485	0.00355319	0.000503581	-0.28391	0.336584	0.256074	-0.169094	0.0660805
F9X930	17.0835	18.7374	17.8915	17.9662	17.6765	18.8209	17.9284	18.0197	17.7269	17.5582	17.7377	17.88	17.8955	18.0823	17.5381	17.9572	17.525	17.9083	17.5267	17.9713	19.0299	18.45	17.9902	18.3883	-0.180323	0.227713	0.247675	0.0608954	-0.023068	0.143158	0.0268043	-0.0205226	0.0451568	-0.0754674	0.107758	-0.135437	-0.0559546	-0.158395	-0.0981838	-0.0478814	-0.226508	-0.144387	-0.232157	-0.0909007	0.378095	0.0673477	0.131328	0.0532525	-0.0685156
F9X934	12.227	14.7587	12.1735	12.9215	12.7104	15.2322	12.3361	12.9315	12.7451	14.1613	12.3713	12.9468	13.2388	14.7036	12.276	13.0833	12.8068	14.5234	12.2697	13.2696	14.1016	14.95	12.7484	13.6554	-0.185554	-0.212947	-0.0641209	-0.0880941	-0.137838	0.0923872	-0.159293	-0.212889	0.00768428	-0.0355849	-0.0228288	0.00568849	0.138615	0.000904458	0.0460783	-0.026044	-0.093384	0.00869514	-0.0829401	0.103184	0.30099	0.105271	0.295861	0.216159	-0.367249
F9X955	12.8627	14.5113	13.5183	14.649	13.2854	14.6145	13.7476	14.9394	13.2266	13.5453	13.7421	14.5472	13.8657	13.9675	13.4643	14.8853	13.6989	14.061	13.8494	14.8607	14.6076	14.2913	13.8338	15.2073	-0.169422	0.0959445	-0.0493792	-0.0740646	-0.182371	0.0310847	-0.0778751	0.0815168	-0.105339	0.00516926	-0.160865	-0.0538983	0.146027	-0.178856	-0.0957533	0.062436	0.179147	0.102726	0.166728	-0.0191508	0.187485	0.00299881	0.0511104	0.0546012	-0.123279
F9X956	12.0387	13.0072	11.7989	13.3122	12.8063	13.2262	12.5253	13.4567	12.6852	12.1094	12.3243	13.4082	13.2827	12.6815	12.1994	13.8251	13.133	12.8468	12.4715	13.5347	13.3224	12.8475	12.0231	13.55	-0.280264	-0.0293696	-0.299929	-0.077193	0.0516514	0.0214675	0.168704	-0.0674665	0.0893366	0.0561525	0.0108106	-0.111079	0.27614	-0.0860999	0.1082	0.3359	0.326327	0.267163	0.257662	-0.0115571	-0.384664	-0.0620821	-0.290791	-0.26902	0.0799503
F9X964	9.97111	12.4691	9.16538	11.9722	10.3064	12.5731	8.98536	12.0827	10.1934	11.8401	9.05197	11.9363	10.0126	12.2008	8.53352	12.0423	9.99124	12.5102	9.71344	12.1179	11.0432	12.564	8.59085	12.6942	0.27718	-0.140634	0.283537	-0.0436315	0.176752	-0.204743	-0.154264	-0.0679788	-0.00897212	0.000857219	0.144094	0.0465207	-0.368917	-0.139918	-0.340703	-0.0733038	-0.190371	0.357511	0.716577	-0.0547768	-0.0387374	0.081264	-0.506004	0.248663	0.147816
F9X969	9.41602	11.725	9.56146	12.1598	10.0772	11.7865	10.1471	12.1415	9.87237	10.5365	9.99308	12.1888	10.4999	11.2883	9.43677	11.9916	10.0963	11.0631	9.66936	12.3251	11.318	11.5332	10.1788	12.5693	-0.23823	0.15275	-0.144725	0.0555923	-0.0127496	0.0461178	0.183119	-0.0975859	0.155064	0.11763	-0.137256	-0.219647	0.15809	-0.0149666	-0.26179	-0.212481	-0.0456038	-0.0522103	-0.151835	0.064003	0.27575	0.0879553	0.2576	0.0354077	-0.207831
F9X9A0	6.91468	7.80349	7.44303	9.67708	NaN	7.30743	8.21043	9.95912	NaN	7.36142	8.61467	9.85047	6.39984	7.15056	7.54728	9.91325	NaN	7.72812	8.38111	9.14606	8.41257	7.49466	8.29053	10.3692	NaN	0.0790448	-0.513241	-0.0169947	NaN	-0.585094	-0.00361374	0.130199	0.226894	0.48914	NaN	0.453066	NaN	-0.30492	-0.401367	0.119377	NaN	0.460691	0.309829	-0.704879	NaN	-0.102788	0.119253	0.245403	-0.237686
F9X9B3	11.8145	13.1738	12.1892	13.4372	12.3228	13.143	12.8125	13.6673	12.0896	11.9024	12.5571	13.2022	12.8039	12.5646	12.4975	13.5929	12.4157	12.6447	12.9076	13.6552	13.1345	12.6171	12.5245	13.5099	-0.0566281	0.249378	-0.267268	0.0515447	0.0159919	0.0504313	0.0982382	0.146807	-0.112981	-0.0686421	-0.136885	-0.205939	0.245189	-0.0908295	0.0485922	0.107446	0.0569206	0.177302	0.336048	0.11265	-0.124589	-0.180343	-0.146968	-0.305466	0.183598
F9X9B7	10.1051	9.74985	10.1176	9.81889	10.1374	10.2065	10.4189	9.94162	10.2337	9.4884	10.5625	10.1765	10.6825	9.74719	10.4244	10.0116	10.5385	9.80789	10.6704	10.5866	10.3227	8.83045	10.4472	10.4884	0.327542	-0.138694	-0.197622	-0.226621	-0.0759238	0.149898	-0.154133	-0.238726	0.201547	0.0779972	0.100783	0.415945	0.217278	0.127601	0.116731	-0.133652	0.273222	0.376347	0.240112	0.384194	-0.842901	-0.931097	-0.0830842	0.0132578	0.402107
F9X9B9	13.5291	14.1053	13.2555	13.9083	14.3034	14.7628	14.2302	14.64	14.2502	13.6924	14.2257	14.5997	14.7298	14.2718	13.9002	14.8057	14.7249	14.2528	14.1074	15.0151	15.2982	14.1907	13.7874	14.5834	-0.384445	-0.357468	-0.537324	-0.558621	-0.0458046	0.131913	0.179571	0.0382032	0.203267	0.263645	-0.0187352	0.0456834	0.128661	0.0779858	0.115002	0.238982	0.3237	0.247017	0.199543	0.391332	-0.00337642	-0.145132	-0.220437	-0.313163	-0.288938
F9X9C0	13.4418	15.3838	14.1691	15.0634	14.2093	15.8846	14.9176	15.7691	14.3117	15.0587	14.9705	15.6437	14.6643	15.691	14.7467	15.8364	14.52	15.5347	15.0673	15.8534	15.0696	15.4241	14.4834	15.6301	-0.368617	-0.362474	-0.431725	-0.444194	-0.0368122	-0.0297476	0.0589179	0.126711	0.20666	0.200334	0.145978	0.128444	0.166333	0.213601	0.153478	0.229039	0.221933	0.245392	0.351429	0.188984	-0.128814	-0.195215	-0.332434	-0.3072	-0.160837
F9X9C1	13.8037	15.8745	14.5172	15.3095	14.6313	16.116	15.3095	15.9196	14.7961	15.2758	15.3891	15.8083	15.1578	15.8093	15.0326	16.1	15.2088	15.9565	15.4723	16.207	15.6082	15.9127	14.9975	15.8769	-0.504862	-0.19978	-0.477567	-0.435582	-0.113018	-0.126345	0.0569325	0.0396399	0.133712	0.225056	0.132175	0.0175684	0.161622	0.00394572	0.0453772	0.255086	0.41254	0.339192	0.362523	0.305027	-0.0884575	-0.0345814	-0.212322	-0.297883	-0.246137
F9X9D0	12.5738	15.7604	14.7278	14.5372	13.2119	15.9069	14.8252	14.4685	13.0567	14.6874	14.7369	14.2411	13.6267	15.2689	14.5441	14.3824	13.1124	15.0668	14.6878	14.5244	14.5993	15.6018	15.1376	14.9002	-0.23057	0.128149	0.0761442	0.153374	-0.0281916	0.106649	-0.0842362	-0.0501864	-0.0722478	-0.0840042	-0.103078	-0.128688	0.13472	-0.0943748	-0.0999906	-0.101281	-0.17971	-0.108355	-0.0788702	-0.016344	0.40683	0.096619	0.270957	0.0866849	-0.183498
F9X9E4	14.9982	15.8207	15.2434	15.8836	15.2845	15.9498	15.4139	15.966	15.1992	14.7527	15.0916	15.7165	15.6902	15.2264	14.9448	15.8756	15.3143	15.0173	15.1566	15.9273	16.6925	15.4835	15.4928	16.1626	0.0274817	0.195451	0.14448	0.0868282	-0.121976	0.156475	0.0571641	0.0343074	-0.00984108	-0.17666	-0.12692	-0.0564182	0.0318242	-0.129866	-0.146485	-0.0209797	-0.144097	-0.150908	-0.0573314	-0.026407	0.333687	-0.0147351	0.178833	-0.0639078	0.00509092
F9X9E7	13.3947	13.8459	12.691	13.0479	14.0694	13.9469	12.794	13.2881	13.6498	13.445	12.9483	13.0753	14.2015	13.6912	12.6997	13.3046	14.0567	13.5649	12.7542	13.3951	14.7318	14.0292	12.8729	13.6688	-0.0635237	-0.158124	0.0225534	-0.123622	0.175392	-0.225182	-0.132234	-0.018241	-0.0257121	0.110635	-0.163813	0.257098	0.055648	-0.0438472	0.0388739	0.0332987	0.110791	0.0178642	-0.0292429	0.0667269	-0.114495	0.152191	-0.0105858	0.0675496	-0.104344
F9X9G6	17.3435	18.3415	17.4057	17.86	17.508	17.9918	17.5912	17.9828	17.3124	16.9133	17.4733	17.61	17.6942	17.4156	17.3219	17.9089	17.52	17.4401	17.4125	17.9612	18.2914	17.8517	17.6145	18.0712	0.291008	0.43236	0.0607231	0.0861019	0.0197386	-0.0854301	-0.0115063	0.0740275	-0.0933863	-0.0409384	-0.0954965	-0.179735	-0.0458686	-0.224603	-0.0153855	0.0352018	-0.0201957	-0.012094	-0.0474925	0.0304038	-0.149186	0.0695027	0.0545996	-0.132349	0.256906
F9X9G8	9.83629	7.89451	7.8448	12.7315	10.622	9.04639	8.02054	12.7477	10.7469	7.46132	7.83902	12.4394	11.0371	9.17961	7.21199	12.8447	10.5802	8.51598	7.88533	12.7365	11.6842	7.88905	9.37519	12.9343	-0.355749	-0.686789	-0.05977	0.117579	-0.00579428	0.297002	-0.141809	-0.00101794	-0.104015	-0.234821	0.199522	-0.303899	0.157421	0.867267	-0.684964	0.131004	-0.0995492	0.391679	-0.134253	-0.0342609	0.104149	-0.565259	1.25562	-0.10929	-0.417487
F9X9H8	NaN	11.727	7.03606	11.7039	NaN	11.5698	8.14654	11.7174	NaN	11.36	8.59492	11.5937	NaN	11.5867	9.32625	12.0345	NaN	11.8731	9.36155	11.9222	NaN	11.8857	8.93425	12.4798	NaN	-0.19018	-1.40563	-0.0795543	NaN	-0.51548	-0.552921	-0.20092	-0.119281	-0.0160337	NaN	0.258852	NaN	-0.0614995	0.89218	0.151275	NaN	0.412859	0.804846	-0.0181403	NaN	0.095449	0.277556	0.26662	-0.771662
F9X9I8	7.06264	9.40637	8.43104	7.49857	7.2114	9.5046	8.22848	6.23168	7.10056	9.3051	9.00997	7.99814	8.0398	9.46883	8.19402	6.05105	7.43045	8.98108	9.1733	NaN	8.62308	10.0386	8.14792	7.41329	0.0437221	-0.294559	0.0251565	NaN	-0.243235	-0.364415	-0.435174	NaN	NaN	0.434822	-0.273737	0.420259	0.33327	0.0368538	-0.204243	NaN	-0.0761424	-0.262846	0.652408	NaN	0.216122	0.464708	-0.47297	NaN	-0.144514
F9X9J2	13.3362	14.6395	12.9886	12.2133	14.0137	15.4507	13.1215	12.3395	13.9413	14.7676	13.0798	12.3068	14.1144	15.1332	12.7585	12.4706	13.6711	14.5989	12.4421	12.6719	14.9502	14.5971	12.872	12.6609	-0.109187	-0.475127	0.236435	-0.105381	0.132539	0.167945	0.111534	-0.114052	0.0585795	0.158375	0.140532	0.469016	-0.0186304	0.287506	0.013912	0.0520633	-0.261993	-0.058764	-0.425112	0.196287	0.11674	-0.390577	-0.0951447	-0.0874967	0.000804624
F9X9J3	13.2552	15.0414	13.4308	14.2096	13.6176	15.2456	13.8052	14.3622	13.6103	14.1895	13.6264	14.1603	13.9842	14.6704	13.6054	14.2447	13.8397	14.7191	13.6686	14.3416	14.3823	14.8751	13.9139	14.5419	0.0327334	0.00100842	-0.119301	0.0246685	-0.0406093	0.0371943	-0.00268026	0.0424421	0.0458343	-0.0930177	0.0324835	-0.0347463	0.0740699	-0.100956	0.0628385	-0.0400667	0.129546	0.135776	0.00339345	-0.000206906	-0.228224	-0.0382768	0.148767	-0.0726712	0.0323784
F9X9J4	14.9732	15.8683	15.4421	16.232	15.6031	15.6597	15.6941	16.3306	15.6275	14.491	15.4318	16.0211	15.789	15.093	15.2014	16.1943	15.5342	14.9432	15.4398	16.1262	16.6997	15.3917	15.7582	16.5603	-0.172144	0.376964	0.0724751	0.113012	0.0219642	0.000275791	0.0666795	0.0767677	-0.0273869	-0.107165	0.126736	-0.184175	-0.0439778	-0.129297	-0.160681	-0.024455	-0.0988284	-0.091141	-0.0448415	-0.149618	0.16625	0.0273733	0.173533	0.0116803	0.00286742
F9X9J8	NaN	12.4403	10.9547	12.2806	8.42916	12.3868	11.6415	12.7501	8.00118	11.289	11.5166	12.4266	8.30488	11.9441	11.3616	12.4526	8.76248	11.9966	11.501	12.6024	8.77149	12.1848	11.5788	12.7371	NaN	0.149906	-0.34608	-0.135865	NaN	-0.0717487	0.0829052	0.198821	0.0806766	0.0465352	NaN	-0.185348	NaN	-0.0774046	0.0683944	-0.0636512	NaN	0.163203	0.0851918	0.0291013	NaN	0.0213926	0.0630536	-0.109083	-0.102468
F9X9J9	14.5741	15.4089	14.1313	14.3234	14.8366	15.8086	14.2747	14.6194	14.6441	14.7983	14.3602	14.444	15.0606	15.4396	14.045	14.5804	14.8999	15.0841	14.2683	14.7159	15.946	15.3076	14.3684	15.3193	0.139639	-0.149125	0.0148762	-0.218533	-0.033608	0.0825372	-0.0995229	-0.0574184	-0.027454	0.0745459	-0.14572	0.0563396	-0.0614793	0.150546	-0.0638064	-0.061354	-0.0222824	-0.0168686	0.0368914	0.0170571	0.123451	-0.123429	0.0370158	0.347702	-0.149471
F9X9K6	14.6289	15.6123	14.9981	15.8271	15.1005	15.5883	15.1643	15.9434	15.2251	14.3414	15.0454	15.5775	15.42	14.9088	14.8667	15.9317	15.0658	14.8289	15.1525	15.8138	16.3448	15.3785	15.3584	16.2196	-0.109538	0.252406	0.0254001	0.0667296	-0.0737016	0.0603948	-0.0661575	0.048133	-0.112426	-0.0965078	0.131279	-0.202388	-0.0060557	-0.182129	-0.098293	0.0715021	-0.160322	-0.0739212	0.0648476	-0.103492	0.218339	0.145638	0.170711	0.0295534	-0.082311
F9X9M4	15.8984	17.043	15.984	16.3343	16.4912	17.2947	15.9645	16.3954	16.3521	16.2008	15.8911	16.2693	16.6593	16.7619	15.6496	16.3863	16.3745	16.4329	15.6552	16.4256	17.6089	17	16.025	16.8912	-0.106597	0.00397244	0.247302	0.00903297	0.0504757	0.0875921	-0.029925	-0.0646775	0.0145576	-0.0148662	-0.00830185	-0.0221626	-0.0333238	-0.00820599	-0.0794031	-0.0387468	-0.118149	-0.149115	-0.196463	-0.0564556	0.215896	0.0879191	0.0733552	0.136289	-0.0899375
F9X9P3	9.69248	11.4965	9.08026	11.2614	9.66345	11.5547	9.27994	11.1288	10.1026	10.5369	9.37747	10.9112	10.2731	11.2504	9.16113	11.3367	9.6632	10.7334	8.55735	11.1794	10.6455	11.3876	9.25817	11.6144	0.244823	0.0864082	0.086112	0.147908	-0.219921	-0.0234459	0.028016	-0.119611	-0.131867	0.21406	0.299602	-0.0570803	0.137834	0.109281	0.174607	0.123342	-0.272128	-0.219651	-0.55181	-0.0909867	-0.190212	0.104487	0.0490151	0.0712149	0.132687
F9X9P8	11.7715	12.9906	6.47721	12.9115	12.2125	13.0739	8.82407	13.244	12.0021	12.1789	6.71232	12.9557	12.6724	12.6885	8.66103	13.2396	12.5944	12.5774	7.78313	12.9964	12.6657	13.0706	6.62453	13.6192	0.0108191	-0.0228993	-0.911599	-0.124415	0.0160964	-0.107673	1.17749	0.0731954	-0.00978291	-0.845752	-0.114012	-0.0184614	0.224104	-0.0559908	1.27984	0.10388	0.346028	0.0209003	0.279309	-0.19643	-0.483036	0.184124	-0.979287	0.153553	0.0191377
F9X9Q3	14.2188	12.0508	13.4273	13.2753	14.559	12.6285	13.5727	13.4424	14.4795	11.3904	13.5122	13.3407	14.9141	12.2813	13.1669	13.4415	14.5462	11.7355	13.4017	13.4705	15.7367	12.2038	13.5754	13.8974	0.0354835	-0.247751	0.109517	-0.0776025	-0.0600665	0.16188	-0.00287019	-0.0452681	0.0583371	0.0251853	-0.0591554	-0.0920795	0.043142	0.25173	-0.143322	-0.0111273	-0.124752	-0.106032	-0.0311297	-0.0391806	0.165349	0.032252	0.0426202	0.114841	-0.133854
F9X9Q5	9.97971	12.5476	10.5995	NaN	10.8029	12.9412	11.0326	NaN	10.2511	12.4537	10.815	NaN	10.7609	12.7602	10.4918	NaN	9.9528	12.0508	10.2882	NaN	11.5861	12.5336	10.5024	NaN	-0.0168086	-0.250437	0.102867	NaN	0.370682	-0.0248936	0.278148	NaN	NaN	0.149044	-0.100768	0.47179	0.0767579	0.231175	0.002699	NaN	-0.531397	-0.290199	-0.323514	NaN	0.201533	-0.137436	-0.209245	NaN	-0.00641037
F9X9R0	17.3918	18.9256	17.6291	18.6944	18.0242	18.5868	18.0179	18.7434	17.9172	17.2449	17.8169	18.3309	18.2479	17.8846	17.7079	18.6012	18.173	17.9564	18.1819	18.5348	19.0708	18.3828	18.0186	18.816	-0.186602	0.511944	-0.141416	0.199387	0.0100362	0.00503096	-0.0103851	0.11353	-0.0936117	-0.122831	-0.016591	-0.352725	-0.0181545	-0.26009	-0.0549271	0.00642145	0.106918	-0.000293866	0.296414	-0.117052	0.104393	0.0961343	0.0331455	-0.108675	0.0645787
F9X9S8	15.5016	15.9296	13.8495	15.0889	15.7936	16.2783	13.9495	15.4616	15.7593	15.5555	13.8319	15.2025	16.0821	15.8697	13.6365	15.31	15.8665	15.6565	13.4808	15.4212	16.7738	15.8218	13.9082	15.6597	0.0978226	-0.172456	0.198347	-0.143322	-0.0458249	0.00812009	0.0405318	0.0945436	0.0407811	0.0114794	0.000178695	0.269553	-0.00925734	0.0366153	-0.00702371	-0.0219752	-0.0249301	0.0114308	-0.285379	0.0321258	-0.017989	-0.153263	0.0420445	-0.0021534	0.0279381
F9X9V6	12.11	12.8882	13.3455	NaN	12.2474	13.2167	12.6105	NaN	12.4741	12.2586	13.4803	NaN	12.616	12.7361	12.7507	NaN	12.5078	12.6237	12.6568	NaN	13.1466	12.7017	12.5386	NaN	0.152078	-0.0994629	0.57337	NaN	-0.146212	0.0609609	-0.419453	NaN	NaN	0.538847	0.160845	0.0870113	-0.0295739	0.0174356	-0.0138046	NaN	0.062201	0.0930774	-0.230382	NaN	-0.199337	-0.159022	-0.448577	NaN	0.477641
F9X9W7	12.1616	11.8538	NaN	11.315	12.8565	12.0392	NaN	12.02	12.7613	11.8451	NaN	11.4242	13.2273	11.4183	NaN	11.9403	13.3235	11.3641	NaN	12.0571	12.8782	11.1163	NaN	11.6468	-0.147359	-0.00252844	NaN	-0.293792	0.111809	0.0148061	NaN	0.276397	-0.114099	NaN	0.09691	0.804921	0.230682	-0.16907	NaN	0.231714	0.526805	-0.035164	NaN	0.291447	-0.818846	-0.612965	NaN	-0.391666	0.459932
F9X9Y0	12.3512	15.4131	13.3813	13.9843	12.5672	15.8223	13.6536	14.0202	12.7732	14.9572	13.423	13.8527	13.1278	15.3054	13.4597	13.9815	12.8109	15.2636	13.5511	14.0119	14.4241	15.6066	13.9253	14.4317	-0.0988497	-0.231762	-0.0594808	0.062381	-0.318485	0.00935382	-0.0448983	-0.0365884	0.00128289	-0.187035	-0.0321641	0.128466	-0.00980173	-0.070516	0.0265552	-0.0402617	-0.126754	0.0757443	-0.00465922	-0.0668807	0.586054	0.0887146	0.269518	0.0800669	-0.338016
F9X9Z1	14.1931	15.6076	14.5296	15.1722	14.5105	15.6822	14.749	15.1091	14.4204	14.6354	14.6175	14.9795	14.7655	15.2159	14.4689	15.4142	14.5627	15.0602	14.5198	15.3529	15.3831	15.5426	14.739	15.6661	0.112999	0.0668054	0.0504921	0.0149357	-0.0053424	-0.0267237	0.0121963	-0.182961	-0.107199	-0.0308008	-0.0151621	-0.0892897	-0.00225642	-0.0559782	-0.00249757	0.157179	-0.00515754	-0.0235761	-0.0743146	0.0388284	-0.0850809	0.128762	0.0449246	0.0792162	0.0193526
F9X9Z4	15.9523	16.8408	16.4576	16.3815	16.4374	17.322	16.4785	16.5966	16.2473	16.3531	16.2866	16.4702	16.5648	16.8284	16.0731	16.4824	16.0571	16.2919	15.9706	16.5004	17.8914	16.7628	16.4099	16.9693	-0.0136997	-0.142504	0.303149	-0.0601373	0.0357384	0.170602	0.0662237	0.0201172	0.0990604	-0.0371639	-0.0740283	0.185853	-0.0888345	0.113988	-0.07372	-0.0589898	-0.396581	-0.2344	-0.298915	-0.0980342	0.537405	-0.0935385	0.040426	0.0979837	-0.123867
F9XA00	12.1055	14.0787	8.93148	9.38787	12.6306	14.3174	8.43584	9.2286	12.7743	13.0803	8.92065	9.34541	12.9288	13.6041	8.50438	7.89984	12.7236	13.3718	9.54632	9.01282	13.6909	13.9304	9.31313	10.1101	-0.144334	0.0981338	0.114417	0.348872	-0.0550156	0.16873	-0.638997	0.0547688	0.376917	-0.0656744	0.169013	-0.0842608	-0.00869579	-0.10755	-0.305057	-1.23895	-0.0139201	-0.151817	0.614243	-0.183032	0.0529519	0.0767643	0.281068	0.64142	-0.158778
F9XA02	14.0012	14.5841	13.5625	14.1907	14.3594	14.6431	13.7879	14.3486	14.1625	13.7395	13.4599	14.1863	14.571	14.2458	13.3939	14.2628	14.264	14.0205	13.5442	14.3029	15.1585	14.5183	13.8203	14.6644	0.140878	0.0420991	0.0925917	-0.0101473	0.0633331	-0.067056	0.0602392	0.0129297	0.0559537	-0.179211	-0.0532609	0.0135112	0.0230183	-0.0273055	-0.0683424	-0.037857	-0.0840288	-0.0644892	-0.0406626	-0.0548267	-0.0899394	0.10324	0.135385	0.0339476	0.0206968
F9XA05	10.0974	12.7031	9.30111	11.2374	10.3033	13.086	9.4653	11.3617	10.2681	12.4098	9.06091	11.6373	10.6866	13.0255	9.66954	11.3876	10.8501	12.5269	9.59066	11.317	11.5996	12.7677	9.67225	11.8854	0.0222598	-0.300197	-0.0339483	-0.10857	-0.207509	-0.0853999	-0.127529	-0.119074	0.361895	-0.443409	-0.162416	0.22253	-0.076135	0.29109	0.342105	-0.0581646	0.287318	-0.0194491	0.140593	-0.185801	0.136483	-0.108574	0.122188	0.109715	-0.170067
F9XA11	14.3072	15.6323	14.7081	15.3648	14.832	15.6948	15.1808	15.5912	14.7588	14.6759	15.0981	15.4625	15.2126	15.1583	14.8758	15.513	15.0208	15.0852	15.2501	15.6352	15.8391	15.3498	15.185	15.7527	-0.128806	0.116086	-0.216637	-0.0633004	-0.0397753	0.0105112	-0.00172244	0.0282133	0.104857	0.00405712	-0.0325347	-0.024236	0.0889563	-0.0889328	-0.0412852	-0.0149536	0.0971226	0.0260023	0.210312	0.0502596	0.0150372	-0.039431	0.0452748	-0.105076	-0.0521155
F9XA20	16.1956	15.8578	15.9151	16.7917	15.7042	15.2194	15.2209	16.0958	15.0278	14.0541	14.6373	15.482	14.5325	13.7884	13.4583	15.0096	13.8035	13.1419	13.0249	14.5905	15.4591	14.2621	14.4332	15.6901	1.63418	1.22035	1.59172	1.30688	0.707124	0.413842	0.639729	0.476151	0.0676435	0.144674	0.111059	0.232751	-0.716516	-0.580061	-0.857466	-0.575045	-1.24554	-1.03854	-1.41348	-1.05121	-0.49031	-0.248342	-0.105176	-0.224418	1.70534
F9XA25	13.031	13.8367	12.7327	12.3261	13.5713	14.8558	13.0319	12.4472	13.6558	14.0954	13.0884	12.809	13.9834	14.7237	12.6464	12.5032	13.9402	14.2178	12.3708	12.6416	14.7616	14.4339	13.0587	13.3489	-0.233795	-0.773973	0.0361816	-0.228083	-0.129247	0.0769979	0.0775242	-0.24191	0.325299	0.222535	0.0355715	0.300773	0.0310239	0.381908	-0.0425811	-0.150794	0.187738	0.064099	-0.440747	-0.0694677	0.108708	-0.0498047	0.147088	0.364956	-0.442654
F9XA30	13.6475	14.9697	13.3731	14.4437	14.0626	14.9653	13.6872	14.688	13.8874	13.4167	13.5603	14.3123	14.4779	14.1294	13.3872	14.5934	14.2951	14.2225	13.5321	14.6681	14.8621	14.6646	13.5245	14.7058	0.00111163	0.324793	-0.0127047	0.00021641	-0.019429	0.152388	0.04354	0.109698	-0.0606176	0.00522552	-0.114312	-0.412108	0.143929	-0.246458	0.00898785	0.0501606	0.161028	0.0346367	0.0312565	0.0678112	-0.172328	0.146748	-0.0763052	-0.167269	0.145642
F9XA39	NaN	11.1416	10.7816	12.0389	NaN	10.666	11.5063	12.3686	NaN	9.95922	11.1459	12.2379	NaN	10.9344	10.9417	12.1408	NaN	10.5953	11.3131	12.0813	NaN	11.0587	11.1826	12.2924	NaN	0.165565	-0.238695	-0.0293446	NaN	-0.478066	0.228232	0.165554	0.240178	-0.0436342	NaN	-0.200721	NaN	0.227285	-0.0709731	-0.0271566	NaN	0.0762339	0.177795	-0.143737	NaN	0.209703	-0.0527248	-0.205494	-0.0179861
F9XA48	14.8013	14.8995	14.5758	14.4427	15.1631	15.4899	14.3578	14.3846	15.128	14.3085	14.2993	14.3859	15.3833	14.8106	14.0325	14.3278	15.1292	14.5102	13.8136	14.5102	16.1653	14.9031	14.2731	14.8781	0.0653026	-0.170958	0.475359	0.0795833	-0.00860936	0.251341	-0.000432447	-0.113358	0.0933352	0.0295972	0.0366676	0.0541129	-0.0402266	0.00912577	-0.06032	-0.135129	-0.094466	-0.103243	-0.401849	-0.00975096	0.0413318	-0.0403781	-0.0423539	0.0853195	0.101342
F9XA57	10.2584	8.39051	NaN	10.2446	10.3323	8.13556	7.09128	10.7731	9.721	9.03406	NaN	10.6261	10.1609	8.97209	NaN	10.8264	9.93314	9.4106	NaN	10.7342	11.5246	7.86065	NaN	11.053	0.49579	-0.49356	NaN	-0.33985	0.133883	-0.916599	NaN	0.053767	0.112129	NaN	-0.397038	0.966072	-0.289388	0.356978	NaN	0.142147	-0.317191	0.983533	NaN	-0.00710769	0.373945	-0.896423	NaN	0.0389144	0.048648
F9XA60	12.1123	13.8971	12.5382	12.1986	12.292	13.9908	13.2085	12.3649	12.3192	12.97	13.4114	12.2382	12.9225	13.883	13.375	12.5961	12.7831	13.7455	13.4851	12.8218	13.7399	13.7862	13.2881	12.8946	-0.0234844	-0.0651659	-0.554613	-0.195279	-0.279446	-0.139523	-0.142061	-0.163875	-0.0852071	0.149288	-0.171917	-0.176167	0.0991395	0.189731	0.289834	0.10235	0.159621	0.240216	0.277236	0.271007	0.216088	-0.0490904	-0.0196851	0.0710038	-0.264215
F9XA69	14.0125	16.0676	15.0679	16.312	14.6531	15.5379	15.695	16.4984	14.5053	14.2136	15.3963	16.1564	14.7712	14.7259	15.2816	16.4494	15.0718	15.1503	15.4937	16.4368	15.4989	15.4788	15.7263	16.5484	-0.180631	0.621718	-0.250676	0.0368367	0.024325	-0.076038	0.11869	0.0884505	-0.0482378	-0.0915344	-0.0431415	-0.416193	-0.109458	-0.450982	-0.0293128	0.0744604	0.391081	0.161507	0.0601126	0.00486029	-0.0821756	0.159989	0.19272	-0.15637	0.0282712
F9XA70	11.9024	13.2618	8.28221	12.7182	12.1943	13.1946	8.64677	12.6758	12.1293	12.2123	8.31583	12.5674	12.6176	12.8285	7.7117	12.5646	12.0861	12.2885	8.05365	12.7306	13.376	12.7995	9.03733	13.0447	0.0771754	0.247445	0.0658657	0.126445	-0.0665923	0.0121956	0.172657	-0.050869	0.046151	-0.0697791	-0.0513256	0.014016	0.104796	0.0830978	-0.497021	-0.12693	-0.226807	-0.268858	-0.277702	-0.018049	0.162753	-0.0878956	0.605979	0.0232523	-0.0467897
F9XA78	14.6519	15.0696	NaN	15.3827	14.6706	15.4179	NaN	15.3664	14.6726	14.9121	NaN	15.3065	14.968	15.4726	NaN	15.7803	14.9367	15.1784	NaN	15.8411	15.1178	15.6663	NaN	16.0254	0.374748	-0.466704	NaN	-0.10926	-0.0423192	-0.286485	NaN	-0.2604	-0.114991	NaN	0.0400137	0.191909	0.00322625	0.205235	NaN	0.188592	0.171805	0.0991168	NaN	0.192289	-0.547474	0.256928	NaN	0.103769	-0.00481324
F9XA81	14.6179	15.6204	15.2288	16.1703	15.0819	15.2346	15.6892	16.3432	15.0422	14.1148	15.6074	15.984	15.3443	14.7679	15.503	16.2249	15.2663	14.7761	15.7492	16.3042	15.893	15.1515	15.6207	16.4326	-0.0306122	0.426073	-0.212682	0.0521839	-0.00239999	-0.127902	-0.0100413	0.0902536	-0.0635913	-0.00332051	0.0382573	-0.263487	0.00818282	-0.157541	0.0691684	0.00704006	0.130131	0.0387041	0.192674	0.0292941	-0.143559	0.0841536	-0.035799	-0.11518	0.111337
F9XA86	15.404	15.4254	15.6265	15.5396	15.8077	15.9102	15.5249	15.6416	15.7238	15.0151	15.5281	15.6128	16.0766	15.536	15.2926	15.691	15.5971	15.0458	15.2026	15.7852	16.8233	15.5153	15.5744	16.1504	0.0576922	-0.232713	0.293203	-0.0720117	0.0255864	0.08399	-0.0661107	-0.104922	0.071604	0.0255157	0.0220924	0.173073	0.0426876	0.14687	-0.0330465	-0.020493	-0.236936	-0.15536	-0.245668	0.0167346	0.088878	-0.0158599	0.0261059	0.109088	-0.0405104
F9XAA2	11.1589	10.2335	NaN	11.0311	11.2627	10.3981	NaN	10.7255	11.6044	10.0139	NaN	10.8368	11.6177	10.142	NaN	10.826	11.4258	9.10748	NaN	10.6782	12.7138	9.85336	NaN	11.2411	0.0873694	0.025288	NaN	0.266465	-0.244471	0.0218096	NaN	-0.174073	0.14266	NaN	0.177499	0.621758	-0.141359	0.202729	NaN	-0.0384839	-0.133325	-0.643727	NaN	-0.243295	0.254286	-0.227858	NaN	0.0467266	0.101989
F9XAA9	15.1308	16.0524	15.0937	15.591	15.569	16.3281	15.3244	15.5595	15.6463	15.2001	15.3122	15.3947	15.9716	15.8842	15.1655	15.5379	16.0072	15.6417	15.4515	15.7392	16.8062	15.9727	15.3517	15.8519	-0.165319	-0.0442724	-0.0646062	0.103745	-0.162854	0.0633056	-0.0916191	-0.0625938	-0.0220484	-0.0152925	-0.005173	-0.0805087	-0.0121734	0.056511	0.0148447	-0.0491573	0.223439	0.00197142	0.178216	0.0950641	0.12208	0.00299309	-0.021543	-0.0650096	-0.0522433
F9XAB3	13.3491	14.5257	12.5222	13.8925	13.816	14.9039	12.7988	14.1172	13.898	13.9555	13.272	13.9538	14.1928	14.6627	12.6919	14.344	14.168	14.3148	12.6417	13.9897	14.1374	14.3115	12.5064	14.0185	-0.0186921	-0.170121	-0.0917416	-0.0349737	0.0124298	0.0399745	-0.0729095	0.0548005	0.0968221	0.488821	0.174823	0.0757314	0.137388	0.235803	0.085542	0.31671	0.312533	0.0759762	-0.0872082	-0.0946257	-0.618481	-0.257364	-0.322504	-0.338733	0.305388
F9XAB4	12.4352	14.0917	7.04538	11.7351	12.905	14.4276	NaN	12.1054	12.9116	13.5861	NaN	12.2386	13.1763	14.038	6.5519	12.4271	12.9404	13.7621	6.21016	12.4172	13.8324	14.0092	6.32921	12.5275	-0.0391799	-0.144255	NaN	-0.381555	-0.00513402	0.0235551	NaN	-0.146175	0.192372	NaN	0.0817765	0.166287	0.0142655	0.0709989	NaN	0.21065	-0.0216795	-0.0168611	NaN	0.143621	-0.0300487	-0.0997246	NaN	-0.0189136	-0.138768
F9XAD1	12.9271	13.3501	12.9865	12.7791	13.2511	13.7353	12.8608	12.7261	13.0445	12.5953	12.9018	12.714	13.6424	13.2196	12.5636	12.6571	13.2721	12.8872	12.5833	13.0582	14.2462	13.188	12.9382	13.287	0.0889665	-0.0626501	0.305687	0.0340105	-0.022773	0.154503	-0.0777735	-0.153883	0.0393596	0.0517682	-0.149027	-0.00139046	0.1166	0.0758234	-0.109597	-0.187876	-0.0537685	-0.0685714	-0.212467	0.156168	0.0200022	-0.0977144	0.0423829	0.112221	0.0722804
F9XAE8	14.5599	16.2673	15.278	15.5066	15.0755	16.3672	15.6172	15.7738	14.9674	15.3027	15.4384	15.4964	15.1577	15.9226	15.3988	15.669	15.0069	15.6345	15.468	15.7444	16.0356	16.0363	15.5171	16.0083	-0.0148966	0.0953947	-0.0500035	-0.0680543	0.0650496	0.0271704	0.0313887	0.0643033	-0.00771725	-0.0588487	0.0372331	-0.0531063	-0.104659	0.0196043	0.0784462	-0.00540809	-0.0554893	-0.0804637	0.0249244	0.0129416	0.0727621	-0.0085993	-0.025907	0.00393471	-0.0199375
F9XAF0	13.8628	14.4965	13.7813	14.7761	14.26	14.4776	13.997	14.8267	14.1524	13.2356	13.7765	14.4831	14.5342	13.9792	13.6015	14.8067	14.1996	13.7111	13.6847	14.8553	15.5565	14.1887	14.0285	15.1183	-0.00569504	0.231586	0.0945651	0.0902113	-0.0442076	0.0445306	0.0525356	0.00599427	-0.132348	-0.0794221	-0.0715387	-0.213242	-0.0218937	-0.016838	-0.0775338	0.0209958	-0.156608	-0.0968207	-0.116957	0.0124862	0.299943	0.0507846	0.126813	0.00266013	-0.0173834
F9XAG4	15.0736	15.6489	14.4574	15.2988	15.5676	15.9138	14.6355	15.4344	15.5662	14.6647	14.4894	15.205	15.9873	15.2645	14.358	15.4704	15.7217	15.1427	14.4333	15.4812	17.1475	15.7608	14.7764	15.7942	-0.211359	-0.000446573	0.0573484	-0.0234284	-0.153004	0.0963014	-0.0223798	-0.0226492	-0.0467457	-0.0799538	-0.0740582	-0.16858	0.01474	-0.115954	-0.0344434	0.0484017	-0.0508519	-0.0497219	-0.0818512	0.00213039	0.474532	0.238401	0.16128	0.0422912	-0.273597
F9XAG6	16.0982	16.1286	14.4299	13.6494	16.4098	16.7173	14.4656	13.7068	16.3919	16.1827	14.4067	13.5682	16.533	16.4965	14.2112	13.7888	16.1456	15.9039	13.9582	13.985	17.7485	16.2344	14.2884	14.2191	0.102794	-0.398786	0.261438	-0.0450628	-0.0213857	0.0218436	0.0393663	-0.122451	-0.0557316	0.0690449	0.0410983	0.471371	-0.150021	0.238021	0.0503978	-0.00540205	-0.337546	-0.166468	-0.325249	0.133663	0.36506	-0.165982	-0.0949977	0.0949842	-0.0696702
F9XAG7	12.4249	13.1578	12.0551	12.5687	12.9367	13.3024	12.5688	12.5772	12.9488	12.5131	12.3395	12.2732	13.4495	13.0982	12.2352	12.7004	13.2727	12.7745	12.515	12.7002	13.9985	12.9619	12.3799	12.7688	-0.187911	-0.0603272	-0.168911	0.0957242	-0.111794	-0.0838766	0.0870131	-0.0305909	-0.12922	-0.0537737	-0.0193387	0.111028	0.14914	0.149026	0.0188325	0.127637	0.172224	0.0133987	0.175948	0.0703319	-0.00232059	-0.129249	-0.0591087	-0.133883	0.000783883
F9XAG9	14.7257	14.008	13.7234	12.65	15.1525	14.4714	14.015	12.8762	15.0041	13.8367	13.8809	12.57	15.3268	14.348	13.9564	12.7205	15.0578	13.9135	13.9179	12.9164	15.9738	14.3014	14.0207	13.3045	0.0780255	-0.388648	-0.0707086	-0.0645233	0.0690501	-0.093363	-0.0369515	0.0268378	-0.0739952	-0.0824996	0.00104193	0.256191	-0.00854288	0.220289	0.16984	-0.0937655	-0.0776109	-0.0261818	0.00876168	0.0451057	-0.0619637	0.0317122	0.0115582	0.160341	-0.146875
F9XAJ6	12.0919	12.6029	14.2605	12.4938	12.2716	12.7524	14.2341	12.4369	12.194	12.3071	14.2965	12.4199	12.8248	12.6952	14.233	12.6945	12.3487	12.3499	14.5885	12.9431	13.0069	12.9001	14.413	13.0812	0.194696	-0.248554	0.0477908	-0.0593598	-0.061404	-0.267117	-0.236394	-0.251086	-0.0626748	-0.0854678	-0.0586247	0.271789	0.239975	0.112708	0.0279528	0.0416041	-0.0362395	-0.0444639	0.260778	0.23311	-0.278403	0.175638	-0.0146605	0.0984074	-0.0116022
F9XAL1	8.36212	10.6304	10.2939	11.1378	8.50894	10.7693	10.5736	10.908	8.57815	8.71651	10.1883	10.4758	8.9116	9.65215	9.95482	10.6811	8.72325	8.54516	10.2875	11.108	10.2221	10.029	10.4384	11.5278	0.0368339	0.656442	0.12942	0.289795	-0.252061	0.627345	0.151267	-0.0747861	-0.301623	-0.145435	-0.102516	-0.441316	-0.101293	-0.0528098	-0.202069	-0.266693	-0.0897116	-0.971752	0.00795678	0.103179	0.508748	0.182092	0.0588605	0.250128	0.0281655
F9XAL2	9.93143	13.2676	11.3675	8.48091	11.4275	13.7241	11.4969	9.61631	11.0537	12.3579	11.5203	9.53148	11.3174	13.1692	11.4996	9.17365	11.1749	12.8454	11.045	9.41699	13.3522	13.1196	11.7257	9.33365	-0.885667	-0.0631562	0.0499209	-0.65281	0.174652	0.2252	-0.0784743	0.34775	0.468264	0.0334063	-0.118821	-0.15678	-0.187296	0.107375	0.189613	-0.0598607	-0.129913	-0.028388	-0.387608	0.126408	1.14705	-0.0842511	0.193142	-0.229751	-0.644474
F9XAN5	13.4952	15.32	12.9629	13.55	13.863	15.5757	12.9555	13.6868	13.6774	14.5098	13.1208	13.6012	14.111	15.1171	12.951	13.6921	13.8832	14.8707	13.0022	13.7845	14.9352	15.2835	13.1815	13.9046	0.0601341	-0.0429808	0.0587706	-0.0280786	-0.0077908	0.0446711	-0.206341	-0.026114	0.093593	0.047466	-0.113084	-0.0370705	-0.0117334	0.0231413	0.0545423	0.0141761	-0.0395578	-0.035274	-0.0168685	0.0495708	0.112032	0.0475128	0.0624309	-0.103147	-0.0177458
F9XAN9	13.5659	13.2786	12.1946	13.7081	13.838	13.925	12.4319	13.7182	13.9176	12.7807	12.1116	13.8125	14.25	13.3298	12.0872	13.856	13.7899	12.9613	11.8369	13.85	15.2486	13.4358	12.2724	14.3051	0.0233294	-0.256764	0.163729	-0.0417589	-0.140302	0.221557	0.143244	-0.1665	0.133112	-0.0885496	0.0195766	0.0614543	0.019787	0.0633984	0.0640069	0.00637233	-0.240342	-0.117084	-0.308979	-0.056739	0.317952	0.0274386	0.0265483	0.125514	-0.152229
F9XAQ0	NaN	12.8689	11.506	12.4046	NaN	13.0912	11.622	12.2867	NaN	12.4737	11.7531	12.3283	NaN	12.8657	11.2239	12.2786	NaN	12.5281	11.4395	12.5711	7.15543	12.7588	11.5451	12.7144	NaN	-0.145694	0.115988	0.099108	NaN	-0.0914335	-0.0257898	-0.15361	0.0932581	0.193804	NaN	0.275265	NaN	0.1201	-0.158521	-0.126728	NaN	-0.0294852	-0.0655164	0.108777	NaN	-0.128752	-0.0599656	-0.0208052	0.0929749
F9XAQ4	12.1466	14.0826	13.419	12.5861	12.9534	14.5498	13.8711	12.7759	12.4698	13.7566	13.6313	12.3302	12.928	14.4049	13.7074	12.8957	12.8498	14.1832	13.7691	12.7174	13.1995	14.0817	13.6246	12.8699	-0.052211	-0.343999	-0.126472	0.015345	0.318916	-0.0449443	0.0678492	0.070271	-0.170017	-0.0834862	-0.0843108	0.145998	0.0415748	0.247255	0.169468	0.225092	0.163359	0.213607	0.10859	-0.0101855	-0.387328	-0.217917	-0.135949	-0.130505	0.0910904
F9XAQ5	16.4562	17.4251	16.8249	17.7266	16.9085	17.4822	17.0427	17.87	16.8416	16.5326	16.9007	17.7767	17.2422	16.9482	16.7216	17.8188	17.0568	16.9541	16.8517	17.9261	18.1787	17.2729	17.0737	18.1839	-0.0987271	0.0724463	0.0472477	-0.0319696	-0.0821221	-0.038577	0.00729629	-0.0234466	0.088673	-0.0462484	-0.0687484	-0.00404471	-0.000357971	-0.13552	-0.0484094	-0.0395825	0.0142351	0.0584464	-0.0409255	0.0106427	0.235721	0.0472487	0.0810393	-0.00431696	-0.0926736
F9XAQ8	17.271	18.111	17.2229	17.8786	17.6042	18.0646	17.481	18.0242	17.4652	17.0937	17.4702	17.7883	17.844	17.6748	17.3353	17.986	17.7432	17.4776	17.5556	18.0061	18.3265	17.8968	17.502	18.2007	0.121092	0.141037	-0.0800398	0.0230663	0.0185678	-0.0733909	-0.0796928	0.0338209	0.00321741	-0.00194897	-0.0401563	-0.0600988	0.00641598	-0.0261551	0.0399422	0.0307026	0.105594	-0.0352931	0.13768	-0.006278	-0.211514	0.0539005	-0.0159405	-0.0845292	0.11581
F9XAR5	14.8815	16.4465	15.5588	16.892	15.3496	16.1968	15.8541	16.9211	15.3694	15.0203	15.6859	16.5764	15.583	15.5841	15.6632	16.8212	15.4349	15.6431	15.8646	16.8422	16.383	16.0889	15.9491	17.0744	-0.059667	0.366361	-0.0789191	0.162578	-0.0272558	-0.0514343	-0.0413597	0.0568623	-0.0825268	-0.121093	0.0728527	-0.243734	-0.0458077	-0.227007	0.0331179	-0.00808267	0.00604829	0.0199925	0.111861	-0.044123	0.0538296	0.135822	0.096393	-0.0847079	0.0472541
F9XAR6	14.1355	16.2691	15.5012	15.6215	14.7115	15.8122	15.7569	15.641	14.5506	14.5739	15.4485	15.2809	14.9065	15.0367	15.3116	15.5798	14.8043	15.2627	15.8062	15.5884	15.4651	15.7519	15.97	15.7734	-0.0677079	0.567891	-0.00632383	0.165809	0.0726106	-0.057157	-0.00836193	0.0503837	-0.104307	-0.22827	-0.00798602	-0.311221	0.0157296	-0.395603	-0.188246	0.024238	0.113479	0.0184355	0.1837	-0.0241648	-0.126125	0.177655	0.247502	-0.111958	0.118149
F9XAR7	14.6226	16.1915	15.1256	16.3522	15.2497	15.9822	15.3921	16.4514	15.1835	14.6241	15.3424	16.288	15.3327	15.09	15.0034	16.385	15.125	15.1347	15.1682	16.3582	16.482	15.8053	15.4502	16.8349	-0.150895	0.470036	0.00350235	0.03237	0.0405066	0.0926409	0.0123028	-0.00326591	0.0386251	0.0510489	0.0546251	-0.281305	-0.128461	-0.362456	-0.111066	-0.0346358	-0.136226	-0.129733	-0.0689229	-0.118484	0.320449	0.210816	0.113135	0.0853904	-0.0936943
F9XAS0	12.8867	13.8333	11.8366	13.0031	13.3364	13.7985	12.1817	13.2607	13.3464	12.8153	12.0749	12.921	13.7291	13.3596	11.8266	13.2321	13.5187	13.1859	12.0034	13.3859	14.3615	13.6928	12.2802	13.6404	-0.0840111	0.135542	-0.0724543	-0.11234	-0.0700697	-0.0673537	0.0149193	0.0104713	-0.12389	-0.00333847	0.0202817	-0.0663115	0.0707631	-0.0691701	-0.0747696	0.0169117	0.0602583	-0.0547933	-0.0205834	0.113586	0.00277776	0.122087	0.156226	0.0952614	-0.127404
F9XAS7	14.454	14.7417	14.2156	14.2513	14.8041	14.8597	14.7108	14.4509	14.6904	13.869	14.6367	14.0365	14.8326	14.5441	14.5367	14.2142	14.7286	14.2631	14.6063	14.0084	14.9541	14.621	14.5999	14.5053	0.269081	0.00845566	-0.21049	0.131941	0.183466	-0.0416279	0.0269337	0.19673	-0.0122965	0.0413736	0.150107	-0.0481703	-0.0398631	0.0797447	0.118254	-0.00494333	0.0560374	-0.0131459	0.0651777	-0.267749	-0.618828	0.0147436	-0.0412491	-0.0436819	0.222001
F9XAT2	13.2288	14.8251	14.0412	11.8097	13.3681	15.004	14.2467	11.7848	13.3325	14.0165	14.1384	11.8186	13.6008	14.6177	14.0609	11.9173	13.561	14.4042	14.0305	11.9651	14.4668	14.6983	14.1309	12.1824	0.194846	-0.0193886	0.0580401	0.0218159	-0.101564	-0.00857145	0.00570048	-0.137912	0.101217	-0.0141051	-0.0568625	-0.0118971	-0.120709	0.0422111	0.0853784	0.0296344	0.0394296	0.0167701	-0.0677098	0.0203694	0.044861	-0.019124	-0.0673041	-0.0351243	0.0830011
F9XAT6	14.8228	16.2541	15.4604	15.6805	15.0967	16.8219	15.6019	16.0266	15.1289	16.3156	15.6171	15.9648	15.6042	16.8428	15.6057	16.1868	15.4682	16.5491	15.6774	16.4766	16.2662	16.3786	15.3793	16.3491	-0.015982	-0.523105	0.0283406	-0.308427	-0.177797	-0.123338	-0.0879124	-0.097159	0.0463232	0.0157743	-0.065248	0.354508	0.0778152	0.334598	0.18122	0.0980279	0.141781	0.228929	0.130321	0.330809	0.039431	-0.271592	-0.267743	-0.069574	-0.062424
F9XAU5	11.2003	12.9597	12.216	7.40744	11.6617	13.2991	12.5657	8.04286	11.6751	12.1079	12.3194	8.26477	12.1514	13.0522	12.5131	7.83946	12.0106	12.9778	12.7747	9.52626	13.1271	12.7501	12.4834	8.5129	-0.211658	-0.14827	-0.137864	-0.733067	-0.185974	0.0230189	-0.045852	-0.232481	0.194773	-0.203697	-0.092246	-0.183972	0.0518433	0.213225	0.166933	-0.400841	0.110941	0.326823	0.30587	1.2289	0.327094	-0.230825	-0.0853893	-0.0572846	-0.296114
F9XAV0	16.4087	17.5435	17.3393	17.4864	16.9327	17.6833	17.7722	17.7165	16.9733	16.6978	17.7428	17.4537	17.3533	17.1917	17.5133	17.6012	17.0649	17.0115	17.6261	17.5028	17.9014	17.3902	17.7163	17.882	-0.137967	0.0403605	-0.154179	0.0044423	-0.0496422	0.012017	0.021026	0.0996181	0.0422106	0.0801064	0.0712945	0.010716	0.11903	-0.0424795	0.027479	0.0194563	0.0305464	-0.0346592	0.017686	-0.136011	-0.0332617	0.0140452	0.00788166	-0.0297165	-0.0515731
F9XAV8	13.3294	14.2036	15.0535	14.0914	13.7696	14.6657	14.9901	14.2884	13.5272	13.9403	14.9764	14.0672	13.9466	14.4993	14.529	14.1768	13.7922	14.0238	14.4682	14.3822	14.8936	14.3927	14.9484	14.6653	0.0120062	-0.334158	0.350808	-0.0620104	0.0165425	-0.0400918	0.029591	0.000148243	-0.0157572	0.10447	-0.145514	0.218668	-0.0583468	0.230574	-0.166071	-0.0764401	-0.012867	-0.0569742	-0.349465	0.0718476	0.188179	-0.0180173	0.0306678	0.0822118	-0.079099
F9XAW4	12.7753	13.6262	12.6131	13.5722	12.9354	13.4842	12.7397	13.6101	12.9367	12.596	12.7304	13.5511	13.4269	13.3361	12.8187	13.7676	13.0828	13.0606	13.0193	13.8608	13.932	13.3875	12.7761	14.0147	0.152876	0.12758	-0.0448923	-0.0320823	-0.122763	-0.182473	-0.176067	-0.129046	0.0173046	-0.0968493	-0.0411505	-0.086493	0.116843	0.106463	0.168313	0.0634637	-0.0273303	0.0190327	0.246365	0.099629	-0.0784746	0.0158906	-0.0968694	-0.0192688	0.0955507
F9XAW6	8.19219	10.4762	10.2615	7.92404	9.58594	10.8054	10.2306	NaN	10.1978	9.61285	10.2031	NaN	9.56982	9.88251	9.79539	NaN	10.3424	10.0174	10.2741	NaN	11.0172	10.521	10.3215	NaN	-1.06631	0.00684568	0.205373	NaN	-0.108279	0.167946	-0.0832873	NaN	NaN	-0.0222967	0.583955	-0.0404552	-0.376291	-0.317928	-0.253124	NaN	0.596231	0.00497757	0.102997	NaN	0.37069	0.178614	0.0503378	NaN	-0.484576
F9XAZ2	11.8478	12.2464	11.3164	13.528	12.5497	12.2953	11.3239	13.7001	11.8161	11.2706	11.2345	13.602	12.3633	11.9492	11.1255	13.4533	11.9274	11.6473	11.3909	13.6034	13.1883	12.1423	11.4749	13.8478	0.124731	0.0710258	0.130287	0.0306442	0.390914	-0.0481009	-0.119983	0.0679539	0.175188	-0.120916	-0.262264	-0.0886533	-0.0473544	0.042838	-0.0529455	-0.143842	-0.283301	-0.0710439	0.0897998	-0.050785	0.0772739	0.0939344	0.0737585	-0.0791591	0.0477199
F9XAZ4	NaN	8.98976	8.44004	9.00377	NaN	9.36569	7.31406	9.3085	NaN	7.28836	8.47715	8.33856	NaN	8.23021	8.75482	8.27924	NaN	8.38016	9.12376	9.77213	NaN	9.62317	8.6405	9.42616	NaN	0.0933764	0.106557	0.107488	NaN	0.30122	-1.27719	0.277376	-0.487219	-0.0255966	NaN	-0.791939	NaN	-0.397214	0.428959	-0.716835	NaN	-0.0592219	0.675264	0.718991	NaN	0.853779	0.0920113	0.100199	-0.246189
F9XB03	NaN	12.422	10.5288	12.4977	6.23863	13.028	10.6792	12.713	NaN	11.2273	10.9019	12.2497	NaN	11.7898	10.773	12.5254	NaN	12.0592	11.3425	12.906	6.2832	12.4051	10.9528	13.1484	NaN	0.0165441	-0.209288	-0.050548	NaN	0.454546	-0.316691	0.0299069	-0.228063	-0.00547533	NaN	-0.362012	NaN	-0.346636	0.0424612	-0.122619	NaN	0.110834	0.489317	0.200911	NaN	0.126723	-0.00032375	0.170412	-0.180034
F9XB08	13.1253	15.0575	14.7711	12.9748	13.4727	15.0001	14.8785	12.9708	13.3246	13.8581	14.8545	12.7927	13.9208	14.4077	14.6969	12.6897	13.8197	14.2673	14.8239	13.0052	14.7467	14.8178	15.0004	13.2679	-0.0506309	0.23924	0.0584683	0.149692	-0.138911	0.013806	-0.0919052	0.0109407	0.0381518	-0.0273984	-0.206657	-0.144077	0.0573265	-0.141617	-0.00818083	-0.235184	0.15612	-0.0939386	-0.00375927	0.023229	0.182752	0.126586	0.0727754	0.0131712	0.000370948
F9XB28	13.763	15.2433	13.7351	15.0886	14.379	15.4817	14.2783	15.4454	14.301	14.8725	14.3618	15.4016	14.5536	15.4751	14.2188	15.4836	14.4926	15.3664	14.2861	15.6178	14.9596	15.4888	14.3066	16.008	-0.0860773	-0.328186	-0.337759	-0.293807	0.0942384	-0.257817	-0.0523622	-0.0718567	0.0897643	0.119649	0.096537	0.117149	0.0169372	0.17259	0.153518	0.00141625	0.155845	0.251925	0.0982189	0.078537	-0.27748	0.0443393	0.0187343	0.195946	-0.256842
F9XB30	11.5391	13.9036	10.4129	14.3053	12.3605	13.286	10.8187	14.471	12.2	12.0094	10.8607	14.0912	12.2242	12.4801	10.4475	14.3502	12.0081	12.937	11.3905	14.2943	12.3811	13.3967	11.0109	14.6927	-0.0206589	0.651287	-0.285747	0.0629404	0.365057	-0.134372	-0.137667	0.0938633	-0.0806439	-0.00720165	0.284864	-0.426781	-0.0232257	-0.503294	-0.243518	0.00811962	-0.0393676	0.141737	0.576897	-0.104934	-0.566669	0.271423	0.0972379	0.0206544	0.146294
F9XB48	7.61176	11.3582	8.7732	12.5556	NaN	11.1353	10.098	12.8669	6.80671	10.2518	9.4301	12.5838	8.58188	10.4578	8.97292	12.8478	7.92226	10.1733	9.76414	12.9111	8.31488	10.9293	9.74969	12.9037	NaN	0.390394	-0.566569	-0.097467	NaN	-0.000584424	0.500483	0.0790152	0.00123155	-0.0789431	NaN	0.100163	NaN	-0.241011	-0.359232	0.0950105	NaN	-0.337454	0.309354	0.101233	NaN	0.0884924	0.194906	-0.179023	-0.126006
F9XB53	14.7308	16.2638	15.1371	16.3122	15.3126	15.8497	15.7532	16.5459	15.241	14.4817	15.527	16.1459	15.8762	15.0645	15.3031	16.5119	15.5409	15.1673	15.8666	16.4649	16.9762	15.7363	16.0241	16.7001	-0.323115	0.586413	-0.33986	-0.00949247	-0.176988	0.00425228	0.0184583	0.0893702	-0.105282	-0.119209	-0.168265	-0.379564	0.134716	-0.343938	-0.166209	0.0903813	-0.000635691	-0.0531212	0.274634	-0.0136655	0.534288	0.185958	0.332186	-0.0513112	-0.271794
F9XB74	11.9871	11.7408	8.07751	NaN	12.2011	12.2021	8.23463	NaN	12.1671	10.6951	8.56354	NaN	12.9845	12.0693	6.28934	NaN	12.767	11.4761	7.1128	NaN	13.6578	11.7447	8.37304	NaN	-0.0812965	-0.164094	0.427274	NaN	-0.302984	0.129167	0.326615	NaN	NaN	0.744038	-0.256619	-0.393701	0.228497	0.433466	-1.35328	NaN	0.211021	0.0283013	-0.652445	NaN	0.201381	-0.0331389	0.507798	NaN	-0.164719
F9XBA2	12.2866	13.5418	12.8301	13.2303	13.1217	13.723	12.8489	13.528	12.8633	12.895	12.7253	13.3112	13.264	13.3066	12.6458	13.3059	13.0054	12.8911	12.8135	13.3997	13.9732	13.6267	13.0014	13.7273	-0.240064	-0.0390465	0.144158	-0.0616397	0.159358	-0.0259301	-0.0948189	0.101181	0.0897417	-0.129906	-0.0187114	0.130171	0.0497869	-0.00527694	-0.0324854	-0.085817	-0.00893091	-0.232782	0.0126056	-0.0491253	0.0585609	0.172864	0.100447	0.0056591	-0.133531
F9XBA9	11.4679	12.5588	NaN	11.692	11.6493	12.4706	NaN	11.8089	11.6327	11.5786	NaN	11.3511	11.8969	12.1454	NaN	11.9634	11.7199	11.7697	NaN	11.6181	12.768	12.2722	NaN	11.8181	0.171141	0.176055	NaN	0.108528	-0.0830913	-0.0802253	NaN	0.0905671	-0.161867	NaN	-0.0193723	0.01195	-0.0874278	0.031683	NaN	0.280097	-0.064451	-0.155981	NaN	-0.122272	0.083201	0.0165181	NaN	-0.195053	0.183686
F9XBB4	11.3129	12.2949	11.1764	12.6368	11.9522	12.4372	11.237	12.8235	11.9182	11.7772	11.3903	12.4141	12.2348	12.3235	11.523	12.7629	11.9701	12.1361	11.7599	12.6782	12.4688	12.4188	11.5558	12.847	-0.104179	-0.186558	-0.139082	0.0681832	0.0993577	-0.212365	-0.336308	0.120002	-0.0840881	-0.0944393	0.145735	0.111866	0.130119	0.111001	0.215139	0.0944858	0.0653457	0.111695	0.329412	-0.0472779	-0.336379	0.0643616	0.0252781	-0.151305	0.00910206
F9XBB7	11.3963	9.68666	NaN	9.67073	11.7339	9.31436	NaN	10.2788	11.6997	6.46544	NaN	9.99152	12.1582	9.11119	NaN	10.1241	11.9682	8.72823	NaN	10.1533	13.006	8.47667	NaN	10.384	-0.038319	0.806074	NaN	-0.304579	-0.136471	0.265691	NaN	0.168653	0.0867221	NaN	-0.0903306	-1.59906	0.0359022	0.499565	NaN	0.0490246	0.0459014	0.304649	NaN	0.0211344	0.183317	-0.276921	NaN	-0.0209554	0.192579
F9XBC9	NaN	10.7309	8.13473	10.5167	NaN	10.4907	9.32591	10.9934	NaN	7.17493	8.2466	10.2306	NaN	9.75931	7.70363	10.8309	NaN	9.92032	9.48398	11.0322	NaN	10.4546	8.17727	10.8009	NaN	0.725615	-0.252379	-0.0923278	NaN	0.317288	0.681025	0.249583	-0.307885	-0.309781	NaN	-2.01427	NaN	0.0229868	-0.675867	0.122108	NaN	0.37205	0.98185	0.266313	NaN	0.576325	-0.424848	-0.237791	0.155741
F9XBD5	11.7545	13.0596	8.60696	11.985	12.0657	12.8083	10.3489	11.626	12.1863	11.8054	10.2131	11.4151	12.4476	12.3835	10.0428	11.7971	12.2399	12.1766	10.3746	11.4584	12.8351	12.7097	10.3431	12.2207	0.05871	0.318892	-1.25637	0.359701	-0.065802	-0.10047	0.22784	-0.134062	-0.139689	0.180504	0.135153	-0.119178	0.0641885	-0.0881862	0.187039	0.0720524	0.0564474	-0.107074	0.396257	-0.323754	-0.248697	0.0960164	0.264735	0.165751	-0.199219
F9XBE6	NaN	11.8018	12.9778	13.103	NaN	11.9976	13.4303	13.153	NaN	10.8239	13.1501	12.9601	NaN	11.4998	12.9856	13.232	NaN	11.718	13.4587	13.2192	NaN	12.0198	13.4405	13.5056	NaN	-0.0918542	-0.137819	0.0326358	NaN	-0.0640874	0.0569648	-0.052183	-0.0397386	-0.134736	NaN	-0.25363	NaN	-0.124887	-0.12237	0.0618366	NaN	0.28134	0.228067	-0.00806296	NaN	0.253119	0.109893	0.00551224	-0.188521
F9XBE7	12.6025	14.6833	12.8588	14.4209	13.203	14.7031	13.0626	13.6794	12.9735	13.668	12.7652	13.6513	13.3935	14.0816	12.8026	13.9206	13.2906	13.9281	12.9781	13.8362	14.2475	14.3607	13.0073	13.8853	-0.123552	0.195649	0.0712396	0.647093	0.0412591	0.0474455	0.0173235	-0.229324	-0.0520728	-0.191559	-0.107931	-0.00353241	-0.0201033	-0.137092	0.0226988	0.0469866	0.0768996	-0.102557	0.0755327	-0.0944652	0.133427	8.77231e-05	0.00476474	-0.318218	0.242592
F9XBJ6	15.9269	15.4538	15.5557	15.3145	16.2227	15.3957	15.4869	15.2645	16.1045	14.508	15.3239	15.3265	16.2807	15.1346	15.1748	15.2816	16.1045	14.643	15.1329	15.4883	17.1215	15.3105	15.4107	15.7597	0.192514	0.129404	0.333155	0.0337538	0.0526114	-0.0968257	0.00651826	-0.151082	0.116248	-0.0679749	0.0146717	-0.000314057	-0.141318	0.0791418	-0.0401838	-0.0989097	-0.117547	-0.224429	-0.204686	0.0506942	-0.000931561	0.113022	-0.0268287	0.0492958	0.138567
F9XBK9	12.3884	11.7122	13.4508	10.6418	12.4204	11.5802	13.8176	10.6734	12.3077	11.1838	13.5956	10.8604	12.9293	11.5176	13.5381	10.8041	12.9005	11.6759	13.8122	10.8698	13.059	11.833	13.7169	10.9596	0.279897	-0.121718	-0.0794667	-0.034624	-0.123783	-0.421814	0.0295172	-0.137847	0.25449	-0.10395	-0.156133	0.165905	0.133226	-0.0474114	0.0153965	0.0279344	0.304371	0.298976	0.166873	0.0365623	-0.437578	0.126062	-0.0283697	-0.146516	0.132622
F9XBL3	11.4629	13.0053	11.3264	13.137	12.0321	13.0436	11.6812	13.1987	11.8411	12.4054	11.8033	12.8352	11.7855	12.8695	11.8009	13.1671	11.6997	12.7845	11.4282	13.2776	12.0599	13.133	11.6903	13.512	0.208403	-0.118388	-0.170429	0.0741408	0.341905	-0.24817	-0.073382	0.00101783	-0.157071	0.137216	0.23122	0.0977292	-0.156532	0.0147439	0.311718	0.00446371	-0.0423877	0.117805	-0.183664	0.0579448	-0.582609	0.136281	-0.0214591	0.0195038	0.110503
F9XBL6	15.232	15.9623	15.0162	15.8754	15.6388	16.4427	15.1485	16.0297	15.5827	15.8104	15.1065	15.8437	15.9597	16.2022	14.9508	16.0187	15.7233	15.6914	14.8751	16.2329	16.5952	16.009	15.1002	16.3961	0.00248271	-0.307514	0.108183	-0.0655525	-0.0264502	0.00478968	-0.0172699	-0.0461299	-0.0267837	0.029284	-0.00226858	0.356665	0.0425346	0.201354	0.0504776	-0.022057	0.00607372	-0.121422	-0.147908	0.135047	-0.0223722	-0.133872	-0.0227667	0.0254766	-0.0272167
F9XBN0	12.3745	13.8755	12.0693	8.61091	13.206	13.8195	12.333	7.70563	13.0078	12.9429	12.1747	7.79935	13.3592	13.3295	11.9998	8.42568	13.2893	13.5321	12.4114	8.21004	13.7527	13.6193	12.4959	8.95344	-0.231346	0.105501	-0.0531381	0.45185	0.164461	-0.118561	-0.0471854	-0.588271	-0.289212	-0.116981	0.046544	-0.0109537	0.0657487	-0.171483	-0.115081	0.166821	0.195778	0.219158	0.173964	-0.105885	-0.241185	-0.0236605	0.158421	0.364697	0.00364849
F9XBQ7	13.7651	14.1271	14.3222	14.0808	14.3283	14.5011	14.338	14.1469	14.0427	13.7544	14.4409	13.9333	14.4187	14.2693	14.1173	13.9548	14.1916	13.6951	13.9652	14.0143	15.3018	14.1085	14.2022	14.4491	-0.0172029	-0.198968	0.216141	0.109379	0.110253	0.00693372	-0.0258037	0.0406098	0.03239	0.165599	-0.0949722	0.244379	-0.0511818	0.212158	0.0188687	-0.116397	-0.0783597	-0.173949	-0.25593	-0.114014	0.131463	-0.0905539	-0.118875	0.0480321	0.0348205
F9XBR3	16.1874	17.3353	16.2567	17.4534	16.6372	17.4419	16.4675	17.5017	16.6068	16.2156	16.3845	17.2772	17.0056	16.8033	16.1983	17.4414	16.7229	16.5674	16.3166	17.4894	18.0417	17.0892	16.5276	17.836	-0.120455	0.176297	0.0230762	0.0786556	-0.106385	0.114888	-0.0238752	-0.0078836	-0.0270067	-0.018397	-0.0564508	-0.127256	0.0100876	-0.0866441	-0.0276991	-0.0331633	-0.0726208	-0.134511	-0.0320427	-0.0421613	0.345823	0.0572257	0.0789377	0.0315593	-0.0889929
F9XBS1	17.3997	18.5713	18.193	18.3127	17.9992	18.7731	18.1726	18.3884	17.8855	17.5837	18.1424	18.2648	17.9983	18.1061	17.915	18.3165	17.7942	17.8599	17.9765	18.4	19.1843	18.4793	18.2209	18.8385	-0.0847338	0.092241	0.214496	0.0176605	0.0789545	0.125934	-0.0636911	-0.0414796	0.040233	-0.00537933	0.0456858	-0.0793141	-0.173819	-0.103997	-0.055882	-0.0782798	-0.177918	-0.162117	-0.116975	-0.0519402	0.31183	0.127253	0.0274317	0.113806	-0.0851643
F9XBS3	11.3618	13.2038	11.0352	12.6443	11.9437	13.1795	10.9965	12.7123	11.6157	12.057	10.9941	12.6087	11.6972	12.245	10.9253	12.398	11.1706	12.7256	10.5984	12.6913	12.7694	13.0216	11.1882	13.1964	0.161177	0.214909	0.203818	0.0608854	0.307274	0.0225411	-0.092695	-0.00594717	0.0957993	-0.00651786	0.0596422	-0.115813	-0.191082	-0.474964	0.101558	-0.285172	-0.517721	0.193673	-0.347982	-0.0489281	0.18071	0.159654	0.141819	0.183363	-0.00618939
F9XBS4	14.962	15.9599	15.7892	16.2948	15.4805	16.4768	15.8211	16.3879	15.3664	15.6298	15.5683	16.3624	15.5666	16.0896	15.4815	16.3621	15.0849	15.5838	15.3573	16.4761	16.5387	15.9626	15.5948	16.783	0.021213	-0.240655	0.312073	-0.0244308	0.104039	0.10813	0.0861478	-0.0662065	0.113611	-0.0781118	0.0702347	0.245278	-0.0617991	0.157949	0.0120067	-0.0569938	-0.343606	-0.159713	-0.234832	-5.84498e-05	0.209918	-0.110989	-0.0972846	0.0340789	0.00811929
F9XBT3	8.9305	13.1312	9.81761	NaN	10.3759	13.2155	9.83154	NaN	9.50617	12.0965	9.21517	NaN	10.4681	12.7339	9.90665	NaN	10.3735	12.4515	9.5647	NaN	11.4908	12.9001	8.67818	NaN	-0.701264	0.126253	0.440205	NaN	0.308424	0.0424449	0.196368	NaN	NaN	-0.331499	-0.480973	-0.0923219	0.14874	-0.00205225	0.536869	NaN	0.254075	-0.0964344	0.0722864	NaN	0.470999	0.0221104	-0.914229	NaN	0.0954379
F9XBT4	11.441	11.8517	9.18696	11.668	11.7807	12.0864	8.15279	11.5238	11.5216	11.0384	9.20748	11.3766	11.8895	11.7118	6.89093	11.5671	11.9094	11.5268	8.27743	11.4107	12.6669	11.8811	8.72165	11.7408	0.131879	-0.0811454	0.905657	0.245301	0.0358495	-0.0145688	-0.386282	-0.0337749	0.0243772	0.756914	-0.14287	-0.0783965	-0.107237	0.047901	-1.38275	0.0445668	0.112597	0.050992	-0.118886	-0.168885	-0.030219	0.0752175	0.225342	-0.111585	0.260734
F9XBT7	11.9724	12.0156	8.04854	10.2426	12.6267	12.5686	6.1079	10.0374	12.3385	11.7174	7.02403	10.3796	12.5761	12.1614	8.47869	10.637	12.5494	11.8862	6.66007	10.671	13.3487	12.2147	7.38137	11.0528	-0.0371819	-0.328591	0.890015	-0.135703	0.181384	0.056417	-1.3084	-0.475711	0.071819	-0.30376	-0.0264226	0.189363	-0.121067	0.0862616	1.32778	0.158914	0.0521836	-0.000985131	-0.613473	0.13587	-0.0488961	-0.00246494	0.00783883	0.244812	0.0468122
F9XBV7	14.5149	16.158	15.4931	16.6484	15.1066	16.1581	15.8492	16.7185	15.1752	14.7926	15.7818	16.5081	15.4824	15.4678	15.5957	16.7273	15.4189	15.4408	15.8988	16.7439	16.7196	16.0779	16.0212	17.1464	-0.328984	0.225278	-0.15528	0.024699	-0.172958	0.0572764	-0.05695	-0.0399649	-0.0450175	-0.0358306	-0.0240224	-0.323973	-0.0490634	-0.195943	-0.0450707	0.00388531	0.0873463	-0.0348566	0.135368	-0.0366544	0.487682	0.272218	0.157764	0.0930526	-0.311251
F9XBW4	16.1643	15.6916	14.1816	16.1618	16.4679	16.4086	14.1257	16.3836	16.4232	15.7117	14.105	16.2868	16.7225	16.0886	13.8724	16.3724	16.3092	15.5563	13.7546	16.5633	17.4998	15.819	14.0771	16.8861	0.125532	-0.437821	0.287112	-0.155447	-0.00657741	0.111042	-0.0265439	-0.0684292	0.0400531	0.0412369	0.0290703	0.398301	-0.00383665	0.228108	-0.0144996	-0.0446291	-0.217198	-0.116152	-0.254944	0.0892621	0.0730106	-0.183477	-0.0323612	0.13919	-0.0442469
F9XBW7	12.8133	14.8639	13.0485	13.4411	13.2456	14.8519	13.3643	13.7268	13.2257	13.8434	13.3472	13.3676	13.6975	14.3588	13.2489	13.772	13.7641	14.3195	13.2876	13.9135	14.5006	14.8208	13.7051	14.2197	-0.168805	0.104054	-0.16015	-0.173858	-0.172172	-0.0760762	-0.102192	-0.0230758	-0.17693	-0.0307477	-0.111752	-0.10037	0.027836	-0.13214	0.047838	0.0572267	0.294403	0.0166482	-0.036148	0.141605	0.130491	0.187884	0.281399	0.175033	-0.293392
F9XBW8	13.9109	13.6824	12.2743	13.9407	14.3052	13.9715	12.1895	14.1264	14.1453	13.0407	12.2191	13.809	14.5925	13.683	12.1282	14.0549	14.3975	13.409	11.9065	14.0102	15.5637	13.7046	12.2563	14.4401	-0.0158592	-0.149567	0.236895	0.00225092	-0.0572957	-0.028641	-0.105717	0.0531133	-0.0589598	0.0124161	-0.136864	0.0247426	-0.0218773	0.119943	0.0984433	0.0167222	-0.016986	0.0339863	-0.245933	-0.0851092	0.248883	-0.000463977	0.00389578	0.0719826	-0.0626443
F9XBX8	NaN	11.2821	10.0473	11.9169	NaN	11.5897	10.6501	12.0393	NaN	10.0056	9.88602	11.641	NaN	11.0747	10.072	12.028	NaN	10.7117	10.6895	12.3663	NaN	11.3008	10.1532	12.2194	NaN	0.0378371	-0.0774977	0.00687815	NaN	0.177396	0.267532	-0.00555489	-0.198572	-0.408007	NaN	-0.422553	NaN	0.099371	-0.0451392	0.0181718	NaN	-0.0755928	0.449703	0.29939	NaN	0.183541	-0.186591	-0.120313	0.0301938
F9XBY0	10.7837	9.00826	NaN	9.53778	11.4784	8.4939	NaN	9.81481	11.0697	7.6094	NaN	9.30581	11.5455	8.35606	NaN	9.34529	11.5531	8.02702	NaN	9.19584	12.199	7.57645	NaN	9.94538	-0.0954825	0.579585	NaN	0.138739	0.16351	-0.102862	NaN	0.280925	-0.022726	NaN	-0.164861	-0.00318617	-0.0212013	0.196342	NaN	-0.15354	0.18624	0.0553525	NaN	-0.360061	-0.0682058	-0.725232	NaN	0.116664	0.433205
F9XBY7	11.6379	13.098	13.5113	12.5067	12.1224	13.2701	13.8134	12.5498	12.2199	12.6108	13.6773	12.8327	12.1018	13.0893	13.6449	12.356	12.1349	12.7233	13.3886	12.7258	12.7168	12.9641	13.5461	12.5954	0.0413524	-0.111439	0.0392656	0.0373924	0.0901163	-0.1074	0.0836133	-0.0543177	0.433911	0.0360214	0.267947	0.217445	-0.182338	0.148824	0.180497	-0.213039	0.0507227	-0.0291118	-0.19845	0.0996685	-0.2678	-0.118317	-0.140947	-0.303615	0.209313
F9XBZ0	12.7214	13.0081	13.0513	12.9982	12.8542	13.2575	13.0489	13.146	12.9113	12.3635	12.9176	12.9463	13.078	12.923	12.7016	13.022	13.0616	12.4771	12.7738	13.3099	13.7135	13.0385	13.0551	13.5216	0.223767	-0.0866861	0.251471	-0.0340251	-0.0790625	-0.00537235	-0.00865105	-0.0210704	-0.0154361	-0.0514946	0.0583336	0.0848126	-0.107197	0.0971718	-0.090598	-0.10998	0.0762909	-0.160649	-0.140979	0.120817	-0.172131	0.070723	0.0402516	0.0596952	0.0889971
F9XBZ2	8.56522	13.4804	10.8368	13.5365	8.56834	13.3343	11.5256	13.7215	7.5944	11.777	11.2649	13.4476	9.09231	12.6019	10.5415	13.5908	9.14022	12.4992	11.5389	13.59	10.0222	12.9459	11.5345	13.7944	0.293835	0.457134	-0.24529	0.0481247	-0.138764	0.142914	0.185665	0.0983214	0.0297397	0.013516	-1.03236	-0.430179	0.133318	-0.152453	-0.533026	0.00266429	0.381158	-0.067073	0.341724	-0.0552218	0.362811	0.049657	0.237411	-0.123628	0.00688813
F9XBZ4	15.3475	15.934	15.1558	15.2589	15.7594	16.1306	15.4365	15.3762	15.7014	15.1785	15.3348	15.0548	15.9307	15.5783	15.0381	15.3372	15.7949	15.2875	15.1359	15.3779	16.6496	15.8769	15.398	15.7165	0.0426561	0.0195588	0.0308156	0.0304287	0.0188396	0.0480714	0.0538238	0.0128858	-0.103146	0.0405461	0.0411768	0.0801214	-0.0617803	-0.0671731	-0.0791838	0.00897888	0.00238475	-0.169975	-0.104054	-0.007472	-0.0432769	0.0893968	0.0580526	0.0583245	-0.00975946
F9XBZ5	11.8722	8.67257	8.59332	11.4357	12.3081	9.7627	9.07433	11.6235	12.3483	7.3869	9.24086	11.4242	12.3508	8.71184	9.35603	11.2599	11.7947	9.52074	9.90394	11.5818	13.5286	9.29418	8.54558	11.7353	0.0641686	-0.469082	-0.400788	0.0507591	0.0643475	0.452967	-0.177551	0.103714	0.109709	0.0774927	0.184837	-0.938663	-0.144825	-0.160849	0.369549	-0.224834	-0.501022	0.836095	0.794824	0.0399914	0.332494	0.279532	-0.663527	-0.0793393	-0.156026
F9XBZ7	13.0963	12.7931	12.6359	11.9423	13.4941	13.0201	12.3944	11.9599	13.1598	11.8034	12.5242	11.5309	13.3803	12.6793	12.1701	11.7861	13.2822	12.1875	12.4631	11.8928	14.2257	12.8046	12.7371	12.5065	0.215664	-0.00505553	0.273313	0.131004	0.177714	0.0538621	-0.225926	0.0137281	-0.20989	-0.00762921	-0.0762723	-0.178697	-0.187957	0.150158	-0.184823	-0.125016	-0.0861738	-0.153668	-0.0144848	-0.0753401	-0.0429749	0.133401	0.15955	0.265513	0.0248589
F9XBZ9	13.2483	15.1404	13.6485	13.4477	13.588	15.2534	13.9612	13.5977	13.3622	14.3816	13.956	13.3939	13.8052	14.7322	13.8005	13.5121	13.6818	14.9171	13.8646	13.69	14.089	15.1636	13.9131	13.8391	0.178294	-0.0411448	-0.0839248	-0.00725833	0.0822589	-0.0962494	-0.0289904	0.0078765	0.00944524	0.0543525	-0.0631923	0.0161648	0.0475966	-0.180407	0.0757206	-0.0426556	0.124076	0.192564	0.0171653	0.0781521	-0.369034	0.109073	-0.0343232	-0.0455599	0.0964527
F9XC08	10.2444	10.3929	NaN	12.34	10.8514	9.81642	NaN	12.5451	10.716	9.30415	NaN	12.6355	10.7605	10.1232	6.42462	12.848	10.7166	10.2836	7.33154	12.863	11.7074	10.7832	NaN	12.9039	-0.0292674	0.0254525	NaN	-0.224123	0.142008	-0.719059	NaN	-0.153918	0.141903	NaN	0.086955	-0.247166	-0.20077	0.0247764	NaN	0.184085	-0.0446602	0.373157	NaN	0.142007	0.0457341	0.54284	NaN	-0.0899552	-0.242186
F9XC11	16.014	17.0355	15.7239	16.5791	16.3869	17.0078	15.9856	16.7912	16.3615	16.0186	15.8134	16.5495	16.5767	16.5776	15.7339	16.7499	16.3548	16.376	15.9468	16.7244	17.372	16.8101	16.0061	17.0204	0.0620859	0.147749	-0.0194644	-0.0315335	-0.000774935	-0.04809	-0.0155467	0.0457075	0.00936289	-0.0992266	0.0541751	-0.0530569	-0.0628154	-0.0412136	-0.00188214	0.0394612	-0.0847537	-0.0547499	0.0884092	-0.0430936	0.0320831	0.0493611	0.0477106	-0.0199044	0.0123968
F9XC12	10.4141	10.8856	11.0823	11.9731	10.1925	11.4526	10.2073	12.5318	10.4135	10.7333	10.5144	12.176	10.943	11.2927	10.1237	12.4224	10.9065	10.7465	10.2936	12.423	11.5146	11.3854	10.8794	12.6471	0.242421	-0.447236	0.690416	-0.264009	-0.414809	-0.0483359	-0.442382	0.1598	0.00942187	-0.0467127	-0.113484	0.216503	0.0837153	0.22883	-0.260512	0.0854825	0.247208	-0.129335	-0.213292	0.0289935	-0.0450515	0.179573	0.272483	-0.0196891	-0.0414305
[truncated: 508 more rows]
[truncated: 18 more columns]

## Sheet: NMTi treated-whole proteome
Gene names	Saccharomyces cerevisiae protein UniProt ID	126 - DMSO/YnMyr			127 - 8 µM IMP-1088/YnMyr			128 - 16 µM IMP-1088/YnMyr			129 - 32 µM IMP-1088/YnMyr			130 - 64 µM IMP-1088/YnMyr			131 - 30 µM Myr/YnMyr			Normalized 126 - DMSO/YnMyr			Normalized 127 - 8 µM IMP-1088/YnMyr			Normalized 128 - 16 µM IMP-1088/YnMyr			Normalized 129 - 32 µM IMP-1088/YnMyr			Normalized 130 - 64 µM IMP-1088/YnMyr			Normalized 131 - 30 µM Myr/YnMyr			Average log2 difference (DMSO vs 64 µM IMP-1088)	t-test -logP (DMSO vs 64 µM IMP-1088)	t-test significant S0=0.1 (DMSO vs 64 µM IMP-1088)	-log ANOVA p-value	ANOVA q-value	ANOVA Significant	Predicted myristoylated (Myristoylator	Peptides	Razor + unique peptides	Unique peptides	Sequence coverage [%]	Mol. weight [kDa]
[truncated: 1,969 more rows]
[truncated: 8 more columns]
